# Supplementary material for: Proteogenomic Landscape of Gastric Adenocarcinoma Peritoneal Metastases
Source: Research Square preprint supplement (doi:10.21203/rs.3.rs-81037/v1), 2020-10-05
Supplement: Supplementary file 1 [file 001929703e2b915424fcc8f2.xlsx]

## Sheet: Supplementary Table-1. Characte
Sample	Tumor percentage	tumor Histology by MDACC	date of collection	Prognosis	Survival from ascites collection (month)	Survival from peritoneal metastasis (month)	subtype	Response for chemotherapy after peritoneal metastasis	Last follow up	Race	SEX	AGE	SITE Siewert class	Baseline T	Baseline N	Baseline M	location of Meta at Ascites collection	Primay Date of Gastric cancer Diagnosis	Primary Tumor Histology	Primary Tumor Grade	Primary Histological Type of Gastric Cancer	Primary Her2	Ascites Date of Peritoneal metastasis diagnosis	Chemotherapy_befor peritoneal metastasis	Chemotherapy 1st Date of Start_befor peritoneal metastasis	Regimen 1st	Chemotherapy 2nd Date of Start_befor peritoneal metastasis	Regimen 2nd	Chemotherapy 3rd Date of Start_befor peritoneal metastasis	Regimen 3rd	Chemotherapy_after peritoneal metastasis befor ascites collection	Chemotherapy 1st Date of Start_after peritoneal metastasis befor ascites collection	Regimen 1	Chemotherapy 2nd Date of Start_after peritoneal metastasis befor ascites collection	Regimen 2	Chemotherapy 3rd Date of Start_after peritoneal metastasis befor ascites collection	Regimen 3	Chemotherapy_after ascites collection	Chemotherapy 1st Date of Start_after ascites collection	Regimen 1s	Chemotherapy 2nd Date of Start_after ascites collection	Regimen 2n	mached DNA	RNA Sequencing
IPAS0993	80	SRC	01/06/2017	Dead	10.2667	18.1	E.b	Responder	43049	White	Female	34.8384	Gastric	T4	N+	M1	peritoneal	42506	Adenocarcinoma	G3 Poorly differentiated	Diffuse	negative	42506	No	N/A	N/A	N/A	N/A	N/A	N/A	YES	42553	5-FU, Oxaliplatin	N/A	N/A	N/A	N/A	Yes	42741	ramucirumab, paclitaxel	43000	FOLFIRI	No	No
IPAS7116	90	NOS	02/08/2018	alive	0.933333	8.13333333333333	N/A	Non responder	43167	White	Male	35	Gastric	T3	N+	M1	peritoneal	42914	Adenocarcinoma	G3 Poorly differentiated	Diffuse	negative	42923	No	N/A	N/A	N/A	N/A	N/A	N/A	YES	7/?/2017	5-FU, Oxaliplatin, Keytruda	43066	ramucirumab, paclitaxel	N/A	N/A	YES	42774	FOLFIRI	N/A	N/A	No	Yes
IPAS7107	70	NOS	10/23/2017	Dead	4.6	4.73333333333333	N/A	Non responder	43169	Hispanic	Male	36	Gastric	T3	N3	M1	peritoneal, LN, Liver	43012	Adenocarcinoma	G3 Poorly differentiated	Diffuse	negative	43027	No	N/A	N/A	N/A	N/A	N/A	N/A	No	N/A	N/A	N/A	N/A	N/A	N/A	YES	43032	5-FU, Oxaliplatin	43122	Docetaxel, Irinotecan	Yes	Yes
IPAS7106	90	SRC	10/19/2017	alive	2.4	2.4	N/A	Non responder	43099	White	Male	39	Gastric	T4	N+	M1	peritoneal, retroperitoneal LN	42793	Adenocarcinoma	G3 Poorly differentiated	Diffuse	negative	43027	Yes	42821	5-FU, Oxaliplatin	7/?/2017	ramucirumab, paclitaxel	43017	FOLFILI+Nivo	No	N/A	N/A	N/A	N/A	N/A	N/A	Continue	N/A	N/A	N/A	N/A	Yes	Yes
IPAS0981	70	N/A	07/22/2016	alive	2.36667	10.6333333333333	E.b	Responder	42644	White	Female	46.526	Gastric	T4	N1	M1	peritoneal	42345	N/A	N/A	N/A	negative	42325	No	N/A	N/A	N/A	N/A	N/A	N/A	Yes	42353	5-FU, Oxaliplatin	42546	FOLFILI	N/A	N/A	Yes	42602	ramucirumab, paclitaxel	N/A	N/A	Yes	Yes
IPAS0998	95	SRC	09/28/2016	Dead	1.16667	7.26666666666667	E.b	Responder	42676	Asian	Male	46.9479	Gastric	N/A	N+	M1	peritoneal	42445	Adenocarcinoma	G3 Poorly differentiated	Diffuse	negative	42458	No	N/A	N/A	N/A	N/A	N/A	N/A	YES	42469	5-FU, Oxaliplatin	N/A	N/A	N/A	N/A	Yes	42660	Everolimus, LDE225	N/A	N/A	Yes	Yes
IPAS7104	90	SRC	07/28/2017	alive	6.23333	11.4666666666667	N/A	Responder	43131	Black	Female	48	Gastric	N/A	N/A	M1	peritoneal	42860	Adenocarcinoma	G3 Poorly differentiated	Diffuse	negative	42787	No	N/A	N/A	N/A	N/A	N/A	N/A	Yes	5/?/2017	5-FU, Oxaliplatin	N/A	N/A	N/A	N/A	Yes	12/?/2017	ramucirumab, paclitaxel	43131	Pembrolizumab	Yes	Yes
IPAS7118	70	NOS	09/15/2017	alive	1.13333	12.1666666666667	E.b	Responder	43027	White	Male	48.9534	AEGIII	T3	N+	M1	peritoneal,Liver,Lung, pleura	42667	Adenocarcinoma	G2 Moderately differentiated	Intestinal	Positive	42662	No	N/A	N/A	N/A	N/A	N/A	N/A	YES	42684	5-FU, Oxaliplatin, Herceptin	8/?/2017	Paclitaxel	N/A	N/A	No	N/A	N/A	N/A	N/A	No	No
IPAS7115	70	SRC	12/12/2017	alive	1.43333	8.16666666666667	N/A	Responder	43124	White	Female	51	Gastric	T3	N+	M1	peritoneal, Ovary	42879	Adenocarcinoma	G3 Poorly differentiated	Diffuse	negative	42879	No	N/A	N/A	N/A	N/A	N/A	N/A	YES	42908	5-FU, Oxaliplatin	N/A	N/A	N/A	N/A	YES	1/?/2018	ramucirumab, paclitaxel	N/A	N/A	No	Yes
IPAS0983	30	NOS	09/22/2016	Dead	3.73333	8.03333333333333	M	Non responder	42747	White	Male	57.6603	AEG II	T3	N2	M1	adenal gland	42185	Adenocarcinoma	G2 Moderately differentiated	Intestinal	positive	42506	YES	42216	5-FU, Oxaliplatin, Herceptin	N/A	N/A	N/A	N/A	Yes	42528	5-FU, Irinotecan	42579	Trasttuzumab, Everolimus, Letrozole	N/A	N/A	Continue	N/A	N/A	N/A	N/A	No	No
IPAS7114	70	NOS	09/15/2016	Dead	1.53333	N/A	N/A	Non responder	42674	White	Female	58	AEG II	T3	N2	M1	liver	42594	Adenocarcinoma	G3 Poorly differentiated	Diffuse	N/A	N/A	YES	42623	5-FU, Oxaliplatin	N/A	N/A	N/A	N/A	No	N/A	N/A	N/A	N/A	N/A	N/A	Continue	N/A	N/A	N/A	N/A	Yes	Yes
IPAS7117	70	SRC	03/05/2018	alive	0.333333	7.46666666666667	N/A	Non responder	43174	Alabic	Female	58	Gastric	T3	N+	M1	peritoneal	42938	Adenocarcinoma	G3 Poorly differentiated	Diffuse	negative	42950	No	N/A	N/A	N/A	N/A	N/A	N/A	YES	42953	5-FU, Oxaliplatin	43041	ramucirumab, paclitaxel	N/A	N/A	Yes	43165	Pembrolizumab	N/A	N/A	No	Yes
IPAS7113	80	NOS	08/24/2016	Dead	9.83333	N/A	M	No treatment	42901	White	Female	58.8959	AEG II	T3	N1	M0	peritoneal	42269	Adenocarcinoma	G3 Poorly differentiated	Diffuse	negative	N/A	YES	42352	5-FU, Oxaliplatin	42422	RT,docetaxel,5-FU	N/A	N/A	No	N/A	N/A	N/A	N/A	N/A	N/A	No	N/A	N/A	N/A	N/A	Yes	Yes
IPAS0994	90	NOS	01/10/2017	alive	0.3	0.333333333333333	E.b	No treatment	42754	White	Female	59.3288	AEG II	N/A	N/A	M1	Liver	42247	Adenocarcinoma	G3 Poorly differentiated	Diffuse	negative	42744	YES	42276	5-FU, Oxaliplatin	42703	RT+capecitabine	N/A	N/A	No	N/A	N/A	N/A	N/A	N/A	N/A	No	N/A	N/A	N/A	N/A	Yes	Yes
IPAS0997	95	SRC	04/08/2016	Dead	4.16667	6.83333333333333	E.a	No treatment	42593	Hispanic	Male	61.8685	Gastric	T3	N0	M0	N/A	41299	Adenocarcinoma	G3 Poorly differentiated	Diffuse	negative	42388	YES	41402	docetaxel, oxaliplatin, 5-FU	41579	5-FU, Irinotecan	42275	42Gy + gemcitabine, 5-FU	No	N/A	N/A	N/A	N/A	N/A	N/A	No	N/A	N/A	N/A	N/A	Yes	Yes
IPAS0980	40	NOS	05/18/2016	alive	0.433333	0.433333333333333	M	No treatment	42521	Black	Female	63.6521	Gastric	N/A	N+	M1	peritoneal, retroeritoneal LN	42490	N/A	N/A	Intestinal	N/A	42508	No	N/A	N/A	N/A	N/A	N/A	N/A	No	N/A	N/A	N/A	N/A	N/A	N/A	No	N/A	N/A	N/A	N/A	Yes	Yes
IPAS7105	70	SRC	09/15/2017	alive	4.4	34.5	E.b	Responder	43125	White	Female	65.0959	Gastric	T3	N+	M1	peritoneal, Ovary	42096	Adenocarcinoma	G3 Poorly differentiated	Diffuse	negative	42090	No	N/A	N/A	N/A	N/A	N/A	N/A	YES	42114	5-FU, Oxaliplatin	2/?/2016	ramucirumab, paclitaxel	42943	FOLFIRI	YES	42998	2016-0386 JTX-2011,Nivolumab	N/A	N/A	No	No
IPAS0996	85	SRC	01/13/2017	Dead	7.56667	22.1	E.b	Responder	42975	Hispanic	Male	66.1397	Gastric	N/A	N+	M1	peritoneal	42257	Adenocarcinoma	G3 Poorly differentiated	Diffuse	negative	42312	No	N/A	N/A	N/A	N/A	N/A	N/A	YES	42320	5-FU, Oxaliplatin	N/A	N/A	N/A	N/A	Yes	42768	ramucirumab, paclitaxel	42947	FOLFIRI	Yes	Yes
IPAS7103	85	N/A	03/21/2017	alive	0.3	1.4	N/A	No treatment	42824	Black	Male	67	Gastric	N/A	N/A	N/A	Peritoneal, Liver	N/A	N/A	N/A	N/A	N/A	42782	YES	N/A	FOLFOX	N/A	N/A	N/A	N/A	No	N/A	N/A	N/A	N/A	N/A	N/A	No	N/A	N/A	N/A	N/A	Yes	Yes
IPAS0995	95	NOS	01/12/2017	alive	1.86667	17.1333333333333	E.a	Responder	42803	Hispanic	Female	68.1233	Gastric	N/A	N/A	M1	peritoneal	42320	Adenocarcinoma	G3 Poorly differentiated	Diffuse	negative	42289	No	N/A	N/A	N/A	N/A	N/A	N/A	YES	42340	5-FU, Oxaliplatin, Docetaxel	42655	ramucirumab, paclitaxel	N/A	N/A	No	N/A	N/A	N/A	N/A	Yes	Yes
IPAS7100	80	SRC	12/13/2016	Dead	0.5	0.5	M	Non responder	42732	Other	Male	68.5671	AEGIII	T3	N3	M1	peritoneal, supraclavicular	42709	Adenocarcinoma	G3 Poorly differentiated	Diffuse	N/A	42717	No	N/A	N/A	N/A	N/A	N/A	N/A	No	N/A	N/A	N/A	N/A	N/A	N/A	No	N/A	N/A	N/A	N/A	Yes	Yes
IPAS7112	60	NOS	08/24/2016	alive	1.76667	9.46666666666667	M	Non responder	42629	White	Male	69.7918	Gastric	T3	N1	M1	peritoneal, liver	42347	Adenocarcinoma	G3 Poorly differentiated	Diffuse	negative	42345	No	N/A	N/A	N/A	N/A	N/A	N/A	Yes	42391	5-FU, Oxaliplatin	N/A	N/A	N/A	N/A	Yes	42579	FOLFILI	N/A	N/A	No	No
IPAS0999	75	SRC	11/08/2016	Dead	0.566667	4.06666666666667	E.b	Non responder	42699	White	Male	70.7288	AEG II	T3	N0	M1	peritoneal	42517	Adenocarcinoma	G3 Poorly differentiated	Diffuse	N/A	42577	No	N/A	N/A	N/A	N/A	N/A	N/A	YES	42591	5-FU, Oxaliplatin	N/A	N/A	N/A	N/A	No	N/A	N/A	N/A	N/A	Yes	Yes
IPAS0982	80	NOS	08/05/2016	Dead	3	19.9333333333333	E.a	Responder	42677	Asian	Male	72.8027	Gastric	N/A	N/A	M1	peritoneal	42062	Adenocarcinoma	G3 Poorly differentiated	Diffuse	negative	42079	No	N/A	N/A	N/A	N/A	N/A	N/A	Yes	42080	ECF	N/A	ramucirumab, paclitaxel	42390	FOLFILI	Continue	N/A	N/A	N/A	N/A	Yes	Yes
IPAS7102	90	NOS	02/02/2017	Dead	6.1	6.1	N/A	Non responder	42951	White	Female	80	Gastric	N/A	N/A	N/A	peritoneal	42240	Adenocarcinoma	G2 Moderately differentiated	Intestinal	negative	42768	YES	11/?/2015	5-FU,	Ramucirumab	42422	N/A	N/A	No	N/A	N/A	N/A	N/A	N/A	N/A	Yes	42772	ramucirumab, paclitaxel	N/A	N/A	Yes	Yes
IPAS0979	80	NOS	02/29/2016	Dead	1.2	9	E.a	Non responder	42465	Hispanic	Male	82.2219	Gastric	T3	N+	M1	peritoneal, Liver	42188	Adenocarcinoma	G3 Poorly differentiated	Diffuse	negative	42195	No	N/A	N/A	N/A	N/A	N/A	N/A	Yes	42214	RT 30Gy	42425	5-FU, Oxaliplatin	N/A	N/A	Yes	42439	5-FU, Irinotecan	N/A	N/A	Yes	Yes
