# Supplementary material for: Proteogenomic Landscape of Gastric Adenocarcinoma Peritoneal Metastases
Source: Research Square preprint supplement (doi:10.21203/rs.3.rs-81037/v1), 2020-10-05
Supplement: Supplementary file 2 [file 38395de2866b2f45c8e205ab.xlsx]

## Sheet: TCE_2361_SigProteins_between_Tu
Proteins	pvalue_aov	pvalue_AvsB	pvalue_AvsC	pvalue_BvsC	log2FC_AvsB	log2FC_AvsC	log2FC_BvsC
MISP	1.25344e-15	5.11982e-15	2.30101e-13	1	5.82318	5.82318	0
JUP	2.73872e-10	0.000881391	1.50458e-10	3.45531e-08	1.96153	7.30111	5.33958
FAM83H	3.89327e-10	4.19769e-09	5.83404e-09	0.207564	5.5322	6.46097	0.928771
AP1M2	1.16288e-09	0.00198447	6.49467e-10	1.13439e-07	1.67745	6.34201	4.66456
CHCHD6	1.24456e-09	6.74552e-09	3.9658e-08	0.572685	3.40097	3.65947	0.258496
ABCD3	1.98252e-09	0.982401	3.19045e-09	3.19045e-09	-0.0107072	5.68741	5.69812
UBAP2	2.94633e-09	1.45223e-08	9.52305e-08	0.636988	4.23852	4.51926	0.280735
COQ7	3.29661e-09	1.45293e-08	1.24409e-07	0.723941	4.03881	4.23881	0.2
ALDH18A1	6.73902e-09	0.0433102	4.89245e-09	1.10229e-07	1.16419	6.4533	5.28911
NCKAP1	1.25081e-08	0.00862352	7.35044e-09	6.42329e-07	1.49253	6.02782	4.5353
BZW2	1.60393e-08	0.0479102	1.14829e-08	2.59669e-07	1.0861	5.88298	4.79688
EIF1B	1.80738e-08	1.10243e-07	3.23011e-07	0.482348	3.23274	3.59124	0.358496
ISY1	1.8619e-08	2.8721e-07	1.26643e-07	0.0521132	3.40981	4.60639	1.19658
EPB41L1	1.96413e-08	2.688e-05	1.75547e-08	0.000153039	3.26581	6.70224	3.43643
ALDH7A1	2.01811e-08	0.000683625	1.13295e-08	7.60044e-06	2.12917	6.14994	4.02078
DSG2	2.502e-08	7.0891e-05	1.89842e-08	7.70531e-05	3.34543	7.37392	4.02848
CTTN	2.80856e-08	7.08802e-05	2.01552e-08	7.08802e-05	3.11723	7.07951	3.96228
GNPAT	2.88934e-08	0.833722	5.31894e-08	5.31894e-08	0.112226	5.4718	5.35957
REEP6	2.8947e-08	1.03123e-06	1.04561e-07	0.0165425	3.39686	5.02678	1.62992
EIF1AX	3.13116e-08	2.20474e-07	2.20474e-07	0.163235	3.82947	4.75939	0.929921
CTNNB1	4.75561e-08	0.0193103	2.91825e-08	1.59036e-06	1.76294	7.53219	5.76925
PKP3	4.827e-08	8.56819e-07	2.60814e-07	0.0464699	4.89399	6.78298	1.88899
PGM3	5.08158e-08	0.000166096	3.41209e-08	8.57471e-05	2.88649	6.85012	3.96363
BCL7B	5.87103e-08	1.74046e-07	2.54341e-06	1	3.10784	3.10784	0
TFRC	6.63298e-08	0.100514	5.20555e-08	6.82532e-07	0.718684	4.36949	3.6508
AGPAT2	7.14896e-08	2.36203e-06	2.42631e-07	0.020668	3.1093	4.62302	1.51372
GOLGA5	8.87274e-08	0.0847864	6.64559e-08	1.04803e-06	0.914491	5.20864	4.29415
MLEC	9.18254e-08	0.00356333	5.15032e-08	1.21102e-05	0.961962	3.08487	2.12291
SLC25A22	1.24902e-07	0.000840598	7.4986e-08	5.93879e-05	1.91609	5.08672	3.17063
CD46	1.38995e-07	6.31391e-05	1.43346e-07	0.000908073	2.40159	4.67481	2.27322
HSPD1	1.42457e-07	0.000201427	1.05605e-07	0.000201427	1.34143	3.00568	1.66425
CDC42EP4	1.52536e-07	8.02807e-07	2.2603e-06	0.553456	3.8031	4.2031	0.4
EPCAM	1.77507e-07	0.00104308	1.06795e-07	7.50349e-05	2.37302	6.31641	3.94339
GALNT7	1.91456e-07	0.0165002	1.13134e-07	8.24203e-06	1.60563	6.17643	4.57081
EPHX2	2.17022e-07	1.37123e-06	1.37123e-06	0.197164	4.62866	5.79077	1.16211
CCDC124	2.29635e-07	3.81177e-06	1.04798e-06	0.0574866	3.10518	4.3614	1.25622
RAB11A	2.37119e-07	0.00410983	1.34944e-07	3.2207e-05	0.833131	2.5749	1.74177
HSD17B2	2.46509e-07	0.000149722	2.24615e-07	0.000758195	3.63933	7.41004	3.77071
AK1	2.48119e-07	2.30179e-06	1.76025e-06	0.121956	3.94417	5.18289	1.23872
AFG3L2	2.54953e-07	0.000480092	1.71817e-07	0.000240471	2.20674	5.2726	3.06587
GTF2F1	2.6234e-07	4.99645e-07	1.9075e-05	0.661721	4.00009	3.69889	-0.301197
EIF4G1	2.98399e-07	0.00842792	1.7071e-07	2.30749e-05	1.2262	4.1336	2.9074
MRPL40	3.13501e-07	2.61386e-06	2.34663e-06	0.140594	2.35088	3.05856	0.707682
PLS1	3.20905e-07	0.00628036	1.83085e-07	3.19283e-05	1.69861	5.46367	3.76507
LPCAT4	3.27555e-07	1.96587e-05	6.65765e-07	0.0116557	3.39148	5.50384	2.11236
TIMM44	3.52244e-07	0.00529462	2.01412e-07	4.09518e-05	1.47763	4.61508	3.13744
PAICS	3.65771e-07	0.00404196	2.10389e-07	5.37814e-05	1.89517	5.69394	3.79878
EIF1AY	4.14913e-07	2.52446e-06	2.52446e-06	0.208364	3.27413	4.10811	0.833985
APP	4.21711e-07	3.5926e-06	2.94846e-06	0.138021	4.04388	5.29604	1.25216
ATP1A2	4.42949e-07	0.106433	3.29144e-07	4.65695e-06	0.668286	3.71549	3.0472
AGPAT5	4.57786e-07	0.000119954	5.01254e-07	0.00217843	2.90386	5.52943	2.62557
PYCR1	4.59666e-07	0.000523232	3.24422e-07	0.000459045	3.20626	7.44047	4.23421
AGR3	4.7957e-07	0.000497698	3.42867e-07	0.000497698	2.74163	6.30963	3.568
MTX1	5.82237e-07	0.074593	4.00701e-07	8.22387e-06	0.782715	3.86887	3.08615
STAU1	5.94395e-07	5.20284e-05	9.4723e-07	0.00802999	3.40475	5.82424	2.41949
MTX2	6.54138e-07	0.00064836	4.62946e-07	0.000573541	1.70824	3.96503	2.25679
PRRC2C	6.67375e-07	3.84422e-06	6.53794e-06	0.488168	5.0183	5.70158	0.683289
PTCD3	7.0697e-07	0.226978	6.30609e-07	4.0184e-06	0.688517	4.98107	4.29255
LIMA1	7.07988e-07	1.85972e-05	2.03134e-06	0.0350738	4.85454	7.31549	2.46095
FAM3C	7.2863e-07	0.0227621	4.34773e-07	2.73191e-05	1.10267	4.14995	3.04727
MUT	8.73628e-07	0.101068	6.28486e-07	9.777e-06	0.677211	3.56117	2.88396
ACBD5	9.28746e-07	0.00207577	5.80894e-07	0.000287397	2.29499	5.97017	3.67517
PURB	9.92728e-07	4.65956e-06	1.16057e-05	0.597362	2.67777	2.9585	0.280735
COQ9	1.02171e-06	0.000526193	8.66457e-07	0.00123248	1.91603	4.0272	2.11117
FBL	1.0355e-06	0.00400115	6.18241e-07	0.000179112	1.96885	5.53633	3.56748
CTNNA1	1.09646e-06	0.0312138	6.67582e-07	3.26472e-05	1.36642	5.32917	3.96275
ATP1A1	1.13055e-06	0.182127	9.27362e-07	7.77465e-06	0.434917	2.77211	2.33719
INTS4	1.15054e-06	0.0503496	7.35255e-07	2.31149e-05	1.17716	5.07079	3.89363
STX4	1.29055e-06	0.000815232	9.47534e-07	0.000815232	1.68088	3.82318	2.1423
BPNT1	1.47483e-06	0.000583766	1.29376e-06	0.00173952	2.97578	6.16117	3.18539
NHP2	1.48569e-06	3.21124e-05	4.2974e-06	0.0468587	3.36359	5.02976	1.66618
PNN	1.49847e-06	4.75754e-05	3.46143e-06	0.0296558	3.47934	5.44078	1.96144
COG7	1.75192e-06	0.0265177	1.05116e-06	6.18187e-05	1.10237	4.04607	2.94371
TJP2	1.85057e-06	2.50281e-05	7.03664e-06	0.0828154	5.13603	7.29159	2.15556
CS	1.99388e-06	0.00101367	1.60873e-06	0.00141834	1.2629	2.72484	1.46194
S100A8	1.99902e-06	1.00073e-05	1.83793e-05	0.549893	-2.63962	-2.96979	-0.33017
CKMT1B	2.09684e-06	7.51092e-05	4.32722e-06	0.0264471	4.2959	6.86521	2.56931
SARG	2.17739e-06	2.27185e-05	9.73189e-06	0.112992	3.27518	4.51505	1.23987
UGT1A8	2.39163e-06	0.00189355	1.6311e-06	0.000946756	2.47911	5.9822	3.50309
MARCKSL1	2.44864e-06	2.90523e-05	9.74612e-06	0.0975414	2.72712	3.82953	1.10241
NAA25	2.4556e-06	0.00045429	2.54048e-06	0.00424279	2.6027	5.0393	2.4366
GOSR1	2.54947e-06	0.313359	2.42667e-06	1.08573e-05	0.442031	3.53821	3.09618
PITRM1	2.67017e-06	0.00325766	1.71334e-06	0.000639987	1.91151	4.91183	3.00032
SPR	2.70591e-06	0.00251944	1.79301e-06	0.000829673	1.93572	4.80387	2.86815
DENR	2.82584e-06	1.36117e-05	2.5192e-05	0.565959	2.58486	2.90185	0.316993
DSTN	2.82856e-06	0.0058095	1.72853e-06	0.000398666	1.38082	3.82947	2.44865
UNC45A	2.86903e-06	0.0220456	1.70883e-06	0.000123046	1.36003	4.67373	3.3137
CD3EAP	2.88477e-06	3.15303e-05	1.18469e-05	0.107805	3.18981	4.44689	1.25708
UBL5	3.02706e-06	1.24963e-05	3.24749e-05	0.655404	2.11331	2.31331	0.2
ACSL3	3.04339e-06	0.094081	2.08776e-06	3.74557e-05	1.05003	5.00906	3.95903
NOP16	3.06909e-06	4.19112e-05	1.06379e-05	0.0834059	2.82287	4.05279	1.22992
CDK5RAP3	3.13382e-06	0.0204841	1.86418e-06	0.000144278	0.917862	3.09461	2.17675
PDLIM1	3.18728e-06	0.0024625	2.14886e-06	0.00102412	1.84169	4.50532	2.66362
ATP4A	3.40526e-06	0.36033	9.38906e-06	3.9445e-06	-0.369503	2.84405	3.21355
CSNK1A1	3.70432e-06	0.0577153	2.36116e-06	6.99683e-05	1.42283	5.88708	4.46425
RPS4X	3.79258e-06	0.00173691	2.97757e-06	0.00176113	2.10626	4.62485	2.51858
GFPT1	3.93941e-06	0.0251654	2.36246e-06	0.000153892	1.85833	6.41357	4.55523
CWC27	3.94277e-06	2.15972e-05	2.77955e-05	0.493609	3.24208	3.73277	0.490689
TMCO1	3.9797e-06	0.00789321	2.42343e-06	0.000440239	1.56216	4.43023	2.86807
GNG12	4.02942e-06	9.02783e-05	9.75879e-06	0.0476082	2.44348	3.75236	1.30888
SCRIB	4.15795e-06	0.00154703	3.14775e-06	0.00154703	2.88819	6.48659	3.5984
TIMM50	4.25045e-06	0.0556691	2.69391e-06	8.33034e-05	1.03134	4.19329	3.16196
AGR2	4.27992e-06	0.003364	2.83741e-06	0.00106281	2.79997	6.99359	4.19362
PRTN3	4.66158e-06	1.96517e-05	4.37962e-05	0.633924	-3.04566	-3.36331	-0.317646
FN3K	4.86131e-06	2.18453e-05	4.16185e-05	0.595827	2.20714	2.46563	0.258496
BZW1	4.87746e-06	0.00393538	3.20373e-06	0.00106051	1.76355	4.45944	2.69589
TPD52	4.98298e-06	0.759581	7.59509e-06	8.60272e-06	0.19216	4.74703	4.55487
ATP1A4	4.99721e-06	0.0353632	3.04786e-06	0.000146822	0.772746	2.8099	2.03715
YIPF3	5.06204e-06	0.000710191	5.29311e-06	0.00628486	2.07726	4.00149	1.92423
ATP1A3	5.20258e-06	0.464609	5.74676e-06	1.50259e-05	0.219912	2.30536	2.08545
HACD3	5.3179e-06	0.0135009	3.19923e-06	0.000370751	1.36841	4.14453	2.77612
SEC22B	5.39298e-06	0.207151	4.34681e-06	3.33202e-05	0.344857	2.11013	1.76527
COG5	5.45481e-06	0.000255802	8.62102e-06	0.0210109	4.00556	6.7829	2.77734
CTNND1	5.61397e-06	0.0605982	3.57996e-06	0.00010325	1.23426	5.03181	3.79755
PNKD	5.62203e-06	0.0144576	3.38218e-06	0.000370085	1.38423	4.22513	2.84089
TMPO	5.69434e-06	0.00211786	4.44363e-06	0.00211786	1.45653	3.21622	1.75969
TP53I11	5.95123e-06	0.00221183	4.71685e-06	0.00233087	2.07853	4.5486	2.47007
EIF4A2	6.04576e-06	0.0207627	3.63187e-06	0.000288648	0.590448	1.91127	1.32082
STK39	6.10961e-06	0.000309378	9.18339e-06	0.0194645	3.3519	5.74935	2.39745
KRT8	6.14405e-06	0.040596	3.78023e-06	0.000161509	0.660248	2.43909	1.77884
OCLN	6.14619e-06	0.00373476	4.14373e-06	0.00144756	2.0901	5.16137	3.07127
UGT1A10	6.35645e-06	0.00258776	4.55119e-06	0.00215075	2.79285	6.54492	3.75207
CDH1	6.39079e-06	0.000221479	1.14e-05	0.0298148	3.97822	6.52412	2.54591
PPP1R8	6.99995e-06	8.12744e-05	2.3464e-05	0.102661	3.02916	4.33584	1.30668
GOLIM4	7.34261e-06	0.000227557	1.35688e-05	0.0340812	3.82536	6.2127	2.38734
RPS18	7.52687e-06	0.00619453	4.84725e-06	0.00111845	1.94026	5.07729	3.13703
SUN1	8.00405e-06	0.0201236	4.8374e-06	0.000400864	2.03316	6.42103	4.38787
ACOX1	8.1011e-06	0.00832855	5.09722e-06	0.000917106	1.26451	3.44271	2.1782
PDXDC1	8.68767e-06	0.00266896	6.79936e-06	0.00266896	3.49956	7.73248	4.23291
IPO4	8.69075e-06	0.0690163	5.59757e-06	0.000144461	1.46278	5.98884	4.52606
EGFR	8.69908e-06	0.000133131	2.33496e-05	0.0757073	4.5049	6.7205	2.2156
NUP98	8.92763e-06	0.0855083	5.90699e-06	0.000122612	1.29317	5.60036	4.30719
ATP5I	9.01169e-06	0.000811851	1.02415e-05	0.0107426	1.59737	2.98172	1.38435
NDRG1	9.35569e-06	0.00267427	6.95641e-06	0.00267427	2.21842	5.07349	2.85506
GADD45GIP1	9.75199e-06	8.15504e-05	3.90221e-05	0.148503	2.12822	2.9359	0.807682
STX3	9.92928e-06	0.000485328	1.41701e-05	0.0209983	2.44873	4.25008	1.80135
NUFIP2	1.01314e-05	5.65017e-05	5.60672e-05	0.2307	2.7119	3.53478	0.822882
LRRC1	1.04158e-05	0.0145395	6.40124e-06	0.000716602	1.71698	5.02808	3.3111
PAM16	1.04736e-05	2.5195e-05	0.000181746	1	1.8965	1.8965	0
FLNB	1.0824e-05	0.000417178	1.69718e-05	0.0273983	2.07682	3.50862	1.4318
TBRG4	1.08941e-05	0.0288593	6.63746e-06	0.000400628	1.68384	5.57639	3.89255
NCF2	1.09565e-05	0.000297945	2.03524e-05	0.0402677	-3.377	-5.45989	-2.08289
PTGES2	1.12107e-05	0.0113016	7.01416e-06	0.000981337	1.61128	4.50039	2.88911
S100A9	1.12547e-05	6.03906e-05	6.03906e-05	0.469285	-2.08087	-2.44145	-0.360575
VIL1	1.14136e-05	0.00732485	7.43356e-06	0.00150868	3.094	8.05842	4.96442
HID1	1.15882e-05	0.000311287	2.14723e-05	0.0409259	3.74939	6.06288	2.31349
TJP3	1.17562e-05	5.40474e-05	7.86717e-05	0.566968	4.06177	4.61095	0.549185
NOP56	1.21312e-05	0.0147616	7.49742e-06	0.000832446	1.67594	4.86809	3.19216
ITGA6	1.23098e-05	0.000950631	1.42298e-05	0.0130229	3.5761	6.62935	3.05326
KIAA1522	1.24696e-05	5.57272e-05	8.51227e-05	0.581184	3.2539	3.67869	0.424793
YAP1	1.25087e-05	0.000139578	3.87112e-05	0.108343	3.06969	4.43111	1.36142
WDR18	1.27141e-05	0.00193007	1.17613e-05	0.00641128	2.56436	5.19429	2.62993
CYB5B	1.29703e-05	0.222194	1.0372e-05	7.47514e-05	0.300489	1.79358	1.49309
CCDC51	1.30298e-05	0.000881675	1.57081e-05	0.0150695	2.38167	4.35115	1.96948
FAM50A	1.34421e-05	3.72955e-05	0.000173078	0.883746	3.24877	3.35752	0.108746
EXOSC6	1.35032e-05	0.000215951	3.26526e-05	0.0729686	2.6213	3.97923	1.35793
SFXN1	1.41119e-05	0.00389491	1.02609e-05	0.00352325	1.09286	2.55245	1.45959
MFN1	1.42267e-05	0.00441707	1.013e-05	0.00314035	2.2385	5.32023	3.08173
PRRC2A	1.48406e-05	2.18319e-05	0.000594333	0.611398	4.00867	3.55908	-0.449586
KPNA1	1.52532e-05	0.0251093	9.3554e-06	0.000649111	1.32175	4.16101	2.83925
PKP2	1.56331e-05	5.14106e-05	0.000150514	0.761074	4.84833	5.19427	0.345943
IARS2	1.56431e-05	0.032583	9.61041e-06	0.000524336	1.19488	3.95505	2.76017
LONP1	1.5904e-05	0.00352917	1.30386e-05	0.00444665	1.68812	3.64038	1.95226
ZW10	1.6351e-05	0.0214708	1.00767e-05	0.000807645	1.7138	5.21166	3.49786
F11R	1.67281e-05	0.00954904	1.08789e-05	0.00177597	1.30861	3.4548	2.14619
TPRN	1.6854e-05	3.96294e-05	0.000264641	1	2.89667	2.89667	0
MRPL53	1.68696e-05	0.00412253	1.2386e-05	0.00405938	1.37724	3.19867	1.82143
PIGS	1.70716e-05	0.399195	1.67287e-05	5.56015e-05	0.4234	3.57007	3.14667
RARS	1.71256e-05	0.0717096	1.10189e-05	0.000279765	1.2974	5.12496	3.82756
SPTBN1	1.71327e-05	0.0112996	1.098e-05	0.00155211	1.05984	2.87072	1.81088
AKAP1	1.73307e-05	0.000113709	7.47047e-05	0.192989	4.03565	5.44777	1.41212
PRKAG1	1.73836e-05	0.0613291	1.10243e-05	0.000327742	0.908255	3.44305	2.53479
COG6	1.74879e-05	0.00264779	1.56651e-05	0.00663452	2.56867	5.28588	2.71721
ATP2B2	1.80222e-05	0.000397707	3.44925e-05	0.0517006	2.68855	4.29623	1.60768
HEXIM1	1.80371e-05	8.88607e-05	8.88607e-05	0.261075	2.54351	3.2927	0.749185
PIGT	1.85288e-05	0.0472664	1.15514e-05	0.000444351	1.4564	5.16469	3.70829
BOLA2	1.92371e-05	0.000577034	3.11401e-05	0.0371218	1.96795	3.28237	1.31443
GNA11	1.96846e-05	0.00403692	1.61301e-05	0.00492357	2.38899	5.1592	2.77021
ATL2	1.98147e-05	0.00586746	1.39295e-05	0.00342182	2.06946	5.00079	2.93132
MDH1	2.00227e-05	0.000368507	4.16211e-05	0.063211	2.17699	3.40649	1.22951
TSG101	2.00901e-05	0.00449434	1.61036e-05	0.0045185	1.88866	4.13383	2.24517
DDRGK1	2.03828e-05	0.0316887	1.25864e-05	0.000709523	1.21881	3.93699	2.71818
SAR1B	2.04307e-05	0.00494844	1.48269e-05	0.00418429	1.88968	4.44098	2.5513
NUDT9	2.10714e-05	0.000137915	8.73479e-05	0.193177	3.29519	4.46662	1.17142
MATR3	2.11579e-05	0.051674	1.32673e-05	0.000469422	0.801257	2.8741	2.07284
GPI	2.18478e-05	0.00918336	1.45518e-05	0.00246099	0.816992	2.10105	1.28406
ILF2	2.24663e-05	0.0132769	1.44331e-05	0.00178054	0.88515	2.41445	1.5293
FAM188A	2.31996e-05	7.12377e-05	0.000220651	0.79528	2.54	2.6985	0.158496
FAM3D	2.32363e-05	8.98148e-05	8.98148e-05	0.333364	3.75424	4.70343	0.949185
NARS2	2.33953e-05	0.00324291	2.08381e-05	0.0074583	2.68415	5.54315	2.859
UMPS	2.34406e-05	0.00196818	2.43029e-05	0.0125365	2.72153	5.24805	2.52651
TRAP1	2.34657e-05	0.0294478	1.45437e-05	0.000880055	1.17552	3.70334	2.52782
RPS5	2.34674e-05	0.0219283	1.46447e-05	0.00115993	1.12736	3.35336	2.226
LMAN2L	2.39009e-05	0.0125569	1.54918e-05	0.00200641	1.76247	4.74024	2.97777
ST14	2.42211e-05	0.000165484	9.42403e-05	0.18436	2.6874	3.67809	0.990689
PYGM	2.45794e-05	0.0238472	1.53209e-05	0.00112554	2.02427	6.09745	4.07318
SCFD1	2.48672e-05	0.011287	1.63354e-05	0.00231883	1.36519	3.5959	2.2307
AUP1	2.51833e-05	0.0019838	2.64435e-05	0.0134701	2.50456	4.80447	2.29991
XPO5	2.54356e-05	0.313419	7.83913e-05	2.50496e-05	-0.768246	4.55849	5.32673
THEM6	2.54903e-05	0.000723008	4.05616e-05	0.0398904	2.91	4.86611	1.95611
CKMT1A	2.55629e-05	0.0010166	3.48324e-05	0.0277731	3.59448	6.29141	2.69694
LRRC59	2.56498e-05	0.0234994	1.60216e-05	0.00119347	1.15793	3.46724	2.30931
ITGAM	2.56535e-05	9.51366e-05	0.000183571	0.672109	-4.77608	-5.27392	-0.497846
YWHAZ	2.57769e-05	0.00659175	1.82572e-05	0.0040653	0.558272	1.34549	0.787219
LMO7	2.58629e-05	0.0205813	1.62499e-05	0.00136415	2.21403	6.46175	4.24772
TIMM13	2.5966e-05	0.000615637	4.50494e-05	0.048412	2.06821	3.37776	1.30956
NIPSNAP1	2.62122e-05	0.873462	3.57592e-05	3.57592e-05	0.0825615	3.47033	3.38777
GSDML	2.62545e-05	7.16917e-05	0.000286203	0.872831	3.95768	4.11003	0.152356
TSTD1	2.62796e-05	0.000107461	0.000107461	0.431905	3.14257	3.77847	0.635896
LRPPRC	2.65894e-05	0.255256	2.16847e-05	0.000132998	0.774855	4.72211	3.94725
AIMP1	2.71667e-05	0.00676063	1.92641e-05	0.00419784	1.66429	4.0103	2.34601
PRRC1	2.80235e-05	0.308626	2.43138e-05	0.000116358	0.573048	3.88154	3.30849
FAM114A1	2.87013e-05	0.012664	1.88157e-05	0.00241968	1.87277	4.97494	3.10217
CYP2S1	2.91021e-05	0.0169132	1.86145e-05	0.0018615	1.6277	4.5432	2.9155
NOSIP	2.94172e-05	0.000223824	0.00010121	0.164257	3.27238	4.57266	1.30028
HSPA1B	3.00169e-05	0.0109574	2.00615e-05	0.00291867	0.667593	1.72484	1.05725
CTNNBL1	3.00634e-05	0.00454645	2.55157e-05	0.006969	2.44643	5.1889	2.74247
DHX9	3.09797e-05	0.168114	2.25628e-05	0.000230512	0.465626	2.3198	1.85417
RNASE2	3.1169e-05	0.0913237	2.05286e-05	0.000411171	-0.817617	-3.3121	-2.49449
DHX36	3.1391e-05	0.000150644	0.000150644	0.265536	3.36697	4.39365	1.02668
PRDX2	3.16157e-05	0.000269578	9.8602e-05	0.145519	1.38787	1.97583	0.587968
RABL3	3.34336e-05	0.000143429	0.000143429	0.472233	2.84588	3.37808	0.532193
GCNT3	3.34359e-05	0.000211449	0.000129105	0.199274	4.01658	5.4774	1.46082
YTHDF1	3.37892e-05	0.000160942	0.000160942	0.517151	2.21385	2.58389	0.370044
HSPBP1	3.39869e-05	0.00549667	2.56436e-05	0.00549667	2.26727	5.19846	2.93119
QSOX2	3.51716e-05	0.00211706	3.88968e-05	0.0182251	2.54523	4.78091	2.23569
PEX14	3.53492e-05	0.00297032	3.48784e-05	0.0128849	1.60521	3.16029	1.55507
DCTPP1	3.55275e-05	0.000788252	6.05411e-05	0.0524534	2.59735	4.25068	1.65333
ATAD3C	3.58648e-05	0.00126867	4.88987e-05	0.0319342	2.26031	3.94756	1.68726
ATP12A	3.60326e-05	0.0126151	2.40207e-05	0.00309404	1.66146	4.33431	2.67285
ZC3H15	3.61934e-05	0.000969452	5.59883e-05	0.0429294	2.32313	3.90541	1.58228
SF3A2	3.69322e-05	0.000712032	6.73134e-05	0.060998	2.17039	3.48783	1.31744
ATP1B1	3.76523e-05	0.0740973	2.4278e-05	0.000605196	1.31332	4.95032	3.63699
FA2H	3.77614e-05	0.000358877	0.000105325	0.129642	2.65402	3.85805	1.20403
PDZD11	3.80115e-05	0.000144991	0.000144991	0.43578	1.89231	2.283	0.390689
CLINT1	3.81726e-05	0.0331985	2.39735e-05	0.0013047	1.21417	3.78319	2.56902
DNAJA3	3.81895e-05	0.0946123	2.52312e-05	0.000488187	1.01323	4.08761	3.07437
FXYD3	3.84667e-05	0.240204	3.04806e-05	0.000202721	0.593948	3.41758	2.82363
ATXN2L	3.85603e-05	0.000634308	7.61327e-05	0.0723145	3.61434	5.68845	2.07411
PSME3	3.89646e-05	0.121759	2.66334e-05	0.000392885	1.03947	4.53246	3.49299
C2orf49	3.89681e-05	8.78922e-05	0.00050954	1	1.82147	1.82147	0
PAIP1	4.06761e-05	0.019303	2.62501e-05	0.00233469	1.5348	4.27832	2.74352
PYGB	4.07534e-05	0.0474568	2.56823e-05	0.000996626	0.995323	3.3385	2.34318
SPINT2	4.1076e-05	0.0018719	4.94152e-05	0.0245866	3.13864	5.71217	2.57353
FAM213A	4.24994e-05	0.00102545	6.7392e-05	0.0481918	2.55139	4.25333	1.70193
TJP1	4.29421e-05	0.000265044	0.000160108	0.203647	4.4156	6.03773	1.62213
DCI	4.34506e-05	0.000180276	0.000180276	0.305548	2.87286	3.68986	0.816993
ZNF90	4.43901e-05	0.00362064	4.30354e-05	0.0134741	2.13949	4.24616	2.10668
ARL6IP1	4.58357e-05	0.00742273	3.3815e-05	0.00672305	1.84369	4.32337	2.47968
CHCHD2	4.60116e-05	0.000381028	0.00013569	0.149749	2.49616	3.57575	1.07959
MUC13	4.64745e-05	0.00283162	4.93503e-05	0.0182636	2.64638	5.04879	2.40241
TMED2	4.66037e-05	0.0059164	3.62916e-05	0.0059164	1.50931	3.39235	1.88304
GPHN	4.71704e-05	0.000524637	0.000113498	0.109758	2.93446	4.39464	1.46018
MCU	4.82804e-05	0.0365929	3.05105e-05	0.00151654	1.58857	4.96495	3.37638
RAN	4.85065e-05	0.0046168	4.44287e-05	0.0115606	1.29015	2.63212	1.34197
CSE1L	4.85132e-05	0.0843036	3.16564e-05	0.000692491	0.944474	3.62147	2.677
PSMD5	4.9427e-05	0.0113563	3.42757e-05	0.0047925	1.06291	2.65662	1.59372
AGPAT1	5.00544e-05	0.0365024	3.16697e-05	0.00157766	1.00445	3.12913	2.12467
PAFAH1B3	5.03545e-05	0.00424969	4.7598e-05	0.0131045	2.50445	5.0309	2.52645
SEC24A	5.04054e-05	0.00210228	6.10106e-05	0.0272114	2.18291	3.96077	1.77785
PYCR2	5.08978e-05	0.000713548	0.000104757	0.085958	3.51309	5.45556	1.94247
TMX2	5.22153e-05	0.175916	3.80082e-05	0.000370103	0.934767	4.56906	3.6343
CTSE	5.39624e-05	0.000184771	0.000348576	0.70065	3.70659	4.07664	0.370044
ALG5	5.43757e-05	0.000692706	0.00011702	0.0951343	2.65849	4.08036	1.42188
ITM2B	5.45464e-05	0.000245634	0.000245634	0.279741	2.45711	3.21561	0.758496
TMEM68	5.46393e-05	0.00150035	7.82073e-05	0.042309	3.1796	5.45413	2.27453
NQO1	5.47475e-05	0.0763023	3.5445e-05	0.000859621	1.84727	6.82844	4.98117
ROCK2	5.52139e-05	0.000633573	0.000126336	0.106211	3.3074	5.00141	1.69401
ZMPSTE24	5.5342e-05	0.0203263	3.6222e-05	0.0030658	1.09216	3.00148	1.90932
ECI1	5.59462e-05	0.00620504	4.83602e-05	0.00997778	2.28034	4.80185	2.52151
LRBA	5.61074e-05	0.405058	5.30097e-05	0.000173626	0.795007	6.24019	5.44518
PGRMC1	5.68648e-05	0.0206226	3.72354e-05	0.00311008	1.41677	3.89594	2.47916
NFATC2IP	5.70219e-05	0.000237014	0.000237014	0.50787	2.18862	2.57931	0.390689
METTL7B	5.76689e-05	0.00209352	7.24296e-05	0.0316155	2.44612	4.37828	1.93216
RPL12	5.81239e-05	0.00732956	4.42033e-05	0.00732956	1.48077	3.39779	1.91702
PPP2R5A	5.81739e-05	0.0351582	3.70293e-05	0.00190858	1.33269	4.07149	2.7388
MARS	5.82659e-05	0.110518	3.91581e-05	0.000643756	0.979593	4.01938	3.03979
VAPA	5.8878e-05	0.00187641	7.79145e-05	0.0362567	1.42888	2.5123	1.08342
BCL7C	5.91669e-05	0.000194265	0.000194265	0.414445	2.27617	2.7891	0.512928
FAAH	5.95029e-05	0.000280819	0.000257009	0.266243	2.45873	3.24942	0.790689
RPS27L	5.95482e-05	0.00164109	8.39331e-05	0.0422393	2.32894	4.0118	1.68287
EIF4G3	6.01207e-05	0.00733712	4.59029e-05	0.00733712	2.62957	6.01772	3.38815
TXNDC5	6.10191e-05	0.00984287	4.41699e-05	0.00689399	1.38984	3.33348	1.94363
KRAS	6.10433e-05	0.000455309	0.00018288	0.16651	3.7452	5.32431	1.57911
U2SURP	6.13873e-05	0.40761	5.79797e-05	0.00018815	0.515981	4.04491	3.52893
NSDHL	6.17657e-05	0.00683953	4.82555e-05	0.00683953	1.51727	3.41302	1.89576
FRK	6.20911e-05	0.00024303	0.000325769	0.619111	3.26884	3.70104	0.432193
TBCA	6.22732e-05	0.000555146	0.000163981	0.138302	3.42664	5.009	1.58236
MIF	6.28089e-05	0.00861132	4.67181e-05	0.00811413	1.06243	2.48636	1.42393
HDHD3	6.32588e-05	0.000638547	0.000152915	0.121459	2.41752	3.60263	1.18511
MRPL41	6.39435e-05	0.000165353	0.000580887	0.880637	2.09226	2.17299	0.0807355
CERS6	6.4232e-05	0.000264216	0.000264216	0.514674	1.78954	2.10653	0.316993
CENPV	6.4809e-05	0.000381307	0.000229163	0.212388	3.47	4.76181	1.29181
HSPA1A	6.55832e-05	0.0521275	4.18317e-05	0.00148211	0.614525	2.03343	1.4189
SERPINB10	6.56866e-05	0.318481	5.61092e-05	0.000258494	-0.614046	-3.99207	-3.37803
CES2	6.64844e-05	0.000546346	0.000182651	0.150431	4.5809	6.62716	2.04626
LETM1	6.68439e-05	0.007864	5.09853e-05	0.007864	1.54493	3.54362	1.99868
HNRNPU	6.75478e-05	0.0196031	4.49388e-05	0.00390783	0.858068	2.30547	1.4474
VANGL1	6.77723e-05	0.000576799	0.000181015	0.145023	2.00542	2.91861	0.913186
SLC25A13	6.81848e-05	0.488846	7.0042e-05	0.000171968	0.465103	4.30957	3.84447
RPS4Y1	6.83492e-05	0.00120415	0.000117385	0.0677381	2.64707	4.29653	1.64947
TMEM214	6.87151e-05	0.983161	7.69577e-05	7.69577e-05	0.0137809	4.03088	4.0171
ABHD11	6.90377e-05	0.045902	4.4045e-05	0.00176308	1.4275	4.56647	3.13898
RPS13	6.937e-05	0.0027651	8.16533e-05	0.0288518	2.56264	4.69134	2.1287
CAPN5	6.94694e-05	0.00634367	6.18861e-05	0.0123024	2.85299	5.91375	3.06076
SNF8	7.04762e-05	0.000599583	0.000186768	0.145021	2.58148	3.76141	1.17993
GCN1	7.10124e-05	0.548536	7.76361e-05	0.000157908	0.406161	4.31305	3.90689
FH	7.17905e-05	0.00305303	8.20001e-05	0.0270065	1.51214	2.79965	1.28751
BDH1	7.19925e-05	0.000225678	0.000225678	0.413094	3.4869	4.28836	0.801465
DLG1	7.20032e-05	0.00180288	0.000102893	0.0468983	3.27334	5.60669	2.33335
SMARCD3	7.33846e-05	0.000320166	0.000323342	0.557538	1.87661	2.17661	0.3
MRPL18	7.36827e-05	0.000160831	0.000833406	1	1.88629	1.88629	0
KPNA6	7.4341e-05	0.00509305	7.15813e-05	0.0165458	2.07261	4.12912	2.05651
EIF4B	7.45118e-05	0.0335933	4.79839e-05	0.00257086	1.85679	5.51109	3.65429
PMPCA	7.63369e-05	0.00371079	8.22594e-05	0.0235675	2.41487	4.57561	2.16074
MSH2	7.68203e-05	0.00189085	0.000109496	0.0478016	3.07138	5.26256	2.19118
RABAC1	7.84769e-05	0.184623	5.73078e-05	0.000527559	0.730853	3.53678	2.80593
NOL6	7.89231e-05	0.166126	5.64141e-05	0.000587916	1.13923	5.27865	4.13942
RRM2B	7.96214e-05	0.000827932	0.000180389	0.117601	2.69666	4.06809	1.37142
STBD1	8.02016e-05	0.000352049	0.000343738	0.28408	2.65362	3.49215	0.838529
PLEKHA6	8.1137e-05	0.000249157	0.000538181	0.756643	3.84438	4.16137	0.316993
CHCHD2P9	8.18382e-05	0.000567975	0.000242626	0.178554	1.95348	2.77048	0.816993
LGALS4	8.3098e-05	0.00927783	6.89108e-05	0.0101293	3.14826	6.81704	3.66877
BCLAF1	8.39341e-05	0.00851596	6.67489e-05	0.00851596	2.73895	6.10372	3.36476
VDAC2	8.45163e-05	0.0246998	5.58628e-05	0.00393867	0.998759	2.75574	1.75698
CHERP	8.52823e-05	0.064259	5.50041e-05	0.0015832	1.39507	4.76514	3.37007
VGLL4	8.65343e-05	0.000263743	0.000263743	0.405008	2.34595	2.90445	0.558496
TMEM230	8.71279e-05	0.008953	6.68817e-05	0.008953	1.55356	3.55897	2.00541
GPS1	8.7537e-05	0.0644885	5.6494e-05	0.00161985	1.30407	4.44942	3.14535
TM9SF3	8.7574e-05	0.837103	9.6689e-05	9.6689e-05	-0.0733978	2.12178	2.19518
API5	8.82916e-05	0.0839263	5.77877e-05	0.00126901	1.11318	4.07563	2.96245
MMP8	8.87954e-05	0.000328539	0.000328539	0.500161	-4.24403	-5.04565	-0.801616
PTBP1	8.88422e-05	0.0351564	5.75582e-05	0.00294636	1.44436	4.26912	2.82475
AHCY	8.9019e-05	0.0137616	6.33773e-05	0.00736334	1.70527	4.19915	2.49388
RPS15	8.91558e-05	0.000940185	0.000195769	0.115809	3.1982	4.8543	1.65609
NFS1	8.94457e-05	0.000420024	0.000352761	0.264783	2.90184	3.87326	0.971425
HIBADH	8.95805e-05	0.0219336	6.00977e-05	0.0046944	1.32796	3.56304	2.23508
MCAT	9.01902e-05	0.00129483	0.000164677	0.0840278	2.34167	3.72685	1.38517
ARFIP1	9.0712e-05	0.0453577	5.83873e-05	0.00235451	1.10605	3.45432	2.34826
GTF2I	9.14025e-05	0.0268107	6.03019e-05	0.00394288	1.97131	5.49424	3.52293
ATAD3A	9.18217e-05	0.0727205	5.9609e-05	0.00151456	1.24235	4.35884	3.11649
INF2	9.27217e-05	0.0164724	6.45398e-05	0.00643692	1.65826	4.20384	2.54558
PSMD13	9.41039e-05	0.36196	8.34033e-05	0.000321294	0.382494	2.64434	2.26184
EIF1	9.45338e-05	0.0181592	6.50674e-05	0.0059686	1.20148	3.09634	1.89486
CIAPIN1	9.51948e-05	0.000618649	0.00028657	0.190421	3.36613	4.7463	1.38017
ARMC10	9.5917e-05	0.030282	6.29e-05	0.00368146	1.54686	4.40294	2.85608
MSH6	9.59922e-05	0.000393645	0.000422046	0.583508	3.80178	4.37992	0.578136
UBFD1	9.65703e-05	0.000334097	0.000334097	0.479657	2.49584	2.99584	0.5
XPNPEP1	9.66011e-05	0.00993969	8.05529e-05	0.0110763	2.01972	4.36344	2.34372
SRSF9	9.69213e-05	0.116783	6.54982e-05	0.0010132	0.855833	3.44051	2.58467
VARS	9.69262e-05	0.0709846	6.29083e-05	0.00163667	1.4544	5.04869	3.59429
PDXDC2P	9.81768e-05	0.00266216	0.000128748	0.0434011	2.532	4.45192	1.91992
IDE	9.84202e-05	0.0525446	6.34642e-05	0.00221983	1.1671	3.7495	2.5824
HSPA1L	9.92803e-05	0.141481	6.8871e-05	0.000861632	0.391294	1.67717	1.28588
PPA1	9.96086e-05	0.00756984	8.98281e-05	0.0150665	1.20554	2.48619	1.28065
KPNA2	0.000101663	0.0184132	7.02739e-05	0.00634793	1.82121	4.6773	2.85609
RBM14	0.000102169	0.108786	6.84929e-05	0.00114338	0.821506	3.2148	2.39329
OXA1L	0.000103094	0.00238992	0.000143984	0.0510971	2.82605	4.86365	2.0376
SBDS	0.000105309	0.000346066	0.000591704	0.70645	3.45922	3.81592	0.356704
NDUFS2	0.000105324	0.227165	8.02749e-05	0.000573745	0.682593	3.54788	2.86529
ISOC2	0.000105871	0.0175445	7.39132e-05	0.00694144	1.58862	4.02957	2.44095
KPNA3	0.000105872	0.0542684	6.84256e-05	0.00231651	0.970278	3.12363	2.15335
PTBP3	0.00010701	0.00122343	0.000215754	0.106373	2.88067	4.45695	1.57627
TTLL12	0.000110048	0.0729579	7.16729e-05	0.0018105	0.99986	3.46195	2.46209
ELMO3	0.000110608	0.000371169	0.000371169	0.479588	3.80537	4.5768	0.771425
CYC1	0.000111163	0.0120635	8.28586e-05	0.0105705	1.01212	2.38931	1.37718
COPS8	0.000111926	0.00330617	0.000138605	0.039808	2.10018	3.76559	1.66542
SUCLG2	0.000112099	0.00835465	0.000100316	0.0154348	1.3921	2.88496	1.49286
NAXE	0.000112125	0.00114351	0.000240158	0.119641	3.00034	4.56826	1.56792
GSTT1	0.000112964	0.00028055	0.000914689	0.888633	3.11109	3.22808	0.116993
MRPL1	0.00011344	0.0003655	0.0003655	0.464927	2.52565	3.05784	0.532193
RAB2A	0.000113767	0.368641	0.000100973	0.000378589	0.317834	2.19559	1.87775
EEF1G	0.000114285	0.240999	8.83018e-05	0.000585717	0.285815	1.52027	1.23446
PPIH	0.000115421	0.000443697	0.000443697	0.320289	2.97853	3.86922	0.890689
NAA11	0.000115545	0.000267428	0.00103319	0.938599	2.01487	2.05638	0.0415037
CCAR2	0.00011584	0.0765704	7.56805e-05	0.00181902	1.00116	3.49824	2.49708
PPP4R3A	0.000116165	0.220736	8.77507e-05	0.000649533	0.878592	4.4705	3.5919
BPI	0.000116452	0.000437378	0.000538108	0.626124	-3.86209	-4.38845	-0.526365
ABHD13	0.000117775	0.000541204	0.000443207	0.268463	1.41306	1.89379	0.480735
VBP1	0.000117812	0.0623671	7.64828e-05	0.00225559	0.910979	3.01074	2.09976
RPRD1A	0.000118872	0.00205898	0.000186744	0.0691811	2.4707	4.09322	1.62252
NUP85	0.000119026	0.684872	0.00014756	0.000201532	0.315743	4.72125	4.40551
NGDN	0.000119815	0.000335264	0.000803037	0.804596	2.34841	2.5069	0.158496
MYH14	0.000120787	0.00256117	0.000171318	0.0561234	1.49888	2.56363	1.06475
WASL	0.000121182	0.000308426	0.000926067	0.868809	2.23617	2.33617	0.1
RPN1	0.000122279	0.215223	9.17312e-05	0.000700232	0.375161	1.87888	1.50372
DCXR	0.000124498	0.00356663	0.000153626	0.0411506	2.63464	4.72757	2.09293
GSDMB	0.000124604	0.000958574	0.000313825	0.159507	3.5815	5.23452	1.65302
PSMD2	0.000126399	0.212932	9.45332e-05	0.000730957	0.440382	2.18898	1.74859
PSMD6	0.000126562	0.0583663	8.22656e-05	0.00258448	0.708474	2.28942	1.58095
SLC27A4	0.000126704	0.00576391	0.000130575	0.0256059	2.49728	4.82171	2.32442
PGAM5	0.000127215	0.000440476	0.000440476	0.506319	3.43421	4.09271	0.658496
SLC25A18	0.000129536	0.000621977	0.000459709	0.25629	1.86025	2.51874	0.658496
CXADR	0.000134876	0.0118831	0.000103153	0.0118831	2.28325	5.28547	3.00221
PABPC1L	0.000136482	0.0774367	8.94823e-05	0.00211957	0.892299	3.08717	2.19488
HGH1	0.000138024	0.00318861	0.000184032	0.0514193	1.99515	3.48057	1.48542
RPS16	0.000138595	0.00738925	0.000133868	0.0218267	1.98962	3.96238	1.97276
UGDH	0.000139928	0.282383	0.000112584	0.000607716	1.15617	6.59657	5.4404
EMC7	0.000141298	0.00548455	0.00015184	0.0301859	2.02637	3.84032	1.81395
SCFD2	0.000142074	0.0118178	0.00012029	0.0139248	1.85293	3.97748	2.12455
KLF5	0.000143469	0.000484543	0.000711049	0.681048	2.73395	3.05095	0.316993
RPS3A	0.000143596	0.0171702	0.000103484	0.00970807	1.53087	3.76811	2.23724
NDC1	0.000149909	0.0430862	9.86598e-05	0.00411552	1.5191	4.50265	2.98355
VIMP	0.000150169	0.0343216	0.00010017	0.00514656	1.05026	2.95896	1.9087
RPL10A	0.000151115	0.0157594	0.00011105	0.0111373	1.22666	2.95831	1.73166
MPC2	0.00015115	0.209713	0.000112347	0.00088342	0.585478	2.84992	2.26445
XPO7	0.000151269	0.674971	0.000183833	0.000257431	0.251349	3.57214	3.32079
PSMD1	0.000151784	0.0197344	0.000107664	0.00895645	1.07619	2.70679	1.6306
TOMM22	0.000151909	0.323141	0.000127399	0.000573225	0.445752	2.74543	2.29967
DDX20	0.00015319	0.0814953	0.00166009	0.000103199	-1.00039	2.5258	3.52619
HSPA9	0.000154619	0.0754123	0.00010154	0.00246297	0.730962	2.48561	1.75465
EXOC8	0.000155177	0.00073813	0.000531718	0.2573	3.08656	4.19528	1.10872
IPO7	0.000155537	0.125846	0.000106104	0.00150379	0.788348	3.13177	2.34342
MLPH	0.000156996	0.000459732	0.000459732	0.411599	4.36598	5.44445	1.07846
SLC25A46	0.000157613	0.000782397	0.000520026	0.246533	2.56647	3.51565	0.949185
UGT1A7	0.000158353	0.00653656	0.000163845	0.0284044	2.329	4.48852	2.15951
HADH	0.000158874	0.0167205	0.000116189	0.0110567	1.03223	2.50593	1.47369
IMPA1	0.000160503	0.000484683	0.000484683	0.47041	3.05286	3.70715	0.654291
NDUFA8	0.000161102	0.000542533	0.000542533	0.359925	2.65082	3.39388	0.743063
UGT1A6	0.000161774	0.0585375	0.000105999	0.00329692	1.9316	6.12357	4.19197
ENOPH1	0.000161991	0.000459343	0.000459343	0.423764	3.04485	3.77724	0.732388
DHRS7B	0.00016319	0.00194619	0.000295726	0.101466	2.86	4.53034	1.67035
AK4	0.00016323	0.00261247	0.000252307	0.0750313	2.36765	3.93034	1.56268
IMMT	0.000163619	0.0148059	0.000122673	0.0128576	1.04259	2.46823	1.42564
COG4	0.000165523	0.0354382	0.000110799	0.00550482	1.75901	4.94978	3.19077
TFAM	0.000166887	0.000855972	0.000529498	0.238254	3.20049	4.41672	1.21623
NOP2	0.000167251	0.366559	0.00014646	0.000551812	0.659493	4.40289	3.7434
HSPE1-MOB4	0.000168122	0.0128097	0.000130126	0.0128097	1.94979	4.48507	2.53528
RB1	0.00016971	0.0013212	0.000396965	0.156635	2.9255	4.33167	1.40617
CCT2	0.00017216	0.0117399	0.000137127	0.0117399	1.16396	2.61587	1.45191
VPS28	0.000173678	0.00942656	0.000162236	0.0215427	2.12113	4.30171	2.18058
LGALS3	0.000173816	0.00702687	0.000178888	0.0290568	1.9384	3.74497	1.80657
MPZL1	0.000175058	0.146312	0.000121777	0.00145673	0.94039	3.90371	2.96332
H2AFX	0.000175213	0.00235019	0.000293404	0.0898935	3.15746	5.11228	1.95482
MIPEP	0.000175373	0.000673413	0.000673413	0.584545	3.35591	3.89166	0.535755
POR	0.000177536	0.132356	0.000121888	0.00163014	1.00997	4.03983	3.02986
SRSF4	0.000179326	0.00439166	0.000223364	0.048499	2.14783	3.83365	1.68582
UBE2G2	0.00017976	0.00178592	0.000355826	0.122125	1.84398	2.8476	1.00362
BCS1L	0.000180279	0.895472	0.000216319	0.000216319	0.0901257	3.9566	3.86647
FKBP3	0.000180338	0.000613968	0.000613968	0.354702	2.95275	3.79973	0.846983
UQCR10	0.000181227	0.339671	0.000153955	0.000645296	0.52097	3.27231	2.75134
NDUFA2	0.000186458	0.00784773	0.000187461	0.0279185	1.51726	2.96418	1.44691
TNPO2	0.000186544	0.134093	0.000128293	0.00168952	1.01639	4.06797	3.05158
DNAJB12	0.000187042	0.000631175	0.000631175	0.35724	3.15005	4.0512	0.901156
AAAS	0.000188888	0.134497	0.000129958	0.0017053	1.17079	4.68617	3.51539
AARS2	0.000190388	0.00053867	0.00053867	0.421951	2.56356	3.1921	0.62854
FAM129B	0.000191048	0.00185563	0.000378702	0.124841	2.44402	3.7697	1.32568
FLI1	0.000192443	0.337317	0.000162832	0.000688625	-0.581883	-3.62023	-3.03835
UGT1A1	0.000193029	0.00125581	0.000496561	0.187145	3.47587	5.01875	1.54288
ZNF326	0.000193878	0.00225976	0.000344264	0.103656	2.79064	4.43689	1.64624
WDR55	0.000194983	0.000536256	0.00115228	0.799343	2.19295	2.35145	0.158496
NDUFA9	0.000195012	0.0417555	0.000130327	0.00553113	0.867795	2.4982	1.63041
BCAS1	0.000197009	0.00345004	0.000281609	0.0683634	3.60708	6.12998	2.5229
MRPL44	0.000197906	0.101777	0.000132612	0.00234783	0.965261	3.5106	2.54534
CDS1	0.000199194	0.0147682	0.000152937	0.0147682	1.23699	2.87566	1.63867
LGALS3BP	0.000199534	0.0183468	0.000147134	0.0127299	1.67995	4.06751	2.38756
AIMP2	0.00020024	0.126388	0.000136819	0.00191991	1.07733	4.20012	3.12279
BAG3	0.000201019	0.000274482	0.00384686	0.663027	3.71654	3.28164	-0.434895
MYO5B	0.000203382	0.00127994	0.000529459	0.193209	3.67445	5.2857	1.61124
TSN	0.00020396	0.160279	0.000143766	0.00154589	0.572607	2.43037	1.85776
CDH17	0.0002075	0.00173278	0.000444315	0.145281	3.88234	5.86044	1.9781
RAB1A	0.000207632	0.0698408	0.000137227	0.00355986	0.666695	2.16749	1.50079
HDGFRP2	0.000207887	0.000649709	0.000649709	0.51028	3.11233	3.72933	0.616993
EMC4	0.000207992	0.00569025	0.0002417	0.0433343	2.53845	4.65172	2.11327
TNFRSF10B	0.000208063	0.00019422	0.0105394	0.342658	2.54086	1.90688	-0.633985
CCT7	0.000208822	0.0235575	0.000148704	0.0104082	1.12636	2.85253	1.72617
PPP2R5D	0.000209886	0.124676	0.000143247	0.0020379	0.923729	3.57091	2.64718
NCL	0.000209946	0.0135312	0.000169459	0.0135312	1.11488	2.48725	1.37237
RQCD1	0.00021095	0.0453384	0.000140914	0.0055212	1.38783	4.04497	2.65714
ATPAF2	0.000213609	0.00447442	0.000276987	0.056912	2.16796	3.80891	1.64095
DKFZp686L22104	0.000214263	0.00228686	0.000392431	0.113211	2.07029	3.2587	1.18842
CCT8	0.000214512	0.00996136	0.000205006	0.0253155	1.30686	2.6203	1.31345
SEC23B	0.000214944	0.0537112	0.000142673	0.00476499	1.21328	3.67705	2.46377
MTCH1	0.000215183	0.0134905	0.000173151	0.0134905	2.1645	4.8424	2.6779
PREB	0.000219389	0.00189427	0.000454601	0.140292	3.0531	4.64474	1.59164
EIF4G2	0.000220078	0.424619	0.000203094	0.000614665	0.432302	3.18391	2.75161
COASY	0.000221065	0.015374	0.000170522	0.015374	1.73144	4.01681	2.28537
SUCLA2	0.000221219	0.0146589	0.000181023	0.0146589	1.40636	3.10727	1.70091
GOSR2	0.000221841	0.136166	0.000152951	0.00197238	1.01366	4.02225	3.00859
DSP	0.000222796	0.015233	0.000189459	0.0171463	3.57451	7.68528	4.11077
LMAN2	0.000224358	0.0188361	0.000166782	0.0139727	1.15257	2.77528	1.62271
NCOA5	0.000226774	0.000918442	0.00080919	0.297469	2.3691	3.16739	0.798299
RRM2	0.000229029	0.00476337	0.00029451	0.0573163	3.09511	5.45215	2.35705
EIF5B	0.000229395	0.0131912	0.000203867	0.0204183	2.53426	5.29773	2.76347
CCDC58	0.000229852	0.398622	0.000206244	0.000685349	0.378192	2.62918	2.25099
VAPB	0.000231008	0.00312694	0.000365543	0.0887989	2.50758	4.11828	1.6107
AKT1S1	0.000234965	0.000822228	0.000963929	0.646456	2.54653	2.89247	0.345943
RPL10L	0.000235072	0.00322757	0.000368001	0.0875022	1.72837	2.8476	1.11923
DNTTIP2	0.000239845	0.00081123	0.00101906	0.665195	3.05292	3.44361	0.390689
TXN	0.000240052	0.00325007	0.000377101	0.088736	1.14702	1.88733	0.740315
FMR1	0.00024016	0.000597971	0.00152714	0.858927	3.10671	3.2652	0.158496
YWHAQ	0.00024214	0.0374442	0.000165355	0.00765124	0.616655	1.70014	1.08349
BAG6	0.000245324	0.120838	0.000167155	0.00244948	1.02246	3.86136	2.8389
CASP6	0.000246894	0.000505189	0.00209119	1	2.81867	2.81867	0
ERMP1	0.000249705	0.0106627	0.000240487	0.0276008	2.85124	5.69665	2.84541
MICU1	0.00025099	0.000581724	0.00174615	0.907585	3.00928	3.10928	0.1
HRAS	0.000252473	0.00502505	0.000325797	0.0599157	2.46256	4.32973	1.86718
BCL2L15	0.000253473	0.00158221	0.0006317	0.193589	2.34907	3.40182	1.05275
ATP2A2	0.000253685	0.689921	0.000307116	0.000409999	0.189576	2.71287	2.52329
SF3B2	0.000256949	0.00701842	0.000289329	0.0434211	1.22581	2.27449	1.04868
IMPAD1	0.000257548	0.00914095	0.00026295	0.0332885	1.80639	3.50412	1.69773
FAF1	0.000257642	0.0012843	0.00075461	0.241745	2.92807	4.07949	1.15142
ABCB7	0.000259435	0.000905394	0.000905394	0.341644	3.7488	4.89774	1.14894
RPS7	0.000261527	0.00804605	0.000280604	0.0384808	1.12117	2.12488	1.00371
AKAP8	0.00026433	0.00065974	0.00162459	0.85371	3.02249	3.1839	0.161411
ENSA	0.000265658	0.000797644	0.00127035	0.732997	2.26669	2.49482	0.228129
COX20	0.000265791	0.117933	0.000180884	0.00271421	0.87578	3.25895	2.38317
EFTUD2	0.000269117	0.0183016	0.000205346	0.0172898	1.05179	2.47688	1.42508
ST13	0.000270077	0.0304651	0.000190088	0.0104649	1.00341	2.61935	1.61594
NUP107	0.000270099	0.385384	0.000238042	0.00082897	0.592899	3.95866	3.36576
SAR1A	0.000272197	0.00184482	0.00063079	0.177978	2.03132	2.99187	0.960549
DNAJB1	0.000273024	0.00947942	0.000278669	0.0340454	2.26981	4.40401	2.1342
STX5	0.000274348	0.00348813	0.000434529	0.0944044	2.97732	4.87957	1.90225
CIB1	0.000274804	0.0198849	0.000206918	0.0162589	1.70903	4.08233	2.3733
GPKOW	0.000276548	0.00680865	0.000321005	0.0482453	2.14427	3.92744	1.78317
FIS1	0.000277315	0.224736	0.000207743	0.001485	0.497641	2.38359	1.88595
DDX56	0.000279442	0.00912199	0.000290613	0.0362412	2.2125	4.25435	2.04184
TFG	0.000282581	0.0149344	0.000226455	0.0149344	1.95552	4.40966	2.45414
B4GALT1	0.000284775	0.0041945	0.000415172	0.0812724	2.4284	4.0869	1.6585
MLH1	0.000286551	0.000846983	0.00136605	0.740234	2.36075	2.59294	0.232193
ISOC1	0.000286964	0.0144584	0.000258199	0.0233815	1.86691	3.88006	2.01315
PYCRL	0.000289764	0.00303375	0.000505448	0.114798	2.46399	3.91868	1.45469
CAMP	0.000291022	0.00166973	0.000746355	0.209602	-2.41019	-3.45738	-1.04719
METTL1	0.000291911	0.00202069	0.000656734	0.173919	1.81498	2.69047	0.875489
PON2	0.000292663	0.369071	0.000253169	0.000937041	0.756388	4.85234	4.09595
CGN	0.000299194	0.0154245	0.000240623	0.0154245	2.496	5.61772	3.12172
UQCRB	0.000300921	0.00446459	0.000432786	0.080615	2.25867	3.81687	1.55819
OCIAD1	0.000301542	0.0318784	0.000213008	0.0111754	1.3873	3.62086	2.23357
ABHD17C	0.000302681	0.000956502	0.000956502	0.553627	2.89096	3.4195	0.52854
NOLC1	0.000302717	0.137202	0.000209331	0.00265276	0.870696	3.37639	2.50569
HNRNPCL1	0.000303845	0.251619	0.000233467	0.00144568	0.567552	2.85593	2.28838
COG2	0.00030422	0.0354574	0.000212385	0.0101482	1.67194	4.46303	2.79109
HSP90AA1	0.000307045	0.0633292	0.000206151	0.00577805	0.481279	1.47496	0.993677
PTGES3	0.000309236	0.0490636	0.000210089	0.00748451	1.09092	3.13431	2.04339
SRSF7	0.000309327	0.00255486	0.000613266	0.145525	1.77446	2.71828	0.943815
ILVBL	0.000310197	0.00393185	0.000480836	0.0945033	3.4028	5.60805	2.20525
HSP90AA5P	0.000314358	0.112802	0.000213757	0.00334331	0.808781	2.92445	2.11567
CLMN	0.000315728	0.000947093	0.000947093	0.391255	3.2697	4.17563	0.905926
STK25	0.000316367	0.00141851	0.000957902	0.266235	2.33703	3.21776	0.880735
SAP30BP	0.000316472	0.00290614	0.000585427	0.130759	2.38776	3.72867	1.34091
TSTA3	0.00031958	0.0333028	0.000225635	0.0113428	1.5098	3.95737	2.44758
TTC1	0.000321184	0.00229876	0.000692189	0.167767	2.41501	3.61483	1.19982
CUL4A	0.000321574	0.131692	0.000221574	0.00293106	0.805024	3.06115	2.25613
PIGO	0.000322651	0.0282773	0.000233059	0.0134676	1.56122	3.94742	2.3862
SYF2	0.000324523	0.000803657	0.00188831	0.851445	1.81031	1.91031	0.1
ACIN1	0.00033289	0.00532776	0.000453197	0.0745506	2.81717	4.84862	2.03146
GATC	0.00033464	0.00206515	0.000789709	0.194151	1.71555	2.50624	0.790689
PSMD7	0.000334774	0.0973311	0.000226115	0.00411565	1.09089	3.74515	2.65426
UBXN4	0.000335067	0.00615675	0.000427407	0.064817	2.33221	4.11132	1.77911
HSP90AB1	0.000335525	0.117284	0.000229048	0.00342825	0.432707	1.57601	1.14331
PEX16	0.000337448	0.0536495	0.000229185	0.00747309	1.42304	4.14676	2.72371
CHCHD3	0.000337738	0.0260711	0.000248132	0.0152828	1.43406	3.54971	2.11566
GALNT4	0.000338474	0.0127746	0.000326299	0.0313	2.61285	5.22386	2.61101
AP3S1	0.000339667	0.00258908	0.000694383	0.157297	2.21096	3.35381	1.14285
ALG9	0.000340632	0.018105	0.000280985	0.018105	1.85078	4.09086	2.24008
NELFA	0.000340648	0.00793861	0.00039143	0.0509467	2.68577	4.93697	2.2512
KPNA4	0.00034181	0.0180284	0.000269517	0.0180284	1.43683	3.29849	1.86166
SMDT1	0.000343592	0.0185478	0.000269468	0.0185478	1.19491	2.75703	1.56211
CPNE3	0.000346426	0.00654546	0.000433989	0.0629879	1.58833	2.81892	1.23059
TMEM189	0.000350612	0.00294939	0.000669487	0.14241	1.84058	2.84419	1.00362
ACAD9	0.000351827	0.315941	0.000287398	0.00131581	0.566115	3.21093	2.64481
POLR1C	0.000351833	0.0126595	0.00034282	0.0328426	2.17546	4.32502	2.14956
ALDH3A2	0.000352226	0.0159761	0.000319085	0.0260105	2.01488	4.17697	2.16209
LNP	0.000353501	0.00133489	0.00119738	0.312973	2.93652	3.93198	0.995461
IGFBP2	0.000357659	0.000851113	0.00213411	0.875312	2.51447	2.63147	0.116993
CCDC12	0.000358298	0.000912263	0.00194294	0.828948	1.55044	1.65044	0.1
CCDC25	0.000358773	0.00112044	0.00112044	0.374697	2.94394	3.80375	0.859805
ARF4	0.000360516	0.262066	0.000279231	0.00163479	0.426532	2.16243	1.7359
KRT18	0.000362271	0.231952	0.000272585	0.00186127	0.469781	2.2349	1.76512
PCDH1	0.000362685	0.00229592	0.000825988	0.188834	2.73099	4.02075	1.28976
LBR	0.000363018	0.00374151	0.000610948	0.116053	1.59037	2.54967	0.959304
WDR36	0.000363102	0.0270713	0.000267124	0.0158278	1.69328	4.19609	2.50281
LCLAT1	0.000363663	0.0093421	0.000398045	0.0461433	2.29736	4.3135	2.01615
ERLIN1	0.00036421	0.0126081	0.000357852	0.0341443	1.50689	2.98291	1.47602
CPT1A	0.00036715	0.0421197	0.000255393	0.0103225	1.61739	4.41391	2.79652
ZFPL1	0.000367644	0.842869	0.000381124	0.000381124	-0.129229	3.43692	3.56615
USE1	0.000370798	0.00394053	0.000610888	0.112478	2.69126	4.34205	1.65079
EPRS	0.000377074	0.00936106	0.000415962	0.0477506	1.83204	3.42754	1.5955
DIABLO	0.000377886	0.0544761	0.000258098	0.00823398	1.41697	4.10328	2.6863
AKR7A3	0.000381722	0.00235015	0.000875901	0.193778	2.94335	4.32107	1.37773
NOC4L	0.000384357	0.0341094	0.000274874	0.0133162	1.80748	4.68286	2.87538
RINT1	0.000386022	0.00176744	0.00109582	0.258954	2.28984	3.18757	0.897728
CTNNA2	0.000388405	0.0203435	0.000334155	0.022511	2.40623	5.16569	2.75947
SVIP	0.000390491	0.00262861	0.000839487	0.177262	1.4543	2.17129	0.716993
CNNM4	0.000391942	0.00110461	0.00110461	0.410963	2.40644	3.05562	0.649185
MRPS34	0.00039406	0.00203941	0.00101522	0.229613	2.15918	3.07617	0.916993
MPST	0.00039556	0.0522794	0.000271635	0.00897304	1.40256	4.00378	2.60122
AZU1	0.000396478	0.00966324	0.000437184	0.0486233	-2.03271	-3.80344	-1.77073
ATP2C1	0.000397924	0.016726	0.000363429	0.0280756	2.67228	5.51762	2.84533
FAF2	0.00040061	0.11982	0.000274787	0.0039901	0.791437	2.85937	2.06793
CPD	0.000402347	0.0251376	0.000303045	0.0188784	2.49327	6.02503	3.53176
ACYP1	0.000402373	0.00119768	0.00119768	0.39008	1.5434	1.98263	0.439232
RRP1	0.000402964	0.328729	0.000332486	0.00143748	0.473584	2.72536	2.25178
SUDS3	0.000406549	0.000809411	0.00304028	1	1.91401	1.91401	0
MTCH2	0.000407204	0.0981452	0.000276596	0.00494506	1.13184	3.83016	2.69831
NPEPPS	0.000407393	0.0915694	0.000276223	0.0053002	1.04838	3.47381	2.42543
NUDCD3	0.000409913	0.00427825	0.000668789	0.114263	1.92782	3.11616	1.18833
GOLPH3	0.000410995	0.0296126	0.000301852	0.0163816	1.49975	3.74426	2.24451
HNRNPC	0.000413129	0.0711346	0.000280365	0.00690317	1.08167	3.33115	2.24948
PPP2R1B	0.000413177	0.0143552	0.000398772	0.0339994	2.19133	4.38234	2.19101
KIF11	0.000416133	0.00114302	0.00194256	0.773805	2.94746	3.20595	0.258496
MTDH	0.000419008	0.0085375	0.0004925	0.05822	1.97276	3.58938	1.61662
ANXA10	0.000419574	0.0218885	0.000355419	0.0218885	2.59033	5.62945	3.03913
MRPS16	0.000419859	0.000439724	0.0114625	0.465235	2.03356	1.61657	-0.416993
CLTB	0.000424674	0.00152049	0.00143598	0.326874	2.97423	3.96702	0.992796
PPP2R1A	0.000426158	0.0203115	0.000337074	0.0203115	0.861196	1.98148	1.12028
FAM3A	0.000426162	0.0189267	0.000342362	0.0189267	1.56095	3.54125	1.9803
TXNDC17	0.000430049	0.000914803	0.00284817	0.948304	3.26093	3.32403	0.063105
DNPEP	0.00043196	0.0193238	0.00035375	0.0193238	1.96176	4.37959	2.41783
MRPL49	0.000434782	0.192178	0.000315266	0.0026875	0.651313	2.7964	2.14509
LSM14B	0.000435864	0.0013339	0.0013339	0.378749	2.47049	3.19903	0.72854
COG8	0.000437893	0.0226469	0.000373208	0.0227936	1.85789	4.02206	2.16418
SNAP23	0.000441472	0.0790572	0.000299972	0.00663505	0.726308	2.2897	1.56339
CCT4	0.000444813	0.0474877	0.000310231	0.0110843	0.988847	2.7281	1.73925
LMAN1	0.000452111	0.116283	0.000310311	0.00462533	0.557138	1.97198	1.41484
PCYOX1	0.000458204	0.174232	0.000327338	0.00312222	1.02823	4.21685	3.18862
G3BP2	0.000461278	0.0291134	0.000343785	0.0186872	2.03111	4.99732	2.9662
NUP54	0.000461487	0.0225117	0.000360864	0.0225117	1.62418	3.78614	2.16196
ATP5A1	0.000461726	0.0100855	0.000519398	0.0542024	0.893676	1.65683	0.76315
RAB11B	0.000461862	0.277073	0.00036178	0.00195784	0.62053	3.17737	2.55684
TRA2A	0.000464362	0.0013983	0.0013983	0.577395	2.80677	3.30677	0.5
FAM162A	0.000464402	0.00901793	0.00054784	0.0610185	2.08236	3.78163	1.69927
CD55	0.000464696	0.00481201	0.000742882	0.114798	3.25718	5.29154	2.03436
FUS	0.000473486	0.074976	0.00032298	0.00749065	0.948732	2.92836	1.97962
ORC2	0.000474677	0.0279013	0.000357466	0.0200582	1.39094	3.38191	1.99097
DPY19L1	0.000475245	0.380176	0.00114596	0.0004493	-0.538154	2.8781	3.41625
RAB27B	0.000478504	0.0195497	0.00038772	0.0195497	1.7252	3.89438	2.16918
ASL	0.000479926	0.03603	0.000347601	0.015721	1.97896	5.08357	3.10461
ESYT2	0.000480226	0.0233189	0.000412114	0.024269	2.2481	4.84883	2.60073
RAB6A	0.000483447	0.037664	0.000348297	0.0151518	1.25084	3.24337	1.99254
PGRMC2	0.000483502	0.0179792	0.000447615	0.0317176	1.24443	2.55221	1.30778
INPP4B	0.000486115	0.00124891	0.00124891	0.443453	3.35331	4.20655	0.85325
LPCAT1	0.000487879	0.0340634	0.000356756	0.0168966	1.40494	3.55839	2.15345
TNPO1	0.000489951	0.320642	0.000399712	0.00177882	0.631125	3.51378	2.88266
GSDMD	0.000490781	0.0166807	0.00046653	0.0347105	2.12383	4.28822	2.16438
AARS	0.000497713	0.0837748	0.000339743	0.00704379	1.20285	3.81427	2.61141
GNE	0.000498538	0.000981422	0.00354004	1	3.27998	3.27998	0
TMPRSS4	0.000498782	0.00108285	0.00304863	0.927456	3.40786	3.50197	0.0941106
LMF2	0.00050076	0.0162979	0.00048151	0.0362482	2.03974	4.09183	2.05209
EMC3	0.000502151	0.00907668	0.000602999	0.0654924	2.29547	4.13641	1.84094
RNF114	0.000502529	0.00135908	0.00135908	0.53681	1.94549	2.33618	0.390689
LARS	0.00050372	0.184126	0.000362925	0.00323509	0.714777	2.97491	2.26013
HIST1H2AA	0.000510682	0.00484069	0.000841586	0.125078	2.24322	3.60488	1.36166
ATP5F1	0.000511523	0.171329	0.000364849	0.00353209	0.825189	3.32901	2.50382
MAVS	0.000512444	0.0208164	0.000458808	0.0290092	1.69514	3.55313	1.85799
TMTC3	0.000513288	0.00805584	0.000653841	0.0754541	2.0504	3.60727	1.55687
KCMF1	0.000518965	0.00432085	0.000918766	0.142256	1.70051	2.67193	0.971425
ARL1	0.000520472	0.47694	0.000493991	0.00123066	0.330562	2.53572	2.20516
ATP6AP2	0.000520815	0.00677926	0.000723231	0.0910165	3.03996	5.17632	2.13636
STT3A	0.000521766	0.827252	0.000545036	0.000545036	-0.0847228	1.97852	2.06324
CAMK2B	0.000526073	0.0151784	0.000523311	0.0408886	1.99203	3.92259	1.93056
ACY1	0.000527568	0.00121949	0.00288867	0.880584	3.6093	3.77569	0.166391
ETHE1	0.000527961	0.00174054	0.00182321	0.656132	1.70938	1.95179	0.242417
SMPDL3B	0.000529214	0.00201147	0.0016103	0.305936	2.56115	3.48258	0.921432
VKORC1L1	0.000529602	0.0421677	0.000379157	0.0148176	1.19645	3.15711	1.96066
ISYNA1	0.000529883	0.00167913	0.00191615	0.67863	3.28788	3.72007	0.432193
TOMM70	0.000530985	0.495894	0.000513261	0.00120149	0.37987	3.03451	2.65464
RPL30	0.000535734	0.0672703	0.00036911	0.00941728	1.10533	3.27515	2.16982
TNKS1BP1	0.000538073	0.00299167	0.00122495	0.211624	2.78855	4.07694	1.28839
MAK16	0.000539027	0.00105654	0.00375193	1	2.19173	2.19173	0
DKC1	0.000542066	0.0703393	0.000372994	0.00911258	1.43297	4.29289	2.85991
MRPS27	0.000542468	0.495113	0.000991632	0.000581344	-0.450302	3.15528	3.60558
CERS2	0.000545976	0.00815742	0.000703803	0.0791686	2.38863	4.18121	1.79258
NUP155	0.000549417	0.293982	0.000436326	0.00217356	0.657488	3.43322	2.77574
MYO1C	0.000558284	0.0112746	0.000629197	0.0584659	2.8866	5.34521	2.45861
YTHDF3	0.000558873	0.00246711	0.00149134	0.264402	2.35971	3.3089	0.949185
RRP15	0.00055992	0.00109518	0.00385957	1	2.27287	2.27287	0
HNRNPA1	0.000561487	0.0483404	0.000397783	0.0137005	0.787045	2.13394	1.3469
CLCC1	0.000564843	0.0343508	0.000418549	0.0193661	1.84186	4.60848	2.76662
ATP2A1	0.000565628	0.512101	0.000554628	0.00123101	0.291411	2.40218	2.11077
BET1	0.00056735	0.0719842	0.000390989	0.00931139	0.973872	2.92376	1.94989
HNRNPA2B1	0.000569681	0.0453396	0.000406874	0.0148126	0.670507	1.78758	1.11708
SAMD1	0.000571662	0.00111686	0.00391958	1	1.65673	1.65673	0
MRPS17	0.000573823	0.00138306	0.00138306	0.499119	1.47816	1.81036	0.332193
AFDN	0.000575042	0.0095327	0.000701012	0.0712422	3.06908	5.49267	2.42359
LPP	0.000576677	0.0386503	0.000420757	0.0175747	1.65003	4.23218	2.58214
PPIF	0.00057929	0.00754302	0.000788801	0.090742	2.15792	3.6978	1.53987
RAB6B	0.00057984	0.0244567	0.000458802	0.0244567	1.45952	3.38395	1.92443
REXO2	0.000579936	0.0199975	0.000537317	0.0341422	1.77027	3.63444	1.86417
DKFZp434B2017	0.000588222	0.00753785	0.000804993	0.0921691	1.87847	3.21254	1.33407
TMEM259	0.000591395	0.00904871	0.000743671	0.0771569	1.77614	3.13825	1.36211
NCLN	0.000591545	0.0999306	0.000406906	0.00699083	0.881098	2.90014	2.01904
PNPT1	0.000592955	0.0541112	0.000417271	0.0129191	1.76975	4.90895	3.1392
RTF1	0.000605832	0.00117981	0.00409234	1	2.35954	2.35954	0
YIPF6	0.000607157	0.0229127	0.000544485	0.0311691	1.21753	2.55417	1.33663
AKR1C3	0.000610321	0.0349157	0.00045468	0.020565	2.79934	6.97714	4.1778
HMG20A	0.000611145	0.0041695	0.00118041	0.1723	1.72153	2.62922	0.907682
GALNT5	0.000617651	0.00120154	0.00415148	1	2.30485	2.30485	0
VDAC1	0.000620178	0.167796	0.000442008	0.00434406	0.831173	3.26891	2.43774
AATF	0.000620571	0.00522292	0.00105198	0.13993	1.95518	3.10616	1.15098
H2AFJ	0.000622466	0.00487979	0.00109951	0.150113	2.55025	3.99962	1.44937
ITPR3	0.000623042	0.0415905	0.000453286	0.0176278	2.0329	5.26451	3.23161
AP3B1	0.000624706	0.0531787	0.000442005	0.0138344	1.51906	4.17455	2.65549
NPM1	0.000627975	0.0229458	0.000509326	0.0229458	1.0384	2.35663	1.31823
EPB41L2	0.000629316	0.00317957	0.00147761	0.230905	3.62546	5.24138	1.61592
REEP4	0.000634352	0.0165036	0.000637433	0.0452278	1.74328	3.41655	1.67326
SEPT2	0.000634624	0.0658267	0.000442128	0.0113577	0.910357	2.63995	1.72959
HSPE1	0.000634783	0.0194425	0.00060364	0.0383976	1.38856	2.80792	1.41937
CYB5A	0.000635583	0.105344	0.000438771	0.00711021	0.940188	3.12593	2.18574
SORD	0.00063648	0.049923	0.000453853	0.0150055	1.91454	5.17016	3.25562
CDK2	0.000636849	0.0246928	0.000563569	0.0303134	1.82753	3.87128	2.04375
SLC25A15	0.000636943	0.00469888	0.00116145	0.159279	1.75782	2.72925	0.971425
CLN6	0.000637712	0.00583446	0.00102513	0.128687	2.75726	4.45449	1.69723
PAWR	0.000638297	0.0206373	0.000596186	0.0363661	1.58785	3.24631	1.65846
ADAM9	0.000639053	0.0371366	0.000473723	0.0202338	1.87182	4.70999	2.83817
TUBB8	0.000640883	0.105774	0.0004426	0.00713857	0.550397	1.83094	1.28054
RPN2	0.000641868	0.648541	0.000873563	0.000812591	-0.142901	1.52251	1.66541
STX18	0.000642478	0.00190104	0.00190104	0.384185	2.73341	3.56138	0.82797
UBA5	0.000642885	0.00362138	0.0013923	0.207523	2.53889	3.75022	1.21134
RPS10	0.000647809	0.152562	0.000457265	0.00498908	0.700971	2.64588	1.94491
POF1B	0.00064823	0.0634625	0.000453274	0.0120263	1.96832	5.6414	3.67308
ACSL5	0.000648482	0.0269116	0.000562012	0.0283114	2.5335	5.44941	2.91591
ATAD1	0.000649391	0.00506613	0.00114019	0.150617	2.17408	3.41396	1.23987
SEC63	0.000652899	0.152525	0.000460908	0.00502811	0.95839	3.61465	2.65626
SYMPK	0.000654706	0.0564481	0.000462312	0.0136483	1.68833	4.68938	3.00105
RAB1C	0.000660144	0.694006	0.000774989	0.00100652	0.127157	1.69911	1.57195
CCT3	0.00066346	0.0249282	0.000589634	0.0312631	1.26046	2.66352	1.40306
GDA	0.000664739	0.00197068	0.00197068	0.382903	3.52197	4.596	1.07404
APOO	0.000665503	0.0337764	0.000503145	0.0231463	1.68825	4.14109	2.45284
RPS14	0.000668272	0.0281266	0.000523049	0.0279017	1.38372	3.25846	1.87474
CKAP5	0.000673254	0.0252178	0.000539711	0.0252178	2.38635	5.48536	3.09901
VAMP2	0.000674859	0.0587238	0.000475966	0.0135155	1.18592	3.31797	2.13205
PDLIM5	0.000675836	0.0268658	0.000575199	0.0268658	2.10746	4.59931	2.49185
NCF1	0.000675911	0.011596	0.000790313	0.0685715	-2.15262	-3.91932	-1.76671
PARVA	0.00067642	0.0671922	0.000472528	0.0118423	1.24326	3.60359	2.36032
DDAH1	0.000676864	0.0176023	0.000674136	0.0451898	2.45306	4.83233	2.37927
NPEPPSL1	0.000677546	0.0197604	0.000649118	0.0402826	1.63609	3.2954	1.65931
ADI1	0.000678942	0.00208791	0.00235756	0.688142	2.65173	2.99693	0.345207
ATP2B3	0.000692884	0.00814203	0.000960244	0.100043	2.11279	3.59151	1.47872
PPME1	0.000694413	0.0220182	0.000645702	0.0370277	2.1412	4.39324	2.25203
NCBP1	0.000694783	0.641609	0.000771304	0.0011579	0.225821	2.54992	2.3241
HSP90AB3P	0.000702709	0.376495	0.000600777	0.00211548	0.314978	1.90336	1.58838
LYPLA2	0.00070285	0.00913416	0.000924951	0.0904383	2.16196	3.74771	1.58575
EXOSC1	0.00070331	0.00280952	0.00191517	0.288198	1.64713	2.28637	0.639232
SEL1L	0.000703564	0.505328	0.000681074	0.00153636	0.391006	3.11285	2.72184
TCF12	0.000705052	0.0108964	0.000856433	0.0760471	2.05026	3.67144	1.62118
GPD1L	0.000705343	0.00192136	0.00192136	0.413039	3.11112	3.99774	0.886625
YWHAB	0.000706641	0.0182164	0.000701744	0.0455479	0.711413	1.40398	0.692571
CANX	0.000707478	0.0215551	0.00066459	0.038524	0.670455	1.3671	0.696643
ITIH2	0.000708606	0.00159906	0.00159906	0.491681	3.50345	4.32341	0.819967
NCOR2	0.000713829	0.0518452	0.00051165	0.0161676	2.20125	5.93459	3.73334
DDX47	0.000713923	0.382744	0.000613801	0.00210996	0.592155	3.61929	3.02713
RETN	0.000714715	0.0111336	0.000863154	0.0754195	-1.82512	-3.27614	-1.45102
VSIG2	0.000722875	0.00181761	0.0031773	0.81133	2.07879	2.23729	0.158496
ACP1	0.000723425	0.00407661	0.00152451	0.206479	2.41543	3.58744	1.17201
AAR2	0.000727019	0.00291444	0.00195808	0.286816	2.51865	3.5032	0.984549
TEX264	0.00072727	0.00348167	0.00171502	0.241837	2.90043	4.17624	1.27581
WBP11	0.000729312	0.00951157	0.000951817	0.0900233	2.06815	3.59588	1.52773
CMPK1	0.000729518	0.0972467	0.000505844	0.00880593	0.861996	2.75966	1.89766
TCERG1	0.000729627	0.0105696	0.000906949	0.0810549	2.52654	4.48015	1.95361
GMPS	0.000734476	0.149217	0.000518598	0.00575885	1.20018	4.44145	3.24127
NOMO1	0.000737713	0.616758	0.000796931	0.00128261	0.350744	3.67097	3.32023
UFL1	0.000739136	0.0600948	0.000523682	0.0144345	1.59288	4.4445	2.85162
CRYZ	0.000740976	0.841355	0.00088947	0.00088947	0.132848	3.40597	3.27312
POM121	0.000741844	0.00142851	0.00475546	1	2.12721	2.12721	0
MIA3	0.000745772	0.0241509	0.000612345	0.0241509	2.47086	5.56882	3.09796
SLC25A3	0.000746974	0.170031	0.000534489	0.0051265	0.62597	2.43381	1.80784
CLPTM1L	0.000750937	0.0591471	0.000533398	0.0148937	1.22221	3.39099	2.16878
AGMAT	0.000757027	0.00206551	0.00206551	0.411052	2.64918	3.41357	0.764386
NUP153	0.000759669	0.00516324	0.00140259	0.17155	3.38176	5.21669	1.83492
HIST2H2AC	0.000766135	0.0227595	0.000718172	0.0394469	1.95182	3.98798	2.03616
PIN1	0.000771631	0.000935193	0.0115772	0.618049	2.87072	2.44145	-0.429278
CNNM3	0.000776928	0.00199945	0.00199945	0.433231	2.92912	3.73135	0.802237
COPB1	0.000780001	0.681665	0.000898817	0.00120342	0.206978	2.61568	2.4087
GMDS	0.000792226	0.0290199	0.000677178	0.0290199	2.52562	5.50922	2.9836
FARSA	0.00079707	0.0935555	0.000555003	0.00997482	1.08386	3.40065	2.31679
ASPH	0.000803147	0.0272289	0.000674521	0.0272289	1.87095	4.14166	2.2707
VPS53	0.00081055	0.0137496	0.000924446	0.0690205	2.58844	4.76389	2.17545
UTP18	0.000812585	0.0157046	0.000879043	0.0605758	1.73428	3.27351	1.53923
MCM4	0.000815892	0.28127	0.000638178	0.00332045	0.972735	4.77797	3.80524
GATAD2A	0.000820712	0.00189582	0.00189582	0.476802	3.01215	3.75579	0.743641
MYO1D	0.000823913	0.0254082	0.000678044	0.0254082	2.55534	5.76162	3.20628
MRPS31	0.00082512	0.00699169	0.00131416	0.137622	1.68979	2.72967	1.03987
VEZT	0.000826356	0.00299784	0.00233151	0.313588	2.5057	3.43424	0.92854
PPHLN1	0.000827421	0.00113189	0.00933801	0.726672	2.97328	2.65628	-0.316993
NDRG3	0.000829179	0.0246502	0.0007694	0.0393477	1.98574	4.08695	2.10122
SARNP	0.00083678	0.00280114	0.00251277	0.338117	2.2586	3.04702	0.788417
RALY	0.000837676	0.0262204	0.000764166	0.0373599	1.73993	3.62205	1.88213
EIF6	0.000838382	0.099926	0.000584838	0.00980424	0.702616	2.23905	1.53643
TIMM10	0.000838812	0.0357259	0.000644443	0.0274551	1.13919	2.76504	1.62586
MMS19	0.00084152	0.306166	0.000672681	0.00312824	0.713516	3.67717	2.96365
SFT2D3	0.000843905	0.235677	0.000635059	0.00412226	0.590455	2.62912	2.03867
CMAS	0.000856193	0.00365983	0.00210902	0.267788	2.64625	3.75326	1.10701
TXLNA	0.000866587	0.00188081	0.00439959	0.905417	2.76002	2.86508	0.105063
CKMT2	0.000867404	0.012746	0.00104005	0.0795032	2.10417	3.78587	1.6817
PSMD14	0.000869381	0.0453798	0.000644904	0.022386	0.83217	2.12938	1.29721
FAM118B	0.000875835	0.00445075	0.00189491	0.226477	2.78944	4.0975	1.30806
SEC23IP	0.000878207	0.00336324	0.00233758	0.297055	2.80805	3.9005	1.09246
GALNT3	0.000878441	0.0265905	0.000804856	0.0385891	2.80159	5.81837	3.01678
ENY2	0.00088051	0.00310241	0.00250235	0.321422	2.35796	3.2209	0.862936
S100A14	0.0008806	0.654211	0.00098254	0.00141594	0.355512	4.07832	3.72281
HYPK	0.000880706	0.00292915	0.00262372	0.339372	2.04455	2.7601	0.715543
HSP90AB2P	0.000883855	0.109963	0.000618245	0.00937012	0.498879	1.63096	1.13208
FAM192A	0.00088467	0.00198889	0.00198889	0.486856	1.91493	2.37931	0.464386
PPP1R1B	0.000884986	0.00181833	0.00483424	0.944202	2.61812	2.67662	0.0584963
RPL11	0.000891059	0.0313079	0.000707567	0.0313079	1.15608	2.70648	1.5504
NAA10	0.000891164	0.013209	0.00105964	0.0787537	2.3506	4.24441	1.89381
DPM1	0.000903825	0.0948017	0.000633041	0.011116	1.09688	3.41442	2.31754
NDUFB11	0.000904801	0.844345	0.000902847	0.000902847	-0.0826778	2.04191	2.12458
PEX5	0.000907983	0.00199292	0.00199292	0.496858	2.64458	3.27126	0.626679
EPN2	0.000913058	0.00267594	0.00267594	0.641081	2.79438	3.23361	0.439232
MGEA5	0.000913841	0.232018	0.00068581	0.00452058	0.858377	3.76477	2.90639
RANBP1	0.000914837	0.00523638	0.00180854	0.201408	2.45469	3.69815	1.24346
UGT1A9	0.000915787	0.0174313	0.000978494	0.0613011	2.57938	4.8997	2.32031
ALDH6A1	0.000916069	0.0325289	0.000795539	0.0325289	1.96858	4.25242	2.28384
MRPL23	0.000917209	0.00209096	0.00209096	0.523451	1.43312	1.75011	0.316993
RPS4Y2	0.000923525	0.00582643	0.00171147	0.183104	2.13782	3.28377	1.14594
SFXN2	0.000926581	0.00579961	0.00172445	0.1845	2.04272	3.13341	1.09069
POLDIP2	0.000929387	0.0163365	0.00102218	0.0663452	1.9798	3.70676	1.72696
ERGIC3	0.000931259	0.0216159	0.000923107	0.0502497	2.32833	4.60676	2.27843
UCK2	0.00093174	0.00498417	0.00191862	0.214921	1.93788	2.88382	0.945943
CUL5	0.000932924	0.0122667	0.00116102	0.0886097	2.16743	3.83658	1.66915
C1orf198	0.000933085	0.00177396	0.00563387	1	2.11906	2.11906	0
ESRP1	0.000934261	0.0555014	0.000679647	0.0196311	1.88217	5.02807	3.14589
COPE	0.000938589	0.175476	0.000676379	0.00618065	0.522019	2.01313	1.49111
TMED10	0.000943543	0.68912	0.00108864	0.00142188	0.114974	1.46302	1.34804
MRPS18B	0.000943992	0.00422706	0.00219438	0.255001	1.94016	2.78935	0.849185
GCA	0.000945142	0.00322354	0.00270795	0.330338	-2.04995	-2.78953	-0.739578
IRF2BP2	0.0009494	0.00784831	0.00148992	0.140281	2.51167	4.07069	1.55902
CSNK1A1L	0.000951708	0.00809874	0.00146896	0.136315	1.75175	2.85537	1.10362
HSPA4L	0.000963929	0.00488364	0.00204346	0.226194	3.03607	4.4774	1.44133
C17orf75	0.000968535	0.00295668	0.00295668	0.366064	2.61921	3.48646	0.867243
NAT10	0.000976286	0.0953801	0.000686373	0.0119025	1.49414	4.62527	3.13113
TBC1D5	0.000977065	0.00965938	0.00138488	0.117425	2.95289	4.96223	2.00935
EIF3F	0.000978112	0.0907125	0.000688595	0.0125411	0.857719	2.61438	1.75666
RPL18A	0.000978253	0.246653	0.000742907	0.00452736	0.871982	3.92023	3.04825
RPIA	0.000978266	0.00519169	0.00200255	0.216123	2.20454	3.28333	1.07879
CGREF1	0.000979457	0.00243177	0.00396379	0.808327	1.98502	2.14351	0.158496
PXMP4	0.000984208	0.00245302	0.00245302	0.572541	1.84132	2.19982	0.358496
PNPO	0.000984646	0.00407099	0.00240252	0.274712	2.93054	4.15424	1.2237
SART1	0.000990494	0.0258409	0.000936461	0.044631	1.69741	3.45797	1.76056
KIAA2013	0.00099064	0.0291809	0.000901926	0.0395291	2.12692	4.4432	2.31628
PTPRC	0.000991533	0.00257616	0.00257616	0.424443	-3.66909	-4.72345	-1.05437
HOOK2	0.000992293	0.00220832	0.00220832	0.520922	2.40151	2.94074	0.539232
SUCLG1	0.000997677	0.0162918	0.00111777	0.0712465	1.40438	2.60582	1.20144
FUT8	0.00100432	0.125139	0.000707985	0.00930054	1.4241	4.80356	3.37946
RUVBL2	0.00100864	0.244075	0.000764463	0.00471253	0.754751	3.36521	2.61046
HIST2H2AB	0.00101846	0.0106598	0.00139124	0.110803	1.80164	3.06933	1.26769
CSNK2A1	0.00102325	0.113847	0.000720373	0.0104191	1.26055	4.11047	2.84992
RBM4	0.00102671	0.0961533	0.000723577	0.0123938	1.27234	3.92928	2.65694
KDM1A	0.00102902	0.00689102	0.00179501	0.171958	3.30117	5.15944	1.85828
CDCP1	0.00103154	0.00473702	0.00230506	0.247907	2.52684	3.66607	1.13923
COPG2	0.00103377	0.191275	0.000753767	0.00620611	0.901322	3.57282	2.6715
SMS	0.00103749	0.0927364	0.000732261	0.0129836	1.44251	4.40111	2.9586
TMUB2	0.00103805	0.029025	0.000865135	0.029025	1.34397	3.01345	1.66948
HM13	0.00103923	0.16704	0.000746595	0.00716583	0.908875	3.40263	2.49376
SAFB2	0.00104228	0.0101332	0.00147166	0.119096	2.61309	4.39486	1.78177
RPS3	0.00105713	0.148166	0.000752568	0.00823097	0.782595	2.7919	2.0093
ATAD3B	0.00106254	0.424482	0.000942925	0.00275019	0.606726	3.89979	3.29307
BCL7A	0.00107045	0.00201959	0.00623395	1	1.65384	1.65384	0
PPIL1	0.00107541	0.0125667	0.00137844	0.0991398	1.33415	2.33073	0.996578
OAT	0.00108114	0.0828392	0.000768508	0.015134	1.88088	5.52596	3.64508
GFAP	0.00108456	0.0932963	0.000767214	0.0134691	0.697012	2.12128	1.42426
RALA	0.0010886	0.022054	0.00110762	0.0572951	1.91508	3.73637	1.82129
HECTD1	0.00109	0.032014	0.000982032	0.0395344	2.58228	5.44226	2.85998
SFXN4	0.00109276	0.00303369	0.00369929	0.733297	2.24982	2.50832	0.258496
CD2AP	0.00109919	0.0402459	0.000852682	0.0317048	1.0887	2.64225	1.55355
CSTF3	0.0011012	0.870041	0.00105276	0.00105276	-0.0945295	2.75838	2.85291
PPCS	0.00110258	0.00326222	0.00326222	0.668082	3.11135	3.56737	0.456022
HNRNPH3	0.00110347	0.148094	0.00078649	0.00858076	0.632314	2.24613	1.61382
TFIP11	0.00110864	0.558633	0.00111675	0.00210989	0.316649	2.7437	2.42705
EMC1	0.0011097	0.328121	0.00303068	0.000964895	-0.744625	3.20222	3.94685
ADRM1	0.00111084	0.00510561	0.00243707	0.246861	1.92884	2.80877	0.879928
RRP9	0.00111149	0.00282713	0.00282713	0.595992	1.80302	2.13522	0.332193
THEMIS2	0.0011123	0.019108	0.00120038	0.0674926	-2.40474	-4.54604	-2.1413
RAB22A	0.00112451	0.0261454	0.00108579	0.0498823	1.26234	2.5408	1.27846
WDR74	0.0011327	0.00241453	0.00241453	0.515484	2.67044	3.28743	0.616993
TOMM6	0.0011327	0.025442	0.00110539	0.0516199	1.49752	2.99469	1.49716
BROX	0.00114509	0.0351422	0.000992994	0.0351422	1.91216	4.15329	2.24113
PNO1	0.00115817	0.0260918	0.00112571	0.0514291	1.65374	3.31585	1.66211
HNRNPUL1	0.00115964	0.467613	0.00106951	0.00268612	0.615699	4.3047	3.689
NRAS	0.00116187	0.00565127	0.00242434	0.233299	2.57591	3.80241	1.2265
RAB1B	0.00116581	0.499774	0.00110824	0.00250748	0.184777	1.38688	1.2021
SKIV2L2	0.00117636	0.114547	0.000833237	0.0118399	1.00993	3.25562	2.24569
FAHD1	0.00117735	0.0117358	0.00160353	0.115643	1.9555	3.33127	1.37577
NUP93	0.00118022	0.417364	0.00103857	0.00309403	0.287428	1.80232	1.51489
C12orf57	0.00118969	0.00338243	0.00338243	0.387152	2.14736	2.83805	0.690689
RDH10	0.00119321	0.127594	0.000847073	0.0107601	1.2535	4.1866	2.93311
CLPTM1	0.00121066	0.0894059	0.000863363	0.0156301	1.43963	4.27824	2.83861
S100P	0.00122589	0.00651699	0.00237957	0.213599	2.56424	3.86415	1.29991
PAXBP1	0.00123109	0.00322222	0.0043173	0.76574	2.55699	2.81548	0.258496
C7orf50	0.00123423	0.00816831	0.00208479	0.1726	2.04829	3.22642	1.17814
LTF	0.00123432	0.00465763	0.00305021	0.296463	-1.86056	-2.61485	-0.754287
PLEC	0.00124838	0.0251218	0.00124861	0.0574144	0.887682	1.75046	0.862778
TUBA4B	0.00124883	0.742596	0.00150877	0.00169446	0.124291	1.8671	1.74281
RHPN2	0.00124945	0.0133799	0.00162457	0.107478	2.13896	3.71102	1.57207
TPX2	0.00125231	0.00234216	0.00699646	1	2.60185	2.60185	0
SPINT1	0.00125918	0.0359476	0.00108846	0.0359476	2.34158	5.10981	2.76823
TMF1	0.00126618	0.0313192	0.00105503	0.0313192	2.14832	4.84442	2.6961
SCO2	0.0012666	0.0023674	0.00705503	1	1.6676	1.6676	0
KRI1	0.00126878	0.0123594	0.00172348	0.117947	1.71482	2.9225	1.20768
PSMB7	0.0012771	0.00542582	0.0028656	0.26442	2.25069	3.24688	0.996193
MPO	0.00127972	0.00301014	0.00301014	0.45888	-3.36254	-4.2741	-0.911565
GGCT	0.00128274	0.0123225	0.00175106	0.119527	2.32619	3.95632	1.63013
GPAA1	0.00129114	0.141419	0.000922599	0.0104525	1.10765	3.80924	2.70159
CUL4B	0.00129149	0.104507	0.000919637	0.0142085	1.07722	3.33896	2.26174
NOMO2	0.00129182	0.597973	0.00134665	0.00225518	0.371647	3.50975	3.1381
TMEM126B	0.001302	0.00280359	0.00280359	0.4965	1.94961	2.43034	0.480735
ALYREF	0.00130203	0.0102534	0.00196812	0.145255	1.97487	3.23104	1.25617
SERPINB5	0.00131442	0.00522492	0.00307469	0.281322	3.33418	4.75061	1.41643
TFAP4	0.00131738	0.00325971	0.00485707	0.799393	1.83633	1.99482	0.158496
SEC24C	0.0013182	0.0542631	0.000993014	0.0280171	0.808148	2.07219	1.26404
ANXA4	0.00132287	0.209458	0.000979743	0.00715041	0.45188	1.82245	1.37057
VAMP3	0.00132444	0.0374613	0.00115193	0.0374613	1.0581	2.2998	1.2417
SEPT8	0.00132529	0.0572351	0.000991433	0.0266959	1.70362	4.42676	2.72314
CNOT11	0.00133631	0.0368317	0.001156	0.0368317	1.46937	3.20876	1.73939
FTSJ3	0.00134125	0.00569234	0.00297607	0.264064	2.28257	3.29994	1.01737
IYD	0.00135491	0.00340129	0.0048576	0.788946	2.54201	2.77421	0.232193
NDUFAF3	0.00135564	0.00545151	0.00312016	0.277826	1.43373	2.05072	0.616993
TUBA4A	0.00135821	0.167116	0.000982097	0.00925083	0.399966	1.45961	1.05964
POM121C	0.00136256	0.00661001	0.00274342	0.232152	2.41697	3.59469	1.17773
IRF2BPL	0.00136399	0.00860754	0.00232008	0.179987	1.69041	2.65253	0.962114
EXOC4	0.0013655	0.0371015	0.00110633	0.0371015	1.46408	3.40545	1.94137
RER1	0.00136845	0.0848271	0.000986574	0.0185397	0.913939	2.64083	1.72689
EXOSC5	0.00137062	0.00297725	0.00297725	0.491345	2.56676	3.21188	0.645121
C6orf120	0.00137575	0.043289	0.00108134	0.0366122	0.96767	2.33385	1.36618
STAU2	0.00138233	0.00565673	0.00312611	0.272993	2.60829	3.74784	1.13955
ACO1	0.00139735	0.0368034	0.00126252	0.0437147	2.24902	4.74923	2.50021
TRIM28	0.00140163	0.140107	0.00100416	0.0114139	0.787813	2.67832	1.8905
SF3B1	0.00140588	0.17152	0.00101966	0.00930862	0.881892	3.24153	2.35964
KRT20	0.00141339	0.0335224	0.00131643	0.0485146	1.68105	3.47355	1.7925
TP53BP1	0.00141507	0.889609	0.00152707	0.00152707	0.118336	4.09299	3.97465
OCIAD2	0.00141592	0.0905353	0.00101917	0.0179391	1.48495	4.36041	2.87546
ITGB1	0.00141942	0.0450948	0.00111133	0.0362175	1.20444	2.92435	1.71991
CARS	0.00143725	0.0353089	0.00132145	0.0468112	1.92574	4.01666	2.09092
TMC4	0.00144071	0.0110792	0.00216135	0.14802	2.84972	4.66971	1.81999
SLC35B2	0.00144851	0.108202	0.00103711	0.0153124	0.964422	2.98859	2.02417
COG1	0.00146275	0.00600131	0.00325623	0.271568	2.54939	3.67524	1.12586
C12orf43	0.00146501	0.00306609	0.00655215	0.910134	3.16389	3.28431	0.120414
NAPG	0.00146564	0.0061002	0.00322742	0.267853	2.32045	3.35562	1.03517
SSR3	0.0014673	0.457333	0.00133427	0.00343783	0.267831	1.79068	1.52285
HYOU1	0.00146893	0.120786	0.00105143	0.0138812	0.601246	1.93026	1.32901
PDSS1	0.00147503	0.00321964	0.0062015	0.880006	1.95392	2.05392	0.1
TCN1	0.00147636	0.00126179	0.0465623	0.317396	-2.18906	-1.50783	0.681228
PRDX1	0.00148818	0.15552	0.0010737	0.0108644	0.589641	2.07276	1.48312
MDH2	0.0014941	0.29497	0.00117996	0.00561207	0.359247	1.71472	1.35547
ANK2	0.00149841	0.00550723	0.00359755	0.301048	2.866	4.04149	1.17549
PEBP1	0.00150344	0.00352264	0.00352264	0.456747	1.97668	2.52532	0.548634
TKFC	0.0015097	0.0381863	0.00130342	0.0381863	1.93816	4.25205	2.31389
PRDM10	0.00151056	0.00279585	0.00802801	1	2.89518	2.89518	0
SAFB	0.00151101	0.05714	0.00114544	0.030336	1.46959	3.76457	2.29497
MMGT1	0.00151633	0.123463	0.00108708	0.013994	0.947675	3.05573	2.10806
XRCC1	0.00151648	0.00330165	0.00330165	0.487812	2.72864	3.42864	0.7
XRCC5	0.00152029	0.710141	0.00176461	0.00215117	0.0871693	1.13867	1.0515
RIC8A	0.00152434	0.0180087	0.00182724	0.096731	2.28288	4.09978	1.8169
RTFDC1	0.00153597	0.0139769	0.00208189	0.125116	1.94551	3.31328	1.36777
RETSAT	0.001536	0.0190902	0.0017981	0.091966	3.03956	5.51951	2.47995
MRPL19	0.00153771	0.0367905	0.00131264	0.0367905	1.43533	3.18224	1.74691
SNRPD2	0.00154122	0.00418075	0.00418075	0.399058	2.48412	3.28331	0.799185
MTFP1	0.00154166	0.138374	0.00110814	0.0126598	1.00768	3.37802	2.37034
PFDN6	0.00155311	0.00345619	0.00345619	0.570692	2.33739	2.81777	0.480374
CST3	0.00156176	0.00267525	0.00927832	0.941101	1.83844	1.79331	-0.0451358
RPL22	0.00156667	0.0120535	0.00230998	0.147393	1.80712	2.97754	1.17042
ALDOA	0.00157698	0.00955896	0.00266281	0.185909	1.24499	1.95406	0.709072
DDX1	0.00158179	0.197545	0.00116658	0.00900464	0.664068	2.56276	1.89869
MCEE	0.00158689	0.00339798	0.00668489	0.890585	1.76952	1.85253	0.0830075
BCCIP	0.00159148	0.00804405	0.00300711	0.221503	2.02825	3.06749	1.03923
RRBP1	0.00159528	0.6281	0.00170287	0.00259953	0.210197	2.11205	1.90186
RPS19	0.0016095	0.138675	0.00115903	0.0131614	0.841982	2.81261	1.97062
HSPA6	0.00161547	0.271575	0.00125307	0.0065934	0.565321	2.55214	1.98682
ACADSB	0.00162453	0.0366381	0.00151058	0.0507365	1.78259	3.69515	1.91256
MCM2	0.00162921	0.209153	0.00121055	0.00872961	1.24063	4.89935	3.65873
SDCBP2	0.0016388	0.00355738	0.00669884	0.879661	1.92717	2.02717	0.1
NLN	0.00164358	0.381051	0.00139408	0.00467058	0.681733	3.84155	3.15982
PFKP	0.00165565	0.0823077	0.00121307	0.0229411	1.50675	4.23107	2.72432
PRPF4	0.00165638	0.0251895	0.00176269	0.0750452	1.99359	3.80071	1.80712
HSD17B12	0.00165874	0.0672607	0.00124127	0.0281625	1.08072	2.86421	1.78349
SRSF6	0.00166731	0.0263828	0.00174575	0.0721229	2.00873	3.86444	1.85571
EIF3G	0.00167402	0.00994997	0.00282332	0.188942	2.43081	3.81327	1.38246
GTF2H4	0.0016821	0.0720209	0.00125028	0.0266447	1.29791	3.501	2.20308
ITPA	0.00168619	0.00878417	0.00308301	0.214545	1.93925	2.96092	1.02167
DRG1	0.00169995	0.0428651	0.00149712	0.0428651	1.55312	3.35983	1.80671
PDHB	0.00170049	0.142095	0.00122819	0.013529	0.739119	2.47745	1.73833
CYP3A5	0.00170379	0.00313251	0.00876745	1	2.68939	2.68939	0
RPS2	0.00171514	0.373427	0.00144473	0.00496977	0.603675	3.33505	2.73138
ARF5	0.00171667	0.058503	0.00131404	0.0334831	0.836887	2.12784	1.29095
SSR4	0.00171767	0.129724	0.0012391	0.0149886	0.71587	2.31916	1.60329
FAM83E	0.00172895	0.00317618	0.00886193	1	1.97514	1.97514	0
ZC3H4	0.0017327	0.00361456	0.00361456	0.503389	2.60245	3.25318	0.650734
HSD17B7	0.00173302	0.0259703	0.00184194	0.0760019	1.69436	3.23303	1.53867
RPAP3	0.0017338	0.00525188	0.00466821	0.358163	2.72726	3.71259	0.985331
ERLIN2	0.00173571	0.0700357	0.00129793	0.0282401	1.16962	3.11977	1.95015
EIF2S3L	0.00174325	0.0404732	0.00143269	0.0404732	1.42292	3.28912	1.8662
GALE	0.00174442	0.117175	0.0012599	0.0168691	1.69549	5.29396	3.59847
HSP90AA2P	0.00174745	0.107287	0.00126498	0.0184781	0.478588	1.45088	0.972292
PGK1	0.0017541	0.0073613	0.0036756	0.263382	1.18067	1.72596	0.545286
SNRNP200	0.00176055	0.843835	0.00200412	0.00200412	0.0891245	2.13593	2.0468
NENF	0.0017662	0.00237146	0.0155289	0.743035	2.0422	1.82229	-0.219907
CASK	0.00176634	0.254255	0.00135378	0.00768938	1.34264	5.79536	4.45272
SHMT1	0.00177672	0.00462363	0.00462363	0.411521	2.81454	3.70708	0.892541
PSEN1	0.00178338	0.0964923	0.00129901	0.0209762	1.06276	3.10781	2.04505
HDLBP	0.00178697	0.149392	0.00129541	0.0134757	0.979025	3.32711	2.34808
CYB5R3	0.00179554	0.0578927	0.00138328	0.0353238	0.957886	2.41687	1.45899
FMNL1	0.00179771	0.00697173	0.0039624	0.283519	-3.20834	-4.61721	-1.40886
GIGYF2	0.00180607	0.00954424	0.00322145	0.21089	2.44699	3.76214	1.31515
DDX6	0.00184541	0.0223744	0.00211683	0.0934965	1.16629	2.13841	0.972116
PYURF	0.00184677	0.00363496	0.00833385	0.945294	1.5111	1.54671	0.0356144
ABCE1	0.00186481	0.0455812	0.00150758	0.0455812	1.22937	2.90425	1.67488
UGT8	0.00188112	0.0377471	0.00178179	0.056647	1.98705	4.0745	2.08745
COX6C	0.00188285	0.0308336	0.0019118	0.0693372	1.02658	2.01222	0.985645
LSM12	0.00191364	0.00380886	0.00839084	0.935599	2.09678	2.15528	0.0584963
HDDC3	0.00191947	0.00350583	0.00956531	1	1.61737	1.61737	0
SPTLC2	0.00193349	0.0195491	0.00238567	0.111613	1.65518	2.93071	1.27553
SLC25A24	0.00194151	0.00956842	0.00356229	0.22471	1.22192	1.85879	0.636875
DNAJC1	0.00195526	0.00658911	0.00468773	0.322218	1.8834	2.63962	0.756224
MYO1G	0.00195627	0.0421924	0.00161874	0.0421924	-2.07124	-4.77393	-2.70269
ARPIN	0.00196226	0.0103206	0.00344529	0.210975	2.06106	3.18103	1.11997
ESRP2	0.00197304	0.0129725	0.00302724	0.169939	2.29406	3.71359	1.41953
TBL2	0.00198266	0.0181574	0.00255243	0.122879	2.71391	4.71437	2.00046
ATIC	0.00198569	0.0190804	0.00249728	0.117201	1.58687	2.78524	1.19836
SRSF5	0.00198688	0.00534682	0.00576223	0.731116	2.15233	2.41803	0.265705
KPNA5	0.00199024	0.0391054	0.00188427	0.0576991	1.54339	3.16844	1.62505
EML4	0.00200642	0.00647827	0.00494005	0.334923	2.88784	4.01414	1.1263
TMUB1	0.00200759	0.0635776	0.00154278	0.0357682	1.24395	3.17974	1.93579
DDX21	0.00202123	0.047685	0.00180703	0.048048	2.10696	4.51953	2.41258
ECHS1	0.00202387	0.669182	0.0022348	0.00302063	0.141216	1.56545	1.42423
NDUFAF2	0.00202434	0.0613623	0.00156553	0.0373611	0.953702	2.41216	1.45846
TMEM41A	0.00202767	0.480676	0.00187288	0.00441289	0.348454	2.37495	2.0265
DNAJA2	0.00202921	0.014911	0.00291078	0.15228	1.83821	3.05241	1.21419
VAMP4	0.00202922	0.0351476	0.0019986	0.0653545	1.00516	2.0096	1.00444
RPLP0P6	0.00203212	0.394558	0.00174039	0.00549405	0.415148	2.35528	1.94014
CSNK2A3	0.00204402	0.104689	0.00149611	0.0219953	0.781205	2.31118	1.52998
TIMM10B	0.00204614	0.0192698	0.00258379	0.11937	1.50315	2.63307	1.12992
TMOD4	0.00204884	0.00499706	0.00664929	0.792093	1.06489	1.16489	0.1
LZTFL1	0.00205245	0.00916395	0.00396847	0.246286	2.43653	3.64015	1.20362
DNM1	0.00206232	0.0167047	0.00280172	0.138341	2.64039	4.48138	1.84099
CDK1	0.00206931	0.0415459	0.00177502	0.0415459	2.19411	4.88502	2.69091
HSD17B8	0.00207246	0.00454529	0.00771005	0.863073	1.64601	1.74601	0.1
COPS3	0.00207508	0.034296	0.00207109	0.0684004	1.70581	3.38227	1.67646
ARF1	0.00207534	0.202307	0.0015443	0.0113672	0.466247	1.76975	1.3035
CAND1	0.00210309	0.170474	0.0015438	0.0137377	1.06707	3.75704	2.68997
COPZ1	0.00211672	0.100704	0.00155644	0.0236513	1.14057	3.32005	2.17949
RNASET2	0.00212463	0.0104927	0.00381319	0.223227	1.88285	2.88055	0.997695
TUBB1	0.00214455	0.0495741	0.00173557	0.0488965	1.18979	2.82618	1.63639
PCNA	0.00215275	0.043292	0.00179521	0.043292	1.25839	2.88702	1.62863
RBM17	0.00216173	0.00906398	0.00430938	0.260774	2.31842	3.42656	1.10814
FAM20B	0.00216968	0.0232691	0.00255388	0.104735	1.55467	2.81387	1.2592
FHL2	0.00217382	0.0108926	0.00384523	0.219877	2.47811	3.80829	1.33018
KRT75	0.00217493	0.131459	0.0015878	0.018509	0.831263	2.64038	1.80912
C19orf25	0.00217796	0.00636862	0.0056807	0.365665	2.16854	2.95923	0.790689
DNM3	0.00219087	0.046989	0.00199513	0.052638	1.53546	3.25073	1.71527
NDFIP2	0.00219129	0.0113225	0.00379475	0.213396	1.46054	2.26054	0.8
LEMD2	0.00219401	0.0227055	0.00261891	0.108424	2.15731	3.87805	1.72074
ANP32D	0.0021997	0.165115	0.00161465	0.014814	0.821236	2.84095	2.01972
SCCPDH	0.00220119	0.030482	0.00232517	0.081296	1.96511	3.76694	1.80183
EIF5A2	0.00220974	0.0269023	0.002456	0.0923309	1.64774	3.07095	1.42321
YWHAE	0.00222197	0.100958	0.00163929	0.0247048	0.391216	1.13379	0.742569
SLC30A7	0.00222501	0.0431875	0.00186542	0.0431875	1.33817	3.05644	1.71827
RPS17	0.00222816	0.00506146	0.00506146	0.623231	1.33798	1.58285	0.244874
FKBP11	0.00223476	0.00737807	0.00525927	0.326151	2.18058	3.06218	0.881592
ALAD	0.00223683	0.00452376	0.00452376	0.566911	1.96702	2.39282	0.425797
BCL2L1	0.00224292	0.0569161	0.0017775	0.0444265	1.29054	3.16222	1.87168
SNRPD1	0.00224926	0.019915	0.002875	0.126239	1.84841	3.21863	1.37022
CD59	0.00225037	0.0471725	0.00185233	0.0471725	1.39397	3.2513	1.85733
VPS50	0.00225214	0.0287681	0.00244709	0.0879647	2.19727	4.14589	1.94862
WBP4	0.00225742	0.00408634	0.0107663	1	1.82173	1.82173	0
ATOX1	0.00226561	0.00508226	0.00508226	0.46501	1.48336	1.90624	0.422882
FUBP1	0.00226896	0.218083	0.00170645	0.0114401	0.538376	2.09696	1.55859
POLR2M	0.00226899	0.00591301	0.00591301	0.694046	1.60679	1.83898	0.232193
PSMC6	0.00227514	0.29706	0.00180225	0.00828902	0.482904	2.22	1.73709
ABR	0.0022772	0.833788	0.00259202	0.00259202	0.145742	3.19718	3.05144
COPS7A	0.00228144	0.0678332	0.00175997	0.0378509	1.15324	2.95894	1.8057
FASN	0.00229356	0.120574	0.00168186	0.0212585	1.73515	5.31636	3.58121
TXNRD1	0.00229397	0.594164	0.00234762	0.00390097	0.387356	3.42197	3.03461
TBL1XR1	0.00229468	0.200935	0.00171097	0.0125897	0.809254	3.03074	2.22148
PDS5B	0.00229532	0.181907	0.00169723	0.0139585	1.41424	5.07004	3.65579
STX12	0.00231218	0.0951571	0.00171828	0.0272419	1.14544	3.24389	2.09845
SNX8	0.00232764	0.00608632	0.00608632	0.403905	2.21703	2.95744	0.740414
SLC4A1AP	0.00234271	0.00909458	0.00483368	0.279343	2.62809	3.83577	1.20768
POLR2I	0.00236255	0.0356296	0.00239196	0.0744451	1.52551	3.00137	1.47586
HDDC2	0.00236351	0.00544877	0.00544877	0.452641	1.35241	1.75241	0.4
TTC27	0.00238348	0.00533341	0.00533341	0.623967	1.94825	2.30674	0.358496
CDS2	0.00240186	0.11238	0.00177116	0.0238581	0.839415	2.49864	1.65922
ERGIC1	0.0024038	0.0390963	0.00236384	0.0690068	1.74004	3.48934	1.7493
SRI	0.00240418	0.110155	0.00177472	0.0243703	0.906138	2.67901	1.77287
PPP1CB	0.00241568	0.411218	0.00209536	0.00618049	0.322173	1.85919	1.53702
HSD17B10	0.00241903	0.0951557	0.00180416	0.0284363	1.09652	3.09004	1.99353
PCYT2	0.00242173	0.00460209	0.0104671	0.960123	2.60557	2.65152	0.0459432
DPH2	0.00242207	0.00330281	0.0183222	0.76984	2.00932	1.80932	-0.2
CHMP3	0.00242627	0.00613866	0.00613866	0.415339	1.73041	2.2948	0.564386
MRPL12	0.00242849	0.0258432	0.00281324	0.104951	1.4417	2.62996	1.18826
GSR	0.00243614	0.239388	0.00185776	0.0111002	0.618869	2.50552	1.88665
DCAKD	0.00243765	0.0147803	0.00374596	0.181857	1.56274	2.52123	0.958496
LARP1	0.00244991	0.0524056	0.00199487	0.0524056	1.97027	4.67589	2.70562
RAB2B	0.00245608	0.770992	0.00298951	0.00306214	0.161627	2.55315	2.39152
NOP9	0.00247065	0.0375138	0.0024794	0.0737795	2.02116	4.00076	1.9796
TMCC1	0.00247181	0.032751	0.0026092	0.0844441	1.37213	2.63309	1.26096
PPP1CC	0.00248055	0.450339	0.00222424	0.00573442	0.317454	1.98437	1.66692
EEF2	0.00248827	0.0976867	0.00185602	0.0284415	0.742144	2.10229	1.36015
YARS	0.00249357	0.090256	0.00187332	0.0308755	1.04896	2.89809	1.84913
RAB33B	0.00249549	0.041989	0.00241364	0.0665923	1.25583	2.54831	1.29248
IDH3B	0.00250605	0.0205804	0.00325659	0.135152	2.44916	4.23068	1.78152
NAPRT	0.00254575	0.0186148	0.00349878	0.151257	2.2945	3.8684	1.5739
SRPRB	0.00256942	0.923416	0.00221433	0.00221433	-0.0471217	2.1601	2.20723
TIMM23	0.00257476	0.836266	0.00249017	0.00249017	-0.0846705	1.78073	1.8654
ARHGAP25	0.00257591	0.0634582	0.0020357	0.0454207	-1.90331	-4.72823	-2.82492
KHSRP	0.00257754	0.0459225	0.00222612	0.0459225	0.932772	2.07802	1.14525
BCKDHA	0.00257928	0.0129092	0.00439194	0.218142	2.71991	4.22284	1.50293
TMEM106B	0.00258491	0.0583248	0.00207505	0.0496017	1.28108	3.10873	1.82765
BYSL	0.00258498	0.28336	0.00203018	0.00982928	0.781368	3.44687	2.6655
PUDP	0.00259025	0.00767026	0.00638727	0.358056	2.16343	2.98537	0.821939
PSMC4	0.00259351	0.173146	0.00192073	0.0164866	0.568961	1.97235	1.40338
PKM	0.00260331	0.014232	0.00419118	0.200288	1.00847	1.59745	0.588987
FXR2	0.00260823	0.00441542	0.0131235	0.953742	2.32756	2.28017	-0.0473931
LYPLA1	0.0026093	0.00507656	0.00507656	0.566097	1.94626	2.37621	0.429949
PHF6	0.00261542	0.00469625	0.0119838	1	1.90624	1.90624	0
REEP5	0.00262069	0.0527185	0.00234563	0.0527185	1.22691	2.64632	1.41941
RNF128	0.00263348	0.00598236	0.00861698	0.829526	1.27702	1.37702	0.1
UBE2I	0.00264579	0.0456129	0.0022465	0.0456129	1.6171	3.669	2.0519
PDIA4	0.00264668	0.0756238	0.00204151	0.0390593	0.866256	2.25471	1.38845
SUPV3L1	0.00265762	0.0147055	0.00422876	0.197749	2.30082	3.65932	1.3585
LDHA	0.00265968	0.0773749	0.00204618	0.0383456	0.650615	1.70386	1.05324
HSP90B1	0.0026742	0.0512412	0.00221409	0.0512412	0.585646	1.36759	0.781949
PTRH2	0.00267694	0.15327	0.00197716	0.0192578	1.00093	3.29305	2.29212
HSPA14	0.00268116	0.00688992	0.00745915	0.74871	1.95852	2.19072	0.232193
SEC23A	0.00270743	0.104818	0.0020221	0.0286847	1.02926	2.95495	1.92569
REPS2	0.00271178	0.0064415	0.00829198	0.798657	2.13654	2.33654	0.2
COPS4	0.00271591	0.105889	0.00202748	0.0284744	0.470455	1.35468	0.884229
CTAGE5	0.00271613	0.448736	0.00242975	0.00626973	0.744647	4.59549	3.85084
RBM47	0.00273248	0.298122	0.0021695	0.00981358	0.824924	3.72933	2.90441
PPP6R3	0.002736	0.146017	0.00202197	0.0206614	1.25227	4.03459	2.78231
UBA3	0.00273986	0.0240375	0.0033916	0.12609	2.11887	3.74075	1.62188
ENDOG	0.00274762	0.00699991	0.00699991	0.706961	1.42106	1.62106	0.2
DLAT	0.0027504	0.0446667	0.00265741	0.0686312	1.89772	3.85939	1.96167
YWHAG	0.00275616	0.0630844	0.00219801	0.0487141	0.510765	1.25692	0.746151
IMP4	0.00275896	0.00493951	0.0124584	1	1.81809	1.81809	0
RAB6C	0.00277881	0.055356	0.00250796	0.055356	1.6129	3.45937	1.84647
C16orf58	0.00278325	0.290244	0.00219816	0.0102732	0.852712	3.78589	2.93318
EPS8L3	0.00278994	0.0117316	0.00522222	0.256522	2.61444	3.92332	1.30888
AP2B1	0.00279106	0.151468	0.00206543	0.0202775	0.850237	2.77199	1.92175
EMD	0.00279926	0.0107243	0.00558103	0.280133	2.26757	3.33261	1.06504
FDPS	0.00282054	0.258314	0.00218196	0.0117663	0.671286	2.78563	2.11434
CRELD1	0.00283481	0.0104386	0.00579461	0.290604	1.93873	2.82576	0.887036
EIF4E	0.0028513	0.276473	0.00223187	0.0110648	0.736221	3.16917	2.43294
TMEM209	0.00286259	0.0192048	0.00402208	0.163451	2.27861	3.80208	1.52347
BCKDK	0.0028638	0.00797502	0.00722462	0.376902	1.9953	2.72749	0.732193
NELFB	0.00286659	0.0348387	0.0030588	0.091267	1.82306	3.47948	1.65642
HMOX2	0.00286718	0.17906	0.00213579	0.0175075	0.648648	2.25611	1.60746
BOLA1	0.0028847	0.00729843	0.00798566	0.755762	1.36738	1.52588	0.158496
JAGN1	0.00289972	0.0196459	0.00404239	0.161785	1.23495	2.06714	0.832193
NARS	0.00292808	0.0522828	0.00272262	0.0622437	1.6163	3.38695	1.77064
EIF4A3	0.00293055	0.0825845	0.0022572	0.0393564	0.603747	1.59432	0.990576
KRTCAP3	0.00295778	0.0079312	0.00763004	0.389556	1.99759	2.71051	0.712928
TUBA1B	0.00296131	0.173778	0.00220579	0.018616	0.532505	1.82265	1.29015
EIF2S3	0.00296546	0.244438	0.00227754	0.0130719	0.699309	2.80326	2.10395
GPX2	0.00297242	0.010346	0.00625355	0.305607	2.70584	3.90357	1.19773
ANAPC16	0.00298602	0.00568628	0.00568628	0.530464	1.2785	1.59549	0.316993
COPA	0.00299176	0.46344	0.00270758	0.00662521	0.477833	3.01332	2.53549
SFN	0.00299428	0.307047	0.00239451	0.0103655	0.641239	2.92403	2.28279
CMTM4	0.00299701	0.00688084	0.0092587	0.817334	1.17066	1.27066	0.1
PTK2	0.00300259	0.0572124	0.00271553	0.0572124	2.30917	4.95417	2.645
UQCRFS1	0.00300819	0.0815923	0.0023268	0.0408365	1.01287	2.65703	1.64416
MMP9	0.00301062	0.00634822	0.00634822	0.622955	-3.74663	-4.45733	-0.710699
FAM210B	0.00301709	0.00788619	0.00788619	0.732191	1.55273	1.75273	0.2
GANAB	0.00301778	0.16457	0.00224552	0.0200446	0.478923	1.59978	1.12086
FKBP4	0.00302299	0.0998874	0.00228691	0.0334319	1.12009	3.12703	2.00694
PRPF3	0.0030609	0.0241175	0.00390881	0.139239	1.98391	3.45009	1.46618
YIPF4	0.00306221	0.039909	0.00314976	0.0848703	1.29952	2.53775	1.23823
NUP205	0.00307012	0.246117	0.0108736	0.00244403	-0.858192	2.62236	3.48055
B4GAT1	0.00308907	0.0148389	0.00518086	0.224664	1.74961	2.72283	0.973217
COPG1	0.00309876	0.314376	0.00249175	0.0104393	0.624388	2.87958	2.2552
ACSS1	0.00310096	0.0325207	0.00346932	0.105106	2.28801	4.25247	1.96446
TMEM62	0.00310205	0.734621	0.0036128	0.00404226	0.200744	2.66648	2.46573
GOT1	0.00310375	0.00768406	0.00768406	0.708069	2.57514	2.94116	0.366017
ERGIC2	0.00311532	0.190378	0.00233668	0.0177696	0.993689	3.51707	2.52338
RCC1	0.00311908	0.0590814	0.00255887	0.0584794	1.34921	3.21367	1.86446
SLC25A10	0.00312876	0.0336181	0.00346012	0.102573	2.19319	4.10266	1.90947
STARD10	0.0031342	0.0118179	0.00614672	0.282596	2.56414	3.77931	1.21517
FAAP100	0.00317428	0.0056398	0.0137935	1	1.23829	1.23829	0
H2BFS	0.00318431	0.00336155	0.0381611	0.544351	3.64589	2.89015	-0.755744
GSTM3	0.00319649	0.465255	0.00583973	0.00311429	-0.860101	4.58834	5.44845
HN1L	0.0032085	0.310293	0.00257351	0.010938	0.620898	2.82923	2.20834
ALDH1B1	0.00322596	0.0409929	0.00332399	0.08677	1.93354	3.77366	1.84012
YKT6	0.00323262	0.258784	0.00250822	0.0133523	0.755136	3.09144	2.3363
PIR	0.00323313	0.0296945	0.00380445	0.119471	1.55477	2.81326	1.2585
IL16	0.00324024	0.314849	0.00260753	0.0108692	-1.00489	-4.61686	-3.61197
SOX9	0.00324377	0.00575648	0.0140119	1	1.48445	1.48445	0
CLUH	0.00326412	0.0727218	0.00259148	0.0495362	1.92397	4.8325	2.90852
GPRC5A	0.00327402	0.0530751	0.00287736	0.0530751	1.40884	3.11136	1.70252
ABLIM1	0.0032781	0.00581408	0.0141192	1	3.54557	3.54557	0
DCTN6	0.00328747	0.00598028	0.00598028	0.560387	1.29956	1.59956	0.3
DDX39B	0.00329285	0.20888	0.00249213	0.0170025	0.592183	2.17266	1.58048
RAB12	0.00329615	0.0672516	0.0026559	0.0540878	1.31713	3.23113	1.914
TRIP13	0.00331472	0.0125316	0.00640083	0.281003	2.30473	3.41026	1.10553
NCOR1	0.00336165	0.0248119	0.00435558	0.147633	2.74202	4.73414	1.99212
NDUFS4	0.00337043	0.0262863	0.00424808	0.139883	1.64531	2.87746	1.23216
ILF3	0.00337865	0.19543	0.00254664	0.0186668	0.886432	3.14609	2.25966
MGST1	0.00340122	0.992505	0.00298133	0.00298133	-0.00692194	3.17982	3.18675
ADSS	0.00340553	0.0603795	0.00309103	0.0603795	1.68614	3.61889	1.93275
GFER	0.00340817	0.0201913	0.00494473	0.182607	1.60678	2.64077	1.03399
RABGGTA	0.00340938	0.0764261	0.00269856	0.0490908	1.34064	3.3991	2.05846
ACO2	0.00341165	0.0599357	0.00313076	0.062712	0.952031	2.0241	1.07207
NUP50	0.003435	0.0766526	0.00271987	0.0492909	1.20152	3.04634	1.84482
NDUFS7	0.00343998	0.0176237	0.00541575	0.209935	1.55223	2.46923	0.916993
PACSIN2	0.00344141	0.242619	0.00265013	0.0151557	1.03562	4.06961	3.034
PDZK1IP1	0.00344202	0.00629705	0.00629705	0.545422	2.30669	2.86519	0.558496
BAIAP2L1	0.00345199	0.0605824	0.00313223	0.0605824	1.8796	4.03679	2.15719
MRPS35	0.00345443	0.0602643	0.00312947	0.0602643	1.45315	3.12536	1.67221
ATXN10	0.00345531	0.238473	0.00265538	0.0154908	0.922055	3.58983	2.66778
TWF1	0.00347118	0.13573	0.00260443	0.0278727	1.23443	3.76975	2.53532
LRPAP1	0.00349019	0.0184888	0.00537035	0.203131	2.14502	3.442	1.29698
SPCS2	0.00349695	0.128843	0.00263016	0.0296021	0.921514	2.75912	1.8376
S100A12	0.00350023	0.0358297	0.00387797	0.106913	-1.51693	-2.83598	-1.31905
DECR2	0.00351157	0.00630922	0.00630922	0.562067	2.29769	2.82989	0.532193
CREB1	0.00351963	0.00826206	0.00826206	0.697077	2.18702	2.51579	0.328771
GOLGB1	0.00353516	0.632249	0.00371433	0.00545204	0.597788	5.60023	5.00244
VKORC1	0.00353547	0.0193263	0.00532689	0.196936	1.38964	2.24813	0.858496
INTS9	0.00353899	0.0233828	0.00480397	0.163944	1.95509	3.30428	1.34919
IDH3A	0.003539	0.0167216	0.00581537	0.226496	2.63636	4.12441	1.48806
DOCK6	0.00354376	0.00696125	0.00696125	0.607482	3.28844	3.95568	0.667243
EPHX1	0.00354587	0.939869	0.00295604	0.00295604	-0.0432885	2.44608	2.48937
USO1	0.00354873	0.662356	0.00383645	0.00518343	0.260488	2.66605	2.40557
TMEM141	0.00355953	0.00871732	0.00956889	0.768526	1.41416	1.57266	0.158496
SSRP1	0.00357138	0.621944	0.00371546	0.00561014	0.382759	3.47944	3.09668
TMEM238	0.00357905	0.00693398	0.00693398	0.517306	1.52214	1.92214	0.4
DNM2	0.00358007	0.0135444	0.00678189	0.279588	1.49063	2.21626	0.725627
EML2	0.00358161	0.00766309	0.00766309	0.651939	2.98212	3.50821	0.52609
VCP	0.00361239	0.060797	0.00300541	0.060797	0.596603	1.40705	0.810443
CHAMP1	0.00362561	0.00639545	0.0151887	1	1.48948	1.48948	0
RPS21	0.00362904	0.0174125	0.00587409	0.22287	1.73841	2.73398	0.995575
MAPK13	0.00363159	0.00865315	0.00865315	0.429059	1.9279	2.56713	0.639232
ME3	0.00363629	0.0181069	0.00575242	0.215062	1.90068	3.0154	1.11472
PEX26	0.00365949	0.00645198	0.0152914	1	1.77994	1.77994	0
DHX15	0.00368081	0.961317	0.00308823	0.00308823	-0.0203663	1.78802	1.80839
SLC25A5	0.00368889	0.120672	0.00279528	0.0332813	0.659856	1.91864	1.25878
S100A6	0.00370323	0.0334119	0.00429004	0.120641	1.87584	3.42232	1.54648
THOC2	0.00370678	0.833678	0.00354574	0.00354574	-0.177322	3.52085	3.69817
FGFR1OP	0.00370903	0.025598	0.00487761	0.156723	1.76253	3.02046	1.25793
RPLP0	0.00372085	0.329159	0.00302878	0.011802	0.716544	3.33928	2.62274
HAX1	0.00373413	0.0794441	0.0029681	0.0514305	1.41472	3.5894	2.17468
NIT2	0.00374831	0.259824	0.00291994	0.0152804	0.749407	3.02561	2.2762
TECR	0.00375562	0.0654133	0.00309381	0.0628792	1.6973	4.06655	2.36924
SELH	0.00375778	0.00676283	0.00676283	0.57093	1.31737	1.61737	0.3
CPOX	0.00376988	0.0145089	0.0069711	0.274285	2.39058	3.58	1.18941
APBB1IP	0.00377133	0.0113427	0.0083269	0.345593	-2.24581	-3.17167	-0.925855
MRPL24	0.00377621	0.0825301	0.00298763	0.0500144	1.02708	2.63249	1.60541
GPN1	0.00378	0.031982	0.00449075	0.128329	1.80781	3.25473	1.44691
SCAMP2	0.00378225	0.0280952	0.00477717	0.145728	1.70019	2.96893	1.26874
ALG1	0.00379582	0.103306	0.00292046	0.0400418	1.31864	3.62564	2.307
REEP3	0.00380332	0.0135505	0.00740162	0.294835	1.88991	2.7806	0.890689
HRSP12	0.00381801	0.0560322	0.00326142	0.0560322	1.15352	2.64194	1.48842
PKLR	0.00382516	0.0131097	0.00764085	0.305674	2.04935	2.98854	0.939197
MDC1	0.00384074	0.00980424	0.00961342	0.401631	3.07704	4.17927	1.10224
TOMM40	0.00385458	0.0560814	0.00329672	0.0560814	1.95699	4.47786	2.52087
PTPN6	0.00389904	0.0242401	0.00536057	0.172941	-2.54919	-4.28067	-1.73148
EIF4A1	0.00390263	0.422889	0.00340963	0.00940611	0.268057	1.50682	1.23876
CIRBP	0.00395843	0.0106175	0.00943902	0.383122	2.14011	2.947	0.806881
TMED7	0.00396053	0.232785	0.00304776	0.0180611	0.437014	1.65567	1.21866
DUT	0.0039638	0.0200629	0.00609364	0.210659	2.49271	3.99418	1.50147
ATP6V1D	0.00398508	0.0232291	0.00564768	0.183826	1.90504	3.1565	1.25146
OLA1	0.00404124	0.0490574	0.00409848	0.0895998	1.81815	3.59545	1.7773
PSMD4	0.00404497	0.0619383	0.00379319	0.0711661	1.49251	3.12994	1.63744
PUF60	0.00405076	0.958941	0.00374665	0.00374665	0.0298305	2.46797	2.43814
GGCX	0.00405375	0.0582635	0.00346213	0.0582635	1.32785	3.05094	1.72309
LMNA	0.00405907	0.213126	0.00310098	0.0202678	0.622119	2.25149	1.62938
MRPL47	0.00406218	0.0299907	0.00507774	0.145986	1.6874	2.96062	1.27322
COPB2	0.00409064	0.495784	0.00379413	0.00824336	0.426663	2.79444	2.36778
HNRNPA0	0.00409485	0.0284322	0.00526719	0.154903	1.3507	2.33729	0.986585
MPHOSPH6	0.00413163	0.00840902	0.0134334	0.887878	1.87219	1.97219	0.1
DDOST	0.0041328	0.937726	0.00392785	0.00392785	0.0266573	1.45405	1.4274
PCBP3	0.00414779	0.417543	0.00360827	0.0100991	0.423187	2.33668	1.91349
PPL	0.00415796	0.0657407	0.00384859	0.0688159	2.77317	5.8846	3.11143
CDC42EP5	0.0041759	0.00731039	0.016824	1	1.08244	1.08244	0
SF3B5	0.00419702	0.15673	0.00317855	0.028749	0.875176	2.76298	1.8878
DOCK7	0.00420589	0.087388	0.00333898	0.0522336	1.66927	4.29817	2.6289
MCM7	0.00420855	0.723842	0.00480992	0.00548071	0.374566	4.62206	4.2475
PSMB5	0.00421489	0.406116	0.0087897	0.00385684	-0.693478	3.07191	3.76538
RAB10	0.00422699	0.205071	0.00322578	0.0219159	0.317287	1.12264	0.80535
GFM2	0.0042492	0.00708154	0.0183659	0.961867	2.34048	2.29898	-0.0415037
SMAGP	0.00425125	0.00660572	0.020594	0.904804	1.32961	1.27111	-0.0584963
LYRM7	0.00425783	0.00826768	0.00826768	0.511351	1.31302	1.67152	0.358496
ARF3	0.00427424	0.237367	0.00330435	0.019008	0.592597	2.24811	1.65552
CTDSPL2	0.00430459	0.0213855	0.00657151	0.213419	1.96442	3.15283	1.18842
YARS2	0.00431659	0.0340505	0.00517197	0.136355	2.10532	3.77332	1.668
MRPL15	0.00431927	0.0105554	0.0105554	0.744862	1.82188	2.05407	0.232193
DDX39A	0.00433516	0.12794	0.00331467	0.0364881	0.681657	1.98594	1.30428
DOCK8	0.00434466	0.0597155	0.00384763	0.0597155	-2.14568	-4.753	-2.60732
STX10	0.00435619	0.0611642	0.00371833	0.0611642	1.42793	3.29544	1.86752
EIF3L	0.00440054	0.602699	0.00447981	0.00707648	0.260091	2.1927	1.93261
MAT2B	0.00440177	0.00825851	0.00825851	0.526252	2.84074	3.58883	0.748091
TSFM	0.0044115	0.0620556	0.00394243	0.0620556	1.73061	3.80098	2.07037
C1orf123	0.00441374	0.0101785	0.0101785	0.717536	1.69443	1.93657	0.242146
SCAMP1	0.00442841	0.0166518	0.00800337	0.277746	2.21712	3.33589	1.11877
KIAA1191	0.00443752	0.0077432	0.0175794	1	1.55106	1.55106	0
FCGR3B	0.00444949	0.00845551	0.0155222	0.934879	-2.01069	-2.07297	-0.0622737
C10orf35	0.00444974	0.0525532	0.00449593	0.0915221	1.22551	2.43319	1.20768
PRKAG2	0.00445391	0.0138006	0.00921385	0.332926	1.68605	2.42121	0.735168
TMEM115	0.0044547	0.011132	0.0108993	0.406077	1.19605	1.62824	0.432193
TYSND1	0.00446408	0.010463	0.0117529	0.788266	1.91127	2.11127	0.2
EEF1A1	0.00446845	0.236024	0.00345767	0.0199349	0.537033	2.02128	1.48425
RAB14	0.004489	0.161719	0.00341311	0.0296496	0.551205	1.74847	1.19726
SEC16A	0.00449057	0.0669631	0.0040934	0.0669631	2.36037	5.08983	2.72946
TST	0.00450223	0.572853	0.00446025	0.00766225	0.392496	3.05458	2.66209
RBBP6	0.00454326	0.00992867	0.0130004	0.834353	1.95883	2.11733	0.158496
KIAA1468	0.00454719	0.0338211	0.00554742	0.143955	2.686	4.76906	2.08306
TCOF1	0.00455314	0.0180273	0.00789996	0.264083	2.75693	4.20771	1.45078
CCDC6	0.00455551	0.00796872	0.00796872	0.558832	2.50672	3.11224	0.605528
CLPP	0.0045666	0.00764758	0.0190821	0.968755	2.79736	2.75634	-0.0410207
FAM83F	0.00457952	0.00797758	0.017984	1	1.58441	1.58441	0
SRP14	0.00459429	0.0494737	0.00478111	0.100062	1.27896	2.48988	1.21092
IDH2	0.00460693	0.0687604	0.00386269	0.0687604	0.730414	1.73063	1.00021
USF1	0.00461488	0.0100464	0.0100464	0.693451	1.47477	1.70696	0.232193
BUB3	0.00462671	0.0391988	0.00530386	0.126614	1.73051	3.17679	1.44628
U2AF1	0.00463712	0.00831362	0.00831362	0.546293	2.45471	3.07043	0.615719
FKBP9	0.00467456	0.031165	0.00598266	0.159864	1.97709	3.42717	1.45008
RBM3	0.00467834	0.0194308	0.00782129	0.251956	1.62211	2.50911	0.887
ABHD10	0.00468339	0.124811	0.00360976	0.0402334	1.23794	3.54218	2.30424
C1QBP	0.00469295	0.164329	0.00357775	0.0304049	0.872054	2.76985	1.8978
HSPA7	0.00471439	0.6815	0.00515784	0.00654661	0.209005	2.20153	1.99252
ITGAL	0.00472225	0.0980184	0.00373548	0.0518354	-1.76382	-4.64426	-2.88044
HSPA5	0.00474384	0.0551922	0.00477584	0.0925157	0.764511	1.52334	0.758832
FNBP1	0.00476948	0.156638	0.00364196	0.0324306	-0.947978	-2.94796	-1.99998
IK	0.00477024	0.075058	0.00394759	0.0685065	1.45578	3.52378	2.068
CCNB1	0.00478552	0.00868479	0.00868479	0.539502	2.10081	2.64004	0.539232
PTPA	0.00479091	0.0091469	0.0161766	0.928383	3.10465	3.21147	0.106815
RHOT2	0.00479877	0.0288406	0.00644304	0.176495	2.35196	3.98497	1.633
SPI1	0.00480511	0.158915	0.00367007	0.0321764	-0.739409	-2.3106	-1.57119
UBA1	0.00483102	0.108351	0.0037837	0.0478333	0.614467	1.66783	1.05336
DHRS3	0.00483262	0.0545805	0.00490475	0.0951578	1.85697	3.68008	1.82311
ZC3H11A	0.00483514	0.00838608	0.00838608	0.561206	2.25791	2.80386	0.545943
PCM1	0.00484061	0.00840761	0.0187186	1	3.59903	3.59903	0
NDUFAF7	0.00484966	0.00863596	0.00863596	0.548217	2.35389	2.94458	0.590689
ALDH3A1	0.00487612	0.0335915	0.00609207	0.154451	2.61086	4.57916	1.9683
VNN2	0.00489276	0.00661748	0.0287868	0.791229	-2.28115	-2.05883	0.222323
RAB11FIP1	0.00489615	0.0501407	0.00514484	0.104723	1.76513	3.41708	1.65195
KRT84	0.00490942	0.16258	0.00375385	0.0320683	1.09133	3.43309	2.34176
MRPL54	0.00491088	0.0287426	0.00665545	0.180819	0.958873	1.61737	0.658496
UBAC1	0.00491902	0.011572	0.011572	0.742415	1.5285	1.7285	0.2
GET4	0.00493744	0.657152	0.00527417	0.00713378	0.323622	3.14296	2.81934
PPP2R5C	0.00494088	0.239865	0.00384335	0.0215353	0.725661	2.72246	1.9968
PSMB2	0.00496634	0.256065	0.00389217	0.0202019	0.525717	2.04029	1.51458
SMARCB1	0.00496946	0.00851951	0.0194204	0.990845	2.13885	2.12954	-0.00931094
NDUFS3	0.00498703	0.286026	0.00397033	0.0180411	0.553958	2.28747	1.73352
DRAP1	0.00499127	0.0160559	0.00976307	0.319334	1.47051	2.146	0.675489
INTS3	0.00499584	0.327132	0.00407754	0.0156597	0.928296	4.16934	3.24104
HIBCH	0.00499768	0.339868	0.00411321	0.0150358	0.917659	4.22979	3.31213
PABPC3	0.00500677	0.303675	0.00402744	0.0169907	0.403818	1.72837	1.32456
EEF1A1P5	0.00500811	0.0332556	0.00633868	0.159805	1.92845	3.36014	1.43169
MRRF	0.00502995	0.0147563	0.0105057	0.347788	1.99288	2.84366	0.850779
UROD	0.00503514	0.0104326	0.0104326	0.679169	3.03451	3.54304	0.508534
TVP23B	0.00504071	0.0110886	0.0110886	0.452802	1.19886	1.58955	0.390689
UTP14A	0.00506442	0.23668	0.00393791	0.0223502	1.15414	4.28819	3.13405
EIF3E	0.0050792	0.495236	0.00470137	0.0101101	0.430078	2.74623	2.31615
G3BP1	0.00508672	0.117782	0.00396908	0.0461132	0.913479	2.53548	1.622
IVD	0.00509815	0.0479256	0.00550648	0.113637	1.82177	3.46645	1.64468
RNF149	0.00510174	0.0226053	0.0080335	0.235673	1.63858	2.59074	0.95216
PMPCB	0.00510569	0.0635568	0.00497165	0.086116	1.83147	3.74692	1.91545
ACADVL	0.00512251	0.0903439	0.00413842	0.0607406	0.659261	1.67416	1.0149
TMEM41B	0.00514578	0.307468	0.0142242	0.00431584	-0.598092	2.00218	2.60027
ANKHD1	0.00515029	0.00891621	0.0195753	1	2.66732	2.66732	0
IFNGR1	0.00519356	0.00898715	0.0196938	1	1.52853	1.52853	0
RFC3	0.00519372	0.913808	0.00503442	0.00503442	0.0740822	2.84991	2.77583
ZBTB7A	0.00521681	0.0117786	0.0136623	0.806923	1.89287	2.07588	0.183007
WDR12	0.00521708	0.993675	0.00447666	0.00447666	-0.00545323	2.8262	2.83165
RANGAP1	0.00524975	0.075224	0.00439928	0.0747443	1.18193	2.8281	1.64616
ETFA	0.00526514	0.268435	0.00415907	0.020301	0.577138	2.2834	1.70626
S100A13	0.00526861	0.223208	0.00408297	0.0246603	0.895228	3.21539	2.32016
PCBP2	0.00527272	0.214317	0.00407502	0.0257483	0.951102	3.34931	2.39821
HIST2H2BE	0.00529422	0.0195589	0.00927813	0.279406	2.50295	3.79454	1.29159
HSPA8	0.00530902	0.177196	0.00407846	0.0315719	0.415976	1.34366	0.927686
DHPS	0.00530954	0.0297754	0.00724656	0.187532	2.24715	3.77569	1.52855
PCBD1	0.00534222	0.170089	0.00410553	0.0331279	0.705921	2.23967	1.53375
RAB35	0.00535184	0.177255	0.00411338	0.0317991	0.432712	1.39659	0.963875
NPTN	0.00536451	0.915486	0.00454075	0.00454075	-0.08995	3.42948	3.51943
TACSTD2	0.00536997	0.0289788	0.00746549	0.194474	2.15285	3.58662	1.43377
SART3	0.00537029	0.0695635	0.00512878	0.0825063	1.60242	3.33455	1.73212
NUP133	0.00537066	0.275458	0.00426016	0.0201241	0.919564	3.68337	2.76381
CDK2AP1	0.00537616	0.0119105	0.0119105	0.448245	1.2023	1.6023	0.4
POMK	0.00539373	0.00903227	0.00903227	0.578423	1.35832	1.67532	0.316993
HAGH	0.0054005	0.0247769	0.00822392	0.227172	2.17406	3.48174	1.30768
PATL1	0.00545838	0.0552482	0.00566879	0.105195	1.65106	3.22604	1.57499
STEAP3	0.00546578	0.070818	0.00520831	0.0823879	1.71878	3.58518	1.86639
ESD	0.00552123	0.0125137	0.0141185	0.802178	2.31891	2.55058	0.231663
AAMDC	0.00553567	0.0155348	0.0116634	0.360337	2.19067	3.10867	0.917991
EIF2B2	0.00553745	0.0479302	0.00610536	0.122581	1.5547	2.92274	1.36804
GYS1	0.00558219	0.0705087	0.00478577	0.0705087	1.39134	3.23974	1.8484
NUP160	0.00559697	0.190942	0.0251148	0.00436115	-1.28787	3.04382	4.33168
PSEN2	0.00559857	0.0753113	0.00473296	0.0753113	0.995254	2.3625	1.36724
AP2A1	0.00560859	0.350931	0.00465809	0.0161815	0.620321	2.88612	2.2658
MRPL45	0.00562954	0.0133255	0.0133255	0.420935	1.99527	2.71226	0.716993
LASP1	0.00563764	0.0186938	0.010473	0.308126	2.0716	3.06997	0.998368
PLRG1	0.0056472	0.168626	0.00435609	0.0352048	1.04873	3.29343	2.2447
NDUFB9	0.00564772	0.0495706	0.00617168	0.120761	1.86985	3.53525	1.6654
GSPT2	0.0056705	0.0323865	0.00756425	0.18349	1.81205	3.07575	1.2637
ECM1	0.00567618	0.00977656	0.0209968	1	2.52992	2.52992	0
PPP5C	0.00567781	0.0324803	0.00756572	0.183191	2.12942	3.6163	1.48688
PI4K2A	0.00569474	0.0596562	0.0058036	0.101403	2.1032	4.1672	2.06399
PCBP1	0.00570315	0.389265	0.00486419	0.0146912	0.341105	1.71343	1.37232
ARID1B	0.0057252	0.0108452	0.0108452	0.514156	2.83675	3.63625	0.799498
MEPCE	0.0057287	0.0122402	0.0122402	0.461476	1.59433	2.11132	0.516993
CALU	0.005799	0.585075	0.00578787	0.00948381	0.315871	2.46419	2.14832
UBAP2L	0.00585825	0.0115852	0.0115852	0.674657	2.66936	3.13275	0.463396
TMEM126A	0.00586414	0.0547445	0.00621541	0.113377	1.83142	3.53296	1.70154
BNIP1	0.00586976	0.266761	0.00464933	0.0226222	0.621495	2.41942	1.79793
RAB25	0.00587368	0.121758	0.00463088	0.0509897	1.11909	3.08751	1.96841
TFF2	0.00594324	0.0118516	0.0118516	0.490027	1.65412	2.15412	0.5
CAMK2A	0.00596071	0.0459717	0.00681986	0.136588	1.42392	2.61937	1.19546
HSPA2	0.00597449	0.36243	0.00500487	0.0165795	0.286172	1.35313	1.06696
RPL9	0.00599053	0.0592205	0.00619215	0.107006	1.75381	3.44295	1.68914
TAPBP	0.00603646	0.0757994	0.00574013	0.0844121	1.75681	3.68175	1.92493
SIL1	0.00605269	0.017048	0.0124273	0.357198	1.95225	2.78794	0.835692
MGST3	0.006117	0.209594	0.00475686	0.0302779	0.598349	2.04855	1.4502
CDK9	0.00620196	0.0164349	0.0132546	0.377358	1.95336	2.74982	0.796461
NDUFA6	0.00620671	0.0773968	0.00589534	0.0848317	1.47113	3.08876	1.61764
ATP2B1	0.00620689	0.0779645	0.00588208	0.0842206	1.58846	3.34185	1.75339
BIN2	0.00621013	0.0933024	0.00510873	0.0703495	-1.44949	-3.62885	-2.17936
BCAP29	0.00623442	0.0244238	0.0101253	0.261677	2.45303	3.81794	1.36491
RBMX	0.00624121	0.831246	0.00672662	0.00672662	0.152747	2.95093	2.79819
RALBP1	0.0062506	0.0111801	0.0111801	0.538408	1.42692	1.80765	0.380735
DAG1	0.006264	0.0116166	0.0116166	0.649782	1.88037	2.23887	0.358496
TTC38	0.00631305	0.0362676	0.00822047	0.181207	2.08633	3.58063	1.49431
RAB9A	0.00631422	0.044669	0.00743413	0.148043	1.51314	2.73867	1.22553
MRGBP	0.00631461	0.0136342	0.0136342	0.454548	1.1671	1.55779	0.390689
MYCBP	0.00632139	0.0105909	0.0105909	0.598245	1.79827	2.20234	0.404071
CA12	0.00633161	0.0487944	0.00717337	0.136148	1.73416	3.20973	1.47557
UNC93B1	0.00634002	0.0216749	0.0112095	0.297266	1.83671	2.76485	0.928143
TRMT112	0.00634052	0.321318	0.00518168	0.0199497	0.705783	3.04716	2.34138
KPNB1	0.00641197	0.450799	0.00572715	0.0139578	0.283705	1.59966	1.31595
CAPRIN1	0.00642834	0.124174	0.00510281	0.0543635	1.08977	2.99368	1.90391
EI24	0.00644536	0.0691626	0.00640267	0.0981887	1.68646	3.41487	1.72841
HSPH1	0.00644667	0.208335	0.00502621	0.0319986	1.02393	3.47358	2.44966
DECR1	0.0064626	0.0754971	0.0059064	0.0754971	1.3539	2.9525	1.59861
VPS52	0.0064835	0.171652	0.00504759	0.0393201	0.832862	2.59104	1.75818
FKBP2	0.00648429	0.0452778	0.0076441	0.149674	1.5354	2.77714	1.24174
TIMP1	0.00650843	0.0138306	0.0138306	0.726625	2.43296	2.7851	0.35214
SKIV2L	0.00651283	0.0741643	0.00591894	0.0741643	1.69853	3.72684	2.02831
REPS1	0.00654526	0.0109043	0.0109043	0.571813	2.08367	2.59242	0.508746
DEF6	0.00654894	0.0395822	0.00825395	0.172106	-1.75665	-3.06454	-1.3079
RAB21	0.00655279	0.866192	0.00669814	0.00669814	0.0834351	2.01798	1.93455
UBE3A	0.00655869	0.0136007	0.0136007	0.470401	2.8384	3.75476	0.916358
PSMB6	0.00655966	0.0342933	0.00890668	0.197974	1.95247	3.28281	1.33033
RBM4B	0.00657617	0.0643976	0.00673076	0.107323	1.74088	3.44748	1.70661
WIZ	0.00657744	0.0126817	0.0126817	0.676577	2.4266	2.8514	0.424793
EDC4	0.00659247	0.133652	0.00520888	0.0516314	1.37992	3.88163	2.50171
MISP3	0.00660308	0.0140687	0.017197	0.83702	1.20051	1.30051	0.1
RIDA	0.00660509	0.0201106	0.0125297	0.330491	1.41545	2.07395	0.658496
RTN4	0.00661391	0.0453044	0.00783839	0.1523	0.943361	1.70127	0.757909
ZFYVE27	0.0066213	0.0153848	0.015452	0.778841	1.37643	1.53492	0.158496
SOX13	0.00663123	0.0114523	0.0114523	0.619971	1.32729	1.60802	0.280735
PRPF31	0.00664738	0.365245	0.00558835	0.018166	0.622295	2.92253	2.30024
RAB18	0.00665784	0.140958	0.00524256	0.049348	0.863769	2.47575	1.61198
BAIAP2	0.00665951	0.0806085	0.00618691	0.0806085	1.45937	3.13504	1.67567
BAIAP2L2	0.00666905	0.0147535	0.0147535	0.443228	1.77555	2.39254	0.616993
RPL32	0.00667022	0.0521621	0.00744532	0.133742	1.50109	2.80471	1.30362
MCM6	0.00667076	0.435227	0.00589006	0.0150558	0.761028	4.1315	3.37047
CAST	0.00668044	0.0477219	0.00775439	0.146096	1.19623	2.18319	0.98696
MCEMP1	0.00668153	0.0127709	0.0200487	0.914032	-1.75276	-1.82838	-0.0756128
STOML2	0.00670952	0.260815	0.00532678	0.0262483	0.95948	3.63051	2.67103
ATP13A1	0.00671313	0.0698478	0.00670412	0.100942	2.00156	4.03994	2.03837
GDAP1	0.0067197	0.447914	0.00599004	0.014687	0.356439	1.98636	1.62992
EXOC7	0.00672109	0.254516	0.00532284	0.0269766	1.09709	4.09541	2.99833
PROCR	0.00673552	0.0157682	0.0155374	0.420722	1.303	1.78374	0.480735
NLRC4	0.0067429	0.290802	0.00542865	0.0235013	-0.847904	-3.41332	-2.56541
SLC25A4	0.00677487	0.268761	0.00539891	0.0256609	0.737508	2.83429	2.09678
RAB20	0.006801	0.014548	0.0174463	0.83313	2.15334	2.33789	0.184549
ITPK1	0.0068098	0.0157533	0.0158291	0.780637	2.14686	2.3928	0.245943
UFSP2	0.00683408	0.0272144	0.0107597	0.256159	2.24937	3.54014	1.29077
APRT	0.00684671	0.278766	0.00548299	0.0249318	0.672254	2.6347	1.96244
TUFM	0.00687397	0.23769	0.00541701	0.0296014	0.547686	1.96682	1.41914
CPT2	0.00690003	0.706972	0.00767461	0.00896868	0.287458	3.1544	2.86694
NT5E	0.00693141	0.00849365	0.0434311	0.713682	3.3115	2.85003	-0.461471
CUTA	0.00694723	0.0434698	0.00851514	0.165769	1.58958	2.81403	1.22445
DDX50	0.00695645	0.0451821	0.00837479	0.159853	1.78396	3.18937	1.40541
SEC61G	0.00697432	0.0121687	0.0121687	0.631758	0.974983	1.17498	0.2
MCCC2	0.00698075	0.180864	0.00545881	0.0399097	1.50479	4.74325	3.23846
STK24	0.00701961	0.0756728	0.00688504	0.0971541	1.49769	3.07049	1.57281
NOP58	0.00703348	0.601423	0.00710558	0.0110124	0.276823	2.20348	1.92666
SLC33A1	0.00703525	0.669732	0.00755563	0.00972987	0.297169	2.87836	2.58119
COX6A1	0.0070383	0.022451	0.0127211	0.315178	1.30608	1.94531	0.639232
LACTB2	0.00703894	0.14487	0.00555898	0.050536	1.30218	3.74524	2.44307
AKR1C1	0.00703932	0.0968146	0.00584611	0.0761386	2.18832	5.45456	3.26624
CHD5	0.00704033	0.0314212	0.0102872	0.229362	2.13246	3.46408	1.33163
ANKRD22	0.00705267	0.0814443	0.00653939	0.0814443	1.18644	2.55945	1.37301
THOC1	0.00705716	0.543647	0.0105601	0.00728217	-0.531867	3.1511	3.68297
WDR61	0.00706473	0.906443	0.0068009	0.0068009	0.0858431	2.93412	2.84828
CRAT	0.00707414	0.0136831	0.0136831	0.498594	2.42933	3.16476	0.735425
PADI4	0.00710211	0.100191	0.00587018	0.0741552	-1.13987	-2.87024	-1.73037
CRISPLD1	0.00713588	1	0.00607301	0.00607301	0	-1.07846	-1.07846
ME1	0.00714096	0.117266	0.0057694	0.0635429	1.51088	4.01225	2.50137
CELF1	0.00714487	0.015036	0.0184082	0.842473	2.22587	2.40661	0.180735
TOM1L2	0.00718355	0.013059	0.013059	0.526541	2.76783	3.54596	0.778136
PDIA6	0.00718714	0.198402	0.00563223	0.0372579	0.460152	1.50588	1.04572
NUP88	0.00720338	0.146712	0.00569537	0.0509694	1.21677	3.50647	2.28969
IPO5	0.00721461	0.811034	0.00794421	0.00794421	0.176597	2.99548	2.81889
COMTD1	0.00722259	0.0178843	0.0156322	0.397986	2.61615	3.65058	1.03443
CACNB2	0.0072256	1	0.00614544	0.00614544	0	-1.77407	-1.77407
CHMP4B	0.00727903	0.0113997	0.0285709	0.933309	2.10014	2.03095	-0.0691878
GLO1	0.00729807	0.0631562	0.00770878	0.120342	1.44729	2.80712	1.35983
APOH	0.00730055	0.0767523	0.00639427	0.0767523	1.73025	3.98676	2.25651
TUBA1C	0.00731334	0.282643	0.00588114	0.0261283	0.372266	1.45909	1.08683
CRCP	0.00734493	0.0102641	0.034912	0.836021	1.24339	1.14339	-0.1
RAB7A	0.00734494	0.0380641	0.00979462	0.198177	1.02854	1.74306	0.714521
LEO1	0.00736874	0.0125218	0.0253358	1	1.93152	1.93152	0
MGLL	0.00737796	0.0380522	0.00985486	0.199036	2.35488	3.98746	1.63258
SNRPGP15	0.00738923	0.0143104	0.0143104	0.496784	1.63342	2.13342	0.5
TUBA1A	0.00739094	0.158076	0.00582955	0.0483556	0.53753	1.59026	1.05273
SDHA	0.00740343	0.167267	0.0058253	0.0456958	1.09824	3.32441	2.22617
HIGD2A	0.0074191	0.115409	0.00603252	0.0669138	0.949964	2.49607	1.54611
EIF3J	0.00742203	0.0217783	0.0140412	0.339607	1.81262	2.65084	0.838226
MTHFD1L	0.00743299	0.0379935	0.00996093	0.200664	2.48461	4.20016	1.71555
GART	0.00743777	0.147905	0.00589411	0.0520757	1.14565	3.29843	2.15278
COPS7B	0.0074423	0.0821626	0.00688683	0.0821626	1.61437	3.49754	1.88317
ISCU	0.00744368	0.027576	0.012025	0.272818	1.27528	1.98296	0.707682
UBE4A	0.00744654	0.909192	0.00712126	0.00712126	0.103171	3.60879	3.50561
SF3A3	0.0074829	0.745002	0.00861713	0.00909937	0.180995	2.26406	2.08306
CKAP4	0.00748602	0.328195	0.00616796	0.0227734	0.359613	1.54356	1.18395
ZNF763	0.00748652	1	0.00635585	0.00635585	0	-1.02586	-1.02586
NT5C2	0.0074984	0.614075	0.00765427	0.011418	0.312465	2.55378	2.24131
ST13P5	0.00751289	0.0865142	0.00715331	0.0905534	0.927303	1.95515	1.02785
TAF7	0.00751486	0.0157537	0.0157537	0.462113	1.52426	2.03719	0.512928
DDB1	0.00752717	0.725592	0.00850735	0.00943974	0.201529	2.33918	2.13765
NHLRC2	0.00759078	0.0128863	0.0128863	0.557772	1.60677	2.02376	0.416993
STRIP1	0.00763626	0.0165605	0.0165605	0.447702	2.17079	2.93125	0.760466
FAM122B	0.00764585	0.0136947	0.0136947	0.531649	1.39709	1.78778	0.390689
HPS5	0.00765072	1	0.00648809	0.00648809	0	-1.55627	-1.55627
FAM114A2	0.00767046	0.0553886	0.00865687	0.143209	1.79408	3.33295	1.53887
SSFA2	0.0076881	0.0217491	0.0148022	0.350583	2.62621	3.81255	1.18634
APOD	0.00770839	0.0161017	0.0161017	0.740598	2.65915	3.03057	0.371425
S100A16	0.007724	0.652227	0.00815323	0.0109527	0.340885	3.09509	2.7542
MRPL2	0.00774335	0.0123594	0.0123594	0.598559	1.37347	1.69047	0.316993
PLAA	0.00776168	0.448865	0.00692987	0.0167666	0.626316	3.43759	2.81127
SPRYD7	0.00777629	0.0887264	0.00739575	0.0911516	1.24715	2.63556	1.38842
TBC1D4	0.00778705	0.0133038	0.0133038	0.634926	2.61609	3.15532	0.539232
MRPL3	0.00779238	0.0842638	0.00674754	0.0842638	1.33117	3.12954	1.79837
OSTC	0.00780012	0.913473	0.00739769	0.00739769	0.0366465	1.33702	1.30038
PRSS57	0.00783369	1	0.0066353	0.0066353	0	-1.58377	-1.58377
CCDC126	0.00785038	0.067319	0.00823202	0.1208	1.2145	2.37073	1.15622
STX8	0.00786141	0.0412329	0.0102786	0.195011	1.74023	2.97722	1.23698
FUT5	0.00788215	0.0133485	0.0265925	1	2.13829	2.13829	0
BCAR1	0.00789218	0.0391852	0.0106131	0.205532	1.87097	3.15615	1.28517
TBCD	0.00791284	0.0854358	0.00684672	0.0854358	1.92094	4.5263	2.60536
HNF4A	0.00791848	0.0172008	0.0189215	0.816702	1.64264	1.80114	0.158496
PURA	0.00792016	0.0284924	0.0128509	0.279379	1.60548	2.48913	0.88365
HSPB1	0.00793199	0.0837464	0.00771463	0.0982993	1.56868	3.25089	1.68221
ARF6	0.00796981	0.0414602	0.0104368	0.196377	1.06295	1.81694	0.753986
CARS2	0.00797855	0.0520289	0.00935756	0.157752	1.76625	3.20645	1.44019
PRMT5	0.00799491	0.0303927	0.0125036	0.265008	2.60065	4.09409	1.49344
APOOL	0.00799869	0.0967769	0.00675674	0.0857373	1.22928	3.01156	1.78228
PPM1G	0.00804147	0.0708713	0.00831669	0.117386	1.51411	2.98708	1.47297
NTPCR	0.00808671	0.0369944	0.0113155	0.221976	1.33757	2.21305	0.875489
ETFB	0.0080917	0.0425876	0.0105015	0.193985	1.85295	3.18168	1.32873
RAB5A	0.0081139	0.260054	0.00649231	0.031433	0.627254	2.31508	1.68782
C2orf47	0.0081216	0.0798064	0.00740243	0.0798064	0.86021	1.90171	1.0415
ATP5L	0.00814491	0.0825485	0.00749183	0.0825485	1.05539	2.31043	1.25504
PSMA4	0.00814736	0.330009	0.00673544	0.0244994	0.68154	2.90598	2.22444
TUBGCP2	0.00815383	0.427472	0.00717204	0.0185247	0.749414	3.90683	3.15742
TUBB4B	0.00815505	0.191176	0.00644392	0.0435508	0.49753	1.57586	1.07833
SNX12	0.0081881	0.0419155	0.0107557	0.199085	1.96443	3.35216	1.38773
TOMM7	0.00818861	0.0279698	0.0136325	0.292751	1.64199	2.51748	0.875489
RPL15	0.00820244	0.070387	0.00854423	0.120337	1.29509	2.5424	1.24731
PHB	0.00821468	0.501185	0.00763294	0.0156458	0.381158	2.33113	1.94997
SLC25A6	0.00822133	0.234862	0.00653261	0.0354149	0.545163	1.9032	1.35804
NELFCD	0.00822915	0.0604399	0.00911556	0.14016	1.77013	3.33009	1.55996
RABGAP1	0.00824362	0.0886252	0.00711951	0.0886252	1.69285	4.01314	2.32028
BRE	0.00824517	0.251331	0.00658296	0.0330728	0.838496	3.03183	2.19334
BOP1	0.00829283	0.0864646	0.00720729	0.0864646	1.557	3.65892	2.10192
TMEM246	0.00829711	0.0172877	0.0172877	0.749422	1.70969	1.94188	0.232193
SF3B3	0.00837083	0.537595	0.00800604	0.0147212	0.406953	2.70203	2.29508
PAK1	0.0083891	0.0353568	0.012204	0.239489	2.24612	3.64825	1.40213
FAM177A1	0.00840406	0.044888	0.0107462	0.190756	1.87101	3.23719	1.36618
NCBP2	0.00848568	0.0321205	0.0131293	0.265055	1.61924	2.55847	0.939232
SH3GLB2	0.0085246	0.0312259	0.0134466	0.273342	2.09878	3.28852	1.18974
CHCHD5	0.00853185	0.0159435	0.0242592	0.921001	2.07676	2.16156	0.0847997
CSTF2T	0.00853451	0.036797	0.0122093	0.234079	1.67857	2.74703	1.06846
PDS5A	0.00854434	0.42187	0.0074906	0.0196335	0.818699	4.19383	3.37513
HIST1H2AJ	0.0086055	0.0838511	0.00850935	0.105784	0.971566	1.98991	1.01835
RBM10	0.00860684	0.082492	0.00788152	0.082492	1.6473	3.63392	1.98662
PRPSAP2	0.00861994	0.0109494	0.0462043	0.755042	2.63714	2.31459	-0.322555
NELFE	0.0086417	0.0178739	0.0178739	0.751121	2.93886	3.33721	0.398351
MNDA	0.00864446	0.0138028	0.0138028	0.61272	-2.07488	-2.5405	-0.465617
SIRT5	0.00870664	0.0146713	0.0285623	1	1.47033	1.47033	0
TMEM59	0.00871754	0.0165875	0.0165875	0.707334	1.23175	1.43175	0.2
PIGG	0.00878226	0.0380346	0.0124564	0.232638	1.57622	2.58915	1.01293
MFF	0.00888382	0.0813276	0.00808488	0.0813276	1.38422	3.0804	1.69618
SMN1	0.00889453	0.0149719	0.0290034	1	1.46793	1.46793	0
GIMAP7	0.00889792	0.315669	0.00732072	0.0278904	-0.567587	-2.32445	-1.75687
MRPS7	0.0089257	0.0671146	0.00966755	0.136176	1.66603	3.18526	1.51923
DERL1	0.0089307	0.876724	0.00884184	0.00884184	0.0800326	2.02078	1.94074
NT5C	0.00896311	0.0309058	0.0145222	0.288466	1.8841	2.91629	1.03219
ERO1A	0.00896491	0.315791	0.00737819	0.0280743	0.467975	1.91519	1.44721
TCP1	0.00902239	0.116751	0.0074951	0.0792731	0.726568	1.86733	1.14076
QDPR	0.00903932	0.0547994	0.0107254	0.167884	1.73664	3.13283	1.39619
VPS35	0.00906256	0.275584	0.00732977	0.0327721	0.522059	1.96332	1.44126
CHMP5	0.00908256	0.018396	0.0226662	0.859893	2.02621	2.17646	0.15025
C4orf32	0.00908442	0.652585	0.0110285	0.010362	-0.255488	2.03293	2.28842
SNRPA	0.00909982	0.0476056	0.0115813	0.193558	1.45232	2.51856	1.06624
MRPS22	0.00910212	0.453725	0.016346	0.00861922	-0.691164	3.10082	3.79198
PIP4K2C	0.00910319	0.129919	0.0074573	0.0717054	1.32661	3.54018	2.21357
SCYL3	0.00911629	0.0308053	0.0149051	0.293687	1.71737	2.6473	0.929921
PIH1D1	0.00914216	0.848486	0.0094059	0.0094059	0.158296	3.24761	3.08932
SUGP1	0.00915681	0.0188597	0.0188597	0.464088	1.81769	2.44437	0.626679
TMEM14C	0.00918521	0.0850881	0.00844187	0.0850881	1.02674	2.26361	1.23687
DLST	0.00918571	0.0646732	0.0101761	0.144933	1.00191	1.88715	0.88524
AQR	0.00918643	0.519356	0.00865985	0.016693	0.617171	3.8811	3.26393
MAD2L1	0.00919049	0.0200972	0.0200972	0.789942	1.39303	1.55152	0.158496
RNPEP	0.00919979	0.0350292	0.0139304	0.26218	1.39545	2.22319	0.827736
NUDCD2	0.00920315	0.0686646	0.00995243	0.136914	1.10719	2.12011	1.01293
DPH1	0.00923228	0.0326974	0.0146067	0.280726	1.67688	2.62055	0.943671
HTRA2	0.00931395	0.056524	0.0109881	0.167357	1.97463	3.57485	1.60022
VIM	0.00931989	0.0241914	0.0182035	0.375148	-0.962437	-1.38265	-0.420208
C9orf78	0.00935761	0.0144697	0.0144697	0.605904	1.59451	1.96411	0.369599
RCC2	0.00936555	0.0605565	0.010728	0.157281	2.14298	3.95073	1.80775
GPD2	0.0093713	0.0516415	0.0115593	0.183697	1.92458	3.39535	1.47076
BTF3	0.00944158	0.041332	0.0131114	0.229137	1.77539	2.94399	1.1686
AP1S1	0.00945746	0.280131	0.00767723	0.0335139	0.675402	2.55037	1.87497
HADHA	0.00947917	0.262509	0.00764794	0.0359699	0.559304	2.03465	1.47535
RHOT1	0.00948693	0.0209432	0.0209195	0.434814	2.29495	3.15435	0.859396
POLR1D	0.00948696	0.0168409	0.0168409	0.529323	1.23438	1.59287	0.358496
SEPT10	0.0094912	0.07659	0.00990909	0.126479	1.67094	3.28451	1.61357
CRK	0.00952743	0.0137431	0.0388756	0.873774	2.63229	2.46352	-0.168774
HNRNPK	0.00954206	0.215778	0.00762642	0.04444	0.525476	1.72561	1.20013
PDE2A	0.00954765	0.0201619	0.0222003	0.828775	1.72157	1.88007	0.158496
ITGB6	0.00955674	0.0197616	0.0228184	0.843323	1.8894	2.04789	0.158496
EIF3K	0.00956362	0.725139	0.0107597	0.0118322	0.268582	3.02117	2.75259
STX7	0.00956983	0.0135198	0.0404281	0.855633	1.52535	1.41358	-0.111767
HLA-DQB1	0.0096046	0.0885735	0.00954245	0.110778	-1.83368	-3.75312	-1.91944
GDF15	0.0096091	0.0161129	0.0306574	1	1.34834	1.34834	0
COQ4	0.00964415	0.0161688	0.0307376	1	1.71258	1.71258	0
DARS	0.0096442	0.130249	0.00794995	0.0754428	0.838058	2.22103	1.38298
TIMM17B	0.00967929	0.762873	0.0112726	0.0112726	0.186881	2.43562	2.24874
FDFT1	0.00972211	0.353343	0.00818402	0.0268425	1.08626	4.75196	3.6657
DNAJB4	0.00976485	0.0557533	0.0117534	0.176977	1.0881	1.94697	0.858871
TBC1D10A	0.00977087	0.0805732	0.0100775	0.123543	1.51531	3.00879	1.49348
SHMT2	0.00978659	0.307614	0.00804884	0.0313267	1.01214	4.02817	3.01603
EIF3I	0.00979897	0.120591	0.0081828	0.0827943	0.868827	2.23349	1.36466
NOP14	0.00980691	0.0200776	0.0200776	0.464716	2.37673	3.20341	0.826679
IGSF8	0.00983395	0.0278298	0.017799	0.345071	1.71409	2.53158	0.817493
XRCC6	0.00983952	0.764963	0.0114112	0.0114112	0.0971798	1.27517	1.17799
MRPL37	0.00987881	0.0184694	0.0184694	0.504147	2.389	3.13718	0.74818
HNRNPL	0.00991303	0.499728	0.0092078	0.0187117	0.311894	1.85736	1.54547
GNAQ	0.00991496	0.0644024	0.0112278	0.15594	1.53017	2.84327	1.31311
TFF1	0.00991668	0.0383723	0.0146292	0.256906	1.27885	2.05959	0.780735
CHD3	0.00996233	0.0240472	0.0202061	0.399469	2.05204	2.90163	0.849586
PES1	0.00997575	0.106567	0.00852983	0.0953882	1.4735	3.6169	2.1434
CTPS1	0.0100335	0.0452171	0.0135437	0.221928	1.93671	3.2556	1.31889
POLR1B	0.0100365	0.0613767	0.0116482	0.165232	1.89132	3.46015	1.56883
ELAC2	0.0100437	0.0139363	0.0430319	0.841399	2.4066	2.21184	-0.194753
ANP32B	0.0100658	0.015959	0.015959	0.628607	1.98115	2.41326	0.432115
KRT4	0.0101153	0.443321	0.00902132	0.0217672	0.4556	2.39129	1.93569
ARID1A	0.0101394	0.379674	0.00867715	0.0258312	1.0891	5.00221	3.91311
EMC2	0.0101574	0.809607	0.00966359	0.00966359	-0.110084	1.67077	1.78085
SRPRA	0.0101866	0.115718	0.00860628	0.0894751	1.23304	3.10632	1.87327
MED21	0.0102072	0.0584158	0.0121761	0.176018	0.965238	1.73666	0.771425
HMGCL	0.0102318	0.146527	0.00837187	0.0706665	1.28836	3.543	2.25464
GNA14	0.0102383	0.0864068	0.0104047	0.120326	1.48003	2.97763	1.4976
ESYT1	0.0102565	0.300533	0.00842495	0.0335443	0.493699	1.92474	1.43104
PRPF8	0.0102582	0.849835	0.0104669	0.0104669	0.0714407	1.45704	1.3856
CYP3A7	0.0102582	0.0171463	0.0321291	1	1.59383	1.59383	0
HSD17B11	0.0102801	0.24286	0.00828781	0.0420896	0.801394	2.76624	1.96484
OSGEP	0.0102813	0.247511	0.00829724	0.0412651	0.792999	2.7648	1.9718
TMEM30B	0.0103122	0.0874744	0.00925216	0.0874744	1.2814	2.92995	1.64856
SLC35A2	0.0103245	0.0174843	0.0174843	0.549328	1.75824	2.24702	0.488779
VRK2	0.010353	0.024193	0.0213158	0.410564	1.66941	2.3449	0.675489
IQGAP3	0.0103618	0.0582174	0.0124346	0.179002	2.31073	4.14294	1.83221
HEBP2	0.0103925	0.0342497	0.0167517	0.298123	0.923652	1.42892	0.505269
SDHC	0.0104014	0.193798	0.00836907	0.0538212	1.03092	3.1828	2.15188
DIAPH1	0.0104447	0.302492	0.00859343	0.033882	0.717682	2.8027	2.08502
EIF2B4	0.0104479	0.022142	0.0234626	0.822841	2.49389	2.73483	0.240939
SSR1	0.0104512	0.267278	0.00848729	0.0386463	0.619375	2.24745	1.62807
RPLP1	0.010497	0.514886	0.0098662	0.0190935	0.32321	1.97809	1.65488
SRRM2	0.0105051	0.171235	0.00850561	0.0617187	1.43865	4.2011	2.76245
MYO6	0.0105439	0.501843	0.00981342	0.0197295	0.83333	4.94748	4.11415
FAM8A1	0.0105477	0.0266092	0.0203872	0.382178	1.18224	1.69923	0.516993
BTF3L4	0.010549	0.0395576	0.0156432	0.263584	1.62017	2.6009	0.980735
COX5A	0.010582	0.154655	0.00864241	0.0689827	0.850601	2.37902	1.52842
RPL13A	0.0106364	0.0364578	0.0166338	0.286839	1.55456	2.43594	0.881378
PABPN1	0.0106563	0.0356689	0.0169093	0.293303	1.66632	2.59431	0.927984
DNPH1	0.0106589	0.0188578	0.0188578	0.695406	2.01202	2.36354	0.351517
GAPDH	0.0106724	0.0887437	0.0108434	0.121711	0.945106	1.90407	0.958966
NTMT1	0.0106829	0.0156088	0.0408845	0.889238	1.74885	1.64885	-0.1
ARFIP2	0.0107301	0.414442	0.00939611	0.0247587	0.669871	3.28296	2.61309
HCFC1	0.010747	0.0266862	0.0209189	0.387346	2.55483	3.66034	1.10551
SMG9	0.0107705	0.0448557	0.0149655	0.238176	2.04074	3.37917	1.33842
CCDC97	0.0108118	0.0171738	0.0171738	0.638969	1.62331	1.96925	0.345943
SARS	0.0108745	0.064793	0.0125963	0.168488	1.40922	2.58299	1.17377
AP3B2	0.01089	0.152066	0.00893518	0.0720708	1.20864	3.3443	2.13567
GNL1	0.0109539	0.0183477	0.0183477	0.552844	1.76714	2.25783	0.490689
SSB	0.010971	0.255216	0.00890344	0.0424414	0.81288	2.85681	2.04393
SMU1	0.0109891	0.317567	0.00912096	0.033729	0.766524	3.06752	2.30099
HEATR4	0.0110137	0.817404	0.0103356	0.0103356	0.0909091	-1.42608	-1.51699
ELANE	0.0110291	0.0146182	0.0496421	0.803048	-2.33589	-2.0987	0.237182
YWHAH	0.0110951	0.17738	0.00900931	0.0626057	0.452781	1.3324	0.879623
SEC62	0.0112008	0.0167588	0.0167588	0.611442	2.00947	2.47951	0.470044
CTDSP1	0.0112275	0.0173273	0.0173273	0.628396	1.35274	1.65274	0.3
NCAPG	0.0112304	0.0690344	0.0127616	0.163058	1.82946	3.3963	1.56684
AMPD3	0.0113151	0.0680166	0.0129683	0.166557	-1.92736	-3.55826	-1.6309
PSMD3	0.0113482	0.560083	0.0110512	0.0186894	0.360245	2.4308	2.07055
NGRN	0.0113498	0.0238729	0.0250258	0.824847	1.03562	1.13562	0.1
DARS2	0.0113824	0.0496226	0.0152507	0.227102	1.95193	3.29126	1.33933
MSLN	0.0114094	0.0208535	0.0208535	0.510171	2.19691	2.8888	0.691886
EFNB2	0.0114424	0.0190249	0.0347468	1	1.55785	1.55785	0
GBA	0.011452	0.097445	0.0114378	0.118321	1.94133	3.9785	2.03717
BAD	0.011466	0.0238188	0.0238188	0.793561	1.37643	1.53492	0.158496
TNPO3	0.0114719	0.656012	0.0121	0.0157707	0.499207	4.36186	3.86265
MOGS	0.011502	0.145106	0.00954352	0.0795193	0.87364	2.3548	1.48116
MAP7	0.0115273	0.0220421	0.0220421	0.489556	1.61595	2.15518	0.539232
LAMTOR1	0.0115418	0.0607937	0.0140087	0.189081	1.16691	2.07897	0.912059
DPP3	0.0115881	0.23573	0.00940215	0.048527	0.852653	2.85225	1.9996
GPR107	0.0116293	0.0193206	0.0351526	1	1.28852	1.28852	0
AVL9	0.0116423	0.0918799	0.0119138	0.127285	1.56587	3.14396	1.57809
MRPS28	0.0116501	0.0541639	0.0150195	0.213146	1.54329	2.65622	1.11293
RPL23A	0.0116573	0.0919574	0.0119289	0.127328	1.35198	2.71465	1.36267
ZDHHC3	0.0116614	0.0231587	0.0231587	0.472763	1.50034	2.02514	0.524793
ARFGAP1	0.0116691	0.110074	0.0101393	0.106649	1.61914	3.93007	2.31094
LNPK	0.0116754	0.0516915	0.0154361	0.223365	1.3115	2.2267	0.9152
CAMK2G	0.0116829	0.0487466	0.0159479	0.236416	1.74581	2.91497	1.16915
QPCT	0.0117441	0.0229584	0.0281291	0.875283	-2.26237	-2.41636	-0.153992
RAB4A	0.0117545	0.917305	0.00966005	0.00966005	-0.0616069	2.17094	2.23255
PA2G4	0.0117568	0.685376	0.0127225	0.0153428	0.260352	2.48553	2.22518
NUP43	0.0118104	0.0365169	0.0192611	0.313891	1.71228	2.62927	0.916993
PHB2	0.0118389	0.71163	0.0131166	0.0147839	0.189462	1.97492	1.78546
EXT2	0.0118404	0.0196545	0.0356088	1	1.64738	1.64738	0
TMPRSS2	0.0118545	0.0245271	0.0245271	0.455048	1.33448	1.82517	0.490689
SGPL1	0.0118688	0.178172	0.00969539	0.0663272	0.89431	2.61248	1.71817
CHMP2B	0.0118979	0.0182044	0.0182044	0.631347	1.74862	2.13607	0.387447
COG3	0.0119301	0.0964502	0.0107073	0.0964502	1.30384	3.01375	1.70992
PTDSS1	0.0120551	0.0266266	0.024919	0.42827	1.64935	2.30224	0.652888
FADD	0.0121543	0.107321	0.0119048	0.113525	0.990537	2.07191	1.08138
TUBB	0.012175	0.237405	0.00991336	0.0504261	0.497354	1.65873	1.16138
MCRIP1	0.0121877	0.0242848	0.0242848	0.779387	1.27052	1.42902	0.158496
BIN1	0.0121896	0.0194447	0.0194447	0.6572	2.10304	2.53226	0.429218
SS18	0.0122001	0.0187191	0.0187191	0.593867	1.39617	1.74536	0.349185
CALML4	0.0122042	0.025723	0.0261965	0.820653	2.32143	2.55363	0.232193
DLD	0.0122159	0.0651458	0.014592	0.186055	1.10231	1.98356	0.881258
PLIN2	0.0122225	0.976811	0.0104274	0.0104274	0.0254837	3.24789	3.22241
XAB2	0.0122421	0.0243626	0.0243626	0.470493	1.98	2.68224	0.702237
TRA2B	0.0122746	0.030076	0.023324	0.388858	2.42015	3.48655	1.0664
CDK6	0.0122779	0.0849673	0.0131022	0.144243	1.70515	3.31512	1.60997
CHI3L1	0.0123371	0.0952738	0.0114512	0.0952738	-1.40865	-3.12421	-1.71556
ANP32C	0.0123508	0.103992	0.011754	0.103992	1.03786	2.23742	1.19955
NME1	0.0124425	0.0571214	0.0159433	0.214745	0.972599	1.6795	0.7069
CLTC	0.0124467	0.870064	0.0122162	0.0122162	0.0550026	1.26221	1.20721
HMGB3	0.0124743	0.0266934	0.0262037	0.439923	1.94104	2.69022	0.749185
TUBA8	0.0124759	0.545783	0.0120185	0.0210242	0.215286	1.38567	1.17039
POLDIP3	0.012556	0.0735629	0.0143058	0.169458	1.66777	3.0948	1.42703
PFN2	0.0127257	0.0295882	0.0249222	0.407189	1.6521	2.34983	0.697728
SEC24D	0.0127859	0.055469	0.0167847	0.226305	2.04166	3.47849	1.43684
LTBR	0.0128266	0.0237638	0.0237638	0.500517	1.186	1.57669	0.390689
MBNL1	0.0128562	0.0437721	0.0193501	0.284996	1.83062	2.91053	1.07991
NDUFB5	0.0128989	0.336763	0.0108719	0.0367691	0.605582	2.46802	1.86244
TXNDC12	0.0129122	0.0987817	0.0120671	0.0987817	1.02584	2.26331	1.23747
BRAT1	0.0129242	0.0956598	0.0119717	0.0956598	1.62454	3.62319	1.99865
ATP6V0A1	0.0130119	0.292919	0.0107782	0.0429986	0.87543	3.25551	2.38008
POLD3	0.0130235	0.0251561	0.0251561	0.481577	1.85782	2.50376	0.645943
REG4	0.0130585	0.0214311	0.0214311	0.557349	1.64905	2.11343	0.464386
CTAGE1	0.0130664	0.670131	0.0139398	0.0173894	0.313081	2.80785	2.49477
CYP51A1	0.0131015	0.116166	0.0114554	0.112337	1.73971	4.23188	2.49217
CAPN1	0.0131173	0.0953291	0.0136126	0.136764	0.695281	1.38466	0.689378
ETV6	0.0131184	0.0889301	0.0139774	0.146439	1.23634	2.41032	1.17398
RRAS	0.0131206	0.493312	0.0121629	0.0246656	0.476023	2.69445	2.21843
SRP54	0.0131381	0.0450298	0.0196009	0.282791	1.97568	3.15334	1.17767
LSM8	0.0131509	0.201679	0.010778	0.0641668	0.602638	1.83528	1.23264
CLIC1	0.0131932	0.0404739	0.0210778	0.313884	0.777517	1.20229	0.424771
AP3M1	0.0131985	0.0410686	0.0208928	0.309717	1.70323	2.64466	0.941432
BSDC1	0.013209	0.620202	0.0135066	0.0191964	0.408799	3.1625	2.7537
ASNSD1	0.0132159	0.0218242	0.0385256	1	1.87997	1.87997	0
ADAR	0.0132323	0.208959	0.0108395	0.0622063	1.57038	4.85915	3.28877
YTHDF2	0.0132423	0.0370833	0.0224564	0.341808	1.47954	2.22872	0.749185
RNASE3	0.0132495	0.590664	0.0132254	0.0203479	-0.314409	-2.24617	-1.93176
PABPC1L2A	0.0132543	0.0231698	0.0355066	0.954668	1.5896	1.62883	0.0392317
KIF5A	0.0132804	0.0311927	0.025527	0.402317	2.08329	2.98102	0.897728
MCUR1	0.0132984	0.0274869	0.0274869	0.45228	1.30003	1.79072	0.490689
GHITM	0.0133798	0.0863017	0.014497	0.15352	1.35391	2.60689	1.25298
CCNK	0.0134201	0.152713	0.0112649	0.0870079	1.12774	3.03483	1.90709
TARDBP	0.0134645	0.774717	0.0151085	0.0151085	0.213449	2.80435	2.5909
EGLN1	0.0135661	0.0245146	0.0245146	0.510193	2.13393	2.82462	0.690689
MAN1A2	0.0135901	0.306018	0.0113348	0.0427403	0.678076	2.57577	1.89769
EFNB1	0.0136325	0.10702	0.0129852	0.10702	1.37077	2.9685	1.59773
EIF5AL1	0.0136333	0.0990966	0.0127049	0.0990966	1.10376	2.45241	1.34864
EDC3	0.0136419	0.113978	0.0120472	0.113978	1.27085	3.05167	1.78081
KIFC1	0.0136531	0.0225121	0.0394341	1	1.6551	1.6551	0
PDK3	0.0136574	0.0432869	0.0212018	0.303685	1.79773	2.81472	1.01699
HNRNPH1	0.0137482	0.3626	0.0117642	0.0360415	0.286622	1.22121	0.934586
FUT6	0.013752	0.0297419	0.0279126	0.433048	1.90411	2.66485	0.760733
CIZ1	0.0137575	0.0226763	0.0396499	1	1.61265	1.61265	0
GPR89B	0.0137902	0.349716	0.0117265	0.0375755	0.556413	2.30784	1.75142
MTM1	0.013853	0.0289983	0.0287996	0.445962	1.85516	2.57215	0.716993
RRP7A	0.0138615	0.0222421	0.0222421	0.677823	1.03293	1.23293	0.2
FAM213B	0.0138711	0.021709	0.021709	0.579375	2.13623	2.70551	0.569271
DNAJB14	0.0138882	0.025815	0.025815	0.496686	1.15864	1.54933	0.390689
PABPC1	0.0138957	0.32942	0.0117112	0.0403413	0.553438	2.19951	1.64607
TMEM165	0.0139158	0.114252	0.0137387	0.12067	1.3343	2.78599	1.45169
GSS	0.0139212	0.0311793	0.0274094	0.41906	0.941737	1.33304	0.391306
MYDGF	0.0139306	0.0266417	0.0266417	0.775899	1.36536	1.54199	0.176636
EPPK1	0.0139384	0.212423	0.0114638	0.0641648	1.50855	4.67071	3.16216
PPIA	0.0139914	0.0861232	0.0153464	0.160155	0.612974	1.17056	0.557586
CDC73	0.014001	0.0246807	0.0246807	0.520729	2.00215	2.63471	0.632568
CFL1	0.0140197	0.0277501	0.0311109	0.859525	1.36181	1.46935	0.107537
RERE	0.0140476	0.0210901	0.0465139	0.922752	2.04194	1.95714	-0.0847997
NUP35	0.014066	0.274003	0.0116387	0.0495952	0.686674	2.42843	1.74176
MRPS26	0.0141051	0.0232224	0.0403647	1	1.15584	1.15584	0
SNRPD3	0.0141197	0.973577	0.0112541	0.0112541	-0.0116131	1.26287	1.27449
SLC30A6	0.0141755	0.166105	0.0118609	0.0839727	0.920318	2.54399	1.62367
RABL6	0.0142006	0.026563	0.026563	0.493204	1.92731	2.58581	0.658496
HAT1	0.0142006	0.949981	0.012445	0.012445	0.038968	2.26362	2.22466
CUL2	0.0142367	0.547902	0.0137494	0.023685	0.455526	2.89558	2.44006
TMED4	0.0142587	0.655215	0.0150118	0.0193702	0.123995	1.05007	0.926074
PPA2	0.0142698	0.351264	0.0121601	0.0386053	0.489804	2.02857	1.53876
TMEM33	0.014287	0.594714	0.0188405	0.0152635	-0.414916	2.57042	2.98533
GFPT2	0.0142959	0.53456	0.0211444	0.0144732	-0.628544	3.26907	3.89762
PHF10	0.0143023	0.0235321	0.0407679	1	1.30806	1.30806	0
VTI1A	0.0143572	0.0613024	0.0185825	0.227883	1.34992	2.31752	0.967605
ABHD17A	0.0143951	0.0224434	0.0224434	0.667091	0.988801	1.1888	0.2
STAT3	0.0144211	0.916211	0.0117922	0.0117922	-0.0437748	1.47899	1.52277
PELP1	0.0145145	0.763385	0.0165007	0.0165007	0.273994	3.39236	3.11836
TMEM9	0.0145442	0.0263562	0.0263562	0.506807	1.59954	2.12808	0.52854
SELENBP1	0.0145702	0.153448	0.0123434	0.0933885	1.94659	5.18598	3.23938
STK38L	0.0145759	0.0361494	0.0262903	0.380318	1.58063	2.31462	0.733985
LSM6	0.0146012	0.0222898	0.0222898	0.657375	1.09911	1.32951	0.230401
ATXN2	0.0146669	0.0342808	0.0275868	0.401598	2.00528	2.88602	0.880735
TAPT1	0.0146757	0.395651	0.012811	0.0348586	0.641042	2.89831	2.25727
XRN2	0.0147073	0.124154	0.012911	0.116789	0.986745	2.41722	1.43048
NCAPD2	0.0147232	0.102879	0.0137916	0.102879	1.83998	4.08395	2.24397
DNM1L	0.0147679	0.0272957	0.0272957	0.4974	2.78433	3.73087	0.946539
ELF3	0.0147753	0.0253995	0.0253995	0.724912	1.22355	1.42355	0.2
ERBB2	0.0147856	0.230143	0.0122082	0.0623478	1.1249	3.5941	2.4692
APPL2	0.0148393	0.903256	0.0137951	0.0137951	0.0957708	2.87368	2.77791
TMEM205	0.0148429	0.0350551	0.0276191	0.397455	1.27359	1.84036	0.566765
SRSF3	0.0148443	0.0310594	0.0303092	0.444243	0.882235	1.2288	0.346567
FLAD1	0.0148635	0.069985	0.0181956	0.206866	2.17016	3.85074	1.68059
EEF1A2	0.0149528	0.414192	0.0132	0.0337523	0.527266	2.47156	1.9443
KRT19	0.0149572	0.702752	0.0164054	0.0186915	0.136051	1.33267	1.19662
STK26	0.0149954	0.0266025	0.0266025	0.74458	2.417	2.78169	0.364686
SEC61A1	0.0150311	0.20632	0.0124563	0.070907	1.06483	3.21634	2.15151
ITFG1	0.0150915	0.1013	0.013927	0.1013	1.34543	3.05057	1.70514
CYP3A4	0.0151046	0.0247902	0.0423924	1	1.73903	1.73903	0
UCKL1	0.0151397	0.023019	0.023019	0.660046	1.51756	1.83455	0.316993
TLN2	0.0151541	0.0247672	0.0247672	0.700307	3.15715	3.72762	0.570476
PPP1R7	0.0151615	0.049776	0.022501	0.291658	1.56711	2.50282	0.935716
STAG2	0.0151786	0.132861	0.0132179	0.11225	1.27596	3.19162	1.91565
D2HGDH	0.0152308	0.0226271	0.0498376	0.916522	2.20492	2.10492	-0.1
LYSMD3	0.0152457	0.120764	0.0149378	0.120764	0.896063	1.89379	0.997728
SYNJ2BP-COX16	0.0152917	0.109617	0.0156298	0.136927	1.32334	2.68449	1.36114
UBE2V2	0.015307	0.0239913	0.0239913	0.678401	1.95186	2.33478	0.382917
RPL8	0.0153173	0.0403355	0.0261632	0.35854	1.69828	2.54195	0.843671
LMF1	0.0153492	0.0416366	0.0256777	0.348704	1.41626	2.13915	0.722882
NEK10	0.0154359	0.0253091	0.0430559	1	1.46394	1.46394	0
IRGQ	0.0154612	0.055358	0.0217105	0.268249	1.64531	2.70154	1.05622
DAB2IP	0.0154683	0.0253598	0.0431205	1	1.17871	1.17871	0
MRPL4	0.0154692	0.0512404	0.0227351	0.288809	1.90636	3.05852	1.15216
ARHGDIA	0.0155006	0.026093	0.026093	0.539505	1.17305	1.53044	0.357384
SLC25A25	0.0155296	0.0280777	0.0280777	0.76021	1.41317	1.61317	0.2
MARVELD2	0.0155387	0.0300745	0.0300745	0.475607	1.89497	2.58445	0.689482
GATA4	0.0155462	0.0282391	0.0373449	0.91908	2.2007	2.3007	0.1
PBDC1	0.0155795	0.347288	0.0133021	0.0424008	0.64454	2.61584	1.9713
NAPA	0.0156029	0.630811	0.0160941	0.0220136	0.182867	1.42475	1.24189
CANT1	0.015608	0.0406138	0.0267592	0.362099	1.95553	2.92099	0.965464
MIC13	0.0156753	0.0311625	0.0311625	0.46391	1.30944	1.80192	0.492481
CNIH4	0.0156779	0.115887	0.0158058	0.13257	0.807182	1.66023	0.853051
MRPS23	0.0156794	0.0253676	0.0253676	0.558616	1.18212	1.52362	0.341504
ECHDC3	0.0156806	0.025692	0.0435432	1	1.31744	1.31744	0
ANXA7	0.0157007	0.884498	0.0149262	0.0149262	0.073849	1.84445	1.7706
CCDC43	0.0157243	0.0238038	0.0238038	0.66277	1.44124	1.74124	0.3
GAK	0.0157252	0.868479	0.0136208	0.0136208	-0.139022	2.91999	3.05901
C21orf33	0.0157697	0.097605	0.0169563	0.157805	1.25547	2.44149	1.18603
RTN3	0.0157945	0.350364	0.0135126	0.0425407	0.317189	1.293	0.975807
ITM2C	0.0158387	0.0259393	0.043857	1	2.01788	2.01788	0
MRPL46	0.0158541	0.168213	0.0134171	0.0918889	0.935302	2.55689	1.62158
RPS10P5	0.0158889	0.0260179	0.0439565	1	1.39084	1.39084	0
TUBB2A	0.0160449	0.981007	0.0128311	0.0128311	-0.0176984	2.63265	2.65035
UTP6	0.016048	0.0318626	0.0318626	0.463785	1.659	2.28568	0.626679
CAND2	0.0161009	0.0290034	0.0290034	0.763353	1.42583	1.62583	0.2
PEF1	0.0161019	0.200687	0.0134487	0.0777465	0.714314	2.10839	1.39408
MPC1	0.0161437	0.113759	0.01465	0.113759	1.08719	2.54191	1.45471
RNF213	0.0161525	0.0253605	0.0253605	0.686775	-3.76066	-4.48239	-0.721726
CPNE1	0.016154	0.106394	0.0169048	0.148177	1.70204	3.388	1.68596
ATP5C1	0.0161836	0.363868	0.0139472	0.0417844	0.557168	2.3273	1.77013
SRP9	0.016291	0.0484274	0.0253094	0.318743	1.18247	1.84539	0.662922
MRPL52	0.0163058	0.0266697	0.044779	1	1.0904	1.0904	0
NSUN2	0.0163071	0.0780704	0.0194836	0.202154	0.923611	1.66553	0.741918
NCF4	0.0163288	0.134949	0.0143283	0.11814	-1.37037	-3.4101	-2.03974
TRIM25	0.0163384	0.103479	0.0152083	0.103479	1.31228	2.96007	1.64779
PSMD12	0.0163521	0.249674	0.0136178	0.0628557	0.663118	2.17966	1.51655
IDH3G	0.016415	0.0534504	0.0240636	0.292318	2.23031	3.58024	1.34993
MAP2K2	0.0164355	0.0841674	0.0190149	0.189253	1.69619	3.12611	1.42992
MPHOSPH8	0.0164944	0.0313076	0.0313076	0.482357	1.5476	2.1061	0.558496
NIF3L1	0.0165014	0.0514036	0.0248237	0.304714	1.73885	2.75559	1.01674
AP1B1	0.0165166	0.117801	0.0149254	0.117801	0.900227	2.1242	1.22397
ATF1	0.0165873	0.025484	0.025484	0.583082	1.16885	1.48585	0.316993
MANF	0.0165898	0.0322097	0.0322097	0.809872	1.93027	2.14512	0.214854
PABPC4	0.0166275	0.526938	0.0158407	0.0286041	0.422093	2.49877	2.07667
FARSB	0.0166445	0.123231	0.0162964	0.123231	2.1065	4.4767	2.37021
EIF4H	0.0166946	0.0355219	0.0326197	0.434275	1.51999	2.14587	0.625873
PTX3	0.0167988	0.519259	0.0159194	0.0293542	-0.335174	-1.94623	-1.61106
FABP1	0.016807	0.0293367	0.0293367	0.751832	2.80351	3.22051	0.416993
TCEB1	0.0168086	0.0610348	0.0230162	0.26311	1.76412	2.93387	1.16975
CPSF6	0.016851	0.118382	0.0162806	0.118382	1.16716	2.51932	1.35216
HIKESHI	0.016856	0.051449	0.025559	0.310176	1.41147	2.22746	0.815987
XPOT	0.0168757	0.546834	0.0163139	0.02783	0.497548	3.08175	2.5842
TBC1D10B	0.0169274	0.0334642	0.0334642	0.464086	1.55063	2.14132	0.590689
GMPPA	0.0170079	0.134357	0.0150256	0.123178	1.2225	3.0178	1.79531
TMEM97	0.0170766	0.0241352	0.0241352	0.626768	1.81713	2.24932	0.432193
ADK	0.0171257	0.0533933	0.0255401	0.303689	1.85484	2.95053	1.09569
CCT5	0.0172133	0.0870352	0.0198772	0.190928	0.967648	1.787	0.819347
WIPF2	0.0172553	0.0419459	0.0302845	0.383226	1.17576	1.73426	0.558496
ST13P4	0.0172609	0.117138	0.0177154	0.143095	1.07306	2.17903	1.10597
PSMD11	0.0173637	0.43665	0.0156026	0.0366281	0.420601	2.02483	1.60422
GMFG	0.0173859	0.375309	0.015112	0.0432009	-0.853561	-3.61377	-2.7602
POC1B-GALNT4	0.0174117	0.100966	0.0189402	0.16689	1.56992	3.03286	1.46294
CNOT1	0.017446	0.680078	0.0197323	0.0197323	-0.296122	2.35195	2.64807
CD36	0.0174527	0.592247	0.0174655	0.0262627	-0.25896	-1.78892	-1.52996
FAM21D	0.01747	0.034725	0.034725	0.460896	1.32287	1.83397	0.511103
CAAP1	0.017521	0.0344333	0.0364101	0.856291	1.19661	1.29661	0.1
GCLC	0.0175505	0.534598	0.0168256	0.029607	0.600447	3.59207	2.99163
TRIM59	0.0175751	0.0286505	0.0472466	1	1.08244	1.08244	0
MCM5	0.0175838	0.687562	0.0190197	0.0223203	0.445547	4.05569	3.61015
LGALS2	0.017595	0.0336717	0.0336717	0.810444	1.41579	1.57428	0.158496
FUBP3	0.0176048	0.0646301	0.023738	0.259506	1.42615	2.39145	0.9653
SNRPA1	0.0176338	0.0510525	0.0273666	0.325002	1.74892	2.72722	0.978301
ATP8B1	0.0176496	0.0468634	0.0289831	0.35245	2.02321	3.07239	1.04919
NR2F2	0.017701	0.0288468	0.0474885	1	1.43089	1.43089	0
CSTF2	0.0177446	0.522345	0.0168676	0.0306937	0.457204	2.65344	2.19624
HGF	0.0177783	1	0.0144837	0.0144837	0	-1.07846	-1.07846
SAE1	0.017825	0.33576	0.0152469	0.0498092	0.658566	2.56093	1.90237
HARS	0.0179828	0.186668	0.0152764	0.0927338	0.962937	2.70404	1.74111
NME2P1	0.0180162	0.187257	0.0153035	0.0925923	0.651348	1.83116	1.17981
SGTA	0.0180463	0.874584	0.0172665	0.0172665	0.0781654	1.76393	1.68576
DDX27	0.0180556	0.0672222	0.0240391	0.255577	1.72004	2.90473	1.18469
SASH3	0.0180956	0.637105	0.0187678	0.025016	-0.366556	-2.84796	-2.4814
BET1L	0.0181765	0.0515725	0.0283804	0.330542	1.33424	2.07347	0.739232
AIFM1	0.018208	0.12727	0.0183785	0.138361	1.45701	3.01407	1.55706
VDAC3	0.0182715	0.51984	0.0275598	0.0182534	-0.306043	1.46708	1.77312
MRPL50	0.0183689	0.0257351	0.0257351	0.629145	1.6939	2.09847	0.404569
GCSH	0.0183965	0.0844996	0.0219516	0.208505	0.915868	1.6551	0.739232
CYCS	0.018445	0.0652811	0.0251444	0.267831	1.28557	2.1422	0.85663
RGS4	0.0185207	0.726414	0.0207183	0.0220004	-0.1	-1.03399	-0.933985
GATAD2B	0.0185239	0.0335399	0.0335399	0.499935	1.96874	2.65943	0.690689
STX16	0.018538	0.0499189	0.0298143	0.346699	2.2883	3.50525	1.21695
CDK11B	0.0185454	0.38963	0.0379037	0.0168075	-0.690306	2.32546	3.01576
CA9	0.0186131	0.0359149	0.0388111	0.867358	2.66286	2.86947	0.206609
EIF2B5	0.0186259	0.235958	0.0156779	0.0751883	0.884911	2.76942	1.88451
UBE2Q1	0.0186522	0.030328	0.0493009	1	1.19416	1.19416	0
SLC9A3R2	0.0186956	0.0303955	0.0493829	1	1.56829	1.56829	0
PPP2R4	0.0187667	0.0343505	0.0418394	0.906293	2.19585	2.31506	0.11921
SH3GL1	0.0187728	0.045145	0.0325249	0.384958	1.91907	2.84075	0.921675
ENO2	0.0187778	0.0784618	0.0233705	0.228113	0.942837	1.65798	0.715142
PHACTR4	0.0187894	0.0423968	0.0340776	0.408339	1.73683	2.52012	0.783289
CASC4	0.0188161	0.292621	0.0159339	0.0605865	1.09796	3.87389	2.77593
HNRNPAB	0.018868	0.116267	0.0198265	0.156205	0.80607	1.60765	0.801579
RAB17	0.0189333	0.0352211	0.0352211	0.487171	1.25687	1.71537	0.458496
PGLS	0.0189775	0.0270118	0.0270118	0.653886	2.35736	2.87871	0.521348
GOLM1	0.018983	0.217277	0.0160478	0.0833506	1.54839	4.63378	3.08539
CA2	0.0189838	0.128382	0.0172178	0.128382	1.83773	4.3804	2.54267
FNDC3A	0.0190458	0.0648836	0.0263553	0.277112	1.88778	3.11923	1.23145
RBMXL1	0.0190572	0.764532	0.0188993	0.0188993	-0.193662	2.13441	2.32807
MICU2	0.0191015	0.0291475	0.0291475	0.582003	2.07567	2.6538	0.578136
QARS	0.0191249	0.663639	0.0202742	0.0251551	0.370581	3.09022	2.71964
CCDC47	0.0191451	0.898911	0.0158622	0.0158622	-0.0842164	2.25241	2.33662
RPS25	0.0191764	0.0268647	0.0268647	0.646362	1.32015	1.62015	0.3
MIS12	0.0191802	0.0510824	0.0308288	0.349491	1.41327	2.16405	0.750779
VAT1	0.019252	0.145472	0.0170696	0.127304	0.620334	1.54966	0.92933
RAB5C	0.0192628	0.23813	0.0162603	0.0768215	0.582632	1.82298	1.24035
ACBD3	0.0193304	0.969726	0.0151317	0.0151317	-0.0296554	2.68676	2.71642
UBE2D3	0.0193423	0.139848	0.0172885	0.133054	1.0332	2.53873	1.50553
COX15	0.0193473	0.185376	0.0165854	0.0998918	0.918863	2.54354	1.62467
EPX	0.0193718	0.237647	0.0163611	0.0773855	-1.36107	-4.25047	-2.8894
IPO9	0.0193853	0.774292	0.0213287	0.0213287	0.233377	2.90803	2.67465
NPM3	0.019491	0.0764346	0.0248795	0.2418	0.967636	1.67532	0.707682
UQCRC1	0.0195734	0.336139	0.0168309	0.05426	0.466868	1.79242	1.32555
PFKM	0.0195942	0.210587	0.0166456	0.0886378	1.19823	3.51433	2.3161
ALDH3B1	0.0197199	0.0288579	0.0288579	0.674807	2.22607	2.68663	0.460565
MRPL16	0.0197838	0.0353419	0.0447815	0.922963	1.64505	1.71874	0.0736966
GNG2	0.0198016	0.0635875	0.0281243	0.292314	-1.26284	-2.05678	-0.793931
ORC5	0.0198089	0.124983	0.0182026	0.124983	1.22245	2.86412	1.64167
GLTSCR2	0.0198451	0.100788	0.0223623	0.187997	1.60019	3.01694	1.41674
FOXK1	0.0198634	0.0305813	0.0305813	0.576129	1.80119	2.31521	0.514018
WASF2	0.0199099	0.0386646	0.0386646	0.46702	1.88417	2.617	0.732835
FAM120A	0.0199884	0.0303557	0.0303557	0.697728	3.27111	3.89467	0.623559
SPCS1	0.0200588	0.134451	0.020306	0.143036	1.18438	2.4549	1.27052
RPS29	0.0200711	0.0309186	0.0309186	0.70641	1.25827	1.49047	0.232193
LSM14A	0.0200894	0.059105	0.029983	0.317247	2.02809	3.21811	1.19001
ERP44	0.0201004	0.107367	0.0221359	0.178779	0.852906	1.63791	0.785002
IARS	0.0201422	0.137699	0.0201264	0.137699	1.86322	3.91623	2.05301
SNRPG	0.0201927	0.119106	0.0213761	0.162157	1.23512	2.45343	1.2183
LOC102724159	0.0202259	0.0379977	0.0379977	0.480896	1.76536	2.42829	0.662936
PTGR1	0.0202674	0.619054	0.0207345	0.0287458	0.568199	4.12843	3.56023
RPSA	0.0202753	0.201099	0.017344	0.0959199	0.710307	2.02701	1.3167
C8orf82	0.0203002	0.0451035	0.0365272	0.412159	1.92125	2.7913	0.870044
NANS	0.0203662	0.0361395	0.0460698	0.927095	2.55199	2.66056	0.108565
LSM2	0.0203828	0.275256	0.0173087	0.0695719	0.588791	1.97918	1.39039
DNAAF5	0.0204313	0.248713	0.0173291	0.077521	1.40623	4.46332	3.05709
IGF2BP2	0.0204844	0.114855	0.022067	0.170228	1.87323	3.66621	1.79299
KIAA0368	0.0205355	0.125814	0.0213905	0.155994	1.78187	3.59501	1.81314
AMFR	0.020575	0.179983	0.0178281	0.108941	1.07427	2.90646	1.83219
COX5B	0.0205803	0.248122	0.0174671	0.0782363	0.606858	1.92155	1.31469
FAM134A	0.0206056	0.032422	0.032422	0.563847	1.42522	1.84973	0.424511
KARS	0.0206272	0.623141	0.0211734	0.0290083	0.313844	2.30038	1.98653
COQ3	0.0206678	0.0312615	0.0312615	0.584004	0.921256	1.17975	0.258496
RCN1	0.0207077	0.0437018	0.0385239	0.43165	1.32437	1.89545	0.571087
FDXR	0.0207097	0.0716899	0.0279271	0.27127	2.52653	4.23409	1.70757
SMPD2	0.0207625	0.189548	0.0179067	0.104178	0.968132	2.67764	1.70951
HNRNPD	0.0207651	0.0322263	0.0322263	0.570593	1.05193	1.35947	0.307535
ANXA6	0.0207831	0.118081	0.0222305	0.167834	-1.02715	-2.02377	-0.996624
IWS1	0.020843	0.196064	0.0179248	0.100984	0.965449	2.71073	1.74528
COA7	0.0208435	0.135442	0.0212291	0.14701	1.22597	2.53041	1.30444
NUDC	0.0209697	0.10906	0.0232031	0.182881	1.45663	2.7899	1.33327
NDUFA5	0.0210088	0.174902	0.0183184	0.114343	1.17361	3.12479	1.95118
MARS2	0.0210342	0.0448843	0.0386541	0.42685	1.43458	2.06312	0.62854
EBAG9	0.0211269	0.0356927	0.0356927	0.528137	1.44917	1.92991	0.480735
[truncated: 362 more rows]
