# Supplementary material for: Proteogenomic Landscape of Gastric Adenocarcinoma Peritoneal Metastases
Source: Research Square preprint supplement (doi:10.21203/rs.3.rs-81037/v1), 2020-10-05
Supplement: Supplementary file 3 [file 5062f034fb0f3e10c580fbee.xlsx]

## Sheet: ProteinTCE_rawData
Column 1	IPAS0980	IPAS0982	IPAS7100	IPAS0995	IPAS0979	IPAS0996	IPAS0983	IPAS0993	IPAS0999	IPAS0997	IPAS7102	IPAS0994	IPAS0998	IPAS7114	IPAS0981	IPAS7115	IPAS7107	IPAS7113	IPAS7103	IPAS7104	IPAS7116	IPAS7117	IPAS7118	IPAS7112	IPAS7105	IPAS7106
44M2	0	0	1	0	2.32193	0	0	0	0	0	0	0	0	0	0	0	0	0	0	0	0	0	0	0	0	0
A1BG	0	5.42626	0	0	3.70044	0	0	2.32193	0	0	0	0	0	0	0	0	0	1.58496	0	6.76818	0	0	0	0	4.08746	0
AAAS	3.70044	6.39232	4.08746	5.08746	7.45121	5.39232	7.02237	6.16993	3.70044	5.58496	6.64386	5.83289	2.32193	0	0	0	2.58496	0	4	0	1.58496	3.32193	3.45943	4.32193	5.75489	5.72792
AACS	5.08746	0	5.42626	6.64386	4.9542	6.02237	7	5.20945	0	0	0	1.58496	3.32193	0	0	2	0	0	0	0	1	0	0	0	6.12928	5.70044
AADACL2	0	0	0	0	2.32193	0	0	0	0	0	0	0	0	0	0	0	0	0	0	0	0	0	0	0	0	0
AAGAB	2.80735	2.32193	0	4.39232	3.70044	3.58496	3.45943	3.45943	2.58496	0	0	4.32193	0	0	0	0	0	0	0	0	0	0	0	0	3.80735	2
AAK1	0	6.18982	5.49185	0	3.16993	0	3.70044	0	2.58496	2.80735	4.08746	4.52356	3.32193	0	4.70044	4.08746	3.45943	0	2.80735	0	4.80735	0	0	0	4.9542	0
AAMDC	0	4.85798	3.32193	4.32193	0	0	6	1.58496	0	4	4.85798	2.58496	5.32193	0	0	0	0	0	0	4.52356	0	0	0	0	1	1
AAMP	0	2	0	1	3.70044	1.58496	2.80735	1	1	4.64386	0	2.32193	2.32193	0	0	0	0	0	0	0	3.58496	0	1.58496	0	1	0
AAR2	0	3.32193	2	4.39232	6.04439	4.58496	5.16993	4.16993	0	3.80735	3.45943	3.90689	0	0	0	0	0	0	0	0	0	0	0	0	4.52356	3
AARD	0	0	0	0	0	0	0	0	0	0	0	0	0	0	0	0	0	0	1	0	0	0	0	0	0	0
AARS	7.24793	6.94251	6.2854	8.60733	7.44294	8.12412	9.20212	8.47978	7.99435	5.90689	7.43463	8.81057	8.15482	0	5.72792	5.20945	5.08746	3.45943	5.04439	5.04439	6.89482	4.64386	4.90689	6.50779	8.61471	7.61471
AARS2	0	2.58496	0	3.16993	3.58496	4.24793	4.45943	5.12928	0	4.39232	3.80735	3.32193	3	0	0	0	0	0	0	0	0	0	0	0	3.70044	0
AASDHPPT	2	1	3.16993	2	2.32193	5.08746	3.70044	5	4.85798	0	2	1.58496	0	0	0	0	1.58496	0	0	0	0	0	0	3.32193	2.32193	0
AATF	0	0	1.58496	1	5.42626	1	4.08746	3.32193	1.58496	4.64386	4.45943	3.58496	2.32193	0	0	0	0	0	1.58496	0	2.58496	1	3.16993	0	0	4.32193
ABAT	0	3.80735	0	3.45943	3	0	0	3	0	4.45943	4.52356	0	0	0	0	0	0	1	0	0	0	0	0	0	4.52356	0
ABCA13	0	0	0	0	6.88264	0	0	0	0	0	0	5.90689	0	0	0	0	0	0	0	0	0	0	0	0	0	0
ABCB10	0	4.90689	4.08746	2.58496	5.75489	5.83289	4.70044	4.80735	3	2	4.16993	0	0	0	0	0	0	2.80735	3.58496	3.32193	0	0	0	0	3.70044	4
ABCB6	1	0	0	0	6.2854	4.39232	0	3.58496	0	0	1.58496	3.45943	0	0	0	0	0	0	0	0	3.16993	0	1.58496	0	3.90689	3.16993
ABCB7	0	6.53916	4.39232	6.50779	6.90689	7.17991	7.47573	7.57743	6.32193	5.93074	6.52356	6.83289	5.80735	0	0	0	5.45943	3	0	4.75489	3	1.58496	0	0	6.56986	6.98868
ABCB9	0	0	0	2.58496	2	2.32193	2	0	0	0	0	0	0	0	0	0	0	0	2.58496	0	0	0	0	0	0	1.58496
ABCC10	0	1.58496	0	0	1	0	2.80735	2.32193	3	0	1	0	0	0	0	0	0	0	0	0	0	0	0	0	0	0
ABCC8	0	0	0	0	0	0	0	0	0	0	0	0	1.58496	0	0	0	0	0	0	0	0	0	0	0	0	0
ABCD1	3.32193	7.10852	6.58496	4.39232	6.10852	6.10852	6.02237	3.32193	4.75489	5.24793	4.75489	0	1	0	0	4.16993	4.16993	4.24793	0	2	2	2.32193	0	0	3.45943	4
ABCD2	0	3.16993	2.58496	0	2.58496	2	2.80735	0	1	1	1	0	0	0	0	0	0	0	0	0	0	0	0	0	0	1
ABCD3	5.75489	6.76818	7.21917	7.24793	7.8009	8.59991	8.04985	6.18982	6.55459	6.96578	7.32193	4.75489	6.18982	0	0	2.32193	0	3.32193	7.01123	5.12928	7.87036	6.12928	6.80735	6.53916	7.61471	6.72792
ABCE1	5.67243	6.32193	4.16993	6.71425	6.10852	7.02237	6.76818	5.45943	6.37504	5.70044	5.80735	6.49185	6.74147	0	3.90689	4.08746	4.9542	2.32193	3.80735	3	3.90689	2.80735	4	4.58496	5.64386	5.72792
ABCF1	0	5.52356	5.42626	5.24793	4.58496	5.83289	7.02237	6.02237	4.80735	0	4.08746	5.04439	5.20945	0	2.58496	5	0	3.70044	0	4	0	4.16993	0	0	4.45943	2.32193
ABCG8	0	0	0	0	2.32193	0	0	0	0	0	0	0	0	0	0	0	0	0	0	0	0	0	0	0	0	0
ABHD1	0	0	0	0	1	0	0	1	0	0	0	0	0	0	0	0	0	0	0	0	0	0	0	0	0	0
ABHD10	0	6.33985	3.45943	5.72792	4.52356	5.78136	5.32193	6.37504	5.78136	4.70044	5.80735	5.04439	3.16993	0	0	5	2.80735	0	3.70044	4.64386	0	4.64386	4.16993	5.39232	5.16993	5.04439
ABHD11	1.58496	4.90689	4.08746	4.32193	7.29462	5	5.75489	4.45943	4.85798	3	6.18982	6.82018	2.80735	0	2	0	0	0	6.47573	4.45943	0	3	2.32193	3.90689	4.24793	4.52356
ABHD12	4.45943	6.9542	3.16993	5.72792	4.70044	6.44294	7.16993	7.39232	4.16993	0	5.61471	4.39232	4.80735	0	0	4.45943	5.75489	4	7.40088	3.16993	3.70044	3.16993	5.16993	4.58496	4.85798	6.06609
ABHD13	0	0	2.80735	2.32193	2	3.16993	1	2	0	2.58496	1.58496	1	2	0	0	0	0	0	2	1.58496	0	0	0	0	0	1.58496
ABHD14A-ACY1	0	0	0	0	3.90689	5.55459	0	5.20945	0	3.70044	6.39232	4.24793	2.58496	2.80735	0	0	2.32193	0	0	0	3.45943	2	0	0	4.52356	4
ABHD14B	3.32193	6.94251	4.45943	5.39232	5.12928	6.08746	5.80735	5.61471	5.97728	2.58496	5.16993	5.52356	4.52356	0	4.08746	1.58496	4.39232	2.58496	4.45943	4.32193	1.58496	1.58496	3	0	5.12928	5.20945
ABHD16A	0	7.45943	5.80735	2.58496	1.58496	5.85798	6.16993	6.87036	2.32193	5.42626	5.75489	5.16993	5.58496	0	0	3.45943	3	0	5.80735	0	2.80735	3.45943	2	4.85798	5.52356	4.64386
ABHD17A	0	0	0	1.58496	2.32193	0	0	1	2	1	2.58496	3	0	0	0	0	0	0	0	1.58496	0	0	0	0	0	0
ABHD17C	0	0	0	1.58496	0	4.24793	4.08746	5.70044	3.90689	5.24793	5.70044	3.16993	4.32193	0	0	2.32193	0	0	2.32193	4.75489	0	0	0	0	3.70044	3.90689
ABHD2	0	0	0	0	1	0	0	0	0	1.58496	0	0	0	0	0	0	0	0	1	0	1	4	1	0	0	0
ABHD3	0	0	2.32193	0	5.04439	0	1.58496	1	0	0	5.64386	0	0	0	0	0	0	0	0	0	2.58496	0	0	0	2.32193	1
ABHD6	0	4.70044	4.64386	0	6.10852	4.45943	4.85798	4.45943	1	3.32193	4.52356	0	0	0	0	0	1	0	0	2.32193	0	0	0	0	4.24793	2
ABLIM3	0	0	2.58496	0	1.58496	0	0	0	0	0	0	0	0	0	0	0	0	0	0	0	0	0	0	0	0	0
ABO	2.32193	0	0	0	2	0	0	0	2.80735	0	0	0	0	0	0	0	0	0	1	0	0	0	0	0	0	0
ABR	5	7.45943	6.50779	4.08746	5.42626	7	6.90689	5.20945	4.64386	5.55459	4.08746	5.45943	5.35755	0	0	4.58496	0	4.70044	4.08746	3.70044	3.32193	3.80735	4.08746	5.16993	5	2.80735
ABRACL	1	5.52356	3	2.32193	2	2.32193	4.39232	2.80735	3.45943	2	2.32193	2	2	3	3	3.45943	2.32193	2.80735	2.32193	2.58496	3.16993	1	1.58496	0	2.80735	2.32193
ABTB2	0	1	0	0	3.32193	0	0	0	0	0	0	0	0	0	0	0	0	0	0	0	0	0	0	0	0	0
ACAA1	4.16993	8.64024	6.33985	6.65821	8.16993	7.22882	6.59991	7.63662	5.35755	6.65821	7.07682	6.58496	7.3837	0	3.90689	6.78136	6	4.52356	7.93664	4.75489	4.16993	7.17991	3.45943	3.16993	6.61471	6.58496
ACAA2	7.26679	8.96	8.40088	2.58496	7	9.66356	8.45121	9.30378	6.80735	7.5157	10.0348	8.32193	8.91886	0	7.31288	7.78136	7.15987	7.34873	7.10852	4.16993	3.45943	6.71425	5.97728	8.42626	7.70044	9.37938
ACACA	5.2854	0	5.39232	0	4.24793	9.01681	3.90689	0	7.18982	0	0	0	0	3.90689	0	3.32193	0	0	0	3.16993	0	0	5	0	0	3.16993
ACACB	3.80735	3.32193	0	0	5	6.89482	0	0	5.39232	0	0	0	0	0	0	0	0	0	0	0	5.16993	0	0	0	4.75489	2.58496
ACAD8	3	0	0	0	3.16993	0	0	4.64386	0	1	0	3.45943	0	0	0	0	0	0	5.70044	0	0	0	0	0	0	0
ACAD9	5.35755	7.48382	5.83289	5.61471	6.91886	7.11894	7.89482	8.0607	6.18982	6.85798	7.2384	6.33985	5.04439	0	2.58496	3.32193	5.08746	5.61471	6.6865	5.24793	5.04439	4.80735	6.06609	5.75489	6.44294	5.52356
ACADM	3.80735	6.52356	6.2854	6.37504	6.71425	5.32193	4.08746	6.32193	5.52356	6.20945	4.75489	5.45943	5.75489	3.32193	4.90689	4.90689	5.2854	5.32193	6.02237	0	5.58496	4.90689	5.55459	0	4.58496	5.67243
ACADS	3.58496	5.9542	6.02237	0	5.24793	7.45943	5.55459	7.33092	5.83289	6.94251	7.13955	2.80735	3	0	2	3.58496	4.70044	2.32193	5.75489	6.78136	4.64386	4.16993	0	0	5.12928	5.72792
ACADSB	0	4.24793	4.32193	6.44294	3	5.2854	5.16993	6.42626	6.40939	4.08746	5.64386	4.80735	3	0	0	2	0	2.58496	4.08746	1.58496	2.32193	2.32193	2	2.58496	0	5.2854
ACADVL	9.02237	9.52552	9.42417	8.78136	10.1137	10.6366	8.8009	9.75656	9.56796	9.66711	10.0821	10.0553	9.88874	6.96578	6.9542	7.8392	9.21675	8.30378	9.94251	8.15987	8.15482	8.25267	8.27612	7.04439	9.49785	8.88874
ACAP2	0	6.39232	4.80735	5.2854	3.16993	9.7879	5.85798	5.80735	6.55459	0	0	0	3.80735	2.58496	5	0	0	0	0	0	0	0	0	0	0	5.04439
ACAT1	5.08746	8.27146	7.65821	6.2854	8.27146	7.14975	6.35755	8.43463	6.62936	6.78136	7.48382	7.91886	7.21917	2.80735	6.37504	6.32193	6.02237	6.18982	7.61471	5.45943	4.70044	4.58496	5.75489	6	7.44294	7
ACBD3	3.45943	5.08746	0	5.83289	3.58496	5.35755	5.52356	5.2854	5.70044	1.58496	3.70044	4.08746	5.08746	0	0	2.58496	0	3.45943	4.75489	0	5.16993	5.24793	2.58496	3	4.24793	2.80735
ACBD4	0	1.58496	0	0	0	0	3.80735	0	0	2.32193	2.80735	0	2	0	0	0	0	0	0	0	0	1.58496	0	0	0	0
ACBD5	2.58496	6.04439	4.70044	7.16993	4.9542	4.39232	7.12928	6.26679	5.42626	5.9542	6.72792	5.55459	6.14975	0	0	0	0	0	5.78136	6.2854	3.58496	5.16993	0	0	3.45943	5.08746
ACBD6	0	0	0	0	2.32193	0	0	0	0	0	0	0	0	0	0	0	0	0	0	0	0	0	0	0	0	0
ACD	2.32193	0	0	1	2	0	0	0	0	0	0	0	0	0	1	0	0	0	0	0	0	0	0	0	0	0
ACER3	0	0	0	0	1	0	0	0	0	0	0	0	0	0	0	0	0	0	0	0	0	0	0	0	0	0
ACHE	0	0	0	1	1	1.58496	0	0	0	0	5.75489	0	0	0	0	0	0	0	0	0	0	0	0	0	0	0
ACIN1	0	6.50779	3.70044	6.08746	8.02237	6.20945	7.16993	6.61471	3.90689	4.80735	8	6.24793	4.52356	0	3.45943	3.90689	0	0	4.16993	5	0	6.22882	0	5.24793	5.2854	6.85798
ACLY	8.54303	9.86264	8.35755	9.49785	7.94251	9.10591	8.71081	8.37504	7.7211	7.33985	6.76818	8.18982	8.12928	0	6.22882	7.49985	7.74819	7.94251	6.79442	4.52356	6.52356	7.07682	9.50184	7.30378	8.98584	8.52748
ACO2	6.04439	8.85175	7.93074	7.74147	9.92481	9.10329	8.43463	8.49586	7.54689	8.48784	9.14975	7.60733	7.92481	4.45943	6.16993	7.75489	5.85798	7.50779	8.50779	7.2854	7.02237	7.49985	7.35755	5.45943	8	7.96
ACOT1	0	3.16993	1	0	3	2.32193	4	4.90689	2.80735	0	4.70044	2.58496	0	0	2.80735	0	0	0	2	0	5.08746	3	0	1.58496	3	1
ACOT13	0	2	0	0	1	0	2	2.32193	0	0	2	0	0	0	0	0	1.58496	0	2.80735	0	0	0	0	0	4	3
ACOT2	2.32193	4.85798	2	0	4.80735	1.58496	5.35755	5.75489	2.80735	0	5.12928	0	0	0	1	2.58496	0	0	4	0	5.55459	4.70044	0	3.16993	4.90689	0
ACOT7	0	0	3	5.2854	4.64386	0	6.53916	6.62936	4.85798	2	6.12928	3.90689	0	0	0	0	0	0	0	0	4.32193	0	0	0	6.53916	2.80735
ACOT8	0	1.58496	0	2	6.35755	2.80735	0	2	1.58496	0	4.64386	1.58496	0	0	0	0	0	0	3.80735	0	0	0	0	0	0	0
ACOT9	0	7.76818	6.61471	0	6.2854	7.09803	6.20945	7.56224	6.16993	4.58496	5.04439	1.58496	4.9542	0	4.32193	0	5	5.08746	6.22882	0	4.32193	0	0	0	5.24793	7.17991
ACOX1	7.42626	7.29462	6.49185	7.52356	9.12928	8.84235	9.19229	7.69349	7.88264	7.6865	8.76487	7.8009	7.18982	4.45943	4.9542	3.16993	5.70044	4.70044	8.99435	7.22882	7	5.97728	5.32193	4.80735	6.55459	7.3837
ACOX2	1	2.32193	0	0	6.39232	3	0	0	0	0	0	0	0	0	0	0	0	0	0	0	0	2.32193	0	0	0	0
ACOX3	4.45943	6.18982	2	4.16993	4.32193	6.32193	5.49185	4.70044	5.35755	3.70044	6.12928	2.58496	3.58496	0	1.58496	0	4.52356	5.08746	6.50779	4.70044	3.70044	0	3.16993	0	4.64386	4.9542
ACP1	5.39232	5.70044	5.85798	6.74147	5.61471	6.39232	6.65821	6.24793	2.80735	7.07682	6.02237	7.06609	6.35755	0	4.58496	5.39232	2.80735	1	4.32193	5.88264	0	4.45943	2.80735	1.58496	6.35755	5.72792
ACP2	0	8.97728	8.42206	4.70044	4.16993	6.98868	7.19967	7.04439	4.32193	4.24793	6.06609	1.58496	3.90689	0	0	4.24793	6.59991	2.32193	4.45943	4	3	0	0	0	7.39232	5.35755
ACSBG2	1.58496	0	0	0	2.32193	0	0	0	0	0	2	0	0	0	0	0	0	3	0	0	0	0	0	0	0	0
ACSF2	1.58496	7.16993	5.04439	0	0	6.16993	5.55459	5.90689	3	4.70044	0	0	1	0	3	0	3.16993	0	7.34873	3.45943	5.35755	6.47573	5.32193	0	3.32193	3.80735
ACSL1	6.84549	10.8424	10.2784	3.90689	6.08746	7.12928	6.37504	8.43879	7.62205	8.18488	7.86419	5.67243	6.24793	6.56986	5.04439	7.50779	7.57743	8.53138	8.57365	5.16993	6.80735	3.58496	4.45943	5.16993	8.15482	7.34873
ACSL3	4.58496	6.04439	4.75489	7.34873	8.30378	7.39232	7.67948	6.64386	6.14975	5.35755	7.40939	5.93074	6.56986	0	0	3.70044	0	3.58496	6	3.90689	3.70044	6.47573	4.52356	5.35755	6.56986	4.58496
ACSL4	1	7.44294	4.9542	0	2.80735	4.32193	4.45943	5.12928	4.85798	0	4.45943	3.32193	1	0	3.16993	4.24793	3.58496	3	4.39232	0	3.16993	5.32193	0	0	2.80735	1.58496
ACSL5	6.39232	6.78136	8.14975	2.80735	6.47573	7.08746	8.79116	8.9571	7.09803	8.40939	9.76984	6.26679	6.55459	0	2	4.32193	2	1	4.16993	6.61471	4.08746	5.9542	0	0	5.16993	8.71768
ACSM2A	0	0	0	0	0	0	0	0	0	2.80735	0	1.58496	0	0	0	0	0	0	0	0	0	0	2.80735	4	0	0
ACSM6	2	0	0	0	1	0	0	0	0	0	0	0	0	0	0	0	0	0	0	0	0	0	0	0	0	2.80735
ACSS1	0	4.64386	1	0	6.14975	7.48382	5.35755	5.12928	5.52356	7.30378	5.2854	6.24793	3	0	0	0	0	3.45943	3.80735	2.32193	0	4.45943	3.32193	0	3.80735	6.10852
ACSS2	0	3.70044	0	5.16993	4.52356	6.2854	4.08746	0	4.58496	0	5.35755	4.80735	0	0	0	4	0	0	0	2	0	0	0	0	4.24793	2.80735
ACSS3	0	0	2.32193	0	3.16993	0	0	0	3.90689	0	0	0	0	1.58496	0	0	0	0	0	0	0	0	0	0	0	0
ACTA1	10.0688	10.6874	10.8933	10.4645	10.5285	10.3815	10.4737	9.69523	10.1176	10.5167	10.0182	10.196	10.341	8.8009	10.1254	9.5216	9.73809	9.64205	9.09803	9.57175	8.7879	9.17742	9.02237	8.33985	10.3729	9.66178
ACTA2	7.90087	9.32418	0	6.84549	8.30378	8.93664	9.12153	6.53916	7.05528	0	8.47573	8.71768	5.9542	0	9.26444	6.55459	6.64386	0	3.70044	8.18982	4.75489	5.42626	7.01123	0	9.33762	8.32193
ACTB	10.6193	11.9701	11.568	10.821	10.6883	10.9204	11.245	10.4179	10.5353	11.1196	10.9241	10.7305	10.8049	9.44087	10.8494	10.007	10.5353	9.9263	9.82814	9.98014	9.02514	9.89633	9.56986	8.21917	10.9823	10.5177
ACTBL2	8.76487	9.23122	8.90689	8.69697	8.61839	8.96	8.7211	8.07682	8.48784	8.3443	8.41785	8.62205	8.58871	7.20945	8.50779	7.80735	8.25739	7.89482	7.35755	7.71425	6.59991	7.11894	7.36632	6.37504	8.82972	8.10329
ACTC1	9.01959	9.91439	7.53138	8.48382	9.47978	9.48985	9.70736	8.08746	7.90087	5.12928	9.18488	9.09276	5.20945	6.71425	9.55075	8.36632	8.21432	8.30378	7.14975	8.35755	6.87036	7.13955	7.81378	6.78136	9.65105	8.61839
ACTG1	11.6497	12.4202	12.0895	11.5058	11.6506	11.5803	11.7616	10.8281	11.2963	11.7524	11.4558	11.4553	11.4157	10.2456	11.6658	10.7993	11.3998	10.8595	10.6175	11.03	10.0334	10.3208	10.4543	9.66534	11.6515	11.2767
ACTG2	10.5565	11.2533	11.1312	10.6008	10.5765	10.6393	10.7507	10.0835	10.4471	10.8376	10.4147	10.5584	10.6421	9.0607	10.6466	9.80896	10.23	9.93221	9.56415	9.71939	9.03342	9.3966	9.25739	8.35755	10.69	9.99435
ACTL6A	4.80735	6.50779	3.58496	5.88264	6.55459	5.75489	6.78136	6.9542	5.58496	4.32193	4.80735	5.90689	3.90689	0	4.9542	2.32193	3.16993	5.55459	3.16993	0	5.04439	5.49185	4	4.08746	5.16993	2.58496
ACTN1	11.032	10.6502	10.0512	10.5622	11.0382	11.2738	11.5236	10.2866	10.3298	10.6064	10.8796	10.242	10.3476	10.792	10.8376	9.71425	10.115	10.4009	9.97871	9.19722	10.196	9.81538	9.90839	9.73471	9.90388	10.0471
ACTN2	8.65821	8.40939	8.10852	7.59246	8.37069	9.01681	8.86419	8.24793	7.61471	8.57365	8.19967	7.60733	7.39232	7.96578	7.87036	7.11894	7.11894	8.02791	7.26679	7.57743	7.82018	7.64386	7.7211	6.50779	7.78136	7.45943
ACTN3	7.6865	8.18982	7.75489	7.66534	8.29462	8.66178	8.44294	7.76818	6.6865	8.19967	7.81378	7.83289	7.30378	7.37504	7.33985	7.48382	6.70044	7.46761	6.84549	6.82018	7.2384	7.74147	7.54689	6.40939	7.56224	7.50779
ACTN4	11.5708	10.9873	10.6475	11.3454	11.0189	11.7495	11.8333	10.8074	10.8564	11.5216	11.1072	11.1163	10.8796	9.91588	11.1085	9.75322	9.91737	10.3945	10.2633	10.3219	10.3987	10.4115	10.4988	9.81538	10.5603	10.8122
ACTR1A	6.67243	8.23362	7.12928	7.33985	5.90689	6.08746	7.02237	7.25739	6.40939	5.32193	5.83289	5.39232	6.08746	0	6.12928	5.97728	5.83289	6.37504	5.49185	4.75489	4.64386	4.16993	5.61471	4.32193	6.14975	5.75489
ACTR1B	3.45943	6.64386	5.35755	5.9542	4.85798	5.35755	5.58496	5.55459	5.08746	3.90689	4.16993	4.39232	4.80735	2	5.04439	2.80735	3.70044	4.39232	4.16993	3.90689	2.58496	1	2.80735	0	4.58496	3.70044
ACTR2	8.43045	10.1293	9.4818	8.24793	8.91289	8.56224	8.8857	8.27146	7.74819	8.61102	8.03892	8.10329	7.93074	6.12928	8.64746	8.21432	8.0607	8.58496	7.34873	7.8392	7.16993	6.83289	7.44294	6.67243	8.38802	8.10329
ACTR3	8.633	10.1523	9.783	8.62205	9.19967	9.16993	9.03892	8.58496	8.29462	8.6865	8.93369	8.47168	8.43045	6.84549	8.51175	8.53528	8.633	8.64024	7.97154	8.44708	7.64386	7.39232	7.82018	7.35755	8.97728	8.58871
ACTR3B	2.58496	7.04439	6.2854	5.49185	5.70044	5.93074	5.49185	4.90689	3.80735	5.16993	5.72792	5.78136	5.75489	3.90689	3.70044	4.64386	4.9542	4.85798	2.80735	5.16993	4.70044	2	3.58496	3.70044	6.02237	5.39232
ACTR3C	5.75489	6.50779	6.12928	5	5.70044	5.45943	4.58496	3.45943	4.85798	5.20945	4.75489	5.2854	4.58496	4.16993	3.80735	5.2854	4.75489	4.39232	3.58496	4.32193	4.90689	4.08746	4.52356	2.58496	5.93074	4.85798
ACTRT1	0	0	0	0	0	0	0	0	0	0	0	0	0	0	0	0	0	0	0	0	0	0	0	0	0	0
ACY1	3.70044	0	3.70044	3.70044	5.08746	7.80735	4.24793	6	0	4.39232	8.224	5.32193	3	2.32193	1	0	2	0	0	0	0	0	0	0	4.90689	5.45943
ACYP1	1.58496	0	0	2.32193	1.58496	1.58496	3.58496	1.58496	0	1.58496	2.80735	1.58496	1.58496	0	0	0	0	0	0	0	0	0	0	0	2.80735	3.58496
ADA	0	6.26679	3.16993	0	4.70044	0	2	0	2.58496	0	0	0	2.80735	0	5.24793	0	4.58496	0	0	0	0	0	0	0	0	0
ADAL	0	1.58496	0	0	0	0	0	0	0	0	0	0	0	0	0	0	0	0	0	0	0	0	0	0	0	0
ADAM10	2.80735	7.09803	6.70044	0	4.45943	6.24793	8.5157	7.5157	5.97728	5.85798	7.76818	4.70044	4.75489	3.90689	1	4.16993	3.90689	4.45943	3.45943	6.10852	2.80735	4.80735	5	3.70044	6.18982	4
ADAM9	4.90689	7	5.72792	4.70044	9.21432	8.00562	8.40939	7.52356	5.42626	6.10852	7.89482	6.08746	7.19967	0	0	5.16993	1	4.32193	5.9542	5.42626	3.16993	5.67243	0	5	6.50779	4.32193
ADAMTS17	0	0	0	1	0	0	0	0	0	0	0	0	0	0	0	0	0	0	0	0	0	0	0	0	0	0
ADAMTSL5	0	0	3.32193	0	0	0	1	0	0	0	0	1.58496	0	3.80735	0	0	0	0	0	0	0	0	0	0	0	2.58496
ADAR	0	8.12412	6.91886	8.50779	8.04985	7.96578	7.7211	8.90087	7.30378	5.64386	7.86419	7.59246	6.83289	0	4.64386	5.70044	0	0	4.24793	0	7.33985	7.21917	0	4.90689	7.5157	7.12928
ADAT1	0	1	0	0	3	0	0	0	0	0	0	1.58496	1.58496	0	0	0	0	0	0	0	0	0	0	1	0	0
ADCK5	0	0	1.58496	0	3.16993	2.58496	4.64386	3.58496	0	3.45943	0	0	0	0	0	0	0	0	3.90689	2	0	2	0	0	2	0
ADCY10	0	0	0	2	0	0	0	0	0	0	0	0	0	0	0	0	0	0	0	0	0	0	0	0	0	0
ADCY4	0	0	0	0	2.32193	0	0	0	0	2.80735	0	0	1.58496	0	0	0	0	0	0	0	0	0	0	0	0	2.58496
ADD1	5.08746	7.7879	5.08746	2	6.72792	7.18982	8.40514	7.39232	5.90689	5.90689	5.97728	4.08746	5.72792	3.70044	4.64386	2.80735	3	4.24793	4.52356	5.32193	4	6.06609	4.52356	2.80735	7.22882	5.80735
ADD3	0	5.24793	0	0	4.39232	3.70044	7.21917	4.70044	4	2.80735	4.64386	0	0	0	4.16993	0	0	3.16993	0	4.16993	0	4.08746	5.2854	0	4.39232	0
ADH1A	0	0	0	0	5.85798	5.78136	0	0	4.24793	2	4.24793	0	0	0	0	0	0	0	0	0	5.90689	4.70044	0	0	0	0
ADH1B	0	0	0	0	6.2854	6.42626	0	2.32193	4.85798	2.58496	4.08746	0	0	0	0	0	0	0	0	0	4.80735	4.39232	0	0	0	0
ADH1C	0	0	0	0	7.65821	7.42626	0	2	5.52356	6.49185	5.75489	0	0	0	0	0	0	0	2	4.16993	6.49185	6.22882	0	0	2.80735	0
ADH5	1.58496	5.9542	1	3.45943	6.53916	6.90689	6.20945	5.78136	4.64386	3.58496	4.64386	1.58496	1	0	2.80735	3.70044	0	2	0	3	1	4.9542	3.45943	1.58496	6.61471	3.90689
ADH6	0	0	0	0	2.58496	3.45943	0	0	1	0	0	0	0	0	0	0	0	0	0	0	0	0	0	0	0	0
ADI1	0	4.24793	1	4.32193	4.58496	4.58496	5.61471	3	0	3	5.55459	5.12928	2.80735	0	0	2.32193	2.32193	0	3.16993	1.58496	0	0	0	0	4.32193	3
ADIRF	0	0	0	4.16993	1.58496	2	0	1	0	5.45943	2.32193	1.58496	0	0	3.58496	0	0	0	0	0	1	0	0	0	0	0
ADK	0	2.80735	3.32193	5.58496	4.80735	5.08746	3.90689	5.04439	0	0	3.45943	5	1.58496	0	0	0	3.16993	0	0	0	3.32193	0	0	3.32193	4.52356	4.9542
ADM	0	0	0	0	1.58496	0	0	0	0	0	0	0	0	0	0	0	0	0	0	0	0	0	0	0	0	0
ADORA2A-AS1	0	0	0	0	1.58496	0	0	0	0	0	0	0	0	0	0	0	0	0	0	0	0	0	0	0	2.58496	0
ADPGK	5.12928	8.8392	7.2384	5.49185	7.35755	7.05528	8.18982	7.07682	3.16993	4.75489	6.90689	5.67243	4.9542	0	2.32193	5.93074	5.90689	5.83289	6.88264	4.52356	3.16993	5.88264	3	4.08746	6.12928	6.35755
ADPRHL2	0	5.32193	4.16993	4.24793	4.32193	4.08746	3.32193	3	2	3	2.80735	3.45943	4.45943	0	3.90689	0	1	2	0	0	1.58496	0	2	0	4.24793	2.58496
ADRM1	0	3.16993	1	3.32193	1.58496	4.9542	4.24793	2.32193	3.45943	2.80735	3.45943	4.16993	3.90689	0	0	0	1	0	0	0	0	0	0	0	3.16993	2.32193
ADSL	6.82018	5.90689	6.61471	1.58496	5.52356	6.58496	6.53916	4.75489	4.90689	0	5.08746	4.52356	0	0	0	4.39232	3.70044	0	3.80735	0	0	0	0	0	7.57743	7.21917
ADSS	4.16993	5.12928	3.80735	7.24793	4.32193	6.04439	5.61471	4.80735	5.20945	2.32193	3.45943	6.26679	5.75489	0	3.32193	0	3.32193	0	3.16993	3	3	2.32193	0	0	5.80735	5.58496
ADSSL1	0	2	1.58496	3.16993	0	1.58496	0	4.08746	2.58496	0	2.58496	0	2	0	0	0	0	1.58496	0	0	0	0	0	0	2	0
AFDN	0	0	0	6.49185	7.59991	6.70044	10.0458	7.56224	3.80735	5.78136	6.26679	4.08746	5.70044	4.75489	0	0	0	0	6.67243	6.32193	0	6.37504	5.61471	5.32193	5.9542	4.32193
AFF3	0	0	1	0	1	0	0	0	0	2.58496	0	0	0	0	0	0	0	0	0	0	0	0	0	0	0	0
AFG3L2	2.32193	5.70044	4.08746	5.16993	7.98299	6.79442	8.2854	7.13955	4.80735	6.6865	8.36194	7.08746	6.30378	0	0	4.16993	2	2	6.40939	5.39232	3.90689	3.90689	5.49185	4.90689	5.45943	6.76818
AGAP5	0	0	0	0	0	0	0	0	0	0	0	0	0	0	0	0	0	0	0	0	0	0	0	0	0	0
AGBL2	0	0	0	0	2	0	0	3	0	0	0	0	0	0	0	2	0	0	0	0	4.32193	0	0	0	2.32193	0
AGFG1	2	5.35755	4.90689	2	5	4.58496	5.42626	5.55459	4.52356	4.52356	5.35755	4.39232	3.45943	0	2.80735	4.45943	3.16993	4.45943	0	0	3.16993	3.58496	4.45943	0	4.24793	3.90689
AGK	0	4.45943	4.16993	0	3.80735	2.80735	5.55459	5.97728	1.58496	4.70044	5.85798	0	0	0	1	3.16993	1.58496	3.16993	0	0	0	3.32193	2.80735	0	4.80735	4
AGL	3.32193	5.45943	0	4.64386	5.97728	6.61471	6.98868	0	5.04439	4.16993	3.90689	0	3.32193	0	0	0	3.32193	0	3.90689	0	0	4.9542	4.64386	5.08746	6.53916	0
AGMAT	0	0	0	0	4.16993	5.35755	5.24793	3.80735	4.64386	4.75489	4.9542	4.08746	1.58496	0	0	0	0	0	0	0	0	0	0	0	3	3.58496
AGO1	0	6.06609	1	0	2	0	3.16993	0	2.58496	0	0	0	0	0	0	0	0	0	0	0	0	0	0	0	0	0
AGO3	0	0	0	0	2.58496	0	1.58496	0	0	0	0	0	0	0	0	0	0	0	0	0	0	0	0	0	0	0
AGPAT1	1	3.16993	3	3	3.32193	2.58496	4.16993	3.58496	3.90689	3.45943	3.32193	3.80735	3.58496	0	0	0	0	0	0	1.58496	2	3	1.58496	0	3.58496	2
AGPAT2	1	2.80735	3.70044	4.32193	4.39232	5.49185	5.35755	4.52356	2.58496	5.08746	5.64386	5.08746	4.75489	0	0	0	1	0	3.45943	4	0	0	0	0	3.58496	4.39232
AGPAT5	2	3.58496	5.52356	5.78136	4.85798	5.67243	6.35755	5.42626	4	6.06609	5.88264	7.15987	3.80735	0	0	0	0	0	0	4.9542	0	3.16993	0	3.80735	4.16993	4.85798
AGPS	4.32193	7.18982	5.2854	1.58496	6.70044	5.90689	7.57743	8.15987	7.15987	6	5.64386	6.62936	5.70044	0	3.45943	5.12928	4.08746	5.49185	6.24793	0	5.16993	5.08746	6.02237	3.16993	5.55459	5.70044
AGR2	7.53138	3.58496	8.17493	9.73978	10.1163	10.4471	11.1118	9.28309	8.9629	9.5157	9.56033	9.88417	10.0861	0	3.32193	7.2854	4.16993	0	8.53138	10.1636	6.82018	7.59246	2.80735	7.24793	10.2372	9.53138
AGR3	5.35755	1	5.12928	5.61471	5.32193	4.85798	8.02791	6.89482	6.58496	7.96	7	7	6.78136	0	1	0	0	0	4.16993	6.39232	3.32193	0	1.58496	5.32193	5.20945	5.75489
AGT	0	3.45943	0	0	3.58496	1	0	0	0	0	0	0	0	0	0	0	2	2.80735	4.45943	6.76818	0	0	0	0	2	0
AGTR2	0	0	0	0	2	0	0	0	0	0	0	0	0	0	0	0	0	0	0	0	0	0	0	0	0	0
AGTRAP	1.58496	5.04439	4.45943	3	3.70044	2.80735	0	4	4.08746	2.32193	2.58496	1.58496	3	2.80735	0	1.58496	2.80735	4.08746	5.24793	0	2	1.58496	0	0	3.45943	2
AHCTF1	5.12928	0	0	0	5.35755	6.18982	5.16993	0	0	0	0	3.80735	0	0	0	0	0	0	0	0	0	0	0	0	5.20945	0
AHCY	7.71425	7.45943	6.18982	8.99435	7.40088	8.91588	9.16993	8.09803	8.43463	8.16491	7.77479	8.42206	7.13955	0	4.39232	4.64386	5.24793	5.08746	4.39232	6.83289	4.90689	4	5.97728	6.02237	8.58496	7.89482
AHCYL1	0	4.64386	0	3.32193	1.58496	6.22882	2.80735	0	5.24793	3.16993	4.45943	1.58496	3.90689	0	0	2.32193	0	0	0	2.32193	0	0	0	0	3.80735	0
AHNAK	9.60177	11.3337	9.54882	9.57554	9.65642	10.151	10.9381	10.058	8.28077	10.3343	10.1984	8.45533	8.94544	0	10.0539	9.69523	8.67596	9.21917	9.25739	9.89482	8.13955	9.13955	9.17243	5.9542	8.66178	8.45533
AHSA1	6.33985	6.55459	6.10852	5.08746	6	7.08746	8.03892	5.80735	5.49185	4.70044	6.76818	7.03342	5.61471	0	4.16993	3.70044	4.45943	4.32193	3.32193	0	6.2854	4.16993	5.83289	5.83289	6.61471	5.55459
AHSG	5.16993	5.67243	4.24793	2.58496	2.80735	3.32193	4.32193	6.16993	5.2854	2.32193	4.85798	4	4.85798	4.45943	4	4.39232	0	6.56986	5.16993	6.9542	3	5.24793	4.32193	0	3.45943	0
AIFM1	5.49185	8.38802	5	7.32193	7.72792	9.35094	8.89178	8.64386	7.29462	6.88264	8.31288	7.2854	6.71425	1	4.45943	6.76818	5.2854	5.42626	8.17493	3.16993	3	5.45943	4.24793	6.40939	7.98299	9.31967
AIG1	0	2	0	0	0	0	0	0	0	0	0	0	0	0	0	0	0	0	0	0	0	0	0	0	1	0
AIMP1	5.39232	5.08746	4.75489	6.10852	6.33985	5.42626	7.2854	5.93074	1.58496	5.78136	5.35755	7.08746	6.16993	0	3	1	4	1	5.20945	3	3.45943	3.16993	3.32193	4.08746	5.39232	5.42626
AIMP2	4.85798	6.37504	4.08746	6.88264	6.58496	6.94251	6.59991	6.06609	6.33985	4.80735	4.70044	6.96578	5.08746	0	0	2.32193	3.32193	1.58496	4.75489	1.58496	2.80735	2.32193	2.80735	4.85798	6.47573	5.88264
AIP	0	6.40939	3.70044	1.58496	3.45943	5.12928	5.52356	5.61471	0	3.45943	5.75489	5.04439	4.08746	0	5.9542	0	3.16993	0	0	0	0	0	0	0	3.58496	4.32193
AJUBA	0	0	3.45943	0	2.58496	2.58496	0	0	0	1.58496	0	1.58496	0	0	0	0	0	0	0	0	0	0	2	0	0	0
AK1	2.58496	2.32193	0	5.88264	5.90689	6.56986	6.02237	6.47573	2.58496	6.76818	5.42626	6.37504	2.80735	0	0	0	2.32193	0	3.58496	5.42626	1	0	0	0	4.9542	4.45943
AK2	7.37504	9.79116	8.37504	8.65464	8.92778	9.69	9.25503	9.41785	7.10852	8.92778	9.45738	8.82972	9.06878	6.62936	8.18488	6.53916	7.59991	7.39232	7.54689	3	5	5.97728	7.41785	7.46761	8.20945	9.62753
AK3	2.32193	4.32193	3.45943	1	6.10852	6.53916	4	5.35755	5.83289	3.80735	4.64386	2	4.75489	0	3.70044	2.32193	3.80735	3	4.90689	0	2.32193	3.16993	1	4.64386	3.58496	4.39232
AK4	2	0	0	4.9542	4.90689	3.70044	4.58496	3.32193	4.52356	3.16993	2.32193	4.39232	5.35755	0	0	0	0	0	0	2	0	0	4.64386	0	4.45943	4.52356
AKAP1	0	0	2.58496	4.39232	4.90689	6.94251	8.61839	6.50779	4.90689	4.75489	7.45121	6.2854	4	0	0	0	0	0	0	0	0	0	3.45943	0	3.16993	6.06609
AKAP13	0	7.55459	0	0	5.90689	4	6.76818	6.85798	0	0	4.24793	4	4.58496	5.42626	4.70044	3.45943	0	0	6.35755	3.45943	0	0	0	0	0	0
AKAP7	0	0	0	0	1	0	1	1.58496	2.32193	0	3.16993	1	4	0	0	0	0	0	1.58496	2.32193	0	0	1.58496	0	0	0
AKAP8	0	1	1	3.70044	2.58496	3.16993	5.16993	5.35755	3.32193	4.52356	5.2854	5.32193	3.70044	0	0	3.80735	0	0	0	0	0	0	0	0	3.90689	4.58496
AKAP8L	2.80735	5.04439	2.80735	4.52356	3.58496	4.70044	5.88264	5.42626	2	4.90689	4.85798	0	4.08746	0	0	4.08746	0	2.32193	5.32193	0	0	4.80735	2.80735	0	2	4.58496
AKIRIN1	0	0	0	0	1	1	2	0	0	0	0	0	0	0	0	0	0	0	0	0	0	0	0	0	1.58496	0
AKR1A1	5.55459	7.81378	6.88264	6.52356	5.72792	7.71425	7.34873	6.87036	5.97728	6.18982	5.58496	5.93074	6.74147	1.58496	4.39232	6.02237	5.83289	5.24793	2	2.32193	5.08746	4.70044	4.39232	2.80735	5.93074	5.85798
AKR1B1	4.45943	6.85798	4.32193	0	6.59991	4.24793	2.32193	5.52356	5.45943	0	6.16993	3.45943	3.70044	0	3.32193	0	5.72792	3.58496	5	0	4.90689	3.32193	2.58496	0	4.58496	3.45943
AKR1B10	0	0	4.85798	0	9.96	7.73471	4.32193	2.80735	4.64386	7.48382	8.14466	5.12928	3.45943	0	2	0	0	0	3.45943	0	7.85798	6.37504	0	0	5.49185	1
AKR1B15	0	0	4.64386	0	9.24317	7.04439	1.58496	2.80735	3.16993	6.91886	7.41785	5.12928	3.80735	0	2.32193	0	0	0	3.32193	0	7.47573	5.64386	0	0	4.45943	0
AKR1C1	0	0	4.90689	0	10.2597	6.70044	6.12928	5.20945	4.64386	5.08746	5.90689	3.45943	6.33985	0	0	0	0	0	0	4.08746	9.18239	9.02237	0	0	4.90689	6.82018
AKR1C2	0	0	4.52356	0	9.63662	5.80735	3.70044	4	3.16993	4.32193	5.08746	0	5.97728	0	0	0	0	0	0	1	8.71768	9.21917	0	0	2.80735	4.80735
AKR1C3	0	4.58496	4.70044	0	10.7541	8.23362	8.53138	6.70044	4.90689	7.88264	7.65821	5	7.78136	0	0	0	0	0	0	5.9542	9.64746	9.02237	2.80735	0	6.10852	8.25267
AKR1C4	0	0	0	0	7.07682	4.16993	2.80735	2.58496	0	2.80735	3.32193	1.58496	4.24793	0	0	0	0	0	1.58496	2	6.93074	5.93074	0	0	1.58496	4
AKR1D1	0	0	0	0	2.32193	1.58496	0	2.80735	0	0	0	0	0	0	0	0	0	0	0	0	0	3.45943	3	0	0	0
AKR7A2	4.64386	5.88264	4.08746	4.80735	2.32193	6.64386	5.16993	4.75489	5	3.70044	5.24793	4	5.35755	0	2.80735	3.80735	4.85798	2.80735	0	0	2.32193	4.24793	1	1	5.72792	3.32193
AKR7A3	3	0	0	4.58496	5.45943	6.45943	4.9542	2.80735	4.75489	4.16993	5.80735	5.78136	3.80735	0	0	0	0	0	0	0	0	0	0	0	6.02237	3.70044
AKR7L	0	2.58496	0	2.58496	2.32193	4.75489	2.58496	2.32193	2.32193	0	5.32193	3.45943	3.16993	0	0	0	1.58496	0	0	0	0	0	0	0	4.39232	0
AKT1	2.32193	0	0	4.70044	2	3.90689	1.58496	0	0	0	3.70044	0	0	0	2	1	0	2.80735	0	0	0	0	0	0	2	0
ALAD	3.16993	5.75489	1.58496	6.30378	3.58496	5.52356	5.55459	4.70044	3.90689	5.20945	4.64386	4.32193	3.80735	0	2.80735	2.58496	3.16993	3.80735	2.80735	5.49185	2	2.32193	2.32193	0	5.12928	4.39232
ALB	11.3072	13.3629	11.8533	10.1459	12.6693	12.4727	12.6303	12.3824	11.0835	10.8001	11.719	11.0126	11.8025	9.62936	11.8134	11.8853	10.6926	11.2497	12.5505	12.7209	10.865	12.1173	11.42	9.98299	12.0116	10.6221
ALDH16A1	0	8.40514	7.3837	7.25739	5.70044	7.42626	5.67243	7.39232	5.70044	6.75489	6.18982	7.47573	3.45943	0	3.58496	5.42626	4.45943	3.45943	3.32193	4.45943	0	0	0	0	6.20945	2.80735
ALDH18A1	6.9542	5.49185	4.24793	7.57743	7.30378	8.47573	7.14975	8.67948	7.86419	7.11894	8.41785	7.98299	8.13955	0	3.70044	0	2.58496	0	7.03342	5	6.90689	7.14975	5.45943	7.45943	6.89482	8.96867
ALDH1A1	7.48382	6.04439	6.9542	3.90689	10.1561	9.85643	7.86419	5.75489	8.55459	7.88264	7.85798	6.14975	6.89482	0	0	6.14975	5.52356	4.85798	0	3.16993	9.8933	8.31288	7.82018	4.75489	8.98014	7.65821
ALDH1A2	0	6.24793	0	1.58496	3.80735	5.49185	0	5.12928	4.64386	0	5.12928	1	2.32193	0	0	0	0	0	0	0	4.39232	2.80735	4.16993	0	4	7.40939
ALDH1A3	0	4.16993	0	0	4.32193	4.08746	0	2.58496	4.24793	3	3.80735	3.45943	3.16993	0	0	0	0	0	0	0	4.58496	5	2	1	0	3.32193
ALDH1B1	0	4.16993	3.16993	2.58496	7.22882	5.61471	6.9542	5.55459	6.72792	5.24793	6	6.22882	4	0	2.32193	2.32193	3.58496	0	0	2.80735	3.90689	4.16993	2.32193	5.58496	4.80735	7.39232
ALDH1L1	0	2.80735	0	0	2.58496	0	5.35755	0	0	0	0	0	0	0	0	0	0	1.58496	8.21432	0	0	4.64386	0	0	2.32193	6.14975
ALDH1L2	0	0	0	0	2.32193	0	2.80735	3.80735	0	0	0	0	0	0	0	0	0	0	0	0	0	0	0	2	1	3.16993
ALDH2	7.7211	10.1319	9.14211	8.21432	9.03342	10.0661	8.59991	9.36632	9.42417	9.10852	9.70044	8.62571	7.85798	4.80735	6.32193	8.16491	7.70736	8.19476	4.75489	6.16993	8.45943	8.07682	7.49185	6.94251	8.3966	8.52356
ALDH3A1	0	0	0	2	6.12928	7.18982	4.24793	4.9542	0	8.07146	4.64386	5.12928	5.32193	0	0	0	1.58496	0	1	2.58496	7.05528	8.79766	0	1	5	3.58496
ALDH3A2	1.58496	7.97728	7.34873	6.12928	9.47776	7.19967	8.31288	6.98868	3.16993	7.08746	7.63662	7.56224	7.45943	2.58496	0	4.64386	4.52356	5.12928	6.16993	6.87036	5	6.98868	5.39232	4.52356	7.22882	8.36194
ALDH3B1	0	6.37504	4.45943	0	4.39232	3.90689	3.90689	6.12928	0	3.45943	6.52356	2.32193	1	0	1.58496	0	0	2.32193	0	3.70044	0	1.58496	0	0	0	2.80735
ALDH3B2	0	2	0	0	1	1	1	2.58496	0	1	2.80735	0	0	0	0	0	0	0	0	1	0	0	0	0	0	0
ALDH4A1	0	3.45943	0	6.88264	2.58496	6.12928	4.70044	5.24793	4.58496	4.64386	5.52356	5.64386	5.20945	0	4.45943	3.90689	4.75489	3.90689	4.58496	0	5.12928	2.58496	0	3	5.83289	2
ALDH5A1	0	0	0	0	4.64386	0	4.64386	4.85798	4.80735	0	5.83289	4.64386	3.32193	0	0	0	0	0	6.32193	0	4	0	0	0	0	3
ALDH6A1	0	6.32193	0	6.82018	4.80735	6.02237	3.32193	5.72792	2.58496	0	3	4	6	0	0	0	0	0	4.9542	3.16993	2.80735	1.58496	2.58496	0	2	3.90689
ALDH7A1	5.45943	7.20945	3.16993	7.93664	7.92481	7.56986	8.90989	8.8857	7.52356	8.37069	9.45533	8.29002	8.85487	3.58496	0	2.58496	2.58496	2.58496	7.02237	7.74819	5.72792	6.74147	4.16993	7.16993	8.69349	8.65105
ALDH9A1	0	7.33092	5.32193	6.61471	7.2384	6.85798	4.24793	6.90689	6.47573	6	5.42626	5.85798	6.30378	0	3.58496	3.58496	5.24793	4.39232	3.45943	4.80735	4.75489	3.80735	3.58496	3	6.64386	4.75489
ALDOA	11.1548	11.06	10.9651	12.5861	11.3038	11.9028	11.6353	10.5755	10.098	11.599	11.3343	10.9337	11.8037	7.57743	10.4747	9.91439	9.13443	9.71425	10.2808	10.6528	10.0861	10.403	8.17493	8.03892	10.4594	10.1611
ALDOC	6.84549	7.42626	5.78136	7.60733	7.05528	8.15482	7.96	3.70044	5.67243	5.45943	7.35755	5.35755	7.61471	2.32193	5.9542	6.58496	5.78136	5.16993	6.93074	5.16993	7.12928	7.35755	0	7.22882	5.88264	5.93074
ALG1	3.90689	6.12928	3.58496	3.58496	4.90689	6.26679	6.14975	6.22882	4	4.45943	5.45943	3.90689	2.80735	0	0	3.32193	0	1.58496	0	1	3.16993	2.80735	2	1	6.2854	5.90689
ALG11	0	3.32193	0	3	4	3.90689	4.24793	2.80735	2.32193	0	2	0	0	0	0	0	0	0	0	0	0	1	0	0	2.58496	0
ALG13	0	2.80735	0	1.58496	1.58496	1	4.32193	3.45943	1	1.58496	4.58496	2.32193	1.58496	0	1.58496	0	0	0	4.08746	0	0	0	2	0	4.39232	0
ALG14	0	1.58496	0	0	2	2.32193	3	0	0	0	0	0	0	0	0	0	0	0	0	0	1	0	0	0	0	0
ALG2	0	5.9542	3.32193	2.58496	5.16993	6.74147	6.39232	5.61471	3.70044	3.16993	6.16993	0	0	0	0	3.16993	3.70044	2.58496	3	3.32193	0	0	2.32193	0	4.24793	2.80735
ALG5	2	5.2854	4.80735	6.20945	6.58496	5.49185	5.72792	5.64386	4.80735	5.04439	5.97728	5.24793	6.20945	0	0	2.58496	2.80735	2.58496	0	5.20945	2	2.32193	0	3.16993	5.78136	5.08746
ALG8	1	0	0	0	0	1.58496	1.58496	0	0	0	1	0	0	0	0	0	0	0	2.32193	0	0	0	0	0	0	0
ALG9	0	4	4.16993	4.45943	4.08746	4.9542	3.32193	4.75489	4.52356	4.45943	5.24793	4	3.80735	0	0	0	0	0	5.45943	3.90689	0	0	0	0	4.24793	2
ALOX12	0	0	0	0	1	0	0	0	0	0	0	0	2	0	0	0	0	0	0	0	0	0	0	0	0	0
ALOX5	6.44294	10.5718	8.33092	0	6.04439	5.67243	7.04439	7.25739	7.2384	6.35755	7.61471	4.16993	5.61471	7.37504	6.22882	7.71425	7.96	8.22882	7.36632	6.70044	7.12928	5.58496	6.78136	0	7.02237	6.80735
ALPI	2.80735	0	0	0	4.24793	3.45943	0	0	0	0	0	0	0	0	0	0	0	0	0	0	2	0	3	0	0	0
ALYREF	0	4.39232	4.52356	5.08746	4.90689	4.24793	5.52356	4.52356	1	4.80735	4.08746	4.52356	4.75489	0	0	4.39232	1.58496	0	4.52356	3.90689	2.32193	4.16993	0	2.58496	1	2.32193
AMOTL2	0	0	2.32193	0	2.58496	0	0	1	0	5.24793	0	0	0	0	0	0	0	0	0	3.32193	0	0	0	0	0	0
AMPD1	0	0	0	0	4.70044	0	0	0	0	0	0	0	0	0	0	0	0	1.58496	1	1.58496	0	0	0	0	0	0
AMPD2	0	7.31288	3.32193	1.58496	2.58496	5.85798	4.39232	5.52356	5.2854	4.75489	0	0	0	0	0	4.85798	2.32193	5.35755	0	0	0	0	4.39232	0	4.75489	3
AMT	0	0	0	1.58496	2	0	1	4.80735	1.58496	0	1	2.32193	0	0	0	2	0	0	0	0	0	0	0	0	0	0
ANAPC10	0	0	0	0	0	0	0	1.58496	0	0	0	0	0	0	0	0	0	0	0	0	0	0	0	0	0	0
ANAPC11	0	1	0	0	0	0	0	0	0	0	0	0	0	0	0	1	1.58496	0	0	0	0	0	0	0	0	0
ANAPC16	0	1.58496	0	1	2.80735	0	2.58496	2.58496	2	2.32193	1	2.32193	2.32193	0	1	0	0	0	0	0	0	0	1.58496	0	0	2.80735
ANAPC4	3.45943	5.04439	0	0	2.32193	5.39232	4.45943	0	0	0	0	4.52356	0	0	0	0	0	0	0	0	0	0	0	2.80735	1	0
ANAPC5	3.16993	5.49185	0	0	5.08746	4.64386	6.58496	5.70044	1.58496	0	5.88264	4	0	0	0	0	0	0	0	0	0	3.32193	0	0	4.08746	2.32193
ANAPC7	0	0	2.32193	0	4.90689	4.24793	5.58496	4.9542	1.58496	3.58496	3.45943	3.70044	0	0	0	0	2.32193	0	1.58496	0	2.32193	3.58496	4.16993	3.90689	2.32193	3.16993
ANK1	0	0	0	0	8.20945	3.16993	4	0	2	0	4.80735	0	0	0	0	5.70044	0	8.10852	9.52356	5.45943	1.58496	0	0	0	0	0
ANK2	0	3.16993	0	3	6.50779	3.70044	4.9542	6.78136	1	0	5.16993	5.72792	3.80735	0	0	0	0	0	1	0	0	6.58496	0	0	0	4.80735
ANK3	0	5.88264	3.58496	6.20945	6.88264	4.52356	0	6.56986	0	0	0	4.32193	4.39232	0	0	0	2.80735	3.58496	4.52356	0	0	0	6.44294	2.80735	6.32193	5.39232
ANKFY1	3.80735	5.2854	5.52356	4.39232	0	5.49185	0	4.24793	6.22882	0	0	5.58496	4.24793	0	3.58496	3.45943	5.83289	5.90689	0	0	0	0	3.58496	0	5.9542	0
ANKIB1	0	0	0	0	0	0	2.58496	0	0	0	0	0	0	0	0	0	2.80735	0	0	0	1.58496	0	0	0	0	3.16993
ANKLE2	1	1.58496	0	3.70044	4.45943	1	5.04439	5.12928	0	0	2.80735	4	0	2.80735	0	2	1.58496	0	1.58496	0	3.45943	3.16993	0	2	0	2.80735
ANKRD18B	0	0	0	0	2	0	0	0	0	0	0	0	0	0	0	0	0	0	0	0	0	0	3	0	0	0
ANKRD22	0	3.90689	5.2854	2	2.32193	4.08746	4.70044	5.52356	4.24793	4.08746	5.78136	4	3.45943	0	0	2.80735	2.32193	2.32193	3.70044	3.58496	1.58496	2	2.32193	2	3.58496	5
ANKRD27	0	0	1.58496	0	0	0	4.24793	1	0	0	0	0	0	0	1.58496	2	0	0	0	0	0	0	0	0	0	0
ANKRD29	0	0	0	0	1.58496	0	0	1.58496	0	0	0	0	0	0	0	0	0	0	0	3.70044	0	0	0	0	1	0
ANKRD46	2	0	0	1.58496	3.45943	0	3.45943	0	0	0	0	0	0	0	0	0	1.58496	0	0	0	2.32193	0	0	0	1.58496	0
ANKS3	0	1	0	0	0	0	1.58496	0	2	0	0	0	0	0	0	0	0	0	0	0	0	0	0	3.16993	3.58496	0
ANKUB1	0	0	0	0	2	0	0	0	1.58496	0	0	0	0	0	0	0	0	0	0	0	0	0	0	0	0	0
ANLN	0	0	0	1	5.2854	0	5.80735	0	2.32193	0	2.80735	1.58496	0	0	0	0	0	0	2	0	0	0	0	0	0	0
ANP32A	5.39232	7.06609	5.67243	2.58496	5.90689	6.02237	6.79442	6.24793	5.20945	6.76818	5.61471	6.14975	6.14975	4.64386	5.32193	5.67243	5.12928	4.16993	5.2854	5.32193	3.16993	6.30378	5.08746	3.16993	6	5.32193
ANP32B	4.32193	6.06609	4.9542	5.04439	5.85798	6.72792	6.56986	5.93074	4.08746	5.83289	4.75489	5.52356	4	3.58496	4	4.52356	2.58496	0	3.58496	3.16993	0	3.16993	3	0	4.52356	5.45943
ANP32C	2.32193	4.75489	1	0	4	1.58496	4.90689	2.80735	2.80735	4.08746	3.32193	3	3.16993	0	1.58496	1	0	1.58496	2	3.90689	0	2.32193	2.32193	0	2.80735	3
ANP32D	3	4.52356	2	1.58496	4.08746	0	4.58496	3.32193	2.58496	4.64386	3.70044	3.32193	3	0	0	0	1.58496	0	0	3.90689	2.32193	3.80735	2.80735	0	2.32193	2.58496
ANP32E	0	5	3.16993	4.58496	5.78136	3.32193	3.70044	4.9542	3.80735	5.49185	2.58496	4.9542	3.45943	4	4.08746	4.90689	3.45943	3.45943	4	0	5.32193	5.93074	4.64386	3.45943	5.67243	1
ANPEP	6.75489	7.49185	0	0	9.41785	9.35975	5.08746	6.44294	7.63662	8.57743	10.2866	0	4.64386	0	0	4.52356	5.78136	7.37504	6.67243	2.80735	1	7.43463	6.96578	1.58496	6.12928	3
ANXA1	10.128	10.733	10.0014	5.67243	7.19967	9.31741	9.56986	8.77149	8.98014	9.44501	8.15482	7.54689	9.56033	8.92481	10.0928	9.19722	8.89178	9.59059	9.74819	2.80735	9.08215	8.86419	9.47776	7.85798	8.58496	7.70044
ANXA10	7.33985	0	3.58496	3.58496	5.78136	6.72792	7.39232	5.75489	5.80735	7.13955	6.59991	6.80735	6.49185	0	0	0	0	0	0	5.64386	4.45943	0	0	3.80735	5.39232	0
ANXA11	6.88264	7.85175	5.32193	4.90689	5.67243	7.43463	6.83289	7.85798	7.97154	4.85798	6.40939	6.12928	6.47573	6.12928	6.97728	6.50779	5.70044	6.49185	5.9542	4.85798	6.83289	6.76818	6.50779	5.97728	6.2854	5.93074
ANXA13	0	3.70044	0	0	8.21432	3.45943	6.72792	5.20945	3.70044	8.62571	8.19476	6.22882	1	2.58496	2.32193	3	1.58496	0	2	0	1.58496	1.58496	0	5.70044	0	3
ANXA2	12.7926	13.5241	12.7288	10.5718	13.0386	12.8545	13.2832	12.8232	12.1354	13.0972	12.6713	12.3493	12.711	8.14975	12.2963	12.3923	11.1059	12.3468	12.2854	12.27	11.115	12.4921	11.7147	10.2131	11.599	11.2592
ANXA2P2	9.40939	9.87805	9.17742	7.2854	9.51175	9.2503	9.72281	9.25974	8.67948	9.44294	9.1267	8.83605	9.20701	4.75489	8.76487	8.84862	7.76155	8.81057	8.73132	8.73809	7.81378	8.94251	8.2854	7.14975	8.12412	7.77479
ANXA3	8.37504	6.52356	5.67243	5.35755	7.56986	9.60733	9.45738	7.92481	9.0634	6.53916	8.71768	7.53916	9.31967	8.23362	8.14975	6.02237	4.08746	7.09803	7.85175	6.02237	8.224	5.42626	7.80735	6.93074	6.47573	8.14975
ANXA4	9.98014	9.96145	8.86728	8.10852	9.55459	11.7661	10.4625	10.6573	10.7952	10.6119	10.3587	9.37938	10.6733	7.5157	8.35755	8.56224	8.04439	8.49185	9.01402	9.44501	9.45738	10.3576	9.35975	8.84235	9.01402	9.16742
ANXA5	9.49185	11.23	10.4543	9.58496	9.73978	9.29692	10.1241	9.21675	8.42626	8.12928	9.43671	7.72792	9.51964	7.2854	8.84235	9.9571	9.65105	9.41996	8.22882	9.14211	8.41363	9.56033	8.8392	8.09276	10.0348	9.10852
ANXA6	9.79604	11.7364	10.6502	10.6475	7.79442	8.29002	7.93664	10.1421	9.60363	7.85798	8.09803	8.31288	9.20457	9.29232	11.265	10.2715	10.4009	10.8849	8.02791	5.16993	8.30834	8.54689	10.2491	7.65105	9.69349	8.93664
ANXA7	6.56986	7.13955	6.16993	6.08746	4.9542	6.33985	5.49185	7	6.44294	5.42626	5.58496	5.12928	6.52356	0	4.85798	4.70044	5.08746	5.2854	4.90689	6.10852	4.52356	5.52356	6.04439	5	5.24793	5.49185
AOC3	0	2.32193	0	0	1.58496	0	2.80735	0	0	0	1	0	0	0	0	0	2.32193	0	0	0	0	0	1.58496	0	0	0
AOX1	0	0	0	0	3.90689	0	4.16993	0	0	0	0	0	0	0	0	0	0	0	0	0	0	0	0	0	0	0
AP1B1	7.01123	10.6402	10.4656	7.86419	9.15735	9.35315	9.70044	9.55267	7.8009	9.31515	9.55267	8.16993	7.62936	6.02237	4.90689	6.88264	8.04439	7.93074	7	8.56986	7.6865	6.93074	6.58496	6.06609	9.62753	8.83289
AP1G1	6.9542	7.16993	5.61471	5.12928	4.52356	6.50779	6.93074	6.9542	6.32193	3.45943	6.78136	5	5.42626	0	3.16993	0	6.12928	4.75489	5.32193	4.80735	6.10852	0	4.24793	0	7.46761	5.70044
AP1M1	0	8.7039	7.7211	5.35755	7.72792	5.35755	7.87652	6.93074	5.75489	5.08746	6.22882	6.35755	4.32193	0	0	4.45943	5.24793	4.80735	5.20945	4.90689	0	4.90689	2.80735	4.39232	7.12928	5.67243
AP1M2	4	5	3.16993	5.61471	4.32193	7.20945	8.38802	7.08746	6.26679	5.61471	6.98868	6.96578	6.80735	0	0	0	1	0	6.39232	6.55459	3.90689	4.16993	4.16993	4.32193	7.24793	6.40939
AP1S1	5.39232	3.45943	2.58496	1.58496	3.58496	5.90689	5.04439	2.58496	3.45943	3.90689	5.12928	4.75489	2.32193	0	2.58496	2.80735	0	1.58496	4.08746	4	1.58496	1.58496	1.58496	3.32193	5.64386	4.58496
AP1S2	1.58496	6.52356	4.85798	0	3.58496	3	1.58496	4.39232	0	0	2.32193	1	0	0	0	3.80735	3.32193	3.16993	0	0	0	0	1	2	5.20945	2
AP1S3	0	0	0	0	2.80735	0	0	0	1	0	3.90689	0	1	0	0	0	0	0	0	2.80735	1.58496	0	0	0	0	0
AP2A1	6.71425	9.07682	8.19476	6.91886	6.87036	8.47978	8.74819	8.59246	7.41785	7.18982	7.64386	6.9542	7.06609	0	4.24793	6.2854	7.18982	5.58496	6.97728	7.27612	6.76818	5.64386	5.20945	5.42626	7.84549	7.2854
AP2A2	6.40939	10.7649	10.0403	7.26679	9.01681	8.87652	9.9542	9.41785	7.22882	8.3837	8.47168	7.97154	8.2854	0	4	8.0607	8.94544	7.34873	8.224	8.12928	5.80735	8.10329	6.42626	5.78136	9.2854	8.12928
AP2B1	7.48382	10.7969	10.1824	7.64386	9.3015	10.1849	10.7549	10.2562	8.55459	9.1267	9.81218	8.91588	7.83289	3.58496	5.80735	7.13955	8.10852	8.15987	7.77479	9.60918	8.12928	7.60733	7.64386	6.87036	9.77479	9.21432
AP2M1	4.70044	8.45121	6.88264	4	6.20945	6.55459	7.11894	7.36632	4.39232	4.52356	6.40939	5.83289	6.78136	0	1.58496	4.75489	5.61471	4.45943	5.97728	5.32193	4.16993	4.45943	1	4.08746	7.75489	6.89482
AP3B1	4.85798	6.70044	6.45943	6.76818	5.85798	5.90689	6.78136	6.12928	4.70044	5.04439	6.22882	6.2854	5.64386	0	1	2.32193	2.80735	3.16993	5.83289	5.75489	4.45943	0	0	5.24793	6.89482	5.97728
AP3B2	4.45943	5.55459	5.72792	5.64386	5.35755	4.80735	5.42626	3.90689	2	4.70044	4.85798	3.70044	0	0	0	2	0	2.32193	2.80735	3.80735	0	0	0	4.32193	5.12928	4.08746
AP3D1	5.97728	8.75822	6.10852	6.39232	6.65821	6.84549	7.99435	5.9542	5.70044	4	5.45943	0	5	2.58496	3.16993	5.08746	5.20945	5.83289	5.78136	5.20945	6	0	5.08746	5.64386	7.73471	4.9542
AP3M1	2.80735	5.9542	4	5.12928	4.85798	4.08746	5.39232	4.08746	3.16993	3.45943	3.80735	5	3.90689	0	0	2.80735	3.16993	1.58496	3.70044	3	0	0	0	0	4.90689	3
AP3S1	0	4.39232	2.32193	5.2854	1	2	5	3.58496	0	4.24793	3.45943	3.90689	3.70044	0	0	0	1	0	0	3.32193	0	0	0	2.32193	4.39232	3.58496
AP4E1	0	4.9542	0	0	3.16993	3.16993	0	3.16993	0	0	3.16993	0	0	0	0	0	0	0	4.24793	0	0	0	0	0	1	0
AP4M1	0	0	0	0	4.24793	0	0	2.32193	0	0	0	0	0	0	2	0	0	1.58496	0	0	0	0	0	0	0	0
AP5S1	0	3.90689	1	0	2.80735	0	2.32193	2.32193	0	0	3.16993	0	0	0	0	0	2	0	1	0	0	0	0	2	0	1.58496
AP5Z1	0	5.42626	5.20945	0	3.80735	2.58496	4.16993	2	0	0	0	0	0	0	0	0	0	0	0	0	0	0	0	0	1	0
APBB2	0	0	0	3	2.58496	0	0	0	0	0	0	4.08746	0	0	0	0	0	4.16993	3.16993	0	0	0	1	0	0	0
APEH	4.85798	7.29462	4.32193	7.07682	4.08746	8.36194	5.78136	6.79442	6.12928	3.16993	6.98868	7.15987	5.39232	0	5.45943	4.90689	5.12928	4.75489	0	2.58496	2	0	0	4.16993	6.47573	6.61471
APEX1	5.16993	9.01681	6.49185	8.15987	7.13955	7.13955	8.49586	7.59246	6.04439	7.47573	8.15987	5.72792	5.35755	4	6.22882	6.67243	5.42626	5.20945	5.12928	4	5.80735	7.01123	5.90689	5.88264	7.81378	6.94251
APH1A	0	2.58496	0	0	0	2.58496	2	2.58496	0	0	0	2.32193	2.58496	0	0	0	0	0	0	0	0	0	0	1	0	0
API5	7.39232	9.41363	7.8009	8.29921	9.27612	8.98299	9.92778	9.05257	6.6865	8.32193	8.84235	8.37069	8.15482	0	3.32193	6.6865	6.6865	5.93074	7.64386	7.35755	5.88264	7.55459	6.96578	7.56986	7.96578	8.02237
APIP	3.45943	4.70044	4.24793	4.85798	5.61471	5.16993	5.75489	8.32193	1.58496	1	5.12928	5.04439	7.81378	2.80735	2.80735	0	2.32193	3.16993	0	0	0	0	0	7.74147	4.52356	5.52356
APLP2	0	2.32193	4.24793	5.08746	6.90689	4.75489	6.40939	5.90689	3.45943	0	7.04439	5.55459	5.67243	3.58496	0	2.80735	0	4.45943	2.32193	0	3.16993	0	5.35755	5.2854	0	6.44294
APMAP	9.01959	10.2877	9.34651	8.75154	9.02791	9.00562	9.79442	8.16491	8.73809	8.14466	8.72792	8.06609	8.36194	7.33092	7.73471	6.87036	7.88264	8.51175	9.38586	8.16491	8.02237	7.65821	7.48382	6.52356	8.19476	9.01959
APOA1	6.04439	6.91886	4.85798	0	7.48382	6	7.17991	6.44294	4.64386	3.32193	5.55459	6.88264	6.06609	0	5.04439	5.2854	6.06609	7.9542	7.79442	10.0861	5.83289	6.12928	6.42626	6.22882	5.9542	6.55459
APOA2	0	3.58496	0	0	4.08746	4.16993	3.16993	3.45943	1	0	0	2.58496	2.32193	2.80735	0	1.58496	0	4.58496	3.90689	9.61471	1	4	1	0	3.32193	0
APOA4	0	0	0	0	5.39232	0	0	0	0	0	0	2.58496	0	0	0	0	0	0	0	2.32193	0	0	0	0	0	0
APOBEC1	0	1	0	0	0	0	0	0	0	0	0	0	0	0	0	0	1	1	0	0	0	0	0	0	0	0
APOBEC2	0	0	0	0	3	0	0	0	0	0	0	0	0	0	0	0	0	0	0	0	0	0	0	0	0	0
APOBEC3A	1	3.16993	0	0	1.58496	1	0	0	2	0	0	0	0	0	0	0	0	0	0	0	0	0	2.80735	0	0	0
APOBEC3B	1.58496	2.58496	0	0	4.39232	3.16993	0	0	3.16993	0	3.32193	0	0	0	0	0	0	0	0	0	0	0	3.70044	0	4.58496	0
APOBEC3C	0	3	1.58496	0	0	2.32193	0	1.58496	3.58496	0	1.58496	0	0	0	2	0	0	0	1	0	0	1.58496	1.58496	0	0	0
APOBEC3D	0	0	0	0	1	0	0	0	0	0	1	0	0	0	0	0	0	0	0	0	0	0	0	0	1.58496	0
APOC3	2.32193	3.70044	2	1	4.75489	2.58496	2.58496	3.32193	4.24793	2	0	2.32193	1	1	3	3	0	2	4.58496	2.32193	2.58496	3	2.32193	3	1.58496	2.58496
APOE	6.2854	6.55459	6.40939	3.70044	6.2854	7.02237	7.03342	6.90689	5.20945	3.45943	6.50779	6.45943	7.21917	2.58496	2.32193	6.18982	6.49185	6.20945	7.41785	10.2467	2.32193	5.16993	5.58496	3.80735	5	6.6865
APOH	0	7.12928	5	1	6.6865	5	7.2854	5.83289	0	3.32193	6.22882	5.35755	4.85798	0	0	3.58496	0	2.32193	5.75489	6.52356	0	5.24793	3.16993	3.16993	4.90689	4.75489
APOL2	6.02237	6.06609	4.80735	1.58496	3.80735	4.39232	6.18982	4.52356	5.49185	3.16993	5.20945	0	2.58496	0	1	5.08746	1	5.20945	4.39232	2.80735	5.72792	5.24793	2.32193	2	0	3.32193
APOL4	1	0	2.58496	0	1	1	0	3.45943	0	0	0	2.32193	0	0	0	0	0	0	0	2.58496	0	0	0	0	0	0
APOO	3.58496	5.35755	1.58496	5.24793	5.32193	6.90689	6.04439	5.83289	4.52356	5.32193	5.90689	4.16993	4	0	0	0	3.32193	2.58496	6.33985	3	1	3.45943	0	4.32193	6.16993	6.79442
APOOL	0	4.52356	3	0	4.08746	1.58496	6.30378	4.32193	2	3.58496	2.80735	4.39232	1	0	0	0	0	0	3.90689	1.58496	0	1.58496	0	0	2.80735	3.45943
APP	0	0	0	7.14975	5.08746	4.90689	6.22882	4.64386	1	3.45943	6.58496	5.55459	5.49185	0	1.58496	0	0	0	3.80735	5.20945	0	2.32193	3.16993	0	5.39232	7.42626
APPL1	3.32193	6.06609	4.70044	5.80735	4.64386	6.18982	3	5.85798	4.32193	5	0	4.08746	3.80735	0	2.58496	0	3.80735	4.75489	3.45943	3.32193	0	0	3.70044	5.04439	3.70044	4.32193
APPL2	5	6	1	2.58496	6.55459	6.06609	7.5157	6.49185	5.67243	5.67243	4.16993	4.32193	5	0	0	5.20945	2.58496	4.24793	6.04439	6.91886	6	6.94251	5.39232	4.85798	4.9542	2.80735
APRT	6.76818	8.06609	7.06609	6.06609	7.48382	7.27612	7.85798	7.3837	7.18982	6.58496	7.2854	7.56224	6.44294	0	5.20945	6.22882	6.24793	4.39232	5.85798	6.59991	5.20945	5.9542	4.75489	4.75489	8.15987	7.01123
AQP6	0	0	0	0	1	0	0	0	0	0	0	0	0	0	0	0	0	0	0	0	0	0	0	0	0	1
AQR	1.58496	5.04439	4.70044	4.90689	5.64386	6.75489	5.93074	6.44294	5.08746	0	4.85798	4.24793	0	0	0	0	0	0	3.32193	0	0	3.80735	0	3.70044	5.39232	3.90689
ARAP1	0	7.59246	4.80735	0	1	4.52356	0	0	3.58496	0	0	0	0	4.85798	3	5.12928	3.70044	0	0	0	0	0	1.58496	0	0	0
ARCN1	6.50779	7.63662	5.52356	8.17493	6.52356	8.64386	7.85798	7.62205	8.18982	4.39232	7.20945	7.54689	7.74819	4	5.32193	5.32193	5.42626	5.97728	6.64386	3.70044	6	5.61471	5.24793	5.52356	7.65105	6.97728
AREL1	0	0	0	0	0	0	0	0	0	0	0	0	0	0	0	0	0	0	0	0	0	0	0	0	0	0
ARF1	7.26679	7.74147	7.40939	7.70044	7.59991	7.6865	7.75489	6.9542	6.87036	7.09803	7.18982	6.78136	6.72792	3	5.16993	6.59991	6.74147	6.26679	6.44294	7.55459	6.42626	6.42626	6	6.14975	7.85798	7.53138
ARF3	7.33985	8.66178	8.17991	8.18488	8.3443	7.82018	8.45943	7.47573	7.09803	7.35755	7.93074	7.40088	6.79442	2	5.42626	6.70044	7.14975	6.59991	6.96578	8.15987	6.42626	6.6865	6	6.26679	8.68299	8.12928
ARF4	7.42626	8.22882	7.27612	7.62205	7.70044	9.29692	8.75154	8.18488	8.59991	7.16993	8.41785	7.15987	7.43463	5	4.16993	6.71425	6.97728	6.14975	7.11894	7.93664	7.62936	7.49985	6.18982	6.52356	8.88874	7.93664
ARF5	6.47573	7.85175	7.12928	7.47573	6.90689	8.224	7.84549	7.26679	6.39232	7.15987	7.5157	7.06609	6.83289	3.16993	3.90689	6.26679	6.94251	6.04439	6.30378	7.41785	5.75489	6.71425	5.67243	5	8.27612	7.62205
ARF6	4.16993	5.75489	4	5.75489	4.39232	5.2854	5.52356	5.24793	4.16993	4.24793	5.2854	5.45943	4.16993	0	3.80735	3.58496	4.52356	4.24793	4	4.32193	3.45943	2.58496	3.16993	3.70044	4.85798	5.85798
ARFGAP1	4.58496	6.26679	0	6.06609	6.45943	5	6	6.2854	2	2	6.74147	5.67243	5.32193	0	2.32193	0	3	0	0	0	4.24793	6.02237	4.70044	0	5.93074	5.39232
ARFGAP2	4.24793	7.74147	4.80735	5.55459	2.80735	6.37504	6.85798	6.78136	4.52356	5.42626	7.04439	6.14975	5.04439	0	5.12928	4.64386	4.90689	5.20945	4.64386	0	0	2	1.58496	0	6.06609	6.30378
ARFGEF1	6.12928	8.29462	5.9542	0	5.9542	7.56224	7.25739	6.2854	6.16993	4.75489	5.16993	0	0	3.58496	0	5.72792	0	5.2854	4.90689	0	5.83289	0	5.12928	6.02237	6.37504	3.70044
ARFGEF2	5.2854	6.18982	3.58496	0	6.45943	6.33985	5.70044	0	1.58496	3.80735	0	0	0	0	0	0	0	0	3.16993	0	4.32193	0	0	0	4.45943	0
ARFIP1	6.83289	7.04439	6.35755	7.62205	7.07682	7.2854	7.76155	6.10852	5.24793	6.71425	6.82018	6.53916	7.24793	0	2	5.32193	5.04439	4.85798	6.08746	6.35755	4.90689	6.02237	4.32193	4.70044	6.40939	6.35755
ARFRP1	0	0	0	0	1.58496	0	0	0	0	0	0	0	0	0	0	0	0	0	0	0	0	0	0	0	0	1
ARG1	0	2	0	2.32193	2.32193	1.58496	3.16993	2.32193	0	2.80735	0	2.58496	0	5.12928	2	0	0	0	0	0	0	0	0	0	2	0
ARHGAP1	2	8.54689	7.13955	7.43463	5.83289	7.84549	6.61471	7.7211	6.30378	6.49185	6.79442	5.97728	5.70044	0	4.58496	5.12928	6.71425	6.02237	7.2854	7.32193	4.80735	6.53916	4.58496	4.32193	7.29462	7
ARHGAP17	4.75489	6.44294	5.83289	4.80735	4.32193	5.45943	5.97728	4.39232	2.32193	3	1.58496	0	0	0	2	4.39232	4.52356	2.32193	0	0	5.20945	0	1	0	0	2.32193
ARHGAP18	0	6.02237	3	2.58496	2.80735	4.16993	5.20945	5.85798	4.32193	0	3.45943	3.32193	5.08746	0	2	0	2.32193	3.16993	0	0	0	0	0	0	4	3.90689
ARHGAP26	1	3.16993	0	0	1.58496	4.85798	0	4	0	0	0	0	0	0	0	0	0	0	1	0	2.32193	0	0	1.58496	2.32193	3.32193
ARHGAP27	0	6.90689	2.32193	2	5	3.58496	3	0	1	0	0	0	1.58496	0	0	5.64386	0	5.08746	0	3.90689	0	2.58496	0	0	1.58496	0
ARHGAP28	0	0	2.32193	0	5.24793	4.52356	4.32193	0	2.58496	3.80735	0	0	3.90689	0	0	0	0	2	0	0	3.32193	3.70044	0	0	0	2.32193
ARHGAP45	0	7.44294	4.70044	0	1	3	0	2.58496	3.80735	0	0	0	0	0	4.75489	2.58496	2	0	0	0	0	0	0	0	3.32193	0
ARHGAP8	2	1	0	1	0	0	0	0	0	0	1	0	0	0	0	1.58496	0	0	1.58496	0	0	0	0	0	0	0
ARHGDIA	6.72792	8.27146	7.27612	6.80735	6.9542	7.63662	7.88874	7.34873	5	6.55459	7.57743	7.22882	6.90689	3.90689	5.90689	6.83289	6.08746	4.75489	4.9542	5.80735	4.70044	5.61471	3.80735	5.61471	6.58496	6.59991
ARHGDIB	6.2854	9.55267	8.25267	6.53916	3.80735	6.53916	6.12928	6.91886	5.49185	6.20945	6.55459	7.03342	7.06609	6.10852	8.19967	8.63662	6.98868	8.07146	5.70044	4.58496	3.32193	5.9542	6.96578	0	7.33092	7.78136
ARHGEF1	7.53916	9.0607	7.13955	0	5.12928	7.73471	7.36632	7.40088	6.75489	0	5.9542	6.83289	0	4.85798	7.33092	7.21917	6.33985	6.39232	3.45943	0	5.12928	3.45943	6.24793	3.32193	6.47573	5.42626
ARHGEF2	6.32193	8.06609	5.78136	3.58496	3.16993	6.2854	4	5.90689	5.49185	5.04439	3.45943	1	2.80735	3.32193	4.24793	6.52356	5.58496	6.85798	0	2.32193	1.58496	5.04439	6.6865	0	4.45943	5.08746
ARID1A	4.39232	8.69349	7.11894	7.07682	8.94251	6.64386	8.49985	7.65821	1.58496	6.72792	7.37504	7.47573	0	0	0	4.9542	0	0	3.90689	0	0	4.80735	6.65821	5.04439	6.83289	5.52356
ARID1B	0	5.35755	3	4.24793	4.39232	6.08746	6.24793	7.49985	0	5.64386	0	0	5.90689	0	1.58496	0	0	0	0	0	0	0	0	0	2.80735	3.45943
ARID2	0	3.70044	0	0	3.45943	0	6.79442	4.75489	0	0	2.80735	0	0	0	0	0	0	0	0	0	0	0	0	0	0	0
ARID3A	0	0	0	0	1.58496	0	3.32193	0	0	1.58496	0	0	0	4.39232	0	0	0	0	0	0	0	0	3.16993	0	2.80735	0
ARL1	5.35755	7.08746	5.52356	5.16993	7.42626	6.45943	8.31741	5.90689	5.39232	5.83289	6.04439	4.90689	5.08746	1	3.16993	4.08746	5.12928	4.45943	6	6.16993	5.97728	4.58496	5.39232	5.72792	6.70044	5.83289
ARL6IP1	3	4.64386	5.90689	5.42626	4.39232	6.39232	5.08746	6.22882	5.52356	5.55459	5	5.2854	5.55459	1	0	1.58496	2.32193	0	4.16993	4.90689	3	0	1	1.58496	5.78136	4.52356
ARL6IP5	4.70044	6.65821	5.9542	4.64386	5.67243	6.40939	5.52356	6.16993	6.08746	5.80735	4.70044	4.85798	4.9542	4.08746	5.08746	5.12928	5	5.72792	6.12928	5.45943	4.24793	4.9542	3.90689	5.9542	5.49185	5.2854
ARL8A	3.45943	7.60733	6.58496	5.49185	7	6.26679	6.67243	6.74147	4.08746	5.24793	6.02237	4.64386	4.58496	5.32193	4.16993	5.64386	5.35755	5.52356	6.96578	5.64386	3.32193	3.16993	5.45943	4.58496	6.04439	5.39232
ARL8B	5.85798	7.9542	7.21917	5.72792	7.56986	6.61471	7.3837	6.58496	4.75489	6.02237	6.22882	5.75489	5.55459	5.80735	4.85798	5.83289	5.61471	6.12928	7.03342	5.70044	4.85798	5.35755	5.16993	4.9542	6.08746	5.32193
ARMC1	0	5	3.32193	2.80735	2.32193	4.39232	5.04439	4.08746	1.58496	0	0	1	2.32193	0	1.58496	0	0	0	3.90689	0	4.24793	0	2.58496	2.32193	3.45943	4.80735
ARMC10	4	5.42626	4.32193	4.16993	4.80735	7.16993	6.22882	6.76818	5.24793	4.24793	6.56986	5.83289	5.9542	0	0	0	3	2.80735	4.24793	4	3.16993	0	2	5.9542	5.80735	5.45943
ARMC7	0	0	0	0	1	0	1	0	0	0	0	0	0	0	0	1.58496	0	0	0	0	0	0	0	0	0	0
ARMC8	0	7.88874	4.52356	6.59991	6.9542	5.39232	6.82018	6.30378	1	0	2	3.58496	0	0	1.58496	0	3.58496	3.45943	5.90689	4.90689	0	0	1	5.20945	3.90689	0
ARMCX2	1	2	0	0	3	0	0	0	0	0	0	0	0	0	0	0	0	3.32193	1	0	0	3.90689	0	0	0	0
ARMCX3	3.45943	4.70044	3.58496	4.16993	2.80735	5.42626	4.64386	4.32193	3.80735	0	0	4.39232	3.32193	0	1.58496	3.16993	2.32193	3.58496	4.24793	0	4.39232	3.80735	3	0	3.16993	4.39232
ARMT1	4	5.97728	4.90689	4.16993	2	5.12928	5.55459	4	4.45943	3.45943	4.75489	2.80735	2.58496	0	0	2.58496	4.24793	0	2.80735	3	0	3.16993	1.58496	3.90689	5.80735	4.52356
ARNT	0	0	0	0	0	0	0	0	0	0	0	1.58496	0	0	0	0	0	0	0	0	0	0	0	0	0	0
ARPC1B	4.39232	8.92778	7.70736	4.52356	6.45943	7.29462	7.39232	7.61471	6.20945	6.49185	7.06609	7	6.75489	5.32193	6	6.84549	6.22882	6.72792	5.16993	2.80735	5.2854	5.08746	5.61471	4.24793	7.24793	6.04439
ARPC2	6.71425	9.46148	7.74819	5.78136	6.35755	7.73471	7.47573	7.61471	7.79442	6.44294	7.29462	6.16993	6.14975	6.98868	7.59246	7.56986	7.5157	7.73471	6.33985	1.58496	6.18982	5.67243	6.22882	4.80735	7.20945	7.27612
ARPC3	3	8.07682	6.08746	6.32193	5.9542	6.42626	6.96578	6.97728	5.42626	6.02237	5.64386	6.65821	6.65821	3.45943	6.47573	5.20945	4.85798	5.97728	3.58496	3.58496	3.58496	3.58496	4.75489	3.70044	6.06609	6.14975
ARPC4	7.06609	8.60363	7.81378	7.47573	7.43463	7.73471	7.37504	7.20945	7.42626	7.12928	7.60733	6.90689	7.02237	5.90689	6.83289	7.14975	7.21917	7.30378	6.30378	6.72792	6.2854	5.24793	6.58496	5.85798	6.96578	6.89482
ARPC4-TTLL3	4.52356	6.84549	5.80735	5.64386	5.24793	6.18982	5.12928	5.61471	5.80735	4.32193	5.9542	5.52356	5.58496	2.80735	4.64386	5.08746	5.35755	5.45943	3.70044	5.08746	3.90689	4.24793	4.24793	4.58496	5.42626	4.9542
ARPC5	4.24793	6.83289	6.24793	4.85798	5.16993	4.75489	5.52356	5.58496	4.16993	4.9542	4.39232	4.24793	5.24793	5.64386	5	4.08746	5.12928	3	2.58496	1.58496	1.58496	0	3.16993	2	4.58496	5
ARPC5L	1.58496	3.16993	2.80735	3.90689	3.58496	4.32193	4	4.16993	2.32193	2.32193	3	4.24793	3.32193	2.80735	3	0	2.80735	1.58496	0	0	1.58496	0	2	2	2.58496	3.32193
ARPIN	0	1	0	5.49185	1.58496	1.58496	4.9542	4.80735	0	4	4.52356	4.45943	2	0	0	0	0	0	3.80735	0	0	2.80735	0	0	3.58496	1.58496
ARPP19	0	3.16993	2.32193	0	1	1	4.08746	0	0	0	0	2	0	0	0	2.58496	0	0	0	0	0	0	0	0	0	0
ARRB1	0	8.45943	6.40939	4.64386	3.32193	5.12928	6.2854	6.39232	4.9542	3	6.71425	4.52356	0	0	0	5.08746	3.32193	3.16993	0	4.85798	2.80735	1.58496	0	0	5.55459	6.08746
ARRDC2	0	0	0	0	1	0	0	0	0	0	0	0	0	0	0	0	0	0	0	0	0	0	0	0	2.32193	0
ARSG	0	0	0	0	0	0	0	0	0	0	0	0	0	0	0	0	0	0	0	0	0	0	0	0	0	0
ART1	0	1.58496	0	0	1.58496	0	0	0	0	0	0	0	0	0	0	0	0	0	0	0	0	0	0	0	0	0
ART5	0	1.58496	0	0	1.58496	0	0	0	0	0	0	0	0	0	0	0	0	0	0	0	0	0	2.32193	0	0	0
ARTN	2	1	0	0	1	0	0	0	0	0	0	0	0	0	0	0	0	2	0	0	1	0	0	0	0	0
ASAH1	8.6865	10.0954	8.05528	7.62205	9.04985	9.08746	9.03617	8.77479	8.30834	6.64386	9.83447	5.35755	9.01402	8.71425	4.85798	8.10329	8.43463	8.41363	7.81378	9.37721	9.10591	6.97728	7.44294	6.9542	7.5157	8.38802
ASAH2	0	0	3	0	3.45943	1	0	0	0	0	0	0	0	0	0	0	0	2.80735	0	0	0	0	0	0	0	0
ASAH2B	0	0	0	0	1	0	0	0	0	0	0	0	0	0	0	0	0	1.58496	0	0	0	0	0	0	0	0
ASAP1	0	4.90689	0	2.58496	5.24793	0	0	0	0	3.70044	0	0	0	0	0	0	2	0	2.58496	0	0	0	0	0	3.80735	0
ASAP3	0	0	0	4.08746	3.58496	2.58496	3.16993	0	1.58496	0	3.16993	1	0	1	0	0	0	3.16993	0	0	0	0	0	0	1	0
ASB2	0	0	0	0	3	0	2.32193	0	0	0	0	0	0	0	0	0	0	0	0	0	0	0	0	0	0	1
ASB8	2.32193	0	0	0	0	0	0	0	0	1.58496	0	0	0	0	0	0	0	0	0	1	0	0	0	0	0	0
ASCC2	0	5.61471	3.90689	4.32193	6.22882	4.9542	5.58496	4.32193	3	3	0	2	0	0	1	1.58496	0	0	0	1	0	3.16993	1.58496	0	5.32193	1.58496
ASCC3	4.52356	6.16993	0	0	5.24793	6.26679	0	0	4.16993	3.58496	0	0	0	0	0	0	0	0	0	0	0	0	3.70044	0	5.12928	0
ASIC4	0	0	0	0	3.70044	0	0	0	0	0	0	0	0	0	0	0	0	0	0	0	0	2	0	0	0	0
ASL	7.82655	7.03342	4.80735	7.81378	7.79442	8.75154	8.04985	5.2854	7.84549	7.22882	8.68299	8.59246	5.04439	0	0	4.08746	2.58496	4.58496	4.90689	7.74147	6.88264	5.32193	2.32193	0	6.61471	5.70044
ASMT	0	0	0	2	1.58496	0	1	0	1	0	0	0	0	0	0	0	0	0	0	0	0	0	0	0	2.58496	0
ASNA1	4.75489	7.45121	5.70044	6.90689	5.42626	6.98868	6.94251	6.49185	5.90689	6.37504	5.70044	4.90689	5.08746	0	3.70044	3.90689	5.72792	4.75489	5.75489	4.75489	0	3.16993	3.90689	4.52356	6.94251	6.37504
ASNSD1	0	0	1.58496	2.58496	3.32193	0	4.52356	0	0	3.45943	4.64386	4.24793	1.58496	0	0	0	2.58496	0	0	1	0	0	0	0	3.58496	1
ASPDH	0	0	0	0	2.32193	0	0	0	0	1	0	0	0	0	1	0	0	1.58496	0	0	1.58496	0	0	0	0	0
ASPH	6.18982	5.52356	5.72792	5.78136	8.50779	6.16993	8.96578	7.79442	5.12928	7.49985	8.25739	7.90689	9.10852	3	3.16993	2.32193	3.32193	5.58496	7.21917	7.61471	8.08746	8.24793	4.16993	0	7.20945	6.22882
ASPHD1	1	0	0	2.58496	0	3.45943	0	0	2	0	0	3.70044	3	0	0	0	0	0	2	0	0	0	0	0	0	1
ASPSCR1	2.32193	6.02237	4.24793	0	0	2	3.90689	5.24793	2.32193	0	0	5.39232	0	2.80735	0	0	0	0	0	0	0	0	0	0	4	3.80735
ASRGL1	0	3.16993	2.58496	3.32193	0	2.58496	0	5.97728	1	0	4.52356	0	0	0	0	0	0	0	0	0	0	0	0	0	3.80735	0
ASS1	0	0	0	2.80735	3.32193	5.70044	4.08746	6.35755	5.67243	0	5.85798	0	0	0	0	0	0	0	5.85798	1.58496	1.58496	2.32193	0	0	0	6.88264
ASTN2	0	2	0	0	1	0	0	0	1	0	0	0	0	0	0	0	0	0	0	0	0	0	0	0	0	0
ASUN	0	2.58496	0	0	5.67243	4.32193	4.32193	5.32193	3	0	0	4.70044	0	0	0	0	0	0	0	0	0	0	0	0	3	0
ATAD1	0	3.32193	0	3.16993	3	2	2.80735	5.55459	3.32193	3.80735	5.16993	2	4.45943	0	0	0	0	0	2.58496	0	0	3.16993	0	0	0	5.58496
ATAD2	0	0	0	2.80735	4	0	0	4.9542	0	0	0	4.80735	0	0	0	0	0	0	0	0	0	0	0	0	3	1
ATAD3A	5.61471	6.49185	5.93074	8.03342	8.81698	8.93664	7.99435	8.2854	7.93664	6.87036	8.77479	8.98584	6.94251	0	3	5.16993	4	5	6.49185	3.58496	6	5.24793	5.93074	7.40088	8.45943	8.49586
ATAD3B	4.08746	5.35755	4.39232	5.90689	7.2384	7.29462	6.62936	6.67243	6.62936	4.58496	6.6865	7.27612	5.35755	0	0	4.24793	2.80735	2.58496	4.70044	0	5	4.16993	5.04439	6.80735	6.02237	6.45943
ATAD3C	3.16993	2.80735	2.32193	4.70044	5.75489	5.9542	4.58496	5.20945	5.04439	3.90689	5.67243	5.32193	4	0	1.58496	1.58496	1	0	3.45943	2.58496	0	0	1	2.32193	5.08746	4.90689
ATF1	0	1.58496	0	0	0	1	3	2	0	0	3.70044	3.32193	0	0	0	0	0	0	0	1	0	0	0	1.58496	0	2.32193
ATF7	0	3.70044	1	2.58496	3.45943	1.58496	2.58496	5.16993	0	4	3.80735	0	1.58496	0	0	0	0	0	0	0	0	3.80735	1	0	1.58496	0
ATG3	3.58496	7.49185	5.08746	5.42626	3.90689	5.70044	5.90689	4.90689	4.39232	5.61471	4.64386	4.9542	1.58496	3.80735	4.16993	5.20945	5.16993	4.85798	2.58496	2.58496	1.58496	2.80735	1	3.45943	5.70044	4.90689
ATG4B	0	4.08746	0	1.58496	3	2	5.24793	0	3.58496	0	0	0	0	0	2.32193	3	0	0	1.58496	0	2	0	0	0	5.49185	0
ATG5	0	3.90689	0	2.32193	2	3.32193	4.75489	2.80735	0	2.80735	1.58496	3.45943	3	0	0	0	1.58496	0	0	0	0	0	0	3.16993	3.80735	0
ATG7	3.90689	7.80735	5.97728	6.47573	4.58496	5.24793	6.02237	5.70044	3.16993	4.39232	2	0	0	3.70044	2.80735	5.20945	6.2854	3.90689	0	1	2.32193	0	4.58496	3.45943	6.37504	3.58496
ATG9A	1.58496	5.2854	3.45943	0	2.58496	5.35755	5.2854	5.70044	4	4.32193	3	3.32193	0	0	0	1.58496	1.58496	0	0	0	3.16993	2.32193	0	0	4.75489	5.08746
ATIC	6.49185	8.47573	6.85798	7.89482	10.0168	9.44294	9.60363	8.54303	8.79116	8.29462	8.32193	8.78463	8.45943	3.45943	7.03342	6.72792	6.59991	4.9542	4.24793	5.61471	6.18982	7.24793	5.35755	7.43463	8.43879	8.96578
ATL1	0	2.32193	0	4.52356	3	0	0	3.16993	1.58496	0	0	0	2.32193	0	0	0	0	0	2.80735	1.58496	0	0	0	0	0	3.32193
ATL2	4.45943	4.90689	3.80735	5.49185	5.78136	7.2384	5.55459	7.87036	5.55459	5	7.12928	7.36632	5.83289	0	2	1	3.16993	0	7.16993	5.45943	3.58496	0	2.58496	3	6.58496	5.85798
ATL3	6.30378	8.56224	8.56224	7.86419	6.83289	8.52356	7.62936	8.19967	7.97154	6.74147	8.11894	7.15987	6.9542	6.42626	3.58496	6.42626	7.48382	7.17991	7.69349	6.65821	6.70044	6.79442	5.42626	6.79442	8.41363	7.85175
ATOX1	0	3.90689	2	3	1.58496	3	2.58496	2.32193	0	3	2.32193	2	1.58496	0	0	2	1	0	0	3.16993	0	2.32193	0	0	2	3
ATP11B	1	0	0	0	2	4.75489	4.16993	0	4.90689	0	0	0	0	1.58496	0	0	1	0	0	0	0	0	2.58496	0	2.58496	0
ATP12A	3.32193	3.70044	0	3.32193	4.24793	6.30378	4.90689	4.08746	3.58496	5.04439	5.04439	3.32193	3.16993	0	0	0	0	0	2.32193	3.90689	0	5.04439	0	3.58496	5.16993	4.32193
ATP13A1	2.32193	8.01123	8.17493	7.19967	7.01123	7.55459	8.33985	7.10852	7.72792	6.93074	7	7.25739	7.12928	0	0	4.52356	6.02237	4.75489	4.9542	6.56986	5.2854	0	5.16993	2	7.33985	6
ATP1A1	8.56224	8.25267	8.33539	8.62936	8.98299	10.6777	9.7364	8.86728	9.47978	8.53528	9.3966	8.55459	8.88264	4.45943	6.20945	6.64386	6.75489	7.2384	9.54882	8.93369	8.25267	8.2384	8.26209	8.06609	8.98584	8.16993
ATP1A2	6.79442	6.62936	6.70044	6.56986	7.91289	9.34207	7.92481	7.70044	7.46761	7.42626	7.74147	7.10852	7.43463	2.32193	3	5.16993	2.58496	5.88264	7.24793	6.97728	6.67243	6.24793	6.53916	6.30378	7.7879	6.44294
ATP1A3	7.56986	7.2854	6.94251	6.67243	8.0607	8.75154	7.73471	7.43463	7.17991	7.80735	7.19967	6.61471	6.75489	4.16993	4.80735	5.35755	4.08746	6.59991	7.54689	7.05528	7.16993	6.74147	6.65821	6.72792	7.07682	6.32193
ATP1A4	4.39232	5.24793	5.32193	4.80735	5.61471	6.91886	5.97728	5.61471	6.08746	5.52356	5.83289	5.16993	5.42626	3.16993	2.32193	3	2.32193	3	5.85798	4.9542	3	3.90689	3.80735	4.24793	6.12928	5.45943
ATP1B1	7.76818	6.04439	6.59991	5.42626	8.53528	8.36194	9.11894	7.32193	7.10852	7.77479	8.19476	6.80735	7.03342	1.58496	0	5.04439	2.58496	4	6.82018	7.43463	6.6865	6.71425	6.32193	1	7.73471	7.5157
ATP1B3	4	5.85798	6.44294	5.90689	5.12928	5.67243	6.62936	5.2854	4.52356	4.58496	3.90689	5.45943	4.52356	2.58496	0	3.90689	4.24793	3.70044	4.80735	3.80735	2	0	3.16993	1.58496	5.67243	5.61471
ATP2A1	5.52356	7.55459	7.34873	7.10852	6.22882	8.53916	7.74147	7.59991	7.35755	6.94251	7.34873	6.58496	7.01123	4	2	5.24793	6.04439	5.83289	7.27612	6.04439	5.80735	6.32193	5.61471	7.11894	7.43463	6.14975
ATP2A2	8.28077	9.59805	9.44087	8.98584	9.03892	10.3848	9.59246	9.79766	9.82655	9.34207	9.91289	8.86109	9.02237	5.20945	3.58496	7.26679	7.91886	8.24317	9.42836	8.17991	8.47168	8.55459	7.62205	8.96867	9.48784	7.61471
ATP2A3	4.45943	7.11894	6.08746	7.7879	6.08746	7.43463	5.49185	7.42626	7.10852	6.55459	6.82018	4.80735	5.55459	5.12928	5.61471	4	4.80735	5.24793	5.9542	5.64386	4	5.45943	4.80735	3.70044	5.72792	4.58496
ATP2B1	4.32193	7.52356	6.62936	6.93074	7.07682	8.40939	8.42626	7.29462	5.88264	6.47573	7.14975	6.67243	7.48382	0	2.80735	5	6.08746	5.32193	6.6865	6.45943	5.55459	5.49185	6.40939	0	7.46761	6.65821
ATP2B2	2	3.80735	3.90689	4.70044	5.52356	5.72792	5.85798	6.06609	2.80735	3.45943	5.85798	4.58496	5.78136	0	0	0	1.58496	2.80735	4.58496	3.80735	0	0	3	0	4.75489	5.55459
ATP2B3	0	4.08746	4.24793	3.80735	4.58496	5.32193	5.45943	4.75489	2.80735	4.08746	5.32193	5.04439	5	0	0	0	2	2.80735	3.58496	3.70044	0	0	5.42626	0	4.24793	3
ATP2B4	4.52356	7.43463	7.36632	7.13955	7.36632	8.09803	6.55459	6.45943	5.32193	5.2854	6.24793	7.63662	6.89482	0	5.70044	4.90689	5.35755	3.16993	8.76487	6.12928	0	1.58496	2.58496	0	7.52356	5.9542
ATP2C1	0	4.9542	5.2854	6.35755	6.14975	7.22882	7.01123	7.58496	7.01123	6.45943	6.22882	4.45943	6.32193	0	0	0	3	0	7.33985	5.16993	0	0	2.80735	0	7.05528	4.32193
ATP4A	5.12928	4.45943	4.64386	3.32193	5.32193	5.45943	5.35755	3.90689	4.58496	3.90689	4.64386	4.16993	4.08746	0	1.58496	2.32193	0	4	4.52356	5.04439	4.32193	5.20945	4.90689	5.58496	4.58496	3.45943
ATP5A1	9.72622	10.9915	10.6724	10.633	11.0627	11.2715	10.9054	10.933	10.7887	10.7022	11.1674	11.0492	10.8218	7.70736	9.45327	9.71768	9.33762	9.69174	10.4798	9.66888	8.91588	9.35755	9.08215	8.92778	10.5048	11.007
ATP5B	11.0888	11.163	10.5699	10.102	11.1039	11.1013	10.7903	10.0512	10.5708	10.7985	10.8849	10.1662	10.2842	7.11894	10.3231	9.85798	10.102	10.3038	11.0007	10.2819	9.99294	9.60733	10.0593	10.2396	10.4502	10.8704
ATP5C1	4.24793	7.45943	5.39232	5.78136	6.6865	6.74147	7.2384	6.93074	7.49985	4.52356	6.84549	5.32193	6.50779	0	3.70044	5.16993	5.08746	4.85798	6.50779	4.16993	4.80735	4.64386	4.24793	4.64386	5.88264	6.24793
ATP5D	2.32193	4.58496	3.80735	3.45943	4	5.49185	3.70044	3.70044	4.9542	3.80735	4	4.08746	3.32193	1	3.45943	3.58496	4.24793	4.45943	4.52356	3.16993	3	3.70044	4.08746	3.80735	4.08746	4.39232
ATP5F1	5.12928	8.13955	7.14975	6.61471	8.04985	7.22882	7.71425	6.84549	6.26679	6.96578	7.14975	6.97728	6.80735	1.58496	0	5.88264	5.24793	6.10852	6.78136	7.13955	5.12928	5.61471	5.64386	6.49185	6.33985	6.53916
ATP5H	5.93074	7.22882	6.20945	5.08746	6.78136	6.82018	6.39232	6.49185	6.33985	7.19967	7.06609	5.45943	6.22882	3.80735	6.2854	6.20945	5.61471	6.58496	7.10852	4.58496	5.64386	5.24793	5.75489	5.72792	6.06609	6.49185
ATP5I	0	2.32193	2.32193	2	1.58496	3.58496	3	3.16993	2	2.58496	3.70044	3.32193	2.58496	0	0	0	0	0	2.80735	3.45943	0	0	1.58496	0	2.80735	3.80735
ATP5J	4.08746	4.64386	2.32193	3.58496	5.2854	4.9542	5.16993	4.16993	4.16993	6.35755	4.85798	3.58496	4	3.32193	3.58496	4.90689	3	4.85798	5	5.20945	3.58496	4.75489	4.32193	0	3.45943	5.70044
ATP5J2	4.52356	5.20945	4.70044	3.58496	4.85798	5.52356	4.64386	4.80735	4.90689	4.39232	4.70044	4	4.16993	0	3.16993	2.32193	4.39232	4.32193	3.70044	1.58496	3.80735	2.80735	4	4.08746	3.90689	4.90689
ATP5J2-PTCD1	5.72792	5.35755	2.32193	2.80735	6.16993	5.12928	5.35755	4.9542	4.32193	4.39232	3.16993	3.32193	5.42626	3.16993	2.32193	0	2.80735	4.32193	4.16993	0	4.85798	3.32193	0	5.08746	0	5.12928
ATP5L	5.2854	5.9542	5.04439	4.75489	5.83289	5.70044	4.64386	3.70044	4.32193	4.80735	5.9542	5.35755	4.64386	0	3.32193	3.16993	3.16993	4.52356	5	5.67243	1	2.80735	2.80735	3.70044	5	5.55459
ATP5O	2.80735	6.04439	5.97728	5.39232	6.40939	6.83289	5.49185	4.64386	5.85798	5.12928	5.08746	4.85798	6.14975	0	4.9542	4.85798	4.58496	4	6.02237	3.70044	1	4.58496	4	4.16993	5.39232	5
ATP6AP1	2.32193	7.07682	5.45943	4.9542	6.76818	7.14975	8.31288	7.05528	4.45943	4.24793	6.83289	2.32193	0	0	0	2.80735	3.16993	2.80735	0	1.58496	0	1.58496	0	4.24793	7.03342	6.47573
ATP6AP2	3.80735	5.2854	7.84549	8.02791	6.56986	7.58496	8.66178	8.47168	4.08746	5.52356	6.26679	6.2854	5.85798	0	0	0	5.04439	3.58496	5.97728	6.24793	0	0	0	4.70044	6.91886	6.42626
ATP6V0A1	5.93074	8	7.62936	5.70044	6.24793	7.45121	6.70044	7.87652	8.44294	7.58496	7.56224	6.02237	6.06609	1.58496	3.16993	2	6.96578	3.70044	6.89482	6.16993	4.85798	0	4.9542	4.52356	7.40939	6.75489
ATP6V0D1	5.04439	8.37938	6.96578	6.89482	6.76818	6.45943	7.62205	8.33092	5.78136	5.35755	7.78136	4.64386	5.9542	4.39232	3.58496	5.58496	7.09803	6.45943	6.62936	5.20945	4.85798	4.24793	4	4.64386	7.31288	6.76818
ATP6V0D2	0	2.32193	1	2	2	0	0	1	0	1	0	0	0	0	0	0	0	0	0	0	1.58496	0	2.32193	3	2.32193	0
ATP6V1A	6.04439	9.4818	9.19722	7.29462	8.31288	8.04985	8.50779	8.53528	8.04439	7.90087	7.33985	7.82018	7.60733	4.58496	6.06609	7.99435	7.88264	8.09803	8.45943	7.36632	5.20945	6	4.45943	5.72792	8.04985	7.74147
ATP6V1B1	4.39232	6.97728	6.83289	0	6.72792	6.2854	4.58496	6.59991	5.49185	5.88264	6.02237	5.75489	6	0	4.32193	4.58496	6.22882	5.78136	4.39232	3.80735	0	1.58496	2	5.08746	5.35755	4.45943
ATP6V1B2	6.40939	8.37938	7.59246	5.35755	7.57743	6.74147	6.76818	7.64386	6.35755	6.20945	6.26679	6.82018	7.29462	4.9542	5.90689	6.24793	6.75489	7.11894	6.2854	5.58496	4.52356	5.12928	3.90689	4.45943	7.12928	6.26679
ATP6V1C1	1	7.7211	6.24793	5.70044	6.74147	5.24793	7.2384	6.10852	4.16993	4.70044	5.35755	4.70044	5.39232	2.80735	0	5.45943	5.04439	5.20945	5.12928	4.08746	3.90689	4.32193	4	5.12928	6.42626	5.16993
ATP6V1D	0	6	4.32193	2.32193	4.85798	3.90689	5	4.90689	0	4	3.80735	3.58496	3.58496	0	2.80735	0	1.58496	0	3	4.9542	0	0	0	3.58496	4.39232	3.45943
ATP6V1E1	2	4.52356	5.67243	0	3.32193	5	4.39232	6	4.58496	4.90689	3.80735	2.32193	4.52356	3.70044	1	5.80735	3.58496	5.72792	1.58496	0	4.32193	3.70044	2.80735	0	2	4.08746
ATP6V1F	3	6.53916	4.08746	4.70044	3.90689	4	4	4.64386	4.24793	2.32193	3.58496	2.80735	0	2.80735	2.32193	4.39232	3.80735	5.2854	4.70044	2.58496	2.58496	3.45943	2	4.24793	3.80735	3.45943
ATP6V1G1	3.45943	5.12928	5.12928	2.80735	5.08746	3.70044	4.85798	4.45943	3.80735	5.12928	3.80735	3.90689	3.45943	0	3	4.32193	1.58496	3.80735	4.24793	3.16993	0	2.58496	2.32193	1.58496	4	2
ATP6V1G2	1	0	0	0	0	0	0	0	0	0	0	0	0	0	0	0	0	0	1	0	0	0	0	0	0	0
ATP6V1H	3.58496	7.08746	6.50779	5.04439	5.90689	5.55459	5.75489	6.6865	4.58496	5.67243	6.02237	4.58496	5.58496	3.80735	0	5.42626	5.32193	5.90689	4.70044	5.2854	0	3.70044	0	0	6.10852	4.75489
ATP7A	0	2.58496	0	0	4.39232	0	3.58496	0	0	1.58496	0	0	0	0	0	0	0	0	0	0	0	0	0	0	0	0
ATPAF1	0	0	0	0	2.32193	0	0	4.32193	0	0	0	1	1	0	0	0	0	0	0	0	0	0	0	0	0	0
ATPAF2	2.58496	3.70044	2.58496	2.58496	4.45943	4.85798	5.42626	3.80735	0	4.9542	4.24793	4.08746	1.58496	0	0	0	0	1	4.9542	4	0	0	0	0	4.58496	4.08746
ATPIF1	3.16993	1.58496	0	0	3	0	2.58496	0	4.32193	0	0	0	0	0	0	0	0	0	0	0	0	0	0	0	0	0
ATXN10	6.08746	7.24793	4.9542	6.47573	6.12928	6.78136	7.3837	5.67243	3.80735	5	2.32193	5.64386	4.64386	0	0	3.58496	2.32193	2.80735	4	3.70044	4.08746	3	4.32193	0	6.59991	4.90689
ATXN2L	0	6.94251	6.49185	6.91886	7.17991	6.02237	8.74147	7.53138	4.52356	8.16491	7.88874	7.18982	6.16993	0	3.32193	0	4	0	0	5.75489	4.24793	2.32193	0	5.72792	5.12928	7.11894
ATXN3	3	6.42626	1.58496	4.58496	2.32193	6	1.58496	4.24793	0	2.32193	2	3.45943	1	0	1	1	0	1.58496	3.16993	0	3.32193	0	3	0	0	0
ATXN7L3	0	0	0	0	1	0	0	0	0	0	0	0	0	0	0	0	0	0	0	0	0	0	0	0	0	0
AUH	0	0	0	0	3.90689	0	0	1.58496	0	0	4.08746	2	2.80735	0	0	0	0	0	0	0	0	0	0	0	0	0
AUP1	1.58496	4.52356	4.64386	5.08746	6	5.58496	4.08746	5.97728	4.75489	3.70044	6.49185	6.58496	4.75489	0	0	0	2.58496	0	3.58496	4	2.32193	0	1	0	5.75489	6.26679
AURKA	0	0	0	0	3.90689	0	0	0	0	0	0	0	0	0	0	0	0	0	0	0	0	0	0	0	0	0
AVL9	1	2	0	4.75489	3.90689	5.75489	5.61471	0	4.52356	3.70044	1	3.45943	2.58496	0	0	0	0	0	4.16993	3.80735	0	0	0	0	4.08746	0
AWAT1	0	0	0	0	2.58496	0	0	0	0	0	0	0	0	0	0	0	0	0	0	0	0	0	0	0	0	0
AZGP1	0	4.39232	0	2.80735	3.58496	1	4	4.39232	1	5.42626	3.70044	0	1	0	0	0	0	0	2.32193	0	0	0	0	0	3.90689	1.58496
AZIN1	0	0	0	0	1	0	0	0	0	0	0	0	0	0	0	0	0	0	0	0	0	0	0	0	0	0
AZU1	3.58496	3.58496	1	0	2.80735	0	0	0	3.80735	0	0	0	3.58496	6.55459	4.80735	3.16993	3.32193	4.52356	3.32193	1	5.42626	2	4.32193	0	0	0
B2M	0	5.70044	5.2854	3.80735	3.90689	5.80735	4.9542	5.58496	5.42626	5.35755	5.45943	2.32193	4.9542	5.49185	5.24793	5.04439	4.9542	5.97728	4.64386	5.49185	3.16993	4.85798	4.45943	0	4.80735	4
B3GAT3	0	3.70044	3.70044	4.9542	4.75489	3.70044	4.70044	3.45943	0	0	3	1.58496	0	0	0	0	1	0	4.32193	1	0	0	0	0	4.52356	4.58496
B3GNT7	0	0	0	1	4.08746	0	2	0	2	0	0	0	0	0	0	0	0	0	0	0	0	0	0	0	0	0
B4GALNT1	0	0	0	1	1.58496	0	1.58496	0	2	0	0	0	0	0	0	0	0	0	0	0	0	0	0	0	0	0
B4GALT1	0	4	3	5.20945	5.83289	5.90689	6.62936	4.70044	0	3.45943	5.2854	4.75489	1.58496	0	0	0	2.32193	0	4.32193	3	0	0	1.58496	3.32193	5	3.70044
B4GALT3	0	0	0	2.58496	1	0	0	0	0	0	0	0	0	0	0	0	0	0	0	0	0	0	0	0	0	0
B4GALT4	0	1.58496	0	0	2	0	2.80735	4.16993	0	0	0	0	0	0	0	0	0	0	0	0	2.32193	3	2.32193	0	4.39232	0
B4GALT5	0	0	0	0	3.45943	3.45943	4.08746	0	0	0	0	0	0	0	0	0	0	0	0	1.58496	0	0	0	0	0	0
B4GALT7	0	0	0	0	3.80735	0	2.58496	0	1	0	0	0	0	0	0	0	0	0	0	0	0	0	0	0	1	1.58496
B4GAT1	0	0	2.58496	3.32193	4.52356	5.32193	3.16993	4.16993	3.16993	2	0	3	2.32193	0	0	0	1	0	0	2.32193	1.58496	0	0	0	4.39232	2
BAALC	0	2.32193	0	0	1.58496	0	1.58496	1	0	0	0	0	0	0	0	0	0	0	0	0	0	0	0	0	0	0
BABAM1	2.32193	6.88264	2	2.32193	2.32193	3.45943	6.2854	3	3.32193	0	0	5.16993	0	0	1.58496	3.70044	0	0	0	0	2	3.80735	0	0	0	0
BACE1	1	0	0	0	2	1.58496	0	0	1.58496	0	0	0	0	0	0	0	0	0	0	0	0	0	0	0	0	0
BAG2	0	0	0	0	3.45943	0	1	0	0	3	1	4.08746	4.64386	0	2.80735	0	0	0	0	0	2.58496	3.58496	2.32193	2.32193	1	0
BAG3	0	0	0	5.93074	4.24793	3.70044	5.45943	5.80735	1.58496	6.24793	5.20945	4.08746	4.90689	0	3	3	0	0	6.06609	0	0	0	0	0	0	3.70044
BAG4	0	0	0	0	0	0	3	3.70044	2.32193	0	0	1.58496	2.58496	0	0	0	0	0	0	0	0	0	0	0	2	0
BAG5	0	2.32193	0	0	2.58496	4.58496	0	3.80735	2.80735	0	5	4.64386	1.58496	0	0	0	0	3.45943	0	0	3.45943	2.80735	1.58496	0	3.90689	0
BAG6	6.02237	7.93074	6.53916	8.61839	8.40514	7.40088	9.05257	6.45943	5.85798	7.55459	7.2384	8.67243	6.45943	0	4.16993	3.58496	4.08746	5.12928	6.76818	5.04439	6.40939	3.70044	5.16993	6.42626	7.50779	4.90689
BAGE4	1	0	0	0	1.58496	0	0	0	0	0	0	0	0	0	0	0	0	0	0	0	0	0	0	0	0	0
BAGE5	0	0	0	0	1	0	0	0	0	0	0	0	0	0	0	0	0	0	0	0	0	0	0	0	0	0
BAIAP2	5.45943	3.80735	0	6.30378	4.16993	6.76818	4	5.9542	3.16993	5.67243	6.02237	2.58496	5.35755	3.58496	3.16993	2.58496	0	0	6.2854	2.80735	4.80735	2.32193	5	2	2.58496	5.39232
BAIAP2L1	7.91886	0	0	0	3.80735	5.16993	6.97728	4.58496	3.70044	4.24793	5.08746	5.08746	4.90689	0	0	1.58496	0	0	2.80735	3.70044	0	2.80735	0	2.80735	4.70044	4.32193
BAIAP2L2	0	0	0	0	5.58496	2.58496	2.58496	3.70044	0	4.24793	3.80735	2.80735	0	0	0	0	0	0	1	0	0	3.16993	0	0	2	1
BAK1	0	4.58496	4.32193	4.32193	3.80735	1	3.32193	4.70044	2	3.16993	2.32193	3	0	0	0	1	2.32193	0	1.58496	1	1.58496	0	1.58496	0	4.45943	4.64386
BANF1	6.37504	6.2854	4.58496	4.85798	5.16993	4.58496	5.49185	5	4.9542	5.35755	4.64386	4.58496	3.90689	3.16993	5.55459	3.80735	4.16993	4.45943	5.24793	1.58496	4.08746	4.58496	4.75489	4.85798	4.16993	3.80735
BASP1	0	4.08746	5.39232	0	2.80735	2	1.58496	3.70044	0	0	3.32193	0	3.45943	0	0	4.45943	0	3.16993	0	2.80735	0	3.70044	5.35755	0	0	0
BAT3	4	5.12928	0	5.52356	6.37504	5.39232	6.9542	0	4.52356	4.58496	0	5.2854	2.80735	0	4.52356	3	2.80735	2.80735	0	3.80735	4.85798	2.58496	3.70044	3.16993	5.24793	1
BAX	6.90689	7.31288	8.26209	6.45943	7.21917	7.76818	7.20945	6.96578	6.59991	6.90689	5.32193	7.13955	6.37504	7.19967	5.64386	4.45943	5.58496	5.78136	5.78136	6.22882	6.06609	3.80735	4.45943	5.2854	7.39232	5.49185
BAZ1A	0	2.80735	3.70044	5	5.90689	0	4.52356	4.16993	3.45943	4.75489	6.24793	0	0	3	0	0	0	3.16993	0	0	0	4	0	0	2	0
BAZ1B	4.70044	0	0	0	5.45943	0	5.58496	0	4.45943	0	0	3.58496	0	0	2.58496	0	3.45943	0	3.80735	0	0	0	0	0	0	0
BBS2	0	0	0	0	1.58496	0	0	0	0	0	0	0	0	0	0	0	0	0	0	0	0	0	0	0	0	0
BCAP29	0	5.9542	7.11894	6.26679	6.32193	7.29462	6.24793	7.33985	4.85798	6.49185	7.11894	6.85798	6.32193	3.45943	0	3.32193	0	4.24793	6.33985	4	4.39232	0	1	1.58496	4.45943	2
BCAP31	7.57743	8.11894	7.92481	7.87652	7.26679	8.80413	7.74819	8.10329	8.03342	7.35755	8.04985	8.07146	8.04985	5.64386	6.02237	7.10852	6.78136	5.88264	8.13955	7.45121	6.49185	5.78136	6.44294	3.70044	7.45943	6.67243
BCAS2	0	3.80735	2.80735	3.16993	3.70044	3.70044	3.90689	4.45943	2.32193	3.70044	3.32193	4.16993	2.80735	2	3	0	1.58496	0	3.90689	0	3.16993	2.32193	3.58496	3.16993	3.16993	2.58496
BCAT1	0	0	0	0	3.80735	0	0	1.58496	0	0	0	0	0	0	0	0	2.80735	0	0	0	0	0	0	0	0	1.58496
BCAT2	7.25739	6.87036	2.58496	6.45943	8.28077	9.24555	7.21917	6.75489	6.16993	4	5.39232	6.79442	5.16993	6.04439	6.02237	0	5.85798	2.58496	8.81698	3.45943	8.38802	4.08746	6.72792	6.74147	6.91886	3.16993
BCCIP	0	3.80735	0	5.78136	4.39232	0	1.58496	4.58496	1	4.32193	2.32193	4.16993	3	0	0	0	0	0	1	0	0	0	0	2.58496	2	3.58496
BCKDK	0	3.16993	0	4.90689	1.58496	2.80735	4.32193	4.85798	0	0	4.90689	3.32193	4.45943	0	0	1.58496	0	0	2	0	2	0	1	0	2.32193	2.32193
BCL2L1	1	5.08746	3.45943	2.80735	3.32193	5.08746	5.45943	3.45943	3	4.90689	3.58496	2.32193	0	0	0	1.58496	0	0	1.58496	3	2.58496	1.58496	0	0	3.58496	4.32193
BCL2L13	4.52356	5.45943	4.45943	3.80735	5.61471	5.35755	6.49185	5.52356	4.58496	6.37504	6.52356	2.58496	4.64386	0	2.32193	4.08746	5.24793	4.45943	4.16993	4.32193	6.20945	5.08746	4.9542	0	5.97728	5.90689
BCL2L15	1.58496	0	0	0	4.32193	5.04439	2.80735	3.32193	2	3.16993	4.24793	4.52356	4.52356	0	0	0	0	0	0	2	0	1.58496	0	0	5.35755	3.45943
BCL2L2	0	3.45943	3.80735	4.64386	3	4.70044	3.70044	4.75489	0	4.90689	4.9542	2.58496	0	0	0	3	3	0	4.08746	1	0	3.80735	2.58496	0	3.90689	5
BCL7A	0	0	0	1.58496	2.32193	0	3.58496	2	0	0	3	3.70044	0	0	0	0	0	0	0	2	0	0	0	0	0	0
BCL7B	0	0	0	3.70044	3.16993	3.90689	4.32193	3.90689	0	4.08746	3.70044	3.58496	2.80735	0	0	0	0	0	0	1	0	0	0	0	0	0
BCL7C	0	2.32193	0	3	4.58496	2.58496	4.24793	4.24793	2.80735	3.45943	3	3.16993	2.58496	0	1	0	0	0	0	0	0	0	0	0	2	2
BCL9L	0	0	0	0	3.70044	0	0	0	0	0	4	0	0	0	0	0	0	0	0	0	0	0	0	0	0	0
BCLAF1	1	6.22882	1.58496	7.20945	7.26679	6.45943	7.10852	5.2854	4.9542	7.49185	7.79442	7.40088	6.53916	0	0	0	0	0	4.16993	0	0	4.80735	0	4.85798	6.04439	4.58496
BCOR	0	0	0	0	2.58496	0	0	4.64386	0	0	0	0	0	0	0	0	0	0	0	0	4.08746	1	0	0	0	0
BCS1L	3.80735	6.06609	2.58496	1.58496	6.58496	4.90689	6.80735	4.80735	6.33985	5.16993	5.90689	4.70044	3.45943	0	1	0	3.16993	0	3.80735	2	4.75489	4.08746	4.08746	6.71425	4.75489	6.76818
BDH1	0	0	0	4	1.58496	7.16993	6.18982	6.18982	2	5.97728	6.93074	2.32193	3.16993	2.80735	0	0	0	0	2	3.16993	2	0	0	3.16993	4.45943	6.64386
BEST4	0	0	1	0	2.58496	0	0	0	0	0	0	0	0	0	0	0	0	0	0	0	0	0	0	0	0	0
BET1	0	2.80735	2.58496	2	3.16993	3.90689	2.32193	3.90689	3.58496	4.52356	4.39232	3.58496	2	0	0	2	0	0	3.80735	2	2	0	2.58496	2.32193	3.80735	4.75489
BET1L	0	1.58496	0	1.58496	3.32193	3.90689	0	3.58496	0	2.32193	0	0	0	0	0	0	0	0	2	4	1	0	0	0	2.80735	4.08746
BFSP1	0	0	0	0	2	1.58496	0	0	0	0	0	0	0	0	0	0	0	0	0	0	0	0	0	0	0	0
BID	6.40939	7.04439	5.08746	4.75489	5.49185	5.45943	6.18982	4.58496	5.52356	5.61471	5.32193	4.90689	5	6.44294	3.80735	6.14975	5	6.67243	4.9542	5.16993	6.67243	5.39232	5	4.08746	5.32193	5.55459
BIN1	0	3.58496	3	5.39232	4.52356	3.70044	3.90689	5.52356	0	4.08746	4.39232	4.08746	4.08746	0	4.08746	0	2.80735	0	0	0	3.32193	0	4.08746	0	4.08746	3.32193
BIN3	0	0	0	0	1.58496	0	0	0	0	0	0	0	0	0	0	0	0	0	0	0	0	0	0	0	0	0
BIRC2	0	0	0	0	2	0	0	0	1.58496	0	0	1	0	0	0	0	0	0	0	1	0	3.16993	0	0	2.32193	0
BLCAP	0	0	0	0	0	0	0	0	0	0	0	0	0	0	0	0	0	0	0	0	0	0	0	0	0	0
BLMH	4.16993	5.12928	2.58496	0	2.80735	2	6.64386	4.70044	5.04439	2	3.58496	5.16993	4.58496	0	1.58496	0	4.58496	3.16993	0	0	0	0	3.32193	1.58496	0	6.22882
BLOC1S1	3	3.58496	2.80735	0	1.58496	4.45943	3.16993	2.58496	1	0	0	0	2.32193	0	1	0	2.58496	0	2	2.80735	1	0	2.80735	0	2.32193	3.90689
BLOC1S2	0	4.32193	1	0	1	0	2.80735	0	3.58496	1.58496	0	0	0	2	2.80735	0	2.32193	1	0	0	1.58496	2	2.32193	2	0	1
BLOC1S6	1.58496	4.24793	0	0	0	2	1	0	3.16993	0	1	0	0	2.80735	1	0	1	1.58496	1.58496	0	1	0	2	0	2	1
BLVRA	5.16993	7.60733	7.31288	6.35755	5.78136	4.80735	3.90689	5.04439	2.80735	4.16993	4.32193	3.32193	4.39232	0	3.58496	5.97728	5.93074	5.32193	3.80735	4.85798	0	3.58496	0	2.58496	5.9542	3.90689
BLVRB	3.32193	8.25267	7.29462	6.71425	7.04439	8.04439	7.18982	6.30378	4.80735	6.83289	7.30378	6.45943	6.12928	1	4.16993	5.75489	6.02237	5.93074	6.20945	8.19967	7.26679	5.42626	0	0	7.02237	5.55459
BMS1	0	0	0	0	3.45943	0	5.75489	0	0	0	0	0	0	0	0	0	0	0	0	0	0	3.80735	0	0	0	0
BNIP1	4.45943	6.02237	3.58496	4.24793	7.21917	4.58496	5.72792	5.58496	5.39232	4.58496	6.10852	5.12928	3.16993	4.39232	0	3.16993	2	3.16993	2.58496	3.45943	4.32193	3	3.70044	5.24793	5.12928	4.80735
BNIP2	0	4.9542	0	0	1	0	2.32193	0	0	2.58496	0	0	0	0	1	0	0	0	0	0	0	0	0	0	0	0
BOC	0	1	1	1	0	0	0	0	0	0	0	0	1	0	0	0	0	0	0	0	0	0	0	0	0	0
BOK	0	0	0	0	2.80735	0	0	0	0	0	1	0	0	0	0	0	0	0	0	0	0	0	0	0	0	0
BOLA2	3.90689	3.45943	2.32193	5.24793	4.39232	4.90689	5.67243	5.08746	3.32193	5.58496	4.85798	4.45943	2.58496	0	3.16993	2.58496	1.58496	0	2.58496	5.45943	3.32193	2.58496	0	3	3.32193	4
BOLA2B	0	0	0	3.16993	0	0	0	2.32193	0	0	0	0	0	0	0	0	0	0	0	0	0	0	0	0	0	1
BOLA3	0	0	0	0	3.32193	0	3.16993	1.58496	0	0	0	0	0	0	0	0	0	0	0	2	0	0	0	0	0	1.58496
BOP1	0	0	0	1	4.39232	2.58496	5.64386	5.39232	2.58496	4.16993	5.67243	6	1.58496	0	0	0	0	0	4.45943	0	0	4.52356	0	5.12928	4.32193	3.80735
BORA	0	0	0	0	4	0	0	2.32193	0	0	0	2.80735	0	0	0	0	0	0	0	0	0	0	0	0	0	0
BORCS8	0	0	0	0	1.58496	0	1.58496	0	0	0	1	0	0	0	0	0	0	0	0	0	0	0	0	0	0	0
BPGM	0	0	1.58496	0	0	2	0	0	0	0	0	0	0	0	0	0	0	0	3	6.91886	0	0	0	0	0	0
BPHL	0	2.58496	0	0	4.08746	1.58496	3.32193	0	0	0	3.58496	0	2.80735	0	0	0	0	0	0	0	0	0	0	0	3.90689	2
BPI	7.93664	6.50779	0	2.32193	3.32193	0	4.08746	1	6.24793	0	0	0	3	7.14975	6.45943	4.64386	4	5.93074	5.75489	0	7.09803	2.32193	6.78136	4.75489	3.70044	0
BPIFB2	0	0	0	0	1	0	0	0	0	0	0	0	0	0	0	0	0	0	0	0	0	0	0	0	0	0
BPIFB4	0	0	0	0	0	0	0	0	0	0	0	0	0	0	0	0	0	0	0	0	0	0	0	0	0	0
BPNT1	2.32193	5.49185	5.24793	7.93074	5.32193	7.81378	6.14975	6.10852	5.16993	4	6.45943	7.13955	7.81378	0	0	0	1.58496	0	3.70044	5.72792	3.32193	0	0	3.16993	6.59991	6.79442
BRAT1	4.58496	5.12928	0	5	5.45943	4.9542	6.97728	5.08746	2.58496	4.64386	0	5.72792	3.16993	0	0	0	1.58496	0	0	0	2.32193	0	0	2.80735	5.72792	2.32193
BRD7	0	4	0	0	3.58496	0	4	4.08746	0	0	2.58496	1	2	0	0	0	0	0	0	0	1.58496	0	0	0	0	0
BRD8	0	2.58496	0	2.58496	2.80735	0	0	3	0	2.32193	0	0	1	0	1.58496	0	0	0	0	0	0	0	0	4.16993	4.75489	0
BRE	1.58496	6.47573	4.32193	4.16993	3.32193	3.45943	2.80735	4.24793	4.64386	2.80735	3.58496	1.58496	3.45943	0	0	0	0	0	0	0	1	0	1.58496	0	2.32193	3.90689
BRF1	0	2.58496	2.58496	0	1.58496	2.80735	2.32193	0	0	0	0	0	0	1.58496	0	0	0	0	0	1.58496	0	0	0	0	3.32193	0
BRI3BP	4.16993	4.45943	3.70044	4.24793	3.70044	4.85798	5	3.32193	4.58496	3.45943	4.32193	4.32193	4	4.08746	0	2.80735	1.58496	2	4.08746	3.80735	4.08746	2.58496	1	4.32193	3	1.58496
BRIX1	4.85798	2.80735	0	0	5.9542	2.80735	5.58496	0	2	3.16993	0	0	0	0	1.58496	0	1.58496	3.32193	3.58496	0	3.70044	3	3.16993	3.90689	0	0
BRK1	1.58496	3	0	2.58496	0	3.16993	2	3.70044	2.80735	2.32193	0	1	0	0	3.32193	2	3.58496	1	0	0	0	1	2	1.58496	3.45943	2
BROX	5.16993	6.37504	5.42626	7.84549	6.82018	7.14975	5.45943	6.04439	5.2854	5.16993	5.35755	6.84549	7.06609	0	0	2	3.45943	4.39232	5.32193	5.20945	5.90689	3.45943	0	0	5.16993	4.39232
BRP44L	0	2.32193	0	0	1	1.58496	3.32193	2.32193	0	1	0	0	0	0	0	0	0	0	1	0	0	0	0	0	2	0
BRSK2	0	0	1.58496	1.58496	1.58496	0	0	0	0	2.58496	0	0	0	0	0	0	0	0	0	0	0	0	0	2.58496	0	0
BSCL2	0	2.58496	0	3	3	3.90689	4.85798	4.45943	2	1.58496	0	2.32193	0	0	0	0	0	0	0	1	0	0	0	0	5.2854	0
BSDC1	2.32193	3	0	0	2.58496	5.16993	6.06609	1.58496	4.80735	3.45943	5.08746	4.16993	4.39232	0	1	0	1	0	4.58496	0	4.80735	4.16993	1	2.32193	4.52356	6.67243
BSG	7.66534	8.07682	6.20945	5.88264	7.33092	8.50779	8.26209	7.33985	6.70044	7.25739	7.52356	7.14975	6.33985	6.62936	6.94251	6.65821	6.16993	7.65105	7.70044	5.58496	7.33092	6.97728	7.18982	7.46761	7.34873	6.53916
BST1	5.2854	6.80735	4.80735	0	2.80735	4.08746	6.12928	6.49185	6.76818	0	4.08746	0	5.12928	7.74147	2	4	4.08746	5.85798	5.2854	0	5.58496	5.72792	5.52356	2.32193	0	2.58496
BST2	2.32193	6	3.80735	2.58496	1	3.90689	6.49185	0	2.80735	3.80735	1	0	3.90689	2.32193	1	3	1	3	0	0	2	2	2.32193	1	0	0
BTBD2	0	1	0	0	1.58496	1	0	0	0	0	0	0	0	0	0	0	0	0	0	0	0	0	0	0	0	0
BTBD3	0	0	0	0	2.80735	0	2.32193	1.58496	0	0	0	0	0	0	0	1.58496	1.58496	0	0	0	0	0	1	0	0	0
BTBD8	0	0	0	0	4.24793	0	0	0	0	0	0	0	1.58496	0	0	0	0	0	0	0	0	0	0	0	0	0
BTF3	0	4.24793	2.80735	3	4.58496	3.70044	5.20945	5.12928	0	6.47573	5.35755	6.06609	5.04439	0	1	3.16993	2.32193	1.58496	0	1	2.58496	4.32193	3.80735	4.64386	5.42626	4.58496
BTF3L4	0	4	2.58496	4.24793	2.80735	0	3.45943	4.24793	1	4.08746	3.58496	3.90689	1.58496	0	0	0	1.58496	0	0	0	0	0	1	0	4.39232	4.16993
BTN2A1	0	0	0	0	3.32193	0	0	0	0	0	0	0	0	0	0	0	0	0	0	0	0	0	0	0	3.16993	0
BTN2A2	0	0	0	0	3.16993	0	4.16993	1	0	0	0	0	1.58496	0	0	0	0	0	0	0	0	0	2	0	0	0
BTNL2	0	0	0	0	2.32193	0	0	0	0	0	0	0	0	0	0	0	1.58496	0	0	0	0	0	1.58496	2.32193	0	0
BUB1B	0	0	0	0	1.58496	0	0	0	0	0	0	0	3.80735	3.45943	0	0	0	0	0	0	0	0	4.39232	0	0	0
BUB1B-PAK6	0	0	1.58496	0	0	0	2	0	0	0	0	0	0	0	0	0	0	0	0	0	0	0	0	0	0	0
BUB3	0	5.52356	4.70044	5.45943	5.97728	6.14975	6.53916	5.88264	3.58496	3.80735	5.16993	5.88264	4.80735	0	3.58496	4.9542	0	2	4.16993	3.16993	4	4.39232	4.16993	0	5	5.2854
BYSL	3.70044	3.16993	1	0	5.49185	4.16993	5.75489	5.12928	0	2.58496	4.80735	3.80735	2	0	0	0	0	0	3	0	1.58496	2	3.80735	4.39232	4	4.16993
BZW1	6.62936	7.52356	6.83289	7.82655	9.24555	7.57743	9.44915	7.53916	5.70044	6.93074	7.59991	7.91886	7.69349	2	3.45943	2.58496	6.37504	2.32193	5.78136	7.14975	4.9542	3.70044	4.45943	6.88264	7.97728	6.9542
BZW2	8.10329	6.97728	5.9542	8.45533	9.17991	8.10329	9.42206	8.13443	6.22882	7.90689	7.55459	8.71768	6.67243	0	0	4.32193	3.45943	3	7.14975	6.91886	6.22882	5.88264	6.42626	8.12928	8.45121	7.36632
C10orf107	0	0	0	0	2	0	0	0	0	0	0	0	0	0	0	0	0	0	0	0	0	0	0	0	0	0
C10orf131	0	0	0	0	1	0	0	0	0	0	1.58496	0	0	0	0	0	0	0	0	0	0	0	2.80735	0	0	0
C10orf35	0	1.58496	2	3.58496	4.45943	4	3.58496	3.16993	3.16993	2.32193	2.32193	0	2.32193	0	0	0	0	0	0	0	0	1	2	0	2.32193	1
C11orf24	0	0	0	0	0	0	0	0	0	0	2.80735	0	1.58496	0	0	0	0	0	0	0	0	0	2	0	0	0
C11orf54	2.80735	6.2854	5.58496	4.75489	6.12928	6.02237	0	6.65821	3.32193	4.52356	6.06609	4.32193	5.80735	2.80735	2.32193	4.85798	3.45943	1.58496	0	0	0	2	0	0	6.45943	5.55459
C11orf74	0	0	0	0	2	0	0	0	0	0	0	0	1	0	0	0	0	0	1.58496	0	0	0	0	0	0	1
C11orf95	0	0	0	0	1.58496	0	0	0	0	0	0	0	0	0	0	0	0	0	0	0	0	0	0	0	0	0
C11orf96	0	0	0	0	2.58496	0	0	1	0	0	0	0	0	0	0	0	0	0	0	0	0	0	0	0	0	0
C12orf10	4.85798	4.52356	4.08746	3.58496	5.04439	6.2854	6.32193	5.67243	5	5	4.70044	5.52356	4.32193	0	3	4.24793	3.70044	1.58496	2	0	0	3.90689	3.32193	4.64386	4.45943	0
C12orf42	0	0	0	0	1	0	0	0	0	0	0	0	0	0	0	0	0	0	0	0	0	0	0	0	0	0
C12orf43	0	0	0	3.70044	5.32193	0	5.97728	4.52356	2	5.97728	7.46761	6.04439	4.32193	0	2.32193	2.32193	1	0	0	0	4.32193	1	2	0	3.16993	5.20945
C12orf57	0	1	0	4.85798	0	3.58496	2.58496	4.24793	3.32193	4.08746	0	3.70044	4.24793	0	0	0	0	0	1.58496	0	0	1	0	0	0	3.90689
C12orf75	0	0	0	0	1	3.16993	3.58496	0	0	0	0	0	0	0	0	0	0	0	0	0	0	3	0	0	0	0
C14orf142	0	2.80735	1	2.32193	2.32193	3.16993	2.80735	2	1.58496	3.16993	2.32193	1.58496	2	0	3.16993	1.58496	1	1	0	0	2.58496	1.58496	1.58496	3.16993	1.58496	2.32193
C14orf166	7.08746	8.40088	5.97728	6.96578	8.55842	8.32643	8.48784	7.82018	7.30378	7.11894	6.98868	7.07682	6.04439	4.45943	5.85798	3.80735	5.90689	5.35755	7.04439	1.58496	6.32193	6.42626	6.49185	6.88264	7.03342	6.72792
C14orf93	0	0	0	0	1	0	0	0	0	1.58496	0	0	2	0	0	0	0	0	2.32193	2.32193	0	0	1	0	0	0
C15orf39	0	1	0	0	3.16993	0	0	0	0	0	0	0	0	0	0	0	0	0	0	0	0	0	0	0	1	0
C15orf41	3.90689	0	0	0	1	0	1.58496	0	0	0	0	0	0	0	0	0	0	0	0	0	0	0	1.58496	1	0	0
C15orf53	0	0	0	0	1	1.58496	1.58496	0	0	0	0	0	0	1	0	0	0	0	0	0	2.32193	0	0	0	0	0
C15orf54	0	0	0	0	2.58496	0	0	0	0	0	0	0	0	0	0	0	0	0	0	0	0	0	0	0	0	0
C15orf57	0	4.58496	2	0	0	1.58496	2.80735	3	0	1.58496	0	0	1	0	0	0	1	2	0	0	0	0	0	0	0	2
C16orf58	2.32193	4.16993	3	5.35755	5.58496	7.18982	5.35755	5.35755	5.97728	2	5.42626	2	3.70044	0	0	0	2.58496	0	3.80735	0	4.24793	1	1	3.80735	5.16993	5.35755
C16orf59	0	0	0	0	2	0	1	0	0	0	0	1	2	0	0	0	0	0	0	0	1.58496	0	0	0	0	0
C16orf62	5.61471	8.95128	6.67243	3.58496	1.58496	0	0	6.39232	2.58496	4.24793	0	0	2.32193	0	0	4	3.70044	5	4	0	0	0	3	0	5.32193	0
C16orf87	0	0	0	0	0	0	0	0	0	0	0	0	1	0	0	0	0	0	0	0	0	1.58496	0	0	0	0
C16orf95	0	0	0	0	1	0	0	0	0	0	0	0	0	0	0	0	0	0	0	0	0	0	0	0	0	0
C17orf50	0	0	2	0	0	0	0	0	0	0	0	0	0	0	0	0	0	0	0	0	0	0	0	0	0	0
C17orf62	3.58496	7.49985	5.52356	5.08746	5.75489	5.78136	7.20945	3.90689	5.2854	4.39232	6.10852	3.58496	3.90689	2.32193	0	5.08746	4.85798	2.80735	3.80735	4.16993	2.32193	3.58496	0	2.32193	5.93074	3
C17orf75	0	3.58496	0	4	5.55459	4.64386	6.49185	3.70044	0	1.58496	4.39232	4.52356	0	0	0	0	0	0	1	0	0	0	0	0	4.08746	3.45943
C19orf12	0	1	0	0	3.32193	0	2.32193	0	0	0	0	0	0	0	0	0	0	0	0	0	0	0	0	0	0	0
C19orf43	0	3.90689	0	0	4.58496	0	5.32193	0	0	0	0	3.16993	0	0	0	3.32193	0	0	0	0	0	0	0	0	0	0
C19orf45	0	0	0	0	0	0	1	0	0	0	0	0	0	0	0	0	0	0	0	0	0	2.58496	0	0	1.58496	0
C19orf48	0	0	0	0	0	0	0	0	0	0	0	0	0	0	0	0	0	1	0	0	0	0	0	0	0	0
C19orf52	0	1.58496	0	0	2.80735	0	2.32193	0	0	0	2.80735	1.58496	0	0	0	0	0	0	0	0	0	0	0	0	2	0
C19orf66	0	0	0	0	0	0	0	0	0	0	0	0	0	0	0	0	0	0	0	0	0	0	0	0	1	0
C19orf70	0	4.58496	0	0	0	2	3	3.90689	0	2	3.90689	1	2.80735	0	0	0	1	0	3.16993	0	0	0	1	0	1.58496	2
C1D	0	0	0	0	0	0	0	0	0	0	0	0	0	0	0	0	0	0	0	1	0	0	0	0	0	0
C1orf106	0	0	0	0	4.08746	0	0	3.70044	0	0	0	4.16993	0	0	1	1.58496	0	0	0	0	0	0	2.58496	0	0	0
C1orf122	0	3	0	1.58496	0	0	4.39232	2	0	2.32193	0	1	1	0	0	0	0	0	0	0	0	0	0	0	1	1.58496
C1orf123	0	3.90689	2.80735	3.70044	1.58496	2.32193	3	2.58496	0	2.58496	4.08746	3.16993	1	0	2.80735	0	1	0	0	2.32193	0	0	1	0	2.32193	3.32193
C1orf131	0	0	0	1	1.58496	0	0	0	0	0	2	0	0	0	0	0	0	0	0	0	0	0	1.58496	0	0	0
C1orf141	0	1	0	2.32193	3	0	0	2.32193	0	0	0	0	0	0	0	0	0	0	0	0	0	0	0	0	0	0
C1orf228	0	0	0	0	1	0	0	2	0	0	1	0	0	0	0	0	0	0	0	0	0	0	0	0	0	0
C1orf43	0	0	0	0	3	1.58496	3.16993	0	0	0	4	0	0	0	0	0	0	0	0	0	0	0	0	0	3.58496	0
C1orf52	0	0	0	1	2	1	4.39232	0	0	0	0	1	0	0	0	0	0	0	0	1.58496	0	0	0	0	1	0
C1orf61	0	0	0	0	0	0	0	0	0	0	0	0	0	0	0	0	0	0	0	0	0	0	0	0	0	0
C1QBP	4.52356	6.35755	3.80735	3.70044	6.9542	6.22882	6.20945	5.85798	2.58496	5.55459	5.93074	6.2854	5.24793	0	3.70044	5.49185	1	4.39232	6.71425	4.58496	4.39232	5.2854	4	4.45943	6.02237	6
C1QC	0	4.85798	2.32193	0	4.58496	2	3.32193	1	0	0	2.80735	2	1.58496	0	0	1.58496	0	0	0	5.20945	0	0	0	0	1.58496	0
C1QTNF8	3	0	0	0	1.58496	0	0	0	0	0	0	0	0	0	0	0	0	0	0	0	0	0	0	0	0	0
C1QTNF9B-AS1	0	0	0	0	1	0	1	0	0	0	0	0	0	0	0	0	0	0	0	0	0	0	0	0	1	0
C1R	0	0	0	0	3	3	0	2.32193	0	2.32193	0	0	0	3.16993	0	0	0	0	0	6.39232	0	3.45943	0	3.80735	0	0
C1RL	0	2	0	0	1.58496	0	0	2.80735	0	0	0	0	0	0	0	0	0	0	0	4.08746	0	0	0	0	0	0
C2	0	4.08746	5.20945	0	2.32193	0	3.32193	5.20945	0	4	0	0	2.58496	0	0	0	3.16993	3.16993	0	7.91886	0	0	3	1	1	0
C20orf196	0	1.58496	0	0	1.58496	0	0	0	0	0	0	0	0	1	0	0	0	0	0	0	1	0	0	0	0	0
C20orf27	0	5.04439	0	0	4	1	3.45943	3.16993	0	0	4	0	0	0	0	0	2.58496	0	1.58496	1	0	0	2.58496	0	2	3.70044
C21orf33	2.58496	7.70044	6.20945	5.52356	7.55459	7.14975	5.80735	6.26679	4	7.11894	6.30378	5.75489	6.08746	0	5.08746	4.80735	4.90689	4.08746	5.75489	4	2.80735	5.16993	5.20945	4.24793	5.9542	6.84549
C21orf58	0	0	0	0	1	1	0	0	0	0	0	0	0	0	0	0	0	0	0	0	0	0	0	0	1	0
C21orf59	0	0	0	0	1.58496	2	2	0	1.58496	0	0	0	0	0	0	0	1.58496	0	0	1	3.16993	0	0	0	2.80735	0
C21orf62-AS1	0	0	0	0	1	0	0	0	0	0	0	0	0	0	0	0	0	0	0	0	0	0	1	0	0	0
C22orf23	0	0	2	0	1.58496	0	0	0	0	0	0	0	1.58496	0	0	0	0	0	0	0	0	0	0	0	0	0
C22orf46	0	0	0	1.58496	1	0	0	0	0	0	0	0	0	0	0	0	0	0	0	0	0	0	0	0	0	0
C2CD2	0	0	0	0	4.70044	0	3.16993	2.32193	0	0	0	0	0	0	0	0	0	0	0	0	0	0	0	0	0	0
C2CD2L	0	4.08746	5.20945	4.32193	4.08746	3	4.52356	4	1.58496	0	2.32193	0	0	0	0	0	0	0	0	0	0	0	0	0	2	0
C2CD5	0	4.70044	0	0	2.32193	0	0	2.58496	2.32193	0	1.58496	5.04439	1.58496	0	0	5.24793	0	0	0	0	0	0	0	0	0	0
C2orf47	0	2	0	2	3.16993	2.80735	2.58496	2	2.58496	2.32193	2.80735	2.80735	0	0	1.58496	0	0	0	3	1.58496	0	0	2	3	1	2.32193
C2orf80	0	0	0	0	1	0	0	0	0	0	0	0	0	0	0	0	0	0	0	0	0	0	0	0	0	0
C3	6	9.97871	8.87036	5.16993	7.27612	6.83289	8.04985	9.60548	6.78136	6.10852	7.04439	8.79766	6.52356	4.08746	8.20457	8.47978	8.29462	9.08215	8.0607	9.49586	4.70044	7.35755	6.42626	7.06609	9.38154	4.75489
C3orf33	0	0	0	0	0	0	0	0	0	0	0	0	0	0	0	0	0	0	0	0	0	0	0	0	0	0
C3orf79	0	0	0	0	0	0	0	0	0	0	0	0	0	0	0	0	0	0	0	0	0	0	0	2.32193	0	0
C4A	0	10.4584	5.2854	4.90689	7.83289	3.70044	7.14975	8.29462	7.3837	5.04439	5.04439	8.8009	4.85798	0	3.45943	7.02237	7.81378	9.26679	8	7.67948	0	6.39232	5.61471	5.9542	8.72792	0
C4B	0	9.66356	4	3.32193	7.45121	5.04439	7.10852	7.85175	5.20945	4.16993	5.72792	8.10852	4.80735	0	4.24793	6.6865	7.12928	8.24793	7	6.62936	0	5.61471	3.90689	5.39232	7.74819	0
C4B_2	0	8.57743	4.16993	0	6.67243	3.45943	7.17991	6.84549	5.39232	4.08746	4.64386	7.02237	4.24793	0	4.58496	5.08746	6.06609	6.91886	6.14975	5.90689	0	3	0	4.08746	7.16993	0
C4BPA	0	4	0	0	1.58496	2	0	1.58496	0	0	0	4.39232	0	0	0	0	0	0	0	6.52356	0	0	0	0	3	0
C4orf32	2.80735	2.58496	2.58496	3.58496	3.16993	2	3.58496	2	3	3.70044	2.32193	2	0	0	0	0	0	0	3	0	3.32193	0	0	4	1.58496	0
C4orf36	0	0	0	0	0	0	0	0	0	0	0	0	0	0	0	0	0	0	0	0	0	0	0	0	1	0
C4orf46	0	1.58496	0	0	0	0	1	0	0	1	0	0	0	0	0	0	0	0	0	0	0	0	0	0	0	0
C5orf17	0	2.58496	1.58496	0	1	0	0	0	0	0	0	0	0	0	0	0	0	0	1	1.58496	0	0	0	0	0	0
C5orf22	0	1.58496	0	0	0	3	4.70044	2.80735	2.32193	0	0	0	1	0	0	2.32193	0	0	0	0	2	0	0	0	1	0
C5orf24	0	0	0	1.58496	1.58496	0	1.58496	0	0	0	0	0	0	0	0	0	0	0	0	0	0	0	0	0	0	0
C5orf45	0	0	0	0	2	0	1	2.32193	0	0	2	0	0	0	0	0	0	0	0	0	1.58496	0	0	0	0	0
C5orf63	0	0	1.58496	0	0	0	2	0	0	0	0	1	0	0	0	0	0	0	0	0	0	0	0	1.58496	0	0
C5orf67	0	1	0	0	1.58496	0	0	0	0	0	0	0	0	0	0	1	0	0	0	0	0	0	0	0	0	0
C6orf106	0	0	0	1	2	2.58496	0	0	0	0	0	2.80735	0	0	0	0	0	0	0	0	0	1	0	3.16993	0	1.58496
C6orf120	1	3.90689	3	1	3.70044	3.80735	3.90689	2.32193	0	3	1.58496	2.32193	2.32193	0	0	1	0	0	0	2.32193	1	1.58496	1.58496	2.58496	1	1.58496
C6orf25	0	0	0	0	1.58496	0	0	0	0	0	0	0	0	0	0	0	0	0	0	0	0	0	0	0	0	0
C6orf89	0	3.80735	0	0	4.58496	0	5.80735	3.16993	0	0	1	0	0	0	0	0	0	0	0	0	0	0	0	0	0	2.80735
C7orf25	0	0	0	0	3.58496	0	0	3.70044	0	3.16993	0	3.16993	0	0	0	0	0	0	0	0	0	0	0	0	2.32193	2.32193
C7orf26	0	2.58496	3.32193	1.58496	4.90689	5.16993	4.75489	4	1	0	2	1.58496	0	0	0	0	0	0	1	0	3.16993	0	0	2	3	2.58496
C7orf43	0	0	0	0	2	0	0	0	1	0	0	0	0	0	0	3.58496	0	0	0	0	0	0	0	0	0	0
C7orf50	1	3.45943	0	4.08746	4.80735	2.80735	5.42626	3.90689	2	4.16993	3	5.2854	0	0	0	0	0	0	2.32193	0	0	0	0	0	3	2
C8orf34	0	0	0	0	2	0	2	0	0	0	0	0	0	0	1	0	0	0	0	0	0	0	0	0	0	0
C8orf74	0	0	0	0	0	0	0	0	0	0	0	0	0	0	0	0	0	0	0	0	1	0	0	0	0	0
C8orf82	0	4	3.70044	0	5.93074	4.58496	5.49185	4.16993	0	5.24793	4.64386	1	3	0	0	0	2.58496	0	2.58496	0	0	0	0	0	3.58496	2.32193
C9orf142	0	4.64386	2	3.80735	0	4.32193	2.58496	3.80735	0	1.58496	0	3.70044	2.80735	0	3	2.80735	0	0	0	0	0	0	1	0	2.80735	2.32193
C9orf40	0	0	0	2.58496	1.58496	2.32193	0	0	0	0	0	1	0	0	0	0	0	1	0	0	0	0	0	0	2.32193	0
C9orf62	0	0	0	0	2.32193	0	0	0	0	0	0	0	0	0	0	0	0	0	0	0	0	0	0	0	0	0
C9orf78	2.58496	3	3.16993	1	3.32193	2.32193	4.75489	3.32193	0	3.16993	3.16993	4	1.58496	0	2.58496	0	0	2.32193	0	2.58496	1.58496	0	0	0	3.16993	3.16993
CA1	0	1	3.90689	3.70044	3.90689	0	6.62936	4.52356	3.16993	1	0	0	0	3.70044	4.75489	3.80735	2	8.01681	7.85175	5.55459	2.32193	1	0	0	1.58496	5.58496
CA12	0	0	2	6	2.32193	4.58496	6.08746	1.58496	2	2.80735	4.24793	0	0	0	0	0	0	0	0	3.58496	2.80735	3.70044	0	0	4.24793	4.08746
CA2	0	3	3	1.58496	3	7.8009	7.65105	6.61471	7.09803	6.52356	7.76818	7.25739	2.32193	0	0	0	2	2.32193	3.80735	4	7.66534	1	0	0	8.49985	3.16993
CAAP1	0	0	0	3.58496	2.80735	0	0	3.70044	0	1.58496	1.58496	0	1	0	0	0	0	0	0	0	0	0	0	0	1	0
CAB39	6.32193	7.76155	5.93074	4.39232	7.59246	6.22882	8.03342	6.39232	6.14975	5.42626	5.90689	4	4.24793	4.24793	1	5.20945	6.10852	5.42626	4.75489	5.88264	6.10852	5.35755	5.80735	5.16993	6.76818	5.58496
CAB39L	2	4.9542	3.90689	2.58496	3.16993	2.32193	3.90689	4.58496	4.32193	0	4.16993	0	2.80735	0	0	2.58496	4.39232	1.58496	0	0	1	0	2.32193	1.58496	3.45943	3.16993
CABP1	2.32193	3.16993	0	0	3.16993	0	2.32193	0	0	1.58496	0	0	1.58496	3	0	0	0	0	2	0	0	1.58496	0	0	0	0
CABP2	0	5.16993	3.16993	1	2	0	2.58496	0	1.58496	3	0	0	0	0	0	0	0	0	0	0	0	0	1	1	3.80735	0
CABP5	2.58496	2.32193	0	2.32193	1.58496	2	3.32193	0	0	2.32193	0	0	2	0	0	0	1.58496	0	2.58496	0	2	0	0	0	3.32193	0
CACNA2D1	0	5.42626	0	0	3.58496	0	0	5	0	0	0	2.80735	0	0	0	0	0	0	0	0	0	4.39232	4.75489	0	0	0
CACNB4	0	0	0	0	0	1.58496	2	0	2.80735	0	0	0	4	0	0	0	1	0	0	1	1	1	0	0	0	0
CACYBP	5.83289	5.58496	5.58496	6.85798	5.88264	5.20945	6.89482	6.58496	5.55459	6.78136	4.90689	6.50779	5.16993	3.45943	5.24793	3.90689	3.90689	4.39232	4.70044	1.58496	5.24793	3.32193	4	2.80735	4.9542	4.58496
CAD	6.62936	0	0	6.90689	6.53916	8.18488	6.39232	6.52356	7.65821	0	5	7.14975	0	4.08746	5.55459	0	4.58496	0	0	0	0	5.2854	0	7.32193	6.75489	4.39232
CADM1	0	3.90689	0	0	3.16993	0	1.58496	0	0	0	0	0	0	0	1.58496	1.58496	0	0	3	0	1.58496	0	2.80735	0	0	4.58496
CALB1	0	0	0	0	1	0	1	0	0	0	0	0	0	0	0	0	0	0	0	0	0	0	0	0	0	0
CALCOCO1	0	1	0	0	2.32193	2	0	2.32193	0	2.80735	1	1	1.58496	0	2	0	0	0	0	0	0	0	0	0	0	0
CALCOCO2	2.58496	0	0	3	2.80735	2	3.45943	0	1.58496	1.58496	0	2.58496	0	3.90689	0	0	0	1.58496	0	1	4.16993	0	0	0	2	0
CALD1	0	0	0	0	5.83289	0	0	0	0	0	0	0	0	0	0	0	0	0	0	0	0	0	0	0	0	0
CALHM2	0	3.90689	1	0	3	0	0	0	0	0	2.32193	0	0	0	0	0	0	0	1	0	0	0	2.58496	0	3.80735	0
CALM1	8.21917	8.7039	7.25739	6.32193	6.59991	7.07682	7.67948	6.64386	8.40939	7.40088	7.33985	6.2854	6.2854	6.85798	9.18735	6.14975	7.46761	6.56986	6.96578	6.37504	7.53916	5.42626	6.9542	6.16993	6.67243	7.21917
CALM2	7	6.83289	5.80735	5.20945	6.22882	5.52356	6.02237	1	7.09803	4.80735	3.90689	0	4.16993	5.70044	7.40939	5.20945	5.93074	5.24793	4.85798	5.08746	6.26679	3.80735	5.24793	5.20945	4.75489	5.32193
CALM3	0	5.70044	3.70044	3.45943	2	4.90689	4.85798	4.24793	5.39232	4.58496	4.75489	3	3.16993	4.24793	5.42626	0	5.24793	1.58496	3.45943	3	4.75489	0	4	0	5.24793	5.16993
CALML4	0	0	0	0	0	4.32193	6.53916	4	0	4.90689	6.32193	0	0	0	0	0	0	0	0	2	0	0	0	0	2.32193	0
CALR	9.49185	10.363	9.57743	9.28309	8.6865	10.0028	9.89482	9.14466	8.87958	9.18239	8.98014	9.3837	9.18735	8.77479	8.85175	9.06609	8.36194	9.36413	9.40939	8.12412	8.80413	8.59246	8.5157	7.96578	9.33762	9.10852
CALU	8.3443	8.84549	6.55459	8.33092	8.21432	7.74147	8.43879	8.27146	8.00562	8.45943	9.01123	8.18488	7.63662	1.58496	7.96	6.67243	4.32193	7.53916	9.19476	7.06609	6.90689	7.98299	7.15987	6.47573	8.16993	7.52356
CAMK2A	0	2.80735	0	4.90689	2.80735	4.70044	3.90689	3.80735	2.80735	0	2.58496	2.80735	3.90689	0	0	1	0	0	1.58496	0	0	2.58496	1	0	3.16993	1.58496
CAMK2B	0	4	3.16993	5.58496	5.70044	4.70044	5	4.45943	1	1	4.75489	4.24793	3.70044	0	0	0	0	0	0	3	2.32193	4.64386	0	0	4.16993	1
CAMK2D	0	6.61471	5.2854	8.49586	6.20945	8.20945	7.7879	7.10852	6.9542	4.39232	7.07682	6.74147	7.01123	0	4.32193	3.16993	1	5.55459	5	0	3.32193	6.40939	4.52356	3.90689	5.93074	5.16993
CAMK2G	0	4.64386	0	5.35755	5.24793	6.06609	4.85798	4.52356	1.58496	0	4.85798	4.32193	3.16993	0	1	3.32193	0	0	2.32193	0	1.58496	1	2.80735	2.80735	3.58496	3.16993
CAMK2N1	0	0	0	0	0	0	0	0	0	0	0	0	0	0	0	0	1	0	0	0	0	0	0	0	1	0
CAMK4	0	0	0	0	3	0	0	0	0	0	0	0	0	0	0	0	0	0	0	0	0	0	0	0	0	0
CAMLG	1	3.58496	3.90689	3.32193	3.45943	3.70044	3.58496	2.80735	0	0	3	3.32193	0	0	0	0	0	0	0	0	0	2.32193	1.58496	3.16993	1.58496	1
CAMP	5.75489	3.80735	2	2.80735	2.32193	5.35755	2.80735	1	6.20945	0	0	2.32193	3.90689	6.55459	5.55459	4.08746	5.20945	5.20945	3.32193	0	5.12928	4.16993	4.90689	4	3.45943	0
CAND1	7.71425	9.86573	9.29462	9.75656	9.30606	9.69174	10.1984	9.29002	8.5812	8.92481	9.15228	7.71425	7.32193	0	6.84549	6.37504	7.14975	5.58496	5.08746	8.82018	9.63481	6.71425	6.61471	6.02237	9.28077	8.25267
CANT1	0	0	0	4.16993	3.16993	5	3	6.22882	4.9542	0	2.80735	3.16993	0	0	0	0	0	0	4.70044	0	0	0	0	0	0	4.58496
CANX	9.39232	10.6475	10.4707	9.41151	10.9701	10.2958	10.6211	10.3966	9.89178	10.1085	10.3174	10.5187	10.7582	9.24555	8.39232	9.48985	8.07146	9.52552	9.90689	9.76653	9.76653	9.15482	9.04985	8.41785	9.71768	10.268
CAP1	9.20212	11.1472	10.3174	8.84549	8.98014	9.62571	9.74651	9.68124	8.91588	8.75822	9.35975	9.08746	9.52748	6.2854	9.1472	9.12412	8.69	8.55842	7.76818	6.50779	7.73471	7.8392	7.91289	7.60733	9.3837	8.72451
CAPG	6.18982	8.53916	7.87036	5.90689	5.16993	7.11894	7.11894	7.79442	5.78136	7.02237	7.80735	6.42626	7.26679	4.24793	6.50779	7.78136	6.75489	6.79442	5.12928	5.75489	1	5.55459	3.16993	0	7.07682	6.42626
CAPN1	7.78136	9.10066	8.12928	8.21917	8.13443	8.82972	9.05799	8.20945	8.01681	7.97154	7.77479	7.96	7.48382	6.12928	5.9542	6.72792	7.24793	7.33985	7.26679	7.69349	7.15987	6.85798	6.20945	5.16993	8	7.37504
CAPN10	3	3.80735	0	0	2.32193	1	2.32193	0	0	4	0	4.24793	0	0	0	0	0	0	0	0	2	0	2.32193	0	1	2.32193
CAPN14	0	0	0	0	2.58496	2	0	0	0	0	0	0	1	0	1	0	0	0	0	0	0	0	0	0	0	0
CAPN2	6.83289	9	7.55459	7.59991	6.61471	7.97154	7.19967	6.97728	6.72792	7.05528	7.58496	5.83289	5.97728	0	6.26679	6.90689	5.88264	6.12928	6.85798	5.70044	6.47573	6	5.58496	0	8.03892	3.90689
CAPNS1	8.49185	10.1137	9.19967	9.64926	8.04439	9.90087	9.35975	8.89785	9.11374	8.69697	8.88874	8.75154	8.89785	5.67243	8.37504	7.98299	6.55459	8.14975	8.2384	8.30834	8.23362	7.7211	6.97728	5.72792	8.17991	7.59246
CAPNS2	0	4	0	3	2.32193	4.16993	3.58496	3.90689	4.39232	0	3.80735	3.16993	2.58496	2.32193	3.45943	2.80735	0	2.58496	0	2.58496	0	2.32193	2.32193	0	2.80735	0
CAPRIN1	5.20945	6.2854	5.49185	6.62936	8.01681	7.10852	7.43463	6.70044	5.67243	6.40939	5.90689	6.89482	6.78136	0	4.08746	5	4.58496	2.80735	5.16993	1	4	6.02237	3.80735	4.75489	5.58496	6.30378
CAPS2	0	0	0	0	1	0	0	0	0	0	0	2.32193	0	0	0	1.58496	0	0	1.58496	0	1.58496	0	0	0	0	0
CAPZA1	5.49185	7.73471	6.56986	6.12928	5.93074	6.30378	5.12928	5.72792	5.61471	5.39232	5.72792	6.20945	6.40939	3.80735	5.80735	5.88264	5.20945	6.26679	5.39232	1	4.64386	5.16993	4.90689	1.58496	6.12928	5.42626
CAPZA2	6	7.78136	6.14975	5.80735	4.90689	6.9542	8.47573	5.67243	5.75489	5.78136	5.75489	6.35755	6.67243	2.80735	4.90689	5.93074	5.04439	5.16993	4.32193	0	3.45943	3.90689	4.85798	4.75489	7.18982	5.20945
CAPZB	7.53138	8.73471	8.04439	7.69349	5.52356	8.51964	6.76818	7.07682	8.06609	5.64386	7.03342	7.40088	7.62936	7.25739	7.45943	7.17991	7.45943	7.72792	5.24793	1	6.49185	6.32193	6.79442	5.97728	8.29002	6.70044
CARD16	0	4.85798	4.45943	0	0	2.32193	0	1	1.58496	0	0	3	0	0	0	3.45943	0	0	0	0	0	0	0	0	0	0
CARD8	0	2.32193	0	1	0	0	0	0	0	0	0	0	0	0	0	0	1.58496	0	0	0	0	0	0	0	0	0
CARF	0	0	0	0	2.32193	3	0	0	1	0	0	0	0	0	0	0	0	0	0	0	0	0	1	0	3.58496	0
CARHSP1	0	3.70044	0	3	4.70044	2.80735	5.12928	2	0	1	3.90689	0	1	0	3.32193	3.45943	0	0	3.16993	4.9542	1.58496	3.80735	1.58496	0	1	0
CARMIL1	3.58496	0	0	5	2.32193	5.90689	8.58496	5.70044	4.90689	0	0	4.75489	3.32193	0	0	0	0	0	0	0	5	0	0	0	4.32193	0
CARS	5.04439	5.90689	4.58496	6.02237	6.04439	6.98868	6.02237	3.58496	2.58496	3.16993	3.32193	5	4.32193	0	1.58496	0	3.32193	0	4.80735	4.64386	0	0	2.58496	0	5.20945	5.85798
CARS2	2.32193	2.80735	3.58496	5.49185	4.75489	5.9542	5.72792	4.45943	4.85798	3.70044	5.39232	5.16993	3	0	0	3	0	2.58496	5.49185	3.90689	0	0	0	2.80735	3.70044	0
CASC4	0	7.03342	6.16993	4.58496	7.70736	5	7.67948	6.98868	2.80735	3.70044	4.70044	0	4.90689	0	0	3.16993	3.32193	0	6.65821	5.67243	2.80735	5.80735	0	3	6.45943	5.9542
CASP1	0	9.52748	7.73471	0	3.58496	4.24793	4.58496	5.83289	6.20945	0	3.45943	6.75489	5.42626	0	5.83289	7.01123	6.12928	7.19967	0	0	3.32193	4	3.90689	0	4.90689	6.72792
CASP2	0	0	1	0	2.58496	0	0	0	0	0	3.45943	0	0	1.58496	2	0	0	0	0	0	3.45943	0	2.32193	0	0	0
CASP3	0	4.52356	2	4.32193	3.45943	5.67243	3.16993	4.32193	2.32193	0	4.75489	3.58496	3	0	3.80735	2.58496	2.32193	0	0	0	1.58496	0	0	0	2.80735	2
CASP4	0	6.37504	4.16993	0	3.90689	4.32193	5.67243	4.80735	1	1	0	2	1	0	2.32193	5.97728	3	3.45943	1	0	2.32193	0	2.32193	1	3.80735	0
CASP5	1	2.32193	0	0	3.58496	0	0	2.32193	1	0	0	0	0	1	0	3.80735	0	0	0	0	0	0	0	0	0	1
CASP8	4.90689	4.58496	0	3	3.45943	0	4.58496	5.9542	5.16993	4.45943	0	5.2854	0	0	1	0	0	1.58496	3.45943	0	2.80735	0	0	0	0	4.16993
CAST	8.58496	11.0848	10.1984	8.50383	9.72281	9.48985	10.8313	8.8009	6.10852	9.75489	10.1573	9.46352	9.56224	5.70044	8.75489	8.64386	6.59991	7.35755	8.45943	10.0485	8.14975	8.85798	7.54689	6.14975	8.84235	9.20457
CAT	5.64386	8.60733	7.45943	4.58496	9.13699	7.03342	7.10852	8.0607	6	6.24793	7.40088	7.25739	7.40939	5.80735	6.78136	6.74147	6.02237	6.71425	7.67243	4.90689	2.80735	5.55459	5.04439	2.58496	6.52356	8.32193
CATSPERD	0	0	0	0	2.58496	0	0	0	0	0	0	0	0	0	0	0	0	0	0	0	0	0	0	0	0	0
CBR1	4.75489	7.40939	5.88264	6.16993	8.86419	8.04439	6.71425	5.35755	4.70044	3.80735	6.33985	6.02237	5.78136	1	5.2854	5.9542	5.32193	4.45943	3	3.16993	8.23362	6.04439	3.70044	3	6.16993	6.37504
CBR3	3	4.64386	3.58496	4.32193	6.67243	5.80735	4.24793	3	2.58496	1.58496	4	2.58496	3.32193	0	4	3	3.32193	3.16993	0	0	6.20945	3.45943	2	0	3	4.08746
CBR4	0	0	0	0	3	2	1.58496	0	0	0	1.58496	1.58496	0	0	0	0	0	0	0	0	0	0	0	0	0	0
CBS	0	0	1.58496	5.08746	4	0	0	0	0	0	0	0	0	0	0	0	0	0	0	0	0	0	0	0	0	2.80735
CBWD1	0	0	0	0	2	1	4.32193	0	2.80735	0	1	1.58496	0	0	0	0	0	2	0	0	0	0	0	0	0	0
CBX1	0	6.78136	6.26679	4.58496	5.16993	5.04439	5.24793	5.61471	0	5.9542	6.18982	5.49185	5.16993	5.88264	0	4.45943	4.39232	4.80735	4.45943	4.39232	0	6.16993	5.83289	0	4.85798	5.16993
CBX3	6.52356	7.08746	6.64386	6.49185	6.02237	6.24793	5.97728	6.78136	4.39232	7.70736	6.08746	6.24793	5.32193	6.06609	5.32193	5.9542	4.08746	5.12928	5.08746	5.52356	5.16993	6.22882	6.08746	3.58496	6.04439	6.40939
CBX5	0	4.80735	5.16993	5.32193	4.16993	2.80735	5.42626	5.61471	0	6.22882	5.04439	4.32193	3.58496	0	3.70044	2	0	3	3	1.58496	1	5.67243	3.58496	1.58496	4.45943	4.24793
CBX8	0	0	0	3.16993	2.32193	0	0	0	0	0	0	0	0	0	0	0	0	0	0	0	0	0	0	0	0	0
CCAR1	4.32193	6.2854	0	5.55459	4.58496	6.33985	6.45943	7.2854	5.80735	5.85798	5.93074	5.85798	2.58496	0	5.90689	4.9542	2.32193	3	2.32193	0	6.04439	6.64386	5.97728	6	5.32193	4.9542
CCAR2	6.67243	9.32418	8.08746	9.07414	8.19476	8.90087	9.224	9.89178	8.27612	9.44501	9.28771	8.99435	9.09276	2	6	7.40939	6.52356	4.45943	8.10852	6.50779	6.78136	8.20457	6.06609	8.32193	7.91289	7.93074
CCBL1	0	2.80735	0	0	1	0	0	0	0	0	1	0	0	0	0	0	0	0	0	0	0	0	0	0	0	0
CCDC102B	1	2.58496	0	0	1	0	1.58496	0	0	1.58496	0	0	0	0	0	0	0	0	0	1	0	0	0	0	0	2
CCDC115	0	0	0	3.80735	1.58496	0	3.45943	4.16993	0	0	0	0	0	0	0	0	0	0	0	0	0	0	0	0	0	0
CCDC117	0	0	0	2.58496	0	0	0	0	0	1	0	0	0	0	0	0	0	0	0	1	0	0	0	0	0	0
CCDC12	0	1	0	2	2.58496	0	2	4.24793	0	0	1	1	1	0	0	0	0	0	0	2	0	0	0	0	0	2.32193
CCDC124	0	2.80735	2.58496	5.52356	4.45943	3.45943	6.24793	4.16993	0	3.90689	4.70044	4.70044	4.80735	0	0	0	0	0	2	2	0	1.58496	0	0	3.58496	4
CCDC126	0	0	0	2	4.70044	3.45943	5.42626	2	2.58496	1.58496	1	0	1.58496	0	0	0	0	0	1.58496	2.32193	2.80735	0	2	0	2.58496	2
CCDC127	0	2.32193	0	0	2.32193	0	2.80735	0	0	0	0	1.58496	0	0	0	0	0	0	0	0	0	0	0	0	0	0
CCDC134	3.16993	0	0	2.32193	3.16993	2	1.58496	0	1	0	3	1	1.58496	0	0	0	0	0	1.58496	0	1.58496	1.58496	0	0	3	2.32193
CCDC158	0	0	0	0	3.58496	0	0	0	0	0	3.32193	0	0	0	0	0	0	0	0	0	0	0	0	0	0	0
CCDC159	0	0	0	0	0	0	0	1.58496	0	0	0	0	0	0	0	0	0	0	0	0	2	0	3.45943	0	0	0
CCDC174	0	0	0	0	2.32193	1	0	2.58496	0	0	3.58496	0	0	0	0	0	0	0	0	1.58496	0	0	0	0	0	0
CCDC25	0	3.90689	2.32193	4.58496	3.58496	5.55459	5.55459	4.70044	0	6.26679	6.32193	4.45943	4	0	0	0	1	2.58496	0	1	0	0	0	4.9542	4.58496	3.70044
CCDC47	5.20945	5.80735	4.52356	6.12928	6.45943	6.22882	6.26679	6.80735	5.42626	5.04439	6.06609	6.33985	5	0	3.58496	3.70044	4.32193	4.45943	6.56986	0	5.42626	5.52356	5.75489	5.61471	5.64386	5.78136
CCDC51	2	4.70044	0	5.20945	5.39232	4	5.35755	5.24793	0	3.45943	4	5.58496	4.52356	0	0	0	0	0	1.58496	1	4.08746	2	0	3.32193	2	4.08746
CCDC53	1.58496	4.9542	3.45943	3.45943	0	3.58496	4.08746	2.58496	0	0	2.58496	0	2.58496	0	0	0	2.80735	0	2	0	0	0	0	1.58496	3.45943	1
CCDC58	2.58496	3.45943	3.16993	3.70044	3.80735	4	2.80735	3.16993	2.32193	4.16993	4.52356	3.58496	3.45943	0	2	0	0	1.58496	1.58496	0	3.16993	3.70044	2.32193	3.45943	3.90689	3.58496
CCDC6	3.80735	4.64386	2.58496	5.78136	3.45943	4.52356	6.6865	4.9542	4.58496	5.49185	4.85798	4.85798	5.35755	0	2	2.58496	2.32193	0	0	0	0	0	0	0	4.24793	3.45943
CCDC61	0	0	0	0	1	0	0	1	0	0	0	0	0	0	0	0	0	0	0	0	0	0	0	0	0	0
CCDC73	0	0	0	0	2.58496	0	0	0	0	0	0	0	0	0	0	0	0	0	0	0	0	0	0	0	1	0
CCDC80	0	0	0	0	3.45943	2	0	0	0	0	0	0	0	0	0	0	0	0	0	0	0	0	0	0	0	0
CCDC86	0	0	0	0	2.32193	0	3	0	0	2.32193	1	2.58496	0	0	0	0	0	0	0	1.58496	0	0	0	2.80735	1	0
CCDC9	0	0	0	0	2.58496	0	0	2.32193	0	0	0	0	0	0	0	0	0	0	0	2	0	0	0	0	0	0
CCDC90B	0	5.32193	1	0	4.32193	0	3.80735	4.32193	0	2	5.35755	2.80735	3.16993	0	0	0	0	3.32193	4.58496	0	0	2	1.58496	0	5.61471	5.90689
CCDC92	0	2.32193	0	1.58496	2	2	2.32193	0	0	0	0	0	0	1.58496	0	0	0	0	0	0	0	0	0	2	0	0
CCDC97	0	0	0	0	2	3.58496	3.90689	3.58496	0	0	3	4	0	0	0	0	0	0	0	0	0	3.45943	0	0	0	1.58496
CCHCR1	3.70044	0	0	0	3.90689	0	0	1.58496	0	0	0	1	0	0	0	0	0	0	0	0	0	0	0	0	0	0
CCL18	0	0	0	0	1	0	0	2	0	1	0	0	0	0	0	0	0	0	0	0	0	0	0	0	0	0
CCL26	0	0	0	0	0	0	0	0	0	0	0	0	0	0	0	0	0	0	0	0	0	0	0	0	0	0
CCL4	0	0	0	0	1	0	0	1	0	0	0	0	0	0	0	0	0	0	1.58496	0	0	0	0	0	0	0
CCL4L1	0	0	0	0	1	0	1	2.58496	0	0	0	0	0	0	0	0	0	1.58496	0	0	1	0	0	1	0	0
CCNA2	0	0	0	2.80735	2.58496	0	0	0	0	0	1	0	0	0	0	0	0	0	0	0	0	0	0	0	0	0
CCNB1	0	0	0	3.45943	4.9542	0	5.52356	4.45943	0	0	2	4.64386	3	0	0	0	0	0	0	0	0	0	2.80735	0	2.58496	1
CCNC	0	1	0	0	2.32193	2	2.58496	3.70044	0	0	0	0	0	0	0	0	0	0	0	0	0	0	0	0	0	0
CCND3	2.58496	0	0	1	0	2.32193	0	0	0	0	0	0	0	0	0	1	0	0	0	0	2.32193	0	0	0	0	0
CCNDBP1	0	2	0	0	1	0	3.80735	3.58496	0	0	3	2.58496	1	0	1	0	0	0	0	1	0	0	0	0	0	0
CCNK	0	5.85798	3.58496	5.61471	5.49185	5.90689	6.50779	5.83289	3	5.08746	5.64386	4.85798	3	0	0	3.16993	3.58496	2	3.90689	0	2	4.70044	4.85798	4.58496	4.08746	4.70044
CCNY	0	4.9542	4	4	4.32193	4.52356	4.70044	3.45943	3.90689	3	1.58496	0	4.16993	1	0	1	1.58496	2.32193	3.45943	2.32193	2.32193	2.80735	2.58496	0	2.80735	1
CCNYL1	0	3.45943	0	0	3.80735	2.80735	1	0	0	0	0	0	0	0	0	0	0	0	0	0	0	0	0	0	1	1
CCR3	0	0	0	0	0	0	0	0	0	0	0	0	0	0	0	0	0	0	0	0	0	0	0	0	0	0
CCS	0	5.32193	3.16993	2.80735	2	4.45943	4.32193	4	3.90689	3.58496	4.08746	3.70044	4.16993	2.58496	1	2	1.58496	2.80735	3	2.32193	1.58496	2	0	0	4.52356	4.58496
CCT2	9.30834	9.78463	9.07682	10.29	10.643	11.258	10.3072	9.60548	9.71081	10.2432	9.7039	10.352	9.96723	5.24793	8.29921	7.80735	7.74147	7.74819	8.52356	8.10852	6.85798	7.67948	8.13955	9.17493	9.95128	9.35315
CCT3	8.01681	9.4818	8.29462	9.91737	10.1241	9.8009	10.1124	9.03892	8.73132	9.04166	8.90388	9.80413	9.21189	4	7.46761	7.07682	7.44294	6.91886	8.01681	7.59246	6.35755	6.45943	6.33985	8.59991	9.54496	8.14466
CCT4	7.5157	8.20457	7.90087	8.64746	8.56605	8.94837	8.8392	8.03892	7.97728	8.19967	8.15987	8.71081	8.43463	2.80735	6.67243	5.45943	6.26679	5.90689	6.44294	6.35755	6.53916	5.08746	6.20945	7.20945	8.53138	6.75489
CCT5	9.01123	8.70736	8.20457	9.7364	9.53138	9.43671	9.88417	8.90087	9.02791	8.89482	8.17493	9.96	9.14211	4.70044	8.26679	7.55459	7.3837	7.94837	7.04439	6.78136	5.64386	7.27612	7.45943	8.83289	8.69349	8.09276
CCT6A	8.60733	8.50383	7.46761	8.43463	8.68299	8.633	8.28077	7.82018	8.14466	7.55459	7.46761	8.85487	8.03892	6.08746	6.53916	6.52356	6.67243	6.6865	6.16993	5.20945	6.45943	5.9542	7.05528	8.01123	8.10852	7.35755
CCT6B	1	3.45943	0	4.90689	3.90689	4.75489	4.39232	5.64386	6.59991	3.16993	2	6.08746	4.9542	3.16993	2.32193	3.70044	3.90689	3.80735	1.58496	0	4.24793	2.58496	3.16993	3.32193	4.45943	3.70044
CCT7	8.34873	8.97728	8.76487	9.47573	9.8392	9.70044	9.92184	8.52748	8.59991	9.13955	9.05528	9.45327	8.90087	4.08746	6.79442	7.02237	6.85798	6.02237	7.46761	6.83289	5.93074	6.30378	6.89482	8.37069	9.17243	8.25739
CCT8	9.40727	10.1163	9.59246	10.4252	10.9218	10.4645	10.8471	9.61102	9.64746	10.2143	9.67419	10.1408	9.1267	6.37504	8.10852	7.11894	7.55459	7.24793	7.24793	8.43879	7.06609	6.75489	7.69349	8.48784	9.93074	9.04985
CD14	4.9542	9.49386	8.62205	4.75489	5.55459	7.43463	7.67948	7.8392	5.75489	5.93074	6.14975	4.90689	5.72792	2.32193	2	6.97728	7.78136	6.70044	4.64386	5.9542	0	5.2854	3.90689	0	8.16491	7.04439
CD160	0	1.58496	0	0	2	0	0	0	0	0	0	0	0	0	0	0	0	0	1	0	0	0	0	1	0	0
CD1E	0	1	0	0	1	0	0	0	0	0	0	0	0	0	0	0	0	0	0	0	0	0	0	0	0	0
CD24	1.58496	0	0	0	0	0	1	0	0	0	0	0	0	0	0	1	0	0	1	0	0	0	0	0	0	0
CD2AP	3.58496	6.22882	4.32193	5.32193	6.10852	5.93074	6.96578	5.9542	4.32193	6.74147	6.02237	5.42626	6.14975	0	4.45943	4.75489	4	2.58496	5.24793	4.24793	3.80735	5.80735	3.32193	4.90689	5.58496	4.9542
CD2BP2	0	2.80735	2.32193	2	3.32193	3.70044	3.58496	4	1	4.16993	4	1.58496	0	0	2.80735	0	0	2.32193	3.70044	0	0	2.58496	0	0	2.80735	2.58496
CD320	0	0	0	0	0	3.16993	3.58496	0	0	0	1.58496	0	0	0	0	0	0	0	0	0	0	0	0	0	4	3.16993
CD36	0	3.70044	0	0	0	0	0	0	0	0	0	0	0	0	1	2	3	4	0	0	0	0	0	0	1	2.32193
CD38	1	6.06609	6.62936	1	1.58496	0	0	3.45943	0	5.70044	0	0	0	0	2.58496	0	3.45943	4	0	0	0	0	0	0	2.32193	1
CD3EAP	0	3.70044	1.58496	3.70044	5.49185	3.32193	5.08746	4.52356	0	5.97728	5.24793	4.85798	3.45943	0	0	0	0	0	0	2	0	0	0	2.58496	4.70044	5.24793
CD40	0	4.80735	5	0	1	3.90689	0	3.90689	0	0	0	0	0	0	0	0	0	2.58496	0	0	0	2.32193	0	0	2	0
CD44	6.16993	8.97441	8.5812	6.40939	7.87652	7.06609	8.67948	9.10852	5.85798	7.2854	7.10852	7.53138	9.4818	3.16993	5.75489	6	5.42626	6.80735	4.90689	3.58496	4.45943	5.80735	6.32193	9.783	6.50779	7.35755
CD46	3	2.58496	4.16993	4.39232	3.90689	4.85798	5.85798	5.35755	3.58496	5.45943	3	5.39232	5.55459	0	0	0	0	0	3.80735	4.64386	1	1	0	1.58496	2	3
CD55	4.45943	2	5.75489	9.00282	4.9542	3.90689	5.16993	1.58496	4.32193	5.2854	5.08746	10.6294	5.72792	0	0	0	0	0	3.80735	2	0	0	0	0	0	4.85798
CD59	6.70044	5.85798	6.20945	3.32193	8.30378	7.21917	7.36632	6.45943	4.58496	7.25739	7.05528	5.58496	5.24793	5.2854	1.58496	4.39232	0	4.64386	5.90689	6.35755	5.16993	5.72792	3.90689	3.32193	3	6.58496
CD6	0	3	5.04439	0	0	0	0	0	0	1.58496	0	0	0	0	0	0	0	0	0	0	0	0	0	0	0	0
CD97	5.12928	6.91886	5.35755	0	3.70044	4.85798	6.44294	4.64386	4.70044	4.64386	3.58496	4.16993	4.75489	4.32193	4.39232	4.70044	4.52356	6.08746	3.70044	4.24793	3.45943	4.45943	4.75489	4.45943	3.80735	5.61471
CD99	1.58496	6.56986	2.80735	4.64386	1.58496	4.16993	6.16993	5.72792	0	0	5.35755	3.45943	3.58496	0	0	1.58496	0	0	1.58496	1.58496	0	0	5	0	3.32193	2
CDC14A	0	0	0	1.58496	3.90689	0	0	0	0	0	0	0	0	0	3	0	0	3.45943	0	0	0	0	0	0	0	0
CDC2	3.58496	0	0	0	4.24793	0	4.80735	3	1.58496	0	0	4.08746	2.80735	0	0	0	0	0	0	0	0	0	2.32193	3.70044	4.16993	3.58496
CDC23	0	5.67243	0	2.58496	4.08746	4.08746	4.16993	4.90689	0	0	0	5.12928	1.58496	0	0	0	2	0	4.16993	0	0	3	2.58496	5.39232	3.80735	0
CDC26	0	0	1	0	3	0	2	0	0	0	0	1.58496	0	0	0	1.58496	0	1	0	0	0	2	0	2	0	0
CDC27	0	0	0	1.58496	5.08746	0	1	4.52356	2.80735	0	0	2	0	0	0	0	0	0	0	0	0	0	0	0	3.58496	2.32193
CDC37	7.18982	8.44294	6.72792	8.94837	7.71425	8.77149	9.04985	7.16993	8.88264	7.41785	7.19967	8.84549	8.37938	6.71425	4.58496	6.55459	5.64386	6.97728	5.2854	4.45943	6.56986	5.55459	6.14975	6.45943	6.65821	7.10852
CDC42	4.85798	7.96	7.52356	6.94251	6.82018	7.18982	7.2854	6.37504	5.72792	6.72792	7.44294	7.05528	7.3837	0	5.55459	6.67243	5.97728	5.93074	5.72792	5.32193	0	6.06609	3.16993	2.80735	7.08746	6.14975
CDC42BPB	0	3.70044	0	0	4.9542	2.58496	5.42626	0	0	3	0	0	0	0	0	0	0	0	0	0	0	0	0	0	3.32193	0
CDC42EP4	2	1	0	4.70044	5.78136	2.58496	5.42626	3.80735	0	5.83289	5.67243	5.72792	1	0	0	0	0	0	0	2	0	1	0	0	0	3.70044
CDC42SE1	0	1	1.58496	1.58496	0	0	0	0	0	1	0	0	0	0	0	0	0	0	0	0	0	0	0	0	0	0
CDC45	0	0	2.32193	0	1.58496	0	0	0	0	0	0	0	0	0	0	0	0	0	0	0	0	2.58496	0	0	0	0
CDC5L	0	7.02237	5.35755	6.08746	6.56986	5.49185	6.2854	6.06609	5.08746	5.24793	5.75489	5.78136	5.9542	0	5.52356	4.16993	3.70044	3.70044	5.9542	3.16993	4.52356	5.67243	5.04439	0	5.20945	5.08746
CDC73	0	3.80735	2.32193	4.52356	4	3	4.32193	5.70044	0	0	4.52356	4.16993	3.16993	0	3.58496	0	0	0	3.45943	0	0	0	0	0	3.90689	3.45943
CDCA2	0	0	0	0	3.80735	0	1.58496	0	0	0	0	3.32193	4.24793	0	0	5	0	3.45943	0	0	0	0	0	0	0	0
CDCA3	0	0	0	0	2	0	1.58496	0	0	0	0	0	0	0	0	0	0	0	0	0	0	0	0	0	2.32193	2.80735
CDCA5	0	0	0	0	1.58496	0	0	0	0	0	0	0	0	0	0	0	0	0	0	0	0	0	1.58496	0	2.80735	0
CDCA8	0	0	2.80735	0	1.58496	0	2.32193	0	0	0	0	0	0	0	0	0	0	0	0	0	0	0	0	0	0	1.58496
CDCP2	0	0	0	0	1.58496	0	0	0	0	0	0	2.80735	0	0	0	0	1	0	0	0	0	0	0	0	1.58496	0
CDH1	0	0	0	4.08746	4.16993	6.85798	8.49586	6.79442	5.58496	7.8009	7.53138	6.65821	5.49185	0	0	0	0	0	0	6.65821	0	6.04439	6.32193	4.70044	2.80735	7.21917
CDH11	0	0	0	2	1.58496	4.52356	1.58496	0	0	0	2.58496	1	0	0	0	2	0	0	0	0	0	0	0	4.32193	1	0
CDH13	0	0	0	0	1	0	2.80735	0	1	0	0	0	0	0	0	0	0	0	0	0	0	0	0	0	0	0
CDH17	4.45943	3.16993	0	0	6.64386	6.6865	8.89178	5.9542	0	5.97728	6.72792	4.52356	2.80735	0	0	0	0	0	0	8.08746	0	0	6.50779	5.64386	0	8.16491
CDH3	0	1	3	2.80735	2.32193	2	4.64386	0	4.39232	4.70044	0	1	3.80735	0	0	0	0	0	5.49185	3.70044	0	3.16993	0	2.80735	0	3.16993
CDH5	0	2.58496	0	3.16993	1	0	0	2.80735	0	0	3.32193	0	0	0	0	0	0	0	0	0	0	0	0	0	0	0
CDH7	0	0	0	0	3.16993	0	0	2.58496	0	0	0	1.58496	0	0	0	0	0	0	0	0	0	0	0	0	0	0
CDHR1	0	0	0	0	0	0	0	3	1	0	0	0	0	0	0	0	0	0	0	0	0	0	0	0	0	3.80735
CDHR5	0	0	0	0	3.70044	0	0	0	0	0	0	0	0	0	0	0	0	0	0	0	0	0	0	0	0	4.52356
CDIP1	0	0	0	0	1.58496	0	0	0	0	0	0	0	0	0	0	0	0	0	0	0	0	0	0	0	0	0
CDIPT	1	5.24793	4.08746	4.32193	2.32193	5.16993	4.70044	5.64386	5.24793	2.32193	4.64386	2.32193	2.80735	2.80735	0	3	4.24793	3.45943	1.58496	3.32193	3.16993	0	0	1.58496	4.58496	4.45943
CDK1	6.12928	0	0	8.03892	6.50779	5.20945	7.56224	6.30378	3	4.85798	4.64386	7.8009	5.45943	0	3.70044	0	0	0	0	0	4.39232	3.80735	5.12928	6.04439	5.80735	5.49185
CDK10	0	0	0	0	2.58496	2.58496	2.32193	0	0	0	0	0	0	0	0	0	0	2.32193	0	0	0	1	0	0	0	1
CDK11A	0	5.88264	2.58496	5.45943	4	5.93074	5.12928	2.80735	4.45943	0	3.80735	5.16993	3.32193	0	2	0	1.58496	4.45943	4.45943	0	5.49185	4.80735	4.24793	5.20945	4.9542	4.32193
CDK11B	0	2.80735	2.80735	4.24793	3.80735	0	5.42626	3	3	0	4.75489	4.85798	3.45943	0	0	0	0	3.16993	4.9542	0	3.45943	4.58496	3.90689	5.80735	5.16993	3
CDK12	0	0	0	0	3.90689	4.08746	4.08746	3.90689	1	0	0	2.32193	0	0	0	0	0	3.70044	0	0	0	0	0	1.58496	1.58496	0
CDK13	4.39232	0	0	3.16993	3.32193	5.80735	5.16993	0	0	0	0	2.80735	1.58496	0	0	0	0	0	0	0	0	0	0	0	3.16993	0
CDK18	1.58496	3.45943	0	0	2.32193	1.58496	3.32193	3.32193	0	1.58496	0	1	2.58496	0	0	0	0	0	0	0	0	0	0	0	0	0
CDK2	3.16993	4.32193	0	5.78136	2.80735	3.58496	5.45943	4.64386	0	4.70044	3.45943	5.75489	2.58496	0	0	0	0	0	2.80735	0	2.80735	0	0	2.80735	4.52356	3.80735
CDK2AP1	0	0	0	3.16993	1	1	1.58496	2	2	0	2.58496	3.70044	1.58496	0	0	0	0	0	0	0	0	0	0	0	2	1
CDK4	1	0	0	5.20945	3.90689	2.80735	5.97728	0	2.80735	2	1	3.32193	3.80735	0	0	2	0	0	0	0	0	0	2	0	2.32193	0
CDK5RAP3	5.35755	7.25739	6.78136	6.85798	6.67243	6.98868	8.24793	7.82018	7.2384	7.40939	7.62205	6.37504	6.49185	3.32193	3	4.75489	4.08746	3.90689	6.06609	5.32193	5.72792	5.80735	4.45943	5.04439	6.16993	6.18982
CDK6	3.58496	3.45943	2.80735	1	3.70044	3.58496	8.45121	4.24793	0	3	3.32193	4.70044	0	0	0	0	0	0	0	0	0	0	0	2	4.24793	4.45943
CDK7	0	4.64386	3.70044	0	5.49185	0	5.97728	4.58496	0	0	1.58496	3	3.45943	0	0	0	0	0	3.16993	0	0	0	2.80735	2.80735	3.16993	0
CDK9	0	2.32193	4.08746	1.58496	4.32193	3.70044	5.2854	4.75489	0	3.45943	2.58496	4.75489	2.80735	0	0	0	2.80735	0	0	0	0	0	0	3.16993	4	3.16993
CDKN1C	0	2.32193	0	0	0	0	0	0	0	0	0	0	0	0	0	2	0	0	0	1	0	0	0	0	0	0
CDKN2AIP	2	4.16993	0	4.75489	3	4.75489	4.58496	5.16993	3.70044	0	4.32193	0	0	0	1.58496	0	0	0	0	0	0	2.80735	4.08746	2	2.32193	1
CDON	0	0	0	1.58496	2	0	0	0	0	0	0	0	0	0	0	0	0	0	0	0	0	0	0	0	0	0
CDR2	0	0	0	0	0	0	0	0	0	0	0	1.58496	0	0	0	0	0	0	0	0	0	0	0	0	0	0
CDS1	1.58496	1	0	2	2.80735	3.80735	3.70044	1.58496	3	2.58496	4.16993	2.58496	3	0	0	0	0	0	4.08746	3.80735	2.80735	0	1.58496	0	2.32193	1.58496
CDS2	2	4.70044	4.24793	2.58496	2.58496	3.45943	3.45943	3.45943	2.32193	3.45943	3.16993	2.58496	2	0	0	0	1	1.58496	3.90689	4.08746	0	0	1.58496	1	2	2.32193
CDV3	3.16993	6.90689	6.26679	3.90689	5.49185	5.42626	7.7211	4.32193	2.80735	3.16993	4.90689	5	5.61471	0	3	6.61471	3.58496	4.75489	3.70044	4.58496	2.58496	5.35755	2	3.45943	5.16993	0
CDY1	0	1	0	0	3	0	0	0	0	0	0	0	0	0	0	0	0	0	1	0	4.24793	0	2	0	0	0
CDY2A	0	2	0	0	2.58496	0	0	0	0	0	0	0	0	0	0	0	0	0	0	0	4.39232	0	2.58496	0	0	0
CDYL	0	1.58496	1.58496	0	5.70044	2.58496	2.58496	3.45943	0	0	0	1.58496	0	0	0	0	0	3.45943	2.32193	0	2.32193	1.58496	3	0	0	0
CEACAM19	0	0	0	0	0	1.58496	1.58496	0	0	0	0	2	0	0	0	0	0	0	0	0	0	0	0	0	0	0
CEACAM21	0	0	0	0	0	0	0	0	0	0	0	0	0	0	0	0	0	0	0	0	0	0	0	0	0	0
CEACAM5	8.73809	0	4.08746	4.52356	3	8.01123	9.31061	8.92481	6.90689	6.79442	9.22882	4.08746	8.09276	6.10852	3.58496	6.06609	5.45943	2.80735	7.15987	7.49985	8.30378	5.85798	2.58496	5.78136	0	9.03892
CEACAM6	7.16993	4.39232	0	0	4.64386	5.49185	8.29462	7.12928	5.64386	5.61471	7.2854	4.08746	6.6865	6.74147	2.32193	4.75489	3.58496	3.70044	4.90689	6.44294	6.98868	3.80735	4.08746	4.70044	1	5.72792
CEACAM8	6.84549	3.58496	0	1	2.58496	4.9542	6.10852	4.24793	5.80735	2.58496	5.35755	1.58496	4.45943	7.31288	5.16993	4.16993	4.24793	5.04439	4.9542	4.08746	6.24793	1	4.24793	0	2.58496	5.12928
CEBPB	0	5.9542	4.70044	0	4.58496	0	2	3	0	0	2.32193	0	0	0	2.32193	2.58496	0	0	4.45943	0	0	1	0	0	0	0
CEBPG	0	0	0	0	1.58496	0	2.32193	0	0	1	2.58496	0	0	0	0	0	0	0	0	0	0	0	0	0	0	0
CEBPZ	4.58496	3	0	0	6.12928	2.80735	5.16993	4.58496	0	0	4.24793	3.80735	0	0	0	0	1	0	3.90689	2.32193	0	0	3.45943	0	0	3.70044
CECR5	1	4.90689	3.90689	3.16993	4.70044	5.75489	5.12928	4.16993	5.20945	3.58496	6.80735	4.39232	4	0	0	3.45943	3.58496	4.08746	2.58496	0	2.32193	3.70044	1.58496	3	4.08746	4.32193
CELF1	0	0	0	2.58496	3.80735	5.42626	4.90689	4	0	0	1.58496	1	2.80735	0	2	0	0	0	0	0	0	1	0	4.80735	0	4.75489
CENPA	0	0	0	0	0	0	0	0	0	0	0	0	0	0	0	0	0	0	0	0	0	0	0	0	1	0
CENPC	0	2	0	0	3.32193	3.45943	3.16993	0	0	0	0	0	0	0	3.80735	0	0	0	0	0	0	0	0	0	0	0
CENPN	0	2.80735	0	0	2.58496	0	0	0	0	0	0	0	2.32193	0	0	0	0	0	0	0	0	0	0	0	0	0
CENPU	0	0	0	0	1.58496	2	0	0	0	0	0	0	0	0	0	0	0	0	0	0	0	0	0	2.32193	0	0
CENPV	0	0	0	2.58496	5.93074	4.16993	6.2854	5.80735	0	4.16993	5.52356	5.80735	5.93074	0	0	0	0	0	0	5.16993	0	2.58496	0	3.32193	7.01123	1
CEP104	1	0	0	0	4.16993	0	3.58496	4.80735	0	0	1.58496	3.45943	0	0	3	0	0	2	0	0	0	0	3	0	0	0
CEP131	0	0	0	0	2.58496	0	0	5	0	0	5.20945	0	0	0	0	0	0	0	0	0	4.45943	0	0	0	0	5.08746
CEP170P1	0	0	0	0	1	0	0	1	0	0	0	0	0	0	1	0	0	0	1.58496	0	0	2.32193	0	0	0	0
CEP290	0	6.08746	5.49185	0	5.32193	2.32193	0	4.39232	0	0	0	0	0	5.58496	0	6.22882	0	0	0	0	0	0	4.32193	0	5.12928	0
CEP55	0	0	0	0	1.58496	0	3	4.70044	0	0	0	0	0	0	2	0	0	0	0	0	0	0	0	0	0	0
CEP57	1.58496	0	0	0	0	1	3	0	0	0	0	0	0	0	0	1.58496	0	2.32193	0	0	0	0	0	0	0	1
CEP63	0	0	0	0	1	0	0	3.32193	3.16993	2	0	0	0	0	0	3.16993	0	0	0	0	0	0	0	0	0	0
CERS2	4.58496	3.80735	6.47573	7.62205	6.9542	7.40088	5.64386	7.04439	6.56986	6.22882	6.04439	6.04439	6.75489	1	0	2	4.45943	3.80735	5.55459	5.20945	3.16993	0	0	4.08746	6.20945	5.83289
CERS5	0	1	0	0	1	0	0	1.58496	2	0	0	2.80735	0	0	0	0	1	0	0	0	0	0	0	0	0	0
CERS6	0	0	0	2.80735	2.32193	1	2.32193	3.32193	3.16993	2.32193	2.58496	2.32193	1.58496	0	0	0	0	0	0	0	0	0	0	0	0	2.58496
CES1	0	8.44708	7.31288	0	9.13443	0	0	3.90689	4.85798	0	0	0	0	5.2854	0	6.02237	7.01123	6.42626	0	0	10.4136	7.48382	6.83289	0	5.08746	3.80735
CES1P1	0	1.58496	0	0	4.08746	0	0	0	0	0	0	0	0	0	0	1.58496	3.32193	0	0	0	5.49185	2.80735	0	0	0	0
CES2	3.70044	0	0	5.85798	9.63844	7.89482	8.18488	3.16993	6.06609	8.74147	9.32643	8.49985	6	0	0	0	0	0	2.80735	5.58496	1.58496	0	0	0	6.30378	0
CES4A	0	0	0	0	4.16993	1.58496	1.58496	0	0	0	2.58496	0	0	0	0	0	0	0	0	0	0	0	0	0	0	0
CFAP100	0	1	0	0	0	0	0	0	0	0	0	0	0	0	0	0	0	0	0	0	0	0	0	0	0	0
CFAP20	0	3.45943	1	0	2	0	3.32193	0	1	0	0	0	0	0	0	0	0	0	0	0	0	0	0	0	1.58496	0
CFAP221	1	1	0	0	1.58496	0	0	0	0	0	0	0	0	0	0	0	0	0	1.58496	0	0	0	0	0	1.58496	0
CFAP44	0	0	0	0	0	0	0	0	0	0	0	0	0	0	1.58496	0	0	0	0	0	0	0	0	0	0	0
CFAP52	0	0	0	0	0	0	0	1.58496	0	0	0	0	3.45943	0	0	0	2.80735	0	0	0	0	0	0	0	1.58496	0
CFAP61	0	0	0	0	0	0	0	0	0	0	0	0	4.32193	0	0	0	0	0	0	0	0	0	3.70044	0	2	0
CFB	0	6.26679	2.80735	0	2	2.80735	3	5.90689	0	0	0	5.61471	0	0	0	0	0	4.16993	3	7.2854	0	3.32193	0	0	0	0
CFDP1	0	1.58496	1	0	3	0	5.2854	0	0	0	0	0	0	0	0	0	0	0	0	0	0	0	0	0	2	1
CFH	0	6.16993	3.16993	0	5.2854	0	4.64386	4.75489	0	0	4	0	0	0	0	0	0	0	0	8.76155	0	0	0	0	0	0
CFHR1	0	3	3.70044	0	2.58496	1	0	0	0	0	0	0	0	0	0	2.58496	0	0	0	4.58496	0	0	0	0	2.58496	0
CFL1	8.2384	10.6528	9.50383	9.72792	9.49586	9.55842	10.4788	9.48382	6.80735	9.85643	9.25503	9.64024	9.53138	6.30378	8.75822	9.8009	7.69349	8.37938	8.92778	9.43879	6.55459	9.04166	7.13955	6.42626	9.65464	9.75489
CFL2	5.70044	7.56986	6.65821	6.87036	7.44294	6.49185	7.2854	6.2854	4.80735	6.84549	6.72792	6.72792	6.6865	4.24793	6.16993	6.50779	5.35755	5.83289	5.88264	6.37504	4.9542	5.78136	5.08746	3.80735	7.31288	6.26679
CGB3	0	0	0	0	0	0	0	0	0	0	0	0	1.58496	0	0	0	0	0	0	0	0	0	0	0	0	0
CGGBP1	0	3.58496	2.32193	1.58496	3.32193	0	3.70044	2.32193	0	0	0	1	0	0	0	0	0	0	0	1	0	1.58496	0	0	1	0
CGN	1.58496	0	0	4.85798	4.16993	6.61471	6.20945	6.75489	7.07682	7.82018	7.14975	6.71425	4.45943	0	0	0	0	0	1	2	5.64386	3	6.06609	0	6.84549	5.04439
CGREF1	1.58496	0	0	1.58496	2.32193	0	4.85798	0	0	0	3	1.58496	4.64386	0	0	0	0	0	0	3	0	0	0	0	0	2.58496
CH25H	0	0	0	0	0	0	0	0	0	0	0	0	0	0	0	0	0	0	0	0	0	0	0	0	0	0
CHAF1A	0	0	0	0	2	0	3.70044	3.90689	3.90689	0	4.16993	0	0	0	0	0	0	0	0	0	0	0	0	0	0	2.32193
CHCHD2	2.58496	4.32193	3.90689	4.85798	4.9542	4.16993	4	4	2	5.08746	3.58496	6.04439	4.64386	0	3.16993	0	0	1.58496	4.16993	3.80735	0	0	1	0	2.32193	4.64386
CHCHD2P9	1	2	2	1.58496	3.58496	3.16993	0	3	1.58496	4.16993	2.80735	4.64386	3.80735	0	0	0	0	1	2.58496	2.32193	0	0	0	0	1	3.58496
CHCHD3	4.24793	6.08746	6	5.12928	5.64386	5.35755	6.10852	6.20945	4.75489	6.24793	6.49185	6.32193	5.70044	0	1.58496	2.80735	2.58496	3.80735	5.2854	3.80735	0	4.39232	4.08746	2.58496	5.2854	5.75489
CHCHD4	0	3	0	0	2.80735	1.58496	2.80735	3.45943	0	2	3	1	0	0	0	0	0	0	3.16993	0	0	0	0	0	1	2
CHCHD6	0	1.58496	0	4.24793	4.9542	1.58496	3	4.45943	0	3.45943	5.04439	4.45943	2	0	0	0	0	0	0	3.45943	0	0	0	0	1	3.58496
CHCHD7	0	0	0	1.58496	3.16993	1	3.45943	0	0	0	0	0	0	0	0	0	0	0	0	1.58496	0	0	0	0	0	0
CHD1L	4.45943	3.58496	0	4.24793	4.08746	5.35755	0	6.30378	0	0	0	5.45943	0	0	0	0	0	4.64386	0	0	0	0	0	0	4.16993	0
CHD2	0	2.58496	2	0	4.85798	2.32193	4.64386	1	0	2.32193	0	3.32193	0	0	0	0	0	0	2.32193	0	0	3.58496	4	0	1	0
CHD4	5.20945	4.70044	0	8.47168	7.2384	7.90689	8.3837	8.34873	6.80735	0	6.16993	7.67243	6.90689	3.70044	1.58496	0	4.64386	5.39232	3.58496	0	5.61471	5.20945	5.93074	5.52356	6.61471	6.93074
CHD5	5.08746	4.32193	0	6.24793	3.16993	5.67243	6.44294	5.20945	2.32193	0	2.80735	3.58496	3.16993	0	1	0	0	0	0	0	0	0	0	0	3.58496	4
CHEK1	0	0	3.90689	0	3.58496	0	2	0	0	0	0	0	0	0	0	0	0	0	0	0	0	0	0	0	0	0
CHEK2	0	0	0	0	3	3.70044	4.85798	0	2.58496	2.32193	0	0	0	0	0	0	0	1.58496	0	0	0	0	3.16993	0	0	0
CHERP	2.32193	5.20945	0	6.08746	6.53916	5.78136	5.35755	6.37504	5	5.64386	5	6.40939	5.52356	0	0	0	2.32193	0	4.24793	0	3	4	4.9542	4.52356	5.08746	4.80735
CHFR	0	0	0	0	3.16993	1.58496	1	0	0	1	0	0	0	0	0	0	0	3.70044	0	0	0	3.80735	0	0	0	1.58496
CHID1	4.08746	7.06609	5.67243	5.72792	4.90689	6.37504	6.37504	6.85798	4.32193	0	6.55459	5.90689	5.93074	0	0	4.32193	5.61471	4	5.85798	4.64386	2.80735	4.39232	4.08746	4.39232	5.80735	6.32193
CHKB	1.58496	4.85798	3.16993	0	2	1	0	2.80735	1	0	2.32193	0	0	0	0	0	1.58496	0	0	1.58496	0	0	0	0	2	1
CHL1	0	0	0	0	2.32193	0	0	0	0	0	0	0	1	0	0	0	0	0	0	0	1.58496	0	0	0	0	0
CHMP1A	0	0	0	0	1.58496	0	0	2.80735	0	0	0	2.32193	0	0	0	0	0	0	0	0	0	0	0	0	0	0
CHMP2B	1.58496	3.45943	0	4.58496	3.58496	2	4.32193	3	0	0	0	3.90689	4	0	1.58496	0	0	0	0	1.58496	0	0	0	2	0	0
CHMP4A	0	5.58496	3.70044	0	2.32193	2.80735	3.90689	0	2.80735	3.90689	2.80735	4.08746	4.64386	0	3.80735	3.58496	3.58496	3	0	0	0	0	0	0	4.08746	3.45943
CHMP4B	0	3.70044	2.80735	4.9542	0	3.32193	4	4.39232	2.58496	3.70044	3.80735	4.75489	4	0	3	2.80735	0	1.58496	3	1.58496	0	0	0	0	2	4.08746
CHMP5	0	4.08746	3	4.52356	3.58496	1	3.45943	3.70044	0	4.39232	3.58496	4.08746	4.08746	0	2.58496	2	1	0	1.58496	0	0	0	0	0	4	3.80735
CHN2	0	0	0	0	2.80735	0	1	0	0	4.45943	0	0	0	0	1.58496	2	0	0	4	0	0	2.80735	3.16993	0	0	0
CHP1	2	4.16993	0	4.70044	6	5.55459	3.80735	5.16993	4.08746	4	5.16993	3.80735	4.64386	2	3.70044	2.80735	2.80735	3.16993	4.08746	0	5.55459	4.64386	3.16993	3.90689	4.75489	2
CHRNA1	0	0	0	0	2	0	0	0	0	0	0	0	0	0	0	0	0	0	0	0	0	0	0	0	0	0
CHRNA6	0	0	0	0	2	0	0	0	0	0	0	0	1.58496	0	0	0	0	0	0	0	0	0	0	0	0	0
CHST11	0	0	0	0	1	0	0	1	0	0	0	0	0	0	0	0	0	0	0	1.58496	0	0	0	1	0	0
CHST6	1.58496	0	0	0	0	0	0	0	0	0	0	0	0	0	0	0	0	0	0	0	0	0	0	0	0	0
CHTF8	0	0	1	0	2.58496	0	0	0	0	0	0	0	2	0	0	0	0	0	0	0	0	0	0	0	0	0
CIAO1	0	0	2.58496	2	1	1	3.58496	3.16993	1	2.32193	0	2.80735	0	0	0	0	0	0	0	0	0	0	0	0	2	0
CIAPIN1	0	4.90689	3.80735	5.58496	4.64386	3.70044	6.53916	6.78136	0	5.80735	5.80735	5.08746	4.16993	0	0	0	0	0	0	0	0	0	0	0	5.08746	4.08746
CIB1	3.80735	1.58496	0	3	3.45943	6.10852	4.75489	6.06609	5.2854	4.08746	6.04439	5.42626	5.52356	0	1.58496	0	0	2	6.16993	4	4	4.24793	0	2	3.80735	4.32193
CIB2	0	0	0	0	2	0	1.58496	0	0	1	0	0	0	0	0	0	0	1	0	0	0	0	0	0	0	0
CIC	0	4.90689	0	4.90689	4.52356	0	0	4.45943	0	0	5.39232	0	0	0	0	0	0	0	0	0	0	0	0	0	0	0
CIRBP	0	5.97728	4.32193	5.64386	4.58496	3.70044	4.75489	4.16993	3.70044	5.12928	5.52356	5.04439	4.39232	0	1	3.45943	3.45943	0	3.58496	4.08746	0	3	0	0	3.32193	2.80735
CISD1	2.32193	3.45943	0	2.32193	4.80735	4.08746	6.24793	5.04439	4.39232	3.45943	4.08746	0	3.16993	0	0	3.90689	1.58496	3.70044	5	0	4	2.32193	2.58496	4.45943	3.45943	5
CISD2	3.32193	6.20945	5.39232	4.75489	6.10852	5.55459	6.12928	5.64386	1.58496	3.80735	4.32193	4.16993	4.70044	1.58496	0	5.49185	4.58496	3.16993	4.32193	4.58496	2.80735	5.64386	0	4.52356	5.90689	5.58496
CIT	4.16993	0	0	0	1.58496	0	4	0	0	0	0	0	0	0	0	0	0	0	0	0	0	0	0	0	0	0
CKAP4	7.94251	8.54303	7.67948	8.85798	9.43254	9.07146	9.10852	8.43463	8.74819	7.72792	8.73132	6.93074	7.82655	5.35755	6.97728	7.04439	6.53916	7.40088	8.5812	7	6.80735	8.19476	7.52356	6.59991	7.85798	7.15987
CKAP5	4.45943	8.13443	6.02237	7.60733	8.50779	7.82018	9.16742	8.43879	5.75489	5.90689	6.97728	7.30378	5.78136	0	0	5.04439	2.80735	0	4.75489	2.80735	0	0	5.20945	4.64386	7.71425	7.29462
CKB	0	1	0	7.16993	7	0	4.58496	0	0	4.24793	0	6.32193	0	0	0	2	2	0	0	0	0	0	8.44294	6.88264	8.75154	5.2854
CKMT1A	4.08746	1	1.58496	7.35755	6.65821	9.32418	8.04439	7.90689	7.52356	7.46761	8.16993	6.26679	7.55459	3.16993	0	0	2.32193	0	7.97728	7.17991	4.39232	0	0	5.55459	5.83289	5.35755
CKMT1B	2.58496	0	0	7.12928	5.45943	8.86419	7.63662	8.224	6.84549	7.21917	7.88264	6.49185	7.16993	1	0	0	0	0	7.70044	7.05528	3	0	0	3.16993	4.39232	4.58496
CKMT2	0	1	0	3.70044	2.58496	5.80735	5.2854	5.12928	5.35755	4.16993	4.70044	4	3.45943	0	0	0	0	0	4	0	0	0	0	3.45943	3	2.80735
CKS1B	0	0	0	0	3	1	4.64386	0	0	0	0	0	0	0	0	0	0	0	0	0	0	0	0	0	1	0
CKS2	0	0	0	0	2.58496	0	4.16993	0	0	0	0	0	0	0	0	0	0	0	0	0	0	0	0	0	0	0
CLASP1	7.13955	6.94251	0	6.26679	6.39232	4.90689	7.8392	1	5.24793	0	4.64386	0	4.64386	0	0	0	0	4.58496	5.42626	4.24793	5.58496	0	0	5.70044	0	4.24793
CLASP2	5	8.49985	6.79442	5.20945	7.71425	7.54689	5.90689	6.33985	5	4.52356	4.58496	4.70044	6.14975	0	0	6.61471	4.45943	6.32193	1.58496	0	5.45943	3.32193	4.85798	5.55459	5.16993	4.9542
CLCC1	5.49185	7.22882	7.03342	6.72792	7.05528	8.17991	7.54689	7.52356	6.70044	6.14975	7.58496	7.13955	6.55459	0	0	4.75489	4.39232	2.58496	7.18982	5.9542	2.58496	3.90689	0	3.90689	7.08746	6.08746
CLCN2	0	0	0	0	1	5.49185	0	1.58496	0	0	0	0	0	0	0	0	1	0	4.90689	0	0	0	0	0	0	1.58496
CLDN18	0	0	3.16993	3.32193	3.45943	1	0	0	0	3.58496	5.80735	3.80735	0	0	0	0	0	0	0	0	0	0	0	0	3.90689	0
CLDN3	0	0	0	1	1.58496	0	0	0	1.58496	1	0	1	0	0	0	0	0	1	3.32193	3.70044	0	1	3	3.32193	0	1
CLDN7	0	0	0	0	0	0	1	0	0	0	0	0	0	0	0	0	0	0	0	0	0	0	0	0	0	0
CLEC18A	0	0	0	0	1.58496	0	0	0	0	0	0	0	0	0	0	0	0	0	0	0	0	0	0	0	0	0
CLEC18C	0	0	0	0	1	0	0	0	0	0	0	0	0	0	0	0	0	0	0	0	0	0	0	0	0	0
CLEC4C	0	0	0	0	1	0	0	0	0	1	0	0	0	0	0	0	0	0	0	0	0	0	0	0	0	0
CLEC4D	0	0	0	0	1	0	0	0	0	0	0	0	0	0	0	0	0	0	0	0	0	0	0	0	0	0
CLECL1	1.58496	0	0	0	2.80735	0	2	0	0	0	0	0	0	0	0	0	0	0	0	0	0	0	0	0	0	0
CLIC1	6.89482	8.37504	6.90689	7.25739	7.13955	8.04439	8.06609	7.70044	7.21917	7.58496	7.33092	7.72792	7.52356	4.70044	6.89482	6.42626	6.70044	6.24793	6	6.49185	6	6.14975	5.45943	5.80735	7.37504	6.49185
CLIC2	0	5.20945	3	0	2.58496	0	0	3.16993	0	1	0	2.80735	0	0	0	0	0	0	0	0	0	0	2.32193	0	3.90689	0
CLIC3	2.80735	4	2	4	1.58496	3	0	2	0	0	0	0	0	0	2.32193	0	0	0	2.32193	0	0	2	0	0	0	0
CLIC5	0	5.12928	0	0	2.58496	0	1	2	0	0	0	3.70044	0	0	0	0	0	0	0	0	0	0	0	0	2	0
CLINT1	5.72792	8.15987	6.16993	7.36632	7.40939	7.67948	7.91289	7.55459	5.93074	8.34873	7.41785	7.11894	7.11894	0	3.90689	5.2854	2.80735	6	7.05528	6.39232	5.80735	6.32193	4.80735	4.75489	6.9542	6.89482
CLMN	0	2.80735	3.16993	6.40939	5.08746	5.49185	6.91886	5.52356	0	0	6.65821	6.04439	5.12928	0	3	0	2	0	3.70044	5.20945	0	4.85798	0	0	4.52356	4.45943
CLN3	0	0	0	0	1	0	1	0	0	0	0	0	0	0	0	0	0	0	0	0	0	0	0	0	0	0
CLN6	0	5.52356	3.90689	6.30378	4.75489	5.9542	5.20945	6.39232	4.45943	3.45943	6.42626	5.64386	4.70044	0	0	0	4.08746	0	5.08746	4.39232	0	0	0	0	6.16993	4.75489
CLN8	1.58496	0	2	0	0	1	1	0	1.58496	0	0	0	0	0	0	0	0	0	0	2.32193	0	0	0	0	0	1.58496
CLNS1A	2.58496	2	1.58496	1	0	3	4.16993	2.58496	2	3.16993	0	4.58496	3.32193	0	2	0	0	0	0	0	2	0	2.58496	1	3.16993	3.58496
CLP1	0	0	0	0	3	0	0	2.80735	1.58496	0	0	0	3	0	0	0	0	0	0	0	0	0	0	0	0	0
CLPB	0	5.85798	4	0	5.64386	5.75489	0	6.32193	0	0	7.16993	6.71425	4.64386	0	4.80735	4.80735	6	3.90689	0	1.58496	0	0	4.08746	0	5.90689	7.2384
CLPP	0	4.45943	1	5.24793	5.55459	6.40939	4.90689	5.2854	4.9542	4.70044	5.70044	5.78136	5.72792	0	2.32193	3.16993	2	3	4.70044	0	0	1	0	0	4.45943	4.08746
CLPTM1	4.24793	6.26679	6.30378	6.78136	4.08746	7.43463	6.85798	7.66534	7.35755	5.78136	6.2854	6.20945	5.08746	1	0	0	3.90689	3.45943	5.42626	3.32193	0	4.39232	3.58496	1.58496	5.9542	5.9542
CLPTM1L	2.80735	4.70044	5.24793	4.70044	5.45943	5.9542	5.64386	5.75489	5.32193	4.80735	3.90689	3.16993	3.58496	0	0	1.58496	2.32193	2.32193	2	2.32193	3.16993	1.58496	2	1.58496	5.72792	5.70044
CLTA	6.47573	7.43463	7.09803	7.34873	6.33985	6.61471	7.27612	6.9542	5.80735	6.45943	7.22882	7.76818	7.46761	5.39232	6.33985	6.56986	4.75489	6.30378	7.07682	4	4.24793	5.90689	5.83289	0	5.75489	6.49185
CLTB	0	6.22882	4.75489	4.9542	4.85798	5.78136	5.55459	6.20945	0	5.83289	6.35755	6.10852	5.75489	0	5	1.58496	0	1.58496	4.39232	4.80735	2.32193	3.32193	0	0	5.24793	5.39232
CLTC	11.0694	11.7385	11.0334	10.7985	11.1209	11.6887	11.6537	10.8556	10.9578	10.3923	10.4073	10.4969	9.76984	7.42626	9.16742	9.8009	10.2264	10.3955	10.5999	9.68475	10.1163	9.94837	10.1111	9.86573	10.6644	10.4522
CLTCL1	8.67596	9.84862	9.28771	8.41363	8.98584	9.23362	9.35535	8.39232	8.55075	8.17493	8.59991	7.74147	7.75489	4.45943	6.52356	7.97154	8.09803	8.69349	7.97154	6.91886	7.99435	7.62205	8.05528	7.48382	8.44708	7.93664
CLU	2	6.44294	5.39232	0	5.32193	5.39232	0	6.08746	4.80735	0	6.26679	6.40939	6.30378	0	0	0	3	7.63662	5.97728	9.35755	1	5.42626	2	3.90689	6.26679	4.9542
CLUH	0	1.58496	0	6.12928	6.2854	7.2384	7.40088	5.08746	4.32193	5.04439	4.16993	7.99435	0	0	0	0	0	0	0	0	4.58496	3	5	3.90689	6.6865	3.80735
CLYBL	0	0	0	0	2	5.08746	0	1.58496	1.58496	4.9542	1	0	4.75489	0	0	0	0	0	2.80735	0	0	2.58496	0	0	4.70044	0
CMA1	0	0	0	0	0	0	0	0	0	0	0	0	0	0	0	0	0	0	0	0	0	0	0	0	0	0
CMAS	0	2.32193	0	4.90689	4.70044	3.32193	3.58496	4.16993	5.42626	2	1.58496	6.67243	3.32193	0	0	0	0	0	2.32193	0	0	0	0	0	1	7.02237
CMBL	0	0	0	3.32193	2	0	2.32193	2.58496	3.16993	0	0	3.90689	2.58496	0	0	0	0	0	0	1	2	4.32193	0	0	4.45943	2
CMC2	0	3.80735	0	0	5.49185	0	5.64386	0	0	0	2	0	0	0	0	0	0	0	0	3.32193	0	0	1	0	0	0
CMPK1	7.12928	6.37504	6.06609	7.20945	7.19967	7.98299	8.36632	6.96578	6.06609	6.85798	7.16993	7.19967	7.46761	1.58496	5.80735	6.08746	3	5.12928	5.04439	5.24793	7.59991	6.61471	5.12928	5	7.16993	6.22882
CMSS1	0	0	1	0	3.70044	2.80735	1.58496	0	0	0	2	0	0	0	0	0	0	0	0	0	0	0	0	2.32193	2	2.32193
CNDP2	7.94837	10.0014	10.1662	8.98584	6.52356	10.043	9.56986	8.50383	7.65105	8.15482	9.56224	8.70736	8.81698	2	7.14975	8.18982	8.10329	7.93074	7.75489	8.08215	6.96578	7.21917	7	6.42626	8.89482	8.633
CNEP1R1	0	3	0	0	1	0	1.58496	2.32193	0	0	2	0	0	0	0	0	1.58496	1	0	0	0	0	0	0	1.58496	1.58496
CNIH4	0	3	1	2	1.58496	3.32193	2.32193	2.32193	3.70044	1	1.58496	2.58496	2.58496	0	0	0	1.58496	1	2	2.32193	0	0	0	2	2	2.32193
CNN2	2.58496	7.2854	6.94251	6.40939	4.16993	6.08746	0	6.49185	3.32193	5.12928	2.58496	5.75489	7.33985	6.26679	5.16993	4.70044	4.24793	4.08746	4.32193	0	3.80735	5.35755	4.90689	2.80735	5.32193	0
CNN3	0	2.58496	0	7.04439	3.70044	2.58496	4.24793	3.16993	1	3.90689	0	3.58496	2	0	1.58496	0	0	0	4	0	0	0	4.24793	0	3.16993	2
CNNM2	0	0	0	0	3	3.45943	2.80735	0	3.80735	3.16993	3.32193	0	0	0	0	0	0	0	0	0	0	0	0	0	0	0
CNNM3	0	4.70044	0	2.32193	5.08746	5.52356	5.93074	5.39232	0	2.32193	6.06609	0	0	0	0	0	0	0	0	3.70044	0	0	0	0	3.32193	4.70044
CNNM4	0	0	0	4.64386	0	4.45943	4.64386	3.70044	2.58496	3.90689	3	0	2.58496	0	0	0	0	0	3.90689	2.58496	0	0	0	0	0	4.08746
CNOT1	9.02791	9.59059	7.39232	6.49185	8.96867	8.80735	9.79116	8.91588	7.65821	5.88264	7.33092	7.31288	6.40939	0	5.52356	7.13955	6.40939	6.89482	6.75489	6.62936	7.81378	7.01123	7.08746	7.66534	8.41363	6.45943
CNOT10	3.90689	6.58496	2.32193	0	4.58496	4.58496	7.04439	6.04439	0	2.32193	3.58496	3.16993	0	0	0	0	0	0	3.80735	2.80735	3.58496	3.90689	3.45943	0	1	0
CNOT2	5.9542	6.80735	2.32193	5	5.16993	5.64386	6.24793	5.93074	0	4.08746	4	6.39232	4.16993	0	2	3.16993	0	1.58496	1.58496	0	2.80735	0	2.58496	1.58496	5.24793	2
CNOT3	0	2.80735	1.58496	3.45943	1.58496	0	5	3.58496	0	0	2.58496	4.45943	1	0	0	0	0	0	0	0	0	0	0	0	2	0
CNOT7	0	5.88264	3	2.32193	3.45943	4.16993	6.06609	4.52356	1.58496	2.80735	3.80735	3.90689	3.16993	0	1.58496	2.58496	2.32193	0	2.80735	1	3.80735	3.58496	0	0	2.58496	3.90689
CNOT9	2	3.70044	1	2.32193	3	2	4.45943	2.32193	0	2	1	2.32193	0	0	0	0	1.58496	0	0	1.58496	1	0	0	0	3.32193	2
CNP	1	6.56986	0	4.9542	3.58496	5	6.88264	5.88264	4.08746	0	5.08746	5.12928	4.75489	2.80735	2	0	4	0	3.32193	0	3.58496	3.32193	7.33985	0	1.58496	2.80735
CNPY2	7.88264	7.49985	6.64386	7.53138	7.42626	7.60733	8.52748	7.20945	7.39232	7.86419	7.78136	7.56224	7.25739	6.16993	7.04439	6.42626	5.2854	6.04439	6.49185	3.45943	7.10852	6.35755	6.49185	5.67243	6.50779	6.08746
CNPY3	0	5.67243	3.90689	3.70044	2.80735	1	4.64386	4.08746	2.32193	3.16993	2.80735	4.16993	4.24793	1.58496	2	4.58496	3	3.80735	3.16993	0	1.58496	1.58496	0	0	2.80735	3.16993
CNTN6	0	0	1	0	1.58496	0	0	0	0	0	0	0	0	0	0	0	0	0	0	0	0	0	0	0	0	0
COA3	2	0	1.58496	0	3.45943	3.90689	2.58496	2.80735	3	0	3.32193	2	2.58496	0	1.58496	0	1	0	2	0	2.32193	0	1	0	3.16993	4.16993
COA6	2.32193	3.16993	1.58496	1.58496	3.80735	3.32193	4.9542	3.45943	2.32193	3	4	1.58496	3.45943	0	3.16993	2.32193	1	2.80735	3.32193	2.80735	3.45943	2.32193	3	3.32193	2	4
COA7	0	3.32193	3.45943	0	4.32193	3.58496	5.16993	3.70044	0	4.64386	4.32193	2.80735	1.58496	0	0	0	0	2.32193	3	0	2.32193	0	2.58496	0	3	2.80735
COASY	3.16993	5.90689	4.45943	5.72792	5.88264	5.70044	7.50779	5.64386	3.16993	6.35755	5.32193	5.58496	2	0	0	3.16993	2.58496	1.58496	4.24793	5.35755	3	0	4.32193	3.16993	6.08746	5.24793
COBL	0	0	0	0	4.08746	0	0	0	0	0	4.08746	0	0	0	0	0	0	0	0	0	0	0	0	0	0	0
COBLL1	0	0	4.80735	7.11894	2	5.04439	0	5.75489	0	2.80735	3.90689	0	0	4.85798	3.58496	0	0	0	6.30378	5.2854	0	0	0	0	4.64386	0
COG1	0	5.39232	0	6.06609	5.32193	4.58496	6.10852	4.16993	3.58496	3.45943	4.08746	3.90689	4.08746	0	0	2.58496	0	0	2.80735	0	0	0	0	0	4.64386	4.32193
COG2	3.16993	3.58496	3.16993	6.02237	6.44294	5.93074	6.79442	4.45943	5.08746	1.58496	5.04439	5.83289	5.61471	0	0	0	0	3.45943	4.90689	3.80735	4.80735	4.45943	0	0	5.64386	5.16993
COG3	2.58496	0	0	3.80735	4.70044	4.64386	5.39232	3.90689	5.32193	3.70044	3	2	0	0	0	0	0	0	2.32193	0	0	3.16993	0	0	3.70044	2
COG4	4.24793	6.53916	5.85798	6.14975	6.59991	5.32193	7.6865	7	5.78136	6.35755	5.04439	7.10852	6.04439	0	3.16993	0	2.32193	0	5.49185	4.08746	0	5.08746	0	3.45943	6.42626	5.12928
COG5	4.70044	7.22882	3	6.65821	7.08746	7.88874	7.91886	7.70044	5.83289	6.42626	6.16993	7.01123	6.02237	0	0	0	0	0	0	5.2854	0	0	0	0	7.01123	6.44294
COG6	3.80735	5.39232	4.24793	6.62936	5.93074	4.24793	7.03342	5.80735	4.16993	4.85798	5.20945	5.97728	3.80735	0	0	0	0	0	4	4	0	0	0	0	5.55459	4.64386
COG7	4	5.2854	3.32193	4.9542	5.2854	4.64386	6.44294	4.32193	3.32193	4.16993	4.32193	4.70044	4.58496	0	0	0	2.80735	0	3.70044	3.16993	2.80735	1	2.80735	3.80735	5	4.08746
COG8	3.16993	4.85798	5.52356	6.18982	6.39232	6.06609	7.18982	5.80735	3	4.16993	3.80735	5.58496	4.39232	0	0	4.16993	0	2.32193	2.80735	3.16993	4.16993	0	1.58496	3.32193	6.18982	5.75489
COL14A1	0	2.32193	0	0	1.58496	0	0	0	0	0	0	0	0	0	0	0	0	0	0	0	0	0	0	0	0	0
COL19A1	0	0	0	0	0	0	0	0	0	0	0	0	0	0	0	0	0	0	1.58496	0	0	0	0	0	0	0
COL20A1	0	0	4.64386	0	4.39232	0	0	0	0	0	0	0	0	0	0	0	0	0	0	0	0	0	0	0	0	0
COL4A5	0	0	4	1	4.39232	0	0	3.32193	0	0	0	0	2.32193	0	0	0	0	0	0	0	0	0	0	0	0	0
COL6A3	0	0	0	0	5.80735	0	0	0	0	0	0	5.49185	0	0	0	0	0	5.90689	2.32193	6.78136	0	0	0	0	0	0
COL7A1	0	0	0	0	4.9542	0	0	0	0	0	0	0	0	0	0	0	0	0	0	0	0	0	0	0	0	0
COL9A3	0	0	0	0	0	0	0	0	0	0	0	0	0	0	0	0	0	0	0	0	0	0	0	0	0	0
COLGALT1	3	8.18982	7.05528	4	3.90689	5.64386	7.94251	6.50779	6.02237	4.24793	6.18982	6.2854	4.08746	0	3.45943	5.24793	5.67243	6.06609	4.45943	0	3.45943	2	3.32193	5.24793	5.67243	6.56986
COLGALT2	0	3.16993	0	0	3.16993	0	0	0	0	0	0	0	0	0	0	0	0	0	0	0	0	0	0	0	0	1.58496
COMMD1	0	4.75489	0	2.58496	0	3.58496	2.58496	3.70044	3.32193	0	1.58496	4.08746	3.90689	0	2.32193	0	0	3.70044	0	0	0	0	0	2	3.90689	2.58496
COMMD2	4	5.04439	3.32193	3.70044	4.08746	3.58496	4.32193	3.80735	2.80735	2	4.16993	3.58496	2.58496	0	0	2	3.16993	4.16993	2.32193	1.58496	1.58496	0	0	3.32193	4.64386	3.58496
COMMD3	3.32193	5.49185	1.58496	3.58496	3	3.58496	3	3.58496	3.80735	2	1.58496	2.80735	1	2.58496	2.32193	3.16993	4	3.90689	3.80735	0	4.39232	0	3.16993	2	4	1.58496
COMMD3-BMI1	0	4	0	2.32193	0	1.58496	2	3.90689	1	1.58496	0	0	0	1.58496	0	1	2.80735	2	0	0	2	0	0	1.58496	1	2.80735
COMMD4	0	5.64386	2.32193	0	0	3.32193	3.45943	0	0	0	2.32193	1	0	0	0	0	4.64386	0	3.58496	0	0	2.32193	2	0	3.45943	2.80735
COMMD5	0	3	3	3.16993	1.58496	3.90689	1.58496	0	0	0	0	0	0	0	0	1.58496	0	0	1	0	0	0	0	0	1	2.32193
COMT	7.15987	8.82337	9.38802	7.7211	4.85798	8.40514	8.19476	7.99435	7.12928	7.94251	8.02791	6.30378	6.50779	1	5.32193	7.49185	7.67948	6.88264	6.30378	7.25739	0	6.84549	4.39232	3	8.47978	7.24793
COMTD1	0	0	0	5	7.53916	2	0	6.20945	3.70044	2	5.39232	5.52356	0	0	0	0	0	0	2.32193	0	0	0	0	0	4.32193	6.49185
COPA	6.61471	8.66888	7.35755	8.24793	7.74147	9.18982	8.70736	8.25739	8.73471	6.47573	7.83289	7.62936	7.60733	0	5.12928	5.80735	6.74147	6.02237	8.09276	6.2854	6.02237	7.20945	5.75489	5.83289	8.46761	7.31288
COPB1	8.37504	9.3837	8.32193	8.2384	9.28309	9.07414	9.20212	8.35755	8.59246	7.72792	8.08746	7.97154	7.91886	2	4.9542	6.55459	7.59246	7.25739	7.99435	7.59991	7.35755	7.06609	7.09803	7.90087	8.71425	7.70044
COPB2	7.13955	9	7.7211	8.56224	7.39232	8.88264	8.90388	8.55459	8.60733	7.83289	7.63662	7.99435	7.98299	0	6.33985	6.75489	6.64386	6.53916	7.7211	6.80735	7.20945	6.67243	6.39232	7.11894	8.65105	8
COPE	7.11894	7.72792	6.49185	7.91289	7.64386	8.02237	8.17493	7.22882	7.65821	5.97728	6.85798	7.36632	7.50779	3.16993	5.35755	5.90689	5.70044	6.20945	6.96578	6.53916	6.59991	6.65821	5.20945	5.61471	7.55459	6.87036
COPG1	7.10852	8.7211	7.98868	8.41363	8.97154	8.35755	9.14975	8.14466	7.52356	7.48382	7.67948	8	7.71425	0	5.32193	7.2854	6.6865	6.52356	7.56224	7.33985	6.70044	7.29462	6.45943	6.58496	8.24317	7.21917
COPG2	6.14975	8.2384	6.53916	7.17991	7.03342	8.02791	6.9542	6.52356	6.58496	6.2854	5.9542	6.2854	5.52356	0	0	3.90689	5.52356	5.75489	4.90689	6.02237	4.58496	4.08746	4.80735	4.39232	6.79442	6.91886
COPS2	4	6.61471	4.70044	5.45943	5.2854	5.93074	7.04439	4.45943	5.61471	0	4	3.70044	4.58496	0	2.58496	3.16993	4	2	0	0	0	2	4.58496	4.9542	5.2854	3.16993
COPS3	5.04439	7.57743	5.61471	6.22882	7.47573	6.79442	7.92481	6	3.90689	6	6.42626	6.52356	4.24793	2.80735	0	3.32193	4.58496	3.58496	5.39232	5.9542	3	0	4.08746	4.90689	5.83289	5.08746
COPS4	6.30378	7.2854	6.08746	7.40088	7.29462	6.71425	6.9542	6.35755	5.93074	7.24793	5.42626	6.98868	7.08746	4.39232	5.35755	5.04439	5.83289	6.06609	6.49185	5.32193	6.22882	5.2854	6.14975	5.80735	6.65821	6.83289
COPS5	0	2.58496	0	0	0	0	4.24793	1	4.24793	0	0	2	0	0	0	0	0	0	0	0	2.58496	0	0	0	4.24793	3.80735
COPS6	5.20945	5.12928	3.32193	4.90689	5.12928	5.70044	5.49185	4.64386	3.45943	2	3.70044	5.32193	4.39232	3.16993	3.32193	2.32193	3.45943	3.45943	3.80735	3	2.32193	3.58496	2.32193	4.52356	5.32193	4.58496
COPS7A	2.32193	5.39232	4	5.04439	5.58496	4.64386	6.04439	4	2.32193	2.80735	5.08746	3.90689	3.80735	0	0	3.90689	2	2	3.32193	3.80735	3.32193	0	3.45943	4.08746	5.64386	5.20945
COPS7B	0	5.75489	3.32193	3.90689	6.78136	3.70044	6.79442	4	0	5.2854	4.24793	5.08746	0	0	0	3.32193	0	0	3.16993	4.39232	0	3.32193	3	3.32193	3.58496	1.58496
COPS8	1	5.70044	4.08746	5.58496	4.58496	5.2854	5.55459	4.16993	2.58496	5.16993	4.16993	5.35755	4.16993	0	2	0	3.16993	0	2.32193	3.32193	0	1.58496	2.32193	2	5.39232	5.42626
COPZ1	3.90689	5.78136	6.04439	6.70044	7.40939	7.47573	7.2384	6.97728	5.42626	7.62936	5.55459	4.08746	3.80735	2.58496	0	5.52356	2.80735	3.16993	2	5.16993	4.9542	6.10852	3.45943	5.58496	6.70044	5.45943
COPZ2	0	3.58496	0	1.58496	0	0	0	1.58496	0	0	0	0	1	0	0	0	0	0	0	0	0	0	0	0	0	0
COQ4	0	0	0	0	4.9542	2.80735	4.90689	2.58496	0	2	0	0	0	0	0	0	0	0	0	0	0	0	0	0	0	1.58496
COQ7	0	0	0	3.58496	2	4.52356	4.39232	5.55459	0	5.20945	5.88264	4.75489	3.58496	0	0	0	0	0	0	1.58496	0	0	0	0	2	5.55459
COQ8A	0	0	0	0	3.80735	4.08746	3.45943	3.70044	0	2.58496	3.16993	1	0	0	0	0	0	0	0	0	2.32193	3	2.32193	3.58496	4.16993	4.45943
COQ8B	0	0	0	0	0	2.58496	0	1	0	0	0	1.58496	2.32193	0	0	0	0	0	3.32193	0	2.32193	0	0	0	1.58496	0
COQ9	4	4.64386	3.58496	4.52356	5.16993	6.93074	6.06609	6.84549	2.32193	6.74147	5.64386	6.2854	5.90689	0	1.58496	2.32193	1.58496	3.58496	5.20945	4.24793	4.16993	3.70044	2.58496	3.32193	5.72792	5.90689
CORO1A	6.2854	10.196	10.0458	5.80735	4.64386	6.96578	5.90689	8.45533	7.33092	7.21917	6.22882	6.04439	6.2854	6.62936	8.84549	8.59619	7.62205	8.32193	6.12928	2.58496	5.64386	6.26679	7.36632	3.16993	8.07682	6.97728
CORO1B	0	6.85798	5.85798	7.2854	5.24793	6.39232	6.70044	6.20945	5.04439	5.24793	6.6865	6.85798	5.88264	0	3.45943	4.85798	4.39232	4.16993	5.2854	3.90689	4.24793	4.24793	0	0	6.64386	6.18982
CORO1C	5.88264	7.70736	6.62936	4.24793	4.64386	6.10852	7.40088	7.40939	5.67243	5.88264	7.31288	5.49185	5.90689	4.32193	6.98868	6.47573	5.08746	5.85798	2.58496	3.16993	2.32193	4.45943	5.42626	0	5.04439	5.32193
CORO7	5.32193	9.84235	8.81378	6.37504	5.83289	7.79442	6.40939	7.20945	5.83289	6.22882	6.12928	5.97728	6.88264	3.45943	7.30378	6.78136	6.96578	6.6865	0	0	3.32193	0	5.12928	3	7.11894	5.61471
CORO7-PAM16	3.45943	7.34873	6.90689	4	4.75489	6.10852	5.58496	6.04439	4.80735	4.58496	5.04439	4.08746	6.16993	0	5.90689	3.80735	5.75489	3.70044	0	0	3.32193	0	2.80735	3.16993	5.35755	3.70044
COTL1	6.79442	8.55459	7.33985	0	4.45943	7.24793	5.39232	6.83289	7.31288	6.06609	6.55459	5.42626	6.16993	2.58496	6.59991	6.24793	6.83289	6.16993	4.39232	0	3.45943	5.12928	4.24793	1.58496	6.96578	5.72792
COX15	0	3.58496	2	1.58496	4.58496	4.75489	4.16993	2.58496	2	0	3.80735	3.16993	0	0	0	0	0	0	0	0	2.32193	0	0	3.16993	3.16993	3.32193
COX17	0	1.58496	0	1	0	2.32193	1	1	2.80735	0	0	0	0	0	0	1.58496	0	2	0	1	0	1.58496	0	0	1	0
COX19	0	0	0	0	2.58496	0	1.58496	0	0	0	0	0	0	0	0	0	0	0	0	0	0	0	0	0	0	0
COX20	3.90689	2.32193	2	4	4.24793	4.85798	4.24793	4.32193	3.58496	2.80735	2.80735	4.32193	4.70044	0	2.32193	0	0	0	4.58496	0	2	2.32193	1	3.16993	3.58496	4.64386
COX4I1	6.88264	8.47573	7.61471	6.89482	7.2854	8.53916	8.11374	8.65821	8.57743	7.45121	7.50779	7.3837	7.67243	4.9542	6.18982	7.19967	6.50779	7.12928	8.07146	6.12928	6.42626	6.14975	6.71425	6.90689	7.40088	7.88874
COX5A	6.12928	6.72792	6.87036	7.10852	7.2384	6.76818	6.47573	7.18982	5.08746	8.24317	7.09803	7.22882	7.12928	0	5.78136	6.42626	5.12928	5.52356	7.96	5.08746	4.85798	6.04439	5.55459	5.64386	6.12928	6.89482
COX5B	4.75489	5.80735	2.58496	4.16993	6.45943	6.04439	6.06609	6.2854	5.72792	4.70044	4.45943	4.58496	5.20945	0	4.58496	4.32193	3.16993	4.70044	5.20945	5.20945	4.80735	4.24793	4.9542	3.32193	5.2854	4.85798
COX6A1	0	3.58496	2.80735	2.32193	2.32193	2	3.80735	3.80735	1	3.16993	1.58496	1.58496	1	0	0	0	1	0	0	0	0	1	0	0	0	2
COX6B1	4.32193	6.06609	4.52356	4.80735	5.20945	5.49185	5.04439	4.58496	4.08746	5.78136	4.58496	4.24793	3.70044	2.80735	3.16993	4.90689	3.45943	4.39232	4.75489	3.80735	3.70044	4.32193	4.52356	2	4.75489	5.24793
COX6C	4.08746	4.70044	4.75489	4.75489	4.16993	5.64386	5.16993	6.26679	3.80735	5.24793	5.12928	5.08746	4.80735	0	3.80735	3.90689	4	3.32193	4.32193	3.80735	3.90689	3.32193	3.58496	2.58496	4.85798	5.12928
COX7A2	5.90689	6.18982	5.04439	6.02237	6.33985	5.24793	6.16993	5.2854	7.3837	5.04439	4.52356	4.90689	5.32193	3.16993	6.33985	4.9542	6.02237	5.72792	5.08746	4	6.16993	4.58496	6.18982	3.58496	5.55459	6.02237
COX7A2L	0	4	0	3.58496	0	0	0	4.58496	1	1	0	1	3	0	0	0	0	1	1.58496	0	0	0	0	0	2.32193	2.80735
COX7B2	0	0	0	0	1	0	0	0	0	0	0	0	0	0	0	0	0	0	0	0	0	0	0	0	0	0
COX8A	0	0	0	0	0	0	0	3.16993	0	0	2	0	0	0	0	0	0	0	0	0	0	0	0	0	0	3
CPD	6.20945	1	0	0	5.52356	7.73471	8.63662	7.93074	6.26679	5.72792	7.31288	4.9542	6.61471	0	0	0	0	0	4.9542	4.70044	5.20945	0	5.39232	0	6.2854	7.13955
CPE	0	0	0	0	3.16993	0	2	0	4.32193	0	0	0	0	0	0	0	0	0	0	0	0	0	0	1	0	0
CPEB2	0	0	0	0	1	0	0	0	0	0	0	0	0	0	0	0	0	0	0	0	0	0	0	0	0	0
CPEB3	0	0	0	0	2	0	0	0	0	0	0	0	0	0	0	0	0	0	0	0	0	0	0	0	0	0
CPEB4	0	0	0	0	2	0	0	0	0	0	0	0	0	0	0	0	0	0	0	0	0	0	0	0	0	0
CPLX4	0	0	0	0	1	0	0	0	0	0	0	0	1	0	0	0	0	0	0	0	0	0	0	0	2	0
CPNE1	5.75489	8.79766	6.49185	8.71425	7.8009	9.13699	8.37938	7.40939	8.17493	6.61471	6.35755	7.8392	5.49185	5.04439	4.24793	5.08746	4.52356	0	5.80735	3.80735	0	5.2854	4.08746	3.80735	6.45943	7.30378
CPNE2	1	4.64386	4.08746	3.45943	2.58496	1	3.58496	4.39232	3.16993	2.32193	1.58496	0	0	3.16993	0	2	1.58496	3.16993	4.16993	2.58496	2	3.70044	2.58496	4.75489	4.08746	3.16993
CPNE3	3.16993	6.85798	6	7.66534	5.20945	6.85798	8.38802	7.87036	5.32193	7.48382	6.42626	6.20945	6.42626	5.39232	5.2854	2.80735	3	4.16993	5.80735	6.55459	5.52356	3.16993	4.58496	6.2854	6.89482	7.35755
CPNE4	0	3	1.58496	0	2.80735	0	3.16993	0	0	3.32193	3.90689	2	0	3.16993	0	0	0	2	2.58496	0	1	2	2.32193	3.32193	2	4.24793
CPNE5	2.32193	0	0	0	1.58496	0	2	0	0	0	2.32193	0	0	0	0	2.58496	0	0	0	0	0	2.32193	0	3.45943	0	0
CPOX	5.08746	5.9542	3.45943	5.45943	8.11374	6.67243	6.52356	6.06609	2.32193	2.58496	5.93074	5.52356	4.64386	0	2.32193	4.08746	0	3	5.78136	4.39232	0	0	3.58496	0	4.52356	4.16993
CPPED1	5.24793	7.24793	5.83289	0	3.58496	4.52356	3.70044	4.75489	5.24793	5.39232	4.45943	0	3.58496	5.88264	3.45943	4.75489	5.52356	5.93074	0	0	4.08746	2.80735	4.64386	0	4.24793	3.16993
CPSF1	0	5.04439	0	3.58496	4.90689	4	3.90689	6.20945	4.08746	1.58496	3.58496	5.08746	0	0	0	0	0	0	3.90689	0	0	0	0	0	2.32193	0
CPSF2	0	3.90689	2.32193	3.58496	5.52356	4.80735	5.61471	5	2.80735	0	0	5.45943	2.80735	0	0	2.80735	0	0	4.64386	0	0	2	5.45943	3.70044	3.16993	4.32193
CPSF3	3.45943	0	0	3.45943	0	2	0	5.58496	1.58496	2.58496	3.58496	4.85798	2.32193	0	3.58496	0	0	0	2.80735	0	0	4.39232	0	3.80735	0	3.32193
CPSF3L	0	4.16993	3.70044	0	0	3	5.16993	2.32193	0	0	3.16993	0	0	0	0	0	0	0	4.58496	0	0	0	0	0	0	0
CPSF4	0	3	0	0	3.45943	2	1.58496	3	0	0	0	2.58496	0	0	0	1.58496	0	0	2.32193	0	0	1	2.58496	0	1.58496	0
CPSF6	3.90689	3.16993	0	3.32193	3.32193	4.32193	4.32193	3.32193	4.58496	4.80735	4.08746	4.45943	4.08746	3.16993	1.58496	0	1	0	0	0	2.80735	3.58496	3.80735	3.16993	0	4.32193
CPT1A	5.16993	8.59991	8.23362	7.60733	8.77479	9.18982	9.50184	9.16239	8.3443	8.32193	9.75154	8.13955	7.90689	0	2.80735	6.50779	5.83289	5.45943	7.19967	6.24793	7.62936	7.17991	2.80735	6.24793	7.76818	9.2854
CPT1B	2.32193	0	0	0	1	0	1	0	0	0	4.24793	0	0	0	0	0	0	0	5.78136	0	0	0	0	0	0	1
CPT1C	0	0	0	0	2	1	1	0	0	1	0	1	2	0	0	2	0	0	0	0	0	0	0	0	0	0
CPT2	4.45943	7.97728	5.39232	5.75489	6.39232	8.41785	7.18982	7.87652	7.57743	6.85798	7.16993	4.08746	6.39232	1.58496	3.90689	0	5.12928	4.70044	5.61471	2	6.42626	4.32193	4.64386	5.32193	7.57743	6.26679
CPTP	0	1.58496	0	0	3	2.32193	2.80735	0	0	0	0	0	0	0	0	0	0	0	0	0	0	0	0	0	2	0
CPZ	0	0	0	0	0	0	0	0	0	0	0	0	0	0	0	0	0	0	0	0	0	0	0	0	0	0
CRAT	3.45943	0	0	7.03342	5.85798	6.14975	0	4.52356	4.08746	4.16993	4	3.16993	2.80735	0	0	0	0	3	3.80735	0	2	0	0	0	0	3.70044
CRB3	1	0	0	0	2	0	2.58496	0	0	1	1	0	0	0	0	0	0	0	2.58496	1.58496	1.58496	0	0	0	0	0
CRCP	0	0	0	1	3.16993	1	1	3.70044	0	1	1.58496	2.32193	0	0	0	0	0	1	0	0	0	1	0	0	0	0
CREB1	0	4.64386	3.32193	2.80735	4.58496	2.32193	5.49185	3.70044	0	2.80735	5.85798	4.80735	3.45943	0	4	2.58496	0	0	1.58496	2.32193	0	2.32193	0	2.58496	2	4
CREB3L3	0	0	0	0	2	0	0	0	0	0	0	0	0	0	1.58496	0	0	0	0	0	0	0	0	0	0	0
CREB3L4	0	1	0	0	1	0	0	0	0	0	0	0	0	0	0	0	0	0	0	0	0	0	0	0	0	0
CREBRF	0	3.90689	0	0	1.58496	0	0	0	0	0	0	0	0	0	0	0	0	0	0	0	0	0	0	0	0	0
CREG1	3.58496	0	2.58496	3.58496	1	3.70044	3.58496	4.45943	1.58496	2.32193	4.52356	1.58496	3	0	1.58496	0	2	2.32193	3.45943	0	0	0	0	0	2.58496	2.58496
CRELD1	0	3.16993	3.70044	0	5.04439	2.32193	3.90689	5	0	2.58496	4.24793	0	2.58496	0	0	0	0	0	0	3.80735	0	0	0	0	2	1.58496
CREM	1	1	0	0	0	0	1.58496	0	0	0	3.16993	3.90689	2.32193	0	2	0	0	0	1	0	0	2.32193	0	2.58496	0	0
CRIM1	0	0	0	0	0	0	0	0	0	0	0	0	0	0	0	0	0	0	0	0	0	0	0	0	0	0
CRIP1	0	2.32193	4.08746	4.16993	0	4.58496	5.32193	0	0	1.58496	2.32193	3	2.32193	0	0	1.58496	0	0	0	0	0	2	0	0	0	0
CRK	0	5.67243	4.85798	5.67243	5.2854	5.42626	6.02237	5.83289	0	5.78136	5.58496	5.64386	5.49185	0	3	4.08746	3	3.16993	4.70044	1	0	1.58496	2.58496	0	5.42626	4.52356
CRKL	0	5.61471	3.90689	3.90689	4	4.70044	5.39232	4.45943	3.70044	4.85798	5.16993	4	3.58496	0	4.58496	4	4.45943	4.39232	3.90689	0	2.58496	3.16993	4.16993	0	4.80735	4.70044
CRLF3	1.58496	7.16993	4.58496	0	3	0	5.16993	2.58496	0	0	0	1	0	0	5.24793	5.67243	3.45943	5.58496	0	0	0	1	4	0	0	0
CRNKL1	0	2	0	5.80735	4.75489	5	5.20945	4.39232	4	0	0	3.90689	0	0	0	5.2854	0	0	0	0	3.70044	0	6.06609	0	3.80735	1
CRYAB	0	0	1.58496	0	0	0	0	1	0	0	0	0	0	0	0	0	0	0	6.52356	0	0	0	0	0	0	1
CRYBA2	0	0	0	0	1	2.32193	0	2	0	0	2.58496	0	0	0	0	0	0	0	0	0	0	0	1	0	0	0
CRYZ	6.20945	5.64386	5.08746	4.52356	6.45943	7.57743	6.64386	7.61471	6.72792	5.97728	7.48382	3.70044	7.42626	0	2	4.80735	4.58496	1	4.70044	4.32193	5.72792	6.80735	5.20945	5.35755	6.04439	3
CRYZL1	0	3	2.58496	0	2.32193	1	0	4.85798	0	0	3.45943	0	0	0	0	3.45943	0	0	0	0	1.58496	0	0	0	3.80735	2
CS	8.48382	9.25739	8.71081	9.11374	10.1762	9.70563	9.62753	9.48985	8.93369	9.55651	10.021	9.71425	8.93958	5.12928	6.82018	6.90689	7.91289	7.12928	8.62205	8.76487	6.96578	6.6865	7.74819	8.26679	8.74147	9.44087
CSAD	0	0	1	0	0	0	0	1	0	1.58496	0	0	2.58496	0	1.58496	0	0	0	0	0	0	0	0	0	2.80735	0
CSDC2	0	0	0	0	2.58496	0	0	0	0	0	0	0	0	0	0	0	0	1	0	0	0	0	0	0	0	0
CSDE1	5.2854	4.24793	0	6.22882	4.58496	3.90689	6.6865	4.52356	6.08746	4.52356	5.45943	5.72792	5.32193	0	3.58496	3.32193	4.39232	4.70044	0	0	4.58496	5.80735	4.64386	4.24793	4.70044	0
CSE1L	7.49985	8.45121	8.3966	8.76155	9.07146	10.29	9.24793	8.07682	7.33985	7.40088	7.22882	8.7211	7.32193	3	4.39232	4.85798	5.75489	5.32193	4.24793	6.84549	7.31288	5.80735	7.31288	8.04439	9.01123	8.18982
CSF1	0	1.58496	0	0	2.58496	0	0	0	0	0	0	0	0	0	0	0	0	0	0	2	1	0	0	0	0	0
CSGALNACT1	0	1	0	0	4.39232	0	0	2.32193	0	0	0	0	0	0	0	0	0	0	0	0	0	2.32193	0	0	0	0
CSGALNACT2	0	3.58496	0	0	1.58496	0	0	0	0	0	0	0	0	0	0	0	1	0	0	0	0	0	0	0	1	0
CSHL1	0	0	0	0	0	0	1.58496	0	1.58496	0	0	0	0	0	0	0	0	2	0	0	0	0	0	0	0	0
CSMD2	0	0	0	0	5.90689	0	0	0	0	0	0	0	0	0	0	0	0	0	0	0	0	0	0	0	4.90689	4.70044
CSN1S1	0	0	0	0	1.58496	0	0	0	0	0	0	0	0	0	0	0	0	1.58496	0	0	0	0	0	0	0	0
CSNK1A1	4.58496	3.70044	0	6.6865	3	7.45943	7.22882	7.88874	6.71425	2.32193	6.79442	5.55459	6.42626	0	0	0	0	0	5	4.9542	5.12928	3.90689	5.04439	4.80735	5.75489	6.44294
CSNK1A1L	0	0	0	3.32193	2.58496	4.08746	4.39232	4.32193	3.80735	0	3	1	3.70044	0	0	0	0	0	0	2	2.58496	0	2.32193	0	2.32193	3
CSNK1D	0	0	0	3.70044	0	4.08746	0	2.80735	3	0	0	1.58496	2.32193	0	0	2	0	0	3	0	0	3	0	0	2	0
CSNK1G1	0	0	0	0	0	2.58496	4	2.58496	0	0	2	0	0	0	0	0	3.32193	0	0	1.58496	0	0	0	2	1	0
CSNK2A1	4.64386	5.70044	3.32193	7.09803	6.22882	7.16993	7.39232	6.89482	6.67243	3.32193	6.26679	6.18982	6.24793	0	3.80735	0	2.58496	2.58496	4.70044	2.32193	4.32193	0	5	6.39232	5.70044	5.83289
CSNK2A2	4.75489	5.83289	0	4.85798	6.08746	5.35755	6.35755	5.64386	5.52356	0	3.70044	4.32193	4.70044	0	2.58496	3.32193	3.80735	2.80735	5.2854	0	3.16993	1.58496	4.39232	4.58496	5.52356	3.90689
CSNK2A3	5.12928	5	2.80735	5.55459	5.35755	5.75489	6.30378	5.2854	5.49185	3.70044	5.08746	4.64386	4.90689	1.58496	4.16993	1.58496	3.32193	2.32193	3	2.58496	3.70044	3	3.80735	5.52356	3.80735	4.80735
CSNK2B	2.32193	4.32193	0	4.90689	4.45943	4.16993	5.04439	4	3.90689	0	4.85798	3.80735	3.90689	0	2.80735	3	2	2.58496	2	0	2.32193	2.32193	2.58496	3	3.70044	0
CSNK2B-LY6G5B--991	0	3	0	2.80735	2	0	3.32193	2.32193	0	0	2	0	2.32193	0	1	0	0	0	0	0	0	2.58496	0	3.32193	2.32193	0
CST3	3	3.80735	4.16993	4.08746	4	3.70044	4.52356	4.39232	1	3.58496	3.32193	3.45943	3.70044	1.58496	3.45943	1.58496	1.58496	2.58496	4	4.32193	1.58496	1	0	0	2.58496	4.39232
CSTB	3.80735	5.08746	2.80735	2	4.08746	4.24793	4.16993	4.32193	4.24793	3.80735	4.85798	2.32193	4.32193	2.58496	2	4.75489	0	4.39232	4.08746	4.90689	4.80735	3.70044	3.16993	2.32193	2.58496	3.16993
CSTF2	4.9542	5.61471	3.90689	6.06609	6.50779	5.97728	5.80735	5.9542	5.32193	6.10852	5.61471	6.12928	5.64386	0	6.08746	1	3.80735	2.80735	4.16993	0	5.88264	4.58496	5.58496	4.39232	4.9542	5.52356
CSTF2T	3.16993	4.45943	0	4.16993	5.08746	4.08746	4.9542	4.90689	2.80735	3.80735	3.32193	5.24793	4.16993	0	3.58496	0	2.32193	0	0	0	2.32193	2.32193	3.16993	0	4.24793	3.45943
CSTF3	3.32193	4.52356	3.58496	4.24793	5.78136	5.39232	5.04439	5.39232	5.58496	3.45943	4.85798	4.70044	4	0	0	3.45943	2	2.32193	4.70044	0	4.39232	4.39232	5.08746	5.04439	3.45943	4.58496
CT45A5	0	0	0	0	1.58496	0	0	0	0	0	0	0	0	0	0	0	0	0	0	0	0	0	0	0	0	0
CT83	0	2	0	0	1	0	0	0	0	0	0	0	0	0	0	0	0	0	2.58496	0	0	0	0	0	0	0
CTAGE1	1	6.16993	3.45943	5.45943	5.75489	5.75489	6.10852	4.52356	4	0	5.20945	3.45943	2.58496	0	0	3	0	2.80735	3.45943	2	3.70044	3.32193	3	3.80735	4.64386	2.80735
CTAGE15	0	4.32193	4.08746	0	3.58496	0	0	1	0	2.58496	2.32193	0	0	0	0	0	0	0	0	0	0	3.58496	0	4.32193	0	0
CTAGE3P	0	1	2	1.58496	1	2.80735	2.32193	0	0	0	0	1	0	0	0	0	0	1	0	0	0	0	0	0	0	0
CTAGE4	0	5.35755	4	3.32193	4.39232	3.58496	4.24793	3.32193	2.32193	2	3	0	0	0	0	2.32193	1	1.58496	3.32193	0	1.58496	3.32193	2.58496	4.08746	3.58496	0
CTAGE5	3.16993	10.1687	9.42626	10.1662	9.90989	9.74987	10.0607	8.47573	7.85798	7.12928	9.22159	8.41363	6.49185	0	0	6.98868	4.85798	7.2854	7.85798	5.55459	8.48784	7.07682	7.09803	6.35755	9.27146	7.46761
CTAGE6	0	5.61471	4.39232	3.45943	3.80735	3.16993	4.75489	4	0	2.32193	3.70044	1	0	0	0	1.58496	0	0	3.45943	0	1	3.32193	0	4.16993	3.58496	2.58496
CTAGE9	0	4.52356	4.16993	3.70044	4.9542	3.90689	4.52356	1	2.32193	2	3.58496	2.32193	1	0	0	3.32193	0	0	2.80735	0	3.32193	3.45943	1.58496	4.16993	3.70044	2.80735
CTBP1	1.58496	6.96578	4.08746	5.80735	4.16993	6.26679	6.08746	5.75489	4.64386	5.16993	4.64386	4.9542	3	0	3.45943	3.80735	3.70044	3.58496	0	0	2.32193	4.32193	0	0	4.70044	3
CTDNEP1	0	3.32193	0	0	1	0	3.70044	3.16993	0	0	1.58496	0	0	0	0	0	0	0	0	0	0	0	0	0	0	0
CTDSPL2	0	4.39232	1.58496	3.16993	6.10852	3	5.35755	4.80735	2.58496	1.58496	4.52356	3.32193	0	0	0	0	0	0	0	0	0	0	0	0	3.32193	2.80735
CTHRC1	0	0	0	0	1.58496	0	0	0	0	0	0	0	0	0	0	0	1.58496	0	0	0	0	0	0	0	0	0
CTNNA1	8.90087	6.14975	6.72792	7.06609	6.88264	9.45738	11.0147	10.6348	8.81057	10.6987	9.85331	9.22882	9.10852	1.58496	3.80735	6.30378	3.32193	5.2854	7.86419	9.60363	8.61839	9.03617	9.37938	7.96578	6.78136	9.73978
CTNNA2	3.80735	0	5	2	1	6.71425	7.59991	7.75489	4.16993	7.41785	6.71425	6.37504	6	0	0	0	3.45943	0	4	5.72792	3	6.04439	5.16993	0	3.32193	7.12928
CTNNA3	3.32193	3.58496	0	0	3.70044	3	4.24793	4.16993	2.32193	3.80735	3.80735	2	0	3.58496	2	0	0	0	0	1	0	3.45943	3	2.80735	0	2
CTNNAL1	0	0	0	0	4.24793	1	0	0	0	0	0	0	0	0	0	0	0	0	0	0	0	0	0	0	0	0
CTNNB1	8.05528	0	5.32193	4.80735	7.40088	8.44708	8.93369	8.66178	6.91886	8.45533	7.74147	7.56986	7.08746	0	0	0	0	1	5.70044	7.79442	6.75489	7.58496	6.9542	6.04439	6.35755	8.15482
CTNNBIP1	0	0	0	0	0	0	1.58496	0	0	2	0	0	0	0	0	0	0	0	0	0	0	0	0	0	0	0
CTNNBL1	0	6.37504	3.80735	5.2854	6.26679	7.06609	8	7.05528	5.24793	6.24793	6.44294	6.40939	5.90689	1.58496	0	2.32193	0	1	2.58496	3.16993	0	4	5.08746	3.90689	6.22882	6.02237
CTNND1	8.3837	9.15228	6.35755	6.70044	8	9.79928	10.9396	10.5812	6.87036	10	9.53528	9.69	8.67596	0	4.75489	6.35755	4.32193	5.12928	8.15482	7.8009	7.15987	8.93369	8.50383	7.56986	8.01681	8.86728
CTSA	2.80735	6.16993	5.39232	5.49185	5.24793	5.45943	4.52356	6.02237	5.49185	4	5.2854	2.58496	4.32193	0	0	4.45943	4.58496	5.24793	0	0	3.90689	3.58496	3	2.80735	5.32193	5.32193
CTSB	7.27612	9.18735	9.11374	4.80735	9.77314	7.17991	8.15987	8.8009	6.96578	7.61471	8.03892	5.97728	6.33985	4.16993	6.18982	8.29002	7.76818	8.15482	6.52356	7.9542	4.9542	7.03342	4.70044	5.55459	7.56986	7.05528
CTSC	0	7.54689	6.64386	0	0	5.9542	6.02237	8.02791	4.64386	5.32193	7.24793	3.80735	4.45943	2.80735	2.32193	5.9542	5.88264	5.39232	0	3.80735	0	0	0	4.75489	6.64386	7.43463
CTSD	8.84862	10.115	9.85019	9.36851	9.39446	9.80252	9.98442	10.1861	8.43045	9.15482	10.2288	8.60363	10.0634	6.14975	7.08746	9.45121	9.72281	9.13443	10.0512	9.12153	8.9571	8.38802	7.24793	7.61471	9.37287	10.2444
CTSE	0	0	0	4.24793	4.58496	4.85798	5.42626	4.9542	0	0	6.75489	6.80735	2	0	0	0	0	0	0	5.20945	0	0	0	0	3.70044	0
CTSG	7.50779	6.12928	3.70044	2.80735	4.64386	0	3.70044	1.58496	3.16993	0	2	0	4.39232	6.35755	6.04439	1.58496	0	5.12928	4.45943	2	5.55459	2.32193	5.24793	0	2	2
CTSH	5.35755	7.2854	6.12928	5.32193	3	6.42626	5.90689	7.43463	7.2384	5	5.80735	4.58496	5.85798	4.52356	3.58496	5.42626	5.04439	5.24793	4.45943	5.75489	5.20945	4.45943	3	3.16993	5.75489	5.58496
CTSL	0	3.16993	5.35755	0	3	0	0	4.24793	0	2.80735	2.32193	3.58496	2.32193	0	0	3.16993	3.90689	0	0	1.58496	0	0	0	0	3.45943	3.16993
CTSZ	0	7.30378	6.61471	3.58496	4.24793	5.12928	5.24793	6.6865	4.24793	5.12928	4.32193	3.45943	5.04439	0	4.08746	5.49185	5.16993	6.02237	0	3.45943	0	0	0	0	5.24793	4.80735
CTTN	1.58496	0	3.32193	8.02237	4.75489	6.74147	7.11894	7.15987	3.80735	7.74147	8.80413	7.59991	7.62205	0	0	0	0	0	5.70044	5.75489	4.32193	6.56986	3.90689	4	6.40939	6.55459
CTTNBP2	0	4.85798	0	0	3.32193	0	0	0	0	0	0	0	0	0	0	0	0	0	0	0	0	0	0	0	3.45943	2.32193
CUEDC1	0	0	0	0	0	0	0	0	0	0	0	0	0	0	0	0	0	0	0	0	0	0	0	0	0	0
CUL2	5.20945	6.88264	6.16993	5.72792	6.56986	5.9542	6.82018	6.33985	4.9542	4.16993	5.55459	5	3.45943	0	0	3.70044	3.80735	5.39232	5.45943	5.42626	5.20945	4.24793	5.72792	0	6.33985	5.20945
CUL4A	5.04439	5.83289	4.16993	7.29462	7.45121	7.48382	7.15987	6.65821	5.64386	5	5.72792	4.08746	5.32193	3.90689	0	3.32193	3.80735	3.80735	5.04439	4.85798	5.75489	4.16993	4.24793	6.40939	5.93074	5.2854
CUL4B	4.24793	7.8392	5.04439	7.31288	9.5411	7.89482	7.58496	7.74147	4.45943	6.24793	7.29462	6.94251	6.37504	3	0	5.20945	5	6.16993	6.40939	5.85798	6.74147	5.83289	5.88264	7.45121	7.46761	6.56986
CUL5	0	5.61471	0	3.45943	4.80735	4.16993	5.80735	4.16993	3.32193	3.80735	5.12928	3.45943	3.80735	0	0	0	0	0	0	3.58496	0	0	0	3.16993	4.58496	0
CUL9	4.52356	0	0	0	3.80735	0	5.39232	0	0	0	0	0	0	0	0	0	0	0	0	0	0	0	0	0	0	0
CUTA	0	4.80735	3.32193	5	3.80735	3.58496	5.16993	4.80735	2.32193	5.2854	4.16993	4.52356	4.70044	0	2	1	3.58496	0	3.45943	0	2	3.45943	1.58496	0	4.45943	4.39232
CUX1	0	5.55459	2.58496	5.52356	3.80735	6.37504	5.55459	8.3837	5.85798	0	5.55459	6.55459	7.43463	0	0	0	5.55459	5.39232	5.85798	2.32193	0	0	0	6.76818	2	7.13955
CWC15	0	3.45943	1	2	2.80735	2.80735	3.45943	2.32193	0	2	2.32193	2	2	0	1	2.32193	0	1.58496	0	0	0	1	1	0	2.58496	1
CWC22	0	0	0	0	3.16993	0	0	0	0	0	1	0	0	0	0	0	1	0	0	0	0	0	0	0	0	0
CWC27	0	2.58496	0	2.32193	3	4.08746	5.9542	5.52356	2.32193	4.52356	5.08746	4.39232	3	0	0	0	0	0	0	0	0	0	0	0	0	3.16993
CXADR	4.85798	6.20945	3.90689	1	6.42626	6.53916	7.31288	6.97728	4.64386	5.55459	6.44294	5.83289	5	0	1	1.58496	0	0	2.80735	7.34873	0	0	3.70044	2	7.06609	5.39232
CXCL12	0	0	0	0	0	0	0	0	0	0	0	0	0	0	0	0	0	0	0	0	0	0	0	0	0	0
CXCR2	0	2	0	0	0	0	1	0	0	0	0	0	0	0	0	0	0	0	0	0	0	0	0	0	0	0
CXorf21	0	1.58496	0	0	2	0	0	0	0	0	0	0	0	0	0	0	0	0	0	0	0	0	0	0	0	0
CXorf38	0	0	0	0	0	2.32193	0	1.58496	1	0	0	0	0	0	0	2.32193	0	1	0	0	0	0	0	0	0	0
CXorf67	0	0	0	0	2.32193	0	0	0	0	0	0	0	0	0	0	0	0	0	0	0	0	0	0	0	0	0
CXXC5	0	0	0	1	1.58496	0	0	0	1.58496	0	0	0	0	0	0	0	0	0	4	0	3	1	0	0	0	0
CYB5A	6.53916	5.39232	3.16993	6.62936	5.04439	5.93074	7.24793	5.2854	3.32193	5.42626	6.91886	5.83289	5.97728	0	1.58496	4.70044	3.45943	5.2854	6.56986	6.98868	5.42626	5.83289	5.97728	4.64386	5.04439	6.16993
CYB5B	7.08746	7.59991	6.56986	6.61471	7.43463	6.88264	7.75489	7.15987	6.89482	6.87036	7.29462	7.33985	6.45943	4.85798	4.24793	5.08746	6.04439	5.64386	5.78136	5.85798	6.37504	6.83289	6.24793	6.78136	6.52356	7
CYB5R1	3	6.67243	4.85798	7.29462	5.97728	5.45943	5.61471	5.39232	1.58496	0	4.9542	5.93074	5.39232	0	0	3.32193	4.24793	3.16993	7.20945	4.08746	1.58496	3.45943	3.45943	0	5.80735	5.88264
CYB5R3	5	8.27146	8.01681	7.48382	7.94251	8.47168	8.56224	6.85798	6.82018	7.09803	7.88874	6.97728	5.90689	4.39232	3.45943	6.39232	4.39232	5.83289	5.12928	6	5.55459	7.06609	5.80735	4.80735	7.05528	7.22882
CYBA	4.08746	5	3.58496	2.58496	2	4.32193	3.70044	4.32193	5.16993	2.32193	3.32193	4	4	5	3.90689	0	3.16993	3.90689	2.58496	3.32193	2.32193	0	3.16993	0	5.12928	2.32193
CYBRD1	1.58496	3.45943	1	2.58496	3.16993	3.16993	2	2	1.58496	1.58496	1	3.70044	1.58496	2	1.58496	0	0	1.58496	1	0	1	0	0	0	0	0
CYC1	5.67243	6.22882	5.24793	5.32193	7.37504	6.35755	6.90689	6.59991	5.90689	6.45943	6.50779	6.10852	5.9542	2.80735	4.08746	3.90689	4.16993	4.16993	6.53916	5.24793	4.45943	3.32193	3.90689	4.52356	6.24793	5.55459
CYCS	5.20945	5.97728	5.45943	5.55459	8.04439	6.67243	6.79442	6.84549	6.58496	6.32193	6.02237	5.75489	4.9542	4.9542	3.45943	4.58496	3	4.52356	6.14975	6.42626	6.33985	3.90689	4.52356	0	5.45943	5.32193
CYFIP1	7.62936	10.2668	8.60363	7.74147	7.59991	8.79766	9.39017	8.75154	8.24793	8.03892	8.32193	5.39232	6.49185	0	0	7.75489	8.41363	7.53916	6.93074	7.59246	7.11894	6.22882	6.50779	6.76818	8.61839	7.62936
CYFIP2	5.72792	9.85798	7.77479	6.49185	6.65821	7.96	8.83605	7.98868	6.72792	7.08746	7.47573	4.70044	5.64386	0	1.58496	7.30378	7.67948	6.9542	6.40939	7.03342	5.55459	6.37504	5.2854	6.50779	7.71425	6.26679
CYP17A1	0	0	0	0	5.80735	0	0	0	0	0	0	0	0	0	0	0	0	0	0	0	0	0	0	0	0	0
CYP20A1	3.45943	8.37938	7.30378	5.35755	7.58496	7.43463	8.07682	7.56986	6.79442	5.90689	6.45943	1.58496	0	2.58496	0	5.75489	4.58496	5.12928	0	4	4.64386	5.35755	4.75489	5.04439	7.83289	5.75489
CYP27A1	0	8.55459	6.83289	2.80735	5.49185	3.80735	6.76818	5.32193	1	4.08746	5.16993	1	4.16993	0	0	4.80735	5.45943	4.16993	3.45943	1.58496	0	2.58496	3.16993	1	5.32193	4
CYP2A13	0	0	0	0	0	0	0	0	0	0	0	0	0	0	0	0	0	0	0	0	0	0	0	0	0	0
CYP2F1	0	0	0	0	1.58496	0	0	0	0	0	0	0	0	0	0	2.58496	0	0	0	0	0	0	0	0	0	1.58496
CYP2S1	6.30378	6.32193	6.94251	4.90689	9.35755	8.94837	8.89178	6.24793	6.04439	7.12928	8.66534	6.35755	5.9542	1.58496	0	4.24793	4.24793	3.80735	3.80735	7.13955	6	3.45943	5.61471	5.55459	6.88264	6.93074
CYP3A4	0	0	0	0	3.16993	0	4.32193	3.16993	0	0	5.88264	1	0	0	0	0	0	0	0	1.58496	0	0	0	0	0	0
CYP3A5	0	0	0	0	4.58496	3.32193	5.32193	4.39232	0	0	7.05528	2.32193	0	0	0	0	0	0	0	0	0	0	0	0	0	2.58496
CYP3A7	0	0	0	0	3.70044	0	3.32193	1	0	0	4.75489	3.16993	0	0	0	0	0	0	0	0	0	0	0	0	0	1.58496
CYP4F11	0	0	0	3.32193	7.55459	5.52356	5.9542	4.52356	1	1.58496	6.90689	0	0	1.58496	1	0	0	2.80735	4.75489	3.45943	7.40088	6.53916	3.16993	0	1.58496	0
CYP4F12	1.58496	0	0	0	6.20945	4.75489	7.7211	3.90689	2.32193	4.16993	7.56224	0	3.58496	3.45943	0	0	0	1	4.32193	2.80735	5.67243	4.90689	1	0	3.16993	0
CYP4F2	1	0	0	2	5.52356	3	6.20945	2.80735	4.08746	2.32193	6.96578	0	0	0	1	1.58496	0	2.32193	2.80735	2.80735	5.83289	5.42626	2.80735	0	2	0
CYP4F3	3.80735	0	0	0	6.33985	5.24793	7.33092	4.58496	6	3.70044	7.44294	0	2.32193	5.55459	1.58496	3.32193	0	4.64386	2.80735	4.24793	6.88264	6.52356	3.45943	0	3.16993	0
CYP51A1	2.80735	3.32193	4.58496	7.20945	6.62936	0	6.89482	5.83289	3.70044	4.9542	6.78136	5.58496	1	0	0	0	0	4.24793	0	3.16993	2.80735	2	0	6.88264	7.31288	7.8392
CYTH2	0	0	0	3.58496	2.80735	0	4.24793	2.58496	0	0	3.58496	0	0	3.45943	0	0	0	0	0	1.58496	3.45943	0	0	0	1	0
DAB2IP	0	0	0	0	2	2	3.32193	3.32193	0	0	0	0	2.32193	0	0	0	0	0	0	0	0	0	0	0	0	0
DACT1	0	0	0	0	2.58496	0	4.24793	3.70044	0	4.58496	1.58496	0	0	0	0	0	0	0	3.32193	0	0	0	0	0	0	0
DACT3	0	0	0	0	3.32193	0	0	0	0	0	0	0	0	0	0	0	0	0	0	0	0	0	0	0	0	0
DAD1	5.42626	6.74147	5.64386	5.12928	5.85798	5.78136	5.52356	5.80735	5.52356	4.52356	4.80735	4.85798	5.61471	4.70044	1.58496	5.16993	4.80735	4.52356	5.12928	5.45943	4.9542	3.80735	4.58496	4.39232	5.97728	5.45943
DAGLB	0	6.20945	3.32193	0	3.16993	4.39232	0	2.80735	3.70044	1.58496	0	0	0	1	0	4.08746	2.32193	4.70044	3.16993	2.32193	3.80735	0	0	2.32193	3.45943	0
DAP	0	2.80735	0	0	3.70044	2.32193	4.64386	0	0	0	0	0	0	0	0	1	0	0	0	0	0	0	0	0	0	0
DAP3	2.32193	6.33985	3.16993	0	4.75489	6.18982	6.08746	7.06609	2.80735	4.75489	5.61471	3	2.80735	0	3.58496	4.75489	2.80735	0	3.16993	0	3.32193	3.32193	3.45943	2.80735	5.61471	6
DAPL1	0	0	0	0	1	0	0	0	0	0	0	0	0	0	0	0	0	0	1	0	0	0	0	0	0	0
DARS	6.78136	7.54689	6.08746	8.97441	8.34873	8.50383	8.41785	7.74147	7.59991	5.55459	7.43463	8.0607	7.70736	4.24793	5.49185	4.90689	6.04439	5.42626	7.26679	3.45943	5.04439	5.55459	5.90689	7	7.27612	7.6865
DARS2	0	5.12928	0	6.16993	5.39232	6.02237	4.52356	6.2854	6.37504	3.58496	5.88264	5.70044	5.49185	0	2.80735	0	3.16993	2	3.32193	0	0	2.58496	3.32193	3.80735	4.80735	4.70044
DAZAP1	4.58496	5.75489	4.90689	5.64386	5.20945	4.80735	6.42626	5.97728	4.39232	4.70044	5.49185	5.39232	5.08746	3.58496	3.58496	3.45943	2.58496	4.24793	3.45943	3.16993	4.90689	4.75489	2.80735	0	4.85798	5.35755
DAZAP2	0	0	0	1	0	0	0	1	0	0	2.58496	1.58496	0	0	0	0	0	0	0	0	0	0	0	0	1.58496	0
DBI	1.58496	6	0	3.58496	3.32193	2.32193	5.83289	3.70044	0	3.58496	2.32193	1	1.58496	4.58496	1	5.52356	1	5.39232	3.80735	5.52356	5.24793	6.35755	5.32193	0	1.58496	4
DBN1	0	3	0	0	4.08746	0	1	0	0	6.20945	0	4.64386	4.32193	0	4.64386	0	0	0	3.90689	0	3	6.39232	5.2854	3.16993	0	0
DBNDD1	0	0	0	0	0	0	0	0	0	0	0	0	1	0	0	0	0	0	0	0	0	0	0	0	0	1
DBNL	7.87652	10.0389	8.67596	8.99718	8.22882	7.88264	8.37504	8.5812	5.80735	8.7211	8.56224	8.84862	8.31288	5.35755	8.10852	8.31288	6.93074	7.13955	6.88264	7.17991	0	6.83289	5.67243	3.32193	7.79442	6.91886
DBT	0	2.58496	0	3.16993	5	5.08746	5.12928	4.08746	3.32193	0	0	3.58496	4.16993	0	0	2.32193	2	2.32193	5.67243	0	3.58496	3.58496	2.58496	2	3.90689	4.85798
DCAF12	0	0	0	0	2.32193	0	0	0	0	0	0	0	0	0	0	0	0	0	0	0	0	0	0	0	0	0
DCAF13	0	0	0	1.58496	3.32193	0	2.80735	0	0	0	0	0	0	0	0	0	1	2.32193	0	0	0	0	0	0	0	0
DCAKD	0	2.58496	2	1.58496	2.32193	3	5.08746	4.45943	1	3.80735	4.08746	1	0	0	0	0	0	1	0	2.58496	2	1	0	0	3	2
DCC	0	5.42626	0	0	4.32193	3.45943	0	1	0	0	0	0	3.80735	0	0	0	0	3.16993	0	0	0	0	0	5.32193	0	0
DCDC2	0	3.45943	0	0	2.32193	0	0	0	0	0	0	0	0	0	0	0	0	0	1.58496	0	0	0	0	0	0	0
DCK	0	3	2.58496	0	1	2	1.58496	1.58496	3	0	0	0	0	0	0	0	0	0	0	0	0	0	0	0	3.45943	0
DCLRE1C	0	4.08746	0	0	4.85798	1.58496	0	3.80735	3	0	3.16993	0	0	0	0	0	0	0	0	2	3.45943	0	0	0	0	3.45943
DCPS	2.32193	5.08746	3.70044	3.32193	2.32193	3.90689	4.52356	4.16993	3.58496	4.16993	3.80735	3.70044	3.70044	0	4	2	3	0	3.32193	1	1.58496	2.58496	2	3.58496	3.90689	3.32193
DCTD	0	0	0	0	1	3.80735	0	1.58496	0	0	0	0	2	0	0	0	0	0	0	0	0	0	0	0	3	0
DCTN1	4.80735	9.35315	8.03892	8.75154	7.61471	7.01123	8.65464	8.14975	6.12928	6.72792	7.40939	6.82018	6.16993	7.19967	4.85798	4.80735	4.9542	7.33985	5.2854	5.08746	4.85798	2.58496	4.24793	3.58496	7.49985	6.30378
DCTN2	3.32193	8.24317	6.96578	7.8392	7.19967	7.44294	6.33985	7.31288	7.58496	6.75489	6.04439	7.05528	7.03342	3.16993	4.9542	6.35755	6.04439	6.85798	5.67243	5.78136	3.90689	4.24793	5.55459	4.90689	7.04439	7.36632
DCTN3	0	4.45943	3.80735	4.58496	3.32193	4.52356	3.90689	5.52356	0	0	4.16993	3.58496	3.70044	0	2.58496	0	1	3	0	0	0	0	0	0	3.70044	2
DCTPP1	5	2.32193	0	6.12928	3.58496	6.14975	5.93074	5.72792	4.24793	6.47573	5.39232	4.70044	5.55459	0	2.32193	1.58496	1	0	1.58496	2	3	2.32193	0	3.16993	4.70044	5.90689
DCUN1D1	5	4.52356	1.58496	4.45943	3.45943	4.64386	4.16993	4.08746	3.16993	3	2	1.58496	3.16993	0	0	2.80735	0	2.80735	0	0	3.58496	2.80735	2.80735	0	4.80735	3.32193
DCUN1D4	0	0	0	0	0	1	0	0	0	0	0	0	0	0	0	0	0	0	0	0	0	0	0	0	1	0
DCXR	2.58496	6.59991	6.22882	5.45943	7.08746	8.53138	7	7.31288	4	5.9542	7.56986	5.75489	6.44294	0	2.32193	3.45943	4.45943	0	5.35755	7.09803	3.70044	2.80735	2.58496	0	7.54689	6.32193
DDAH1	4.52356	0	0	6.02237	1	7.24793	6.75489	5.32193	3.16993	7.02237	6.12928	5.55459	6.30378	1.58496	0	0	0	0	4.16993	1.58496	2.58496	3.90689	1.58496	0	7.02237	3.70044
DDAH2	0	6.24793	3.16993	5.16993	4.75489	1.58496	6.20945	5.64386	2.32193	5.2854	4.58496	4.64386	5.08746	0	4.45943	3.90689	4.75489	0	2.58496	0	2.58496	5.12928	2.58496	3.90689	5.16993	3.70044
DDB1	7.15987	8.93074	5.45943	7.78136	8.46761	8.84862	8.06609	8.9571	8.12928	7.30378	7.70044	7.55459	5.90689	3.70044	4.75489	5.61471	6.32193	5.20945	5.88264	3.58496	7.78136	7.3837	6.24793	7.10852	8.49586	7.88264
DDC	0	3	0	1	5.04439	5.45943	2.58496	0	0	2.58496	0	0	0	0	0	0	0	0	0	0	0	2.32193	0	0	6.55459	0
DDHD2	0	2.32193	0	0	2.32193	4.16993	4	0	0	3.58496	0	0	1	0	0	0	0	0	0	0	3	0	0	0	0	0
DDI2	4.08746	3.16993	0	4.32193	3.58496	1.58496	4.39232	3	2	2.32193	3.32193	2.80735	0	2.32193	3.16993	1.58496	2	3.45943	0	0	5.49185	3	1.58496	1	4	0
DDOST	7.87036	8.76487	7.48382	8.09803	8.7879	8.78463	8.82655	8.64746	8.60733	7.75489	8.49185	8.26209	8.02791	4.52356	6.62936	8.04985	7	8.18488	8.98299	7.13955	8.01681	8.22882	8.224	8.02791	8.84235	8.82655
DDRGK1	3.90689	5.90689	6.08746	6.45943	7.16993	6.33985	7.45121	6.79442	5.39232	6	6.12928	6.2854	6.50779	0	0	4.58496	2.58496	4.64386	5.85798	5.45943	4.16993	5.20945	3.58496	5.16993	5.52356	4.70044
DDT	5.83289	5.04439	3.16993	4.64386	4.90689	7	4.64386	3.58496	5.08746	4.85798	4.90689	0	3.16993	2.32193	1	3	3.32193	3.32193	3.45943	3.16993	4.64386	0	3.16993	3.80735	5.52356	4.58496
DDTL	3.45943	3.58496	2	3	3.70044	4.52356	0	2	0	0	3.58496	0	2	0	0	0	0	0	0	0	0	0	0	0	3.90689	3.45943
DDX1	7.91289	8.23362	7.61471	8.36194	8.91886	8.51175	9.1472	9.12153	8.26209	7.07682	7.59991	8.53916	7.06609	4.90689	6.39232	5.32193	4.32193	5	5.75489	4.32193	6.04439	6.90689	6.49185	6.78136	6.87036	6.59991
DDX11L8	0	0	0	2	1.58496	0	0	0	0	0	0	0	0	0	0	1.58496	0	0	0	0	0	1.58496	0	0	0	0
DDX12P	0	0	0	0	1	0	0	0	0	0	0	0	0	0	0	0	0	0	0	0	0	0	0	0	0	0
DDX17	7.59246	9.28771	8.26679	8.99718	9.11114	9.50383	8.9629	9.52552	8.04439	7.07682	8	9.1267	8.72451	4	8.01123	7.88264	7.22882	7.81378	7.82655	6.30378	7.3837	8.48382	8.18982	7.8392	8.47978	8.03342
DDX18	4.9542	4.16993	1	4	7.56224	4.16993	7.94837	2.58496	6.12928	3.70044	3.45943	4.9542	4.52356	0	3.32193	3.58496	3.32193	3.70044	4.9542	2.58496	4.45943	3.70044	4.70044	4.16993	2.32193	4.08746
DDX20	4.70044	4	2	4.39232	4.45943	2	4.80735	3.58496	3.45943	2.32193	0	4.24793	2.58496	0	1	0	0	0	3.80735	0	3.58496	3.80735	3.58496	3.45943	4.85798	1.58496
DDX21	6.18982	0	4	4.32193	9.02791	5.64386	8.97154	6.97728	5.78136	4.75489	5.67243	7.2384	4.75489	0	2.80735	4.52356	0	0	3.58496	2.80735	0	3.70044	5.24793	6.47573	3.80735	5.67243
DDX23	2.32193	4.58496	0	4.52356	5.88264	5.64386	4.45943	5.39232	5.24793	0	4.52356	5.04439	3.90689	0	2.32193	0	0	3.16993	4.08746	0	2.80735	4.24793	3.16993	3.32193	3.80735	3.58496
DDX24	0	2	0	0	6	0	5.58496	0	0	0	0	0	0	0	0	0	0	3	0	0	2.80735	3.32193	0	0	0	0
DDX25	1.58496	0	0	1	2.80735	3.45943	5.24793	2.32193	2.32193	0	0	1.58496	0	0	0	0	0	0	0	0	0	0	0	0	1.58496	2
DDX27	4.45943	0	2	3.90689	6.9542	4.32193	6.42626	1.58496	4.70044	3.45943	4.64386	5.16993	2.80735	0	0	3.32193	2.58496	0	1.58496	1.58496	4.80735	1.58496	4.52356	0	0	4.08746
DDX39A	7.79442	8.93664	7.93664	8.64024	8.65821	9.25503	9.55842	8.99152	8.71081	7.79442	8.0607	8.85175	7.60733	4.08746	7.01123	6.94251	7.59246	6.62936	7.41785	6.26679	6.22882	7.14975	7.43463	7.40088	8.55842	9.13955
DDX39B	9.20212	11.2082	9.96	10.8494	10.445	11.2912	11.4466	10.809	10.0954	10.3197	10.268	10.6402	9.83605	5.04439	8.01681	9.36194	9.64926	9.06878	9.90087	8.65464	8.46761	9.69523	9.29462	9.71425	10.5488	9.85019
DDX3X	8.64746	9.1472	8.33539	8.25267	8.90388	8.5812	9.81218	9.10329	8.52356	6.37504	8.40514	8.31288	7.49185	6.26679	6.78136	8.14466	6.53916	7.14975	7.60733	5.93074	8.23362	7.45121	7.53916	8.43879	8.08215	8.10329
DDX3Y	7.42626	7.15987	7.26679	6.10852	7.49985	7.07682	8.20945	7.49185	7.21917	4.45943	6.6865	6.14975	5.35755	5.24793	5.67243	6.02237	5.24793	5.64386	6.18982	4	6.37504	5.72792	6.49185	6.87036	5.9542	6.56986
DDX4	0	0	2.58496	3.45943	4.08746	0	1	3.80735	4.85798	0	0	2	0	0	1	4	2	4.58496	0	0	0	0	0	2	1	2.32193
DDX46	0	6.91886	0	5.58496	5.75489	7.33985	6.62936	6.20945	6.59991	0	6.04439	5.80735	6.16993	0	3.16993	5.04439	4	5.2854	5.97728	0	0	5.80735	3.32193	5.61471	6.16993	5.39232
DDX47	4.52356	4	2.32193	3.16993	6.83289	4.52356	5.42626	5.12928	3.80735	3	2.58496	6.18982	4.75489	0	1	0	2.58496	0	3.80735	0	2	3.80735	3.45943	4.58496	5.12928	6.08746
DDX49	1	0	0	0	3.16993	2.32193	4.39232	2.80735	0	0	0	3	0	0	2.32193	0	0	0	2.58496	0	0	0	0	0	1	2.32193
DDX5	7.87652	8.86419	7.85798	8.61471	9.56224	9.56415	9.50779	8.85487	8.85798	6.62936	8.11374	9.07414	8.38802	3.80735	7.72792	8.05528	6.87036	7.16993	7.76818	6.32193	7.10852	7.90087	8.49985	8.97154	8.25739	8.13955
DDX50	4.16993	3.58496	1.58496	2.80735	6.16993	3.80735	6.90689	5.32193	2.32193	1.58496	3.45943	3.70044	3.16993	0	3	0	0	0	2	0	0	0	4.39232	2	0	4.75489
DDX52	2.58496	0	0	0	4.70044	3	3.90689	0	2	0	0	0	2	0	0	0	0	0	0	0	0	0	2.32193	4.24793	0	1
DDX54	0	1.58496	0	0	5.75489	2.32193	5.42626	0	0	3.16993	0	0	0	0	1.58496	0	0	0	0	0	0	0	4.08746	4.24793	0	0
DDX55	0	0	1	2	0	1	3.80735	0	2.58496	0	0	1	0	0	0	0	0	0	0	0	0	0	3.45943	2.58496	0	0
DDX56	2.80735	1	1	4.08746	7.15987	0	6.67243	4.80735	2.80735	5.90689	4.52356	4.80735	2.58496	0	0	0	0	0	2.32193	2	0	3.45943	0	4.70044	2.32193	4.24793
DDX6	5.64386	7.43463	6.16993	6.72792	6.85798	7.03342	7.43463	6.53916	6.12928	6.50779	6.56986	7.15987	5.70044	3.16993	3.32193	5.78136	4.52356	5.2854	4.32193	5.12928	4.24793	5.49185	4.08746	3.70044	6.65821	6.44294
DDX60	1	5.80735	5.2854	0	3.58496	5.49185	6.04439	0	0	0	0	0	4.85798	0	1	2.32193	2	4.32193	0	0	0	0	0	0	1	0
DEAF1	0	0	0	0	0	0	0	0	0	0	0	0	0	0	0	0	1	0	0	0	0	0	0	1	0	1.58496
DEC1	0	0	0	0	0	0	0	0	0	0	0	0	0	0	0	0	0	0	0	0	0	0	0	0	0	0
DECR1	6.08746	8.73809	8.47168	7.01123	8.37938	8.41785	8.37504	8.31288	7.39232	8.74819	8.01123	6.78136	8.2384	0	5.78136	7.06609	6.79442	6.52356	6.9542	8.2384	6.33985	6.30378	5.35755	4.70044	7.97154	9.52748
DECR2	2.32193	2	0	0	4.75489	5.93074	4.58496	4.90689	1	3.45943	4.16993	0	3.32193	0	0	0	0	0	0	0	0	0	0	0	0	0
DEFA3	7.27612	5.78136	4.70044	4.85798	4	5.93074	5.04439	2.58496	6.89482	2.32193	0	4.45943	5.32193	6.22882	6.02237	5.72792	2.80735	6.6865	5.49185	2.58496	6.59991	5.80735	6.10852	5.16993	0	0
DEFB115	0	0	0	0	0	0	0	0	0	0	0	0	0	0	0	0	0	0	0	0	0	0	0	0	0	0
DEGS1	0	2	4.08746	4.39232	2.32193	5	2.32193	3.45943	3.16993	0	2.32193	2.32193	2.80735	0	1	0	3.32193	2.58496	2.32193	0	0	0	0	0	3.16993	3
DEK	4.08746	6.44294	4.85798	5.70044	5.75489	5.42626	6.37504	7.66534	3.80735	5.64386	5.93074	6.20945	5.35755	0	4.45943	5.97728	4.08746	4.9542	4.80735	4.16993	0	5	4.90689	2.32193	4.85798	6.08746
DENND1A	0	2.32193	0	0	3.45943	3	1.58496	0	0	0	0	0	0	0	0	0	0	0	0	0	0	0	0	0	0	0
DENND1C	0	4.64386	0	0	3.16993	0	0	0	0	0	0	0	0	0	2	0	0	0	0	0	0	0	0	0	0	0
DENND2A	0	3	0	0	2	0	0	0	0	0	0	0	2.58496	0	0	0	0	0	2.58496	0	0	0	0	0	0	0
DENND3	0	6.16993	3.90689	0	4.52356	0	0	0	0	0	0	0	0	0	0	0	0	0	0	0	0	0	2	4.39232	4	1
DENND4C	0	6.06609	5.04439	0	3.45943	7.35755	7.67948	4.90689	0	5.24793	5.2854	0	0	0	4.58496	0	0	3.58496	4.9542	0	0	0	0	0	4.70044	0
DENR	0	0	0	3.58496	2.32193	3	3.16993	4.32193	0	0	5.39232	3	2	0	0	0	0	0	0	2.32193	0	1.58496	0	0	1.58496	2.80735
DERA	4.9542	6.74147	4.80735	5.70044	3.16993	6.44294	4.08746	7.09803	6.02237	3.45943	3.80735	5.12928	4.90689	2.80735	3.58496	4.32193	5.88264	3.32193	5.45943	0	1.58496	0	1.58496	0	6.22882	5.24793
DERL1	1	4.58496	4.16993	4.24793	4.52356	5.67243	3.58496	5.64386	5.78136	3.16993	3.45943	3.90689	3.70044	1	2	2.58496	1.58496	4.16993	5.64386	4.45943	3	3.45943	4.39232	5.24793	4.80735	4.80735
DERL2	0	0	1.58496	0	0	3.16993	0	0	1.58496	0	0	0	0	0	0	0	0	1	0	0	0	0	2	3.58496	0	0
DES	5.97728	7.39232	6.14975	4.80735	5.12928	6.71425	6.22882	6.12928	6.72792	3	6.53916	5.04439	4.9542	5.97728	6.71425	5.93074	5.42626	6.87036	4.58496	3.32193	4.32193	4.39232	6.30378	5.04439	5.93074	5.58496
DFFA	3.90689	5.61471	4.32193	4.9542	4.90689	4.64386	3.80735	4.32193	5.55459	5.80735	4.85798	5.88264	5.35755	0	4.24793	4.52356	2.32193	2.32193	1	0	3.80735	5.97728	4.70044	4.52356	5.32193	4.80735
DFFB	0	1.58496	0	0	2	0	0	0	0	0	0	0	0	0	0	0	0	1.58496	0	0	0	0	0	0	0	0
DFNA5	0	4.58496	3	1.58496	1	0	0	3.45943	0	0	3.16993	0	2.80735	0	0	1.58496	3.58496	0	0	0	0	0	0	0	0	0
DGAT1	2.32193	5.61471	0	3	5.24793	4.90689	5.24793	4.80735	1	5.20945	4.80735	0	1	0	0	2.80735	1	2.58496	4.85798	5.12928	3.80735	1.58496	3.16993	3.45943	4.39232	3.45943
DGKA	2.32193	5.04439	3.70044	4	3.58496	2.58496	0	5	0	0	1.58496	0	0	0	1	2.32193	0	0	2	3.70044	0	0	3.80735	0	0	0
DGKB	0	0	0	0	2	0	0	0	0	0	0	0	0	0	0	0	0	0	0	0	0	0	0	0	0	0
DGKD	0	0	0	0	1.58496	0	0	3.32193	0	0	2	0	0	0	0	0	0	1.58496	0	0	0	0	4.32193	0	0	0
DGUOK	3.32193	2.80735	1.58496	0	4.75489	4	2.58496	5.20945	5.45943	0	0	0	1	0	0	0	0	4.64386	0	0	1.58496	0	0	1.58496	0	3
DHCR7	0	3.32193	0	4.80735	3	5.64386	3	4.58496	4.75489	2.80735	3.45943	3.16993	0	2.80735	0	0	0	0	3.16993	0	0	0	0	4.24793	5.24793	3.80735
DHFR	0	0	0	0	0	1	0	0	0	0	0	2.58496	0	0	0	0	0	0	0	0	0	1	0	0	3.16993	0
DHODH	0	2.58496	3.32193	0	4.39232	0	0	5.93074	0	2.32193	3.90689	5.2854	0	0	0	0	0	0	2	0	0	0	0	0	1.58496	4.80735
DHPS	2	1.58496	2.58496	4.58496	5	7.65821	4.90689	4.64386	4.64386	3.90689	0	6.20945	4.32193	0	0	0	2	0	2.32193	0	0	0	0	0	6.14975	4.70044
DHRS3	0	3.45943	0	1	1.58496	4.9542	5.61471	3.80735	1	4.85798	6.02237	1	4.45943	0	0	0	0	0	5.97728	4.85798	0	2.58496	0	0	5.20945	2.32193
DHRS7	5.45943	7.76155	7.96578	6.08746	7.42626	8.2854	5.97728	8.13443	6.91886	7.37504	7.62936	6.88264	7.21917	4.58496	5.08746	4.9542	7.3837	6.94251	8.35315	7.14975	3.80735	5.32193	5.16993	3.58496	8.08746	7.05528
DHRS7B	0	4.52356	3	5.42626	4	5.55459	5.32193	3.32193	0	4.16993	4.75489	6	5.85798	0	0	0	0	0	4.32193	0	0	0	0	0	4.85798	5.42626
DHRS7C	0	0	0	0	2.58496	0	0	0	0	0	3.16993	0	0	0	0	0	0	0	0	0	0	0	0	0	0	0
DHTKD1	0	1	0	6.39232	1.58496	0	0	4.90689	4.32193	0	3.32193	4.52356	2.80735	0	0	0	1	0	2.58496	0	0	0	0	0	0	2.58496
DHX15	6.72792	7	5.75489	7.3837	7.74147	7.30378	7.45943	7.12928	7.34873	4.9542	7.20945	7.26679	6.20945	3.16993	5.32193	5.16993	5.16993	5.45943	7.14975	3.80735	6.16993	6.24793	6.42626	6.80735	7.03342	6.64386
DHX33	0	0	0	0	0	0	0	3.16993	0	0	0	0	0	0	0	0	0	0	0	0	0	0	0	0	0	0
DHX35	0	0	0	0	1.58496	0	0	0	0	0	0	0	0	0	0	0	0	0	0	0	0	0	0	0	1	0
DHX36	0	1	0	3.80735	5.39232	4.80735	6.2854	5.72792	3.80735	3.70044	4.39232	4.52356	4.52356	0	0	0	0	0	0	0	0	0	0	0	5.45943	5.16993
DHX38	3.58496	5.12928	0	0	3.70044	4.39232	4.58496	4.80735	4.45943	3.32193	2.58496	3.80735	3.80735	0	0	2.80735	3.32193	0	2.58496	0	4.16993	4.75489	0	1	4.45943	2.32193
DHX8	3.32193	4	0	6.14975	4.32193	5.12928	0	5.32193	5.20945	0	4.45943	4.16993	3.32193	0	0	0	0	0	3.45943	0	0	0	5.55459	0	0	0
DHX9	8.40088	9.19229	8.33985	9.31741	10.0014	9.13186	9.18488	9.3837	8.89482	8.47978	8.99435	9.17742	8.40939	4.58496	6.9542	6.78136	7.15987	7.22882	8.56224	6.94251	7.8009	7.87036	8.03892	8.29002	8.56986	8.45533
DIABLO	4.58496	8.11374	6.22882	7.76818	8.20457	8.11894	8.93664	8.13955	6.44294	6.62936	8.47573	6.94251	7.18982	0	0	6.89482	5.32193	5.93074	5.55459	7.05528	6.20945	7.05528	5.45943	6.55459	6.9542	7.59991
DIAPH1	7.74147	9.49785	8.79442	6.70044	8.52356	8.73132	8.89785	7.59246	7.76155	8.36194	7.45121	8.8392	8.9571	0	7.08746	6.42626	6.24793	6.59991	6.6865	6.98868	5.64386	6.02237	6.14975	7.20945	8.06609	7.78136
DIDO1	0	5.16993	3.80735	0	4.75489	0	2	0	0	0	0	4	0	0	0	0	0	0	4.52356	0	0	0	0	0	0	0
DIEXF	2.32193	0	0	0	3.45943	3.16993	3.16993	0	3	0	0	0	0	0	0	0	0	0	0	0	0	4.16993	0	0	0	0
DISC1	0	4	5	5	5.90689	5.08746	3.58496	3.32193	4.70044	0	2.32193	4.80735	3.70044	0	0	0	2.32193	0	0	0	6.16993	1	3.90689	0	2.58496	4.52356
DKC1	2	5.04439	4	5.32193	8.11374	6.56986	7.8009	6.30378	5.80735	3	6.88264	6.42626	5.78136	0	0	4.08746	0	3.32193	6	2.32193	1.58496	4.64386	4.52356	4.90689	4.90689	5
DKFZp313C1541	2.58496	5.2854	4.75489	4.52356	6.42626	5.04439	4.75489	2.58496	4.85798	4.58496	5.08746	4.32193	0	0	0	4.45943	2.32193	4	0	0	4.32193	5.32193	3.45943	4.70044	5.12928	2.32193
DKFZp434B2017	0	3.70044	2.80735	3.45943	4.08746	3	4.58496	2.58496	0	3.32193	4.58496	2.80735	3.58496	0	0	0	0	0	0	3.32193	0	2.58496	0	0	4.24793	0
DKFZp434D199	0	3.16993	0	0	1	3.32193	2.80735	3.58496	1.58496	0	1	0	0	0	2	1	0	0	0	0	0	2.32193	3	0	0	2
DKFZp586I031	0	2.32193	0	2.32193	3.32193	0	2	1	0	0	2	0	2	0	0	0	0	0	0	0	0	0	0	0	0	0
DKFZp686E0752	0	6.83289	5.2854	5.83289	5.49185	3.32193	5.04439	5.52356	4.08746	3.80735	4.80735	4.70044	4	0	0	3	3.16993	4.16993	0	3	0	0	0	0	4.52356	3.58496
DKFZp686F0183	0	0	0	0	1	0	0	0	0	0	0	0	0	0	0	0	0	0	0	0	0	0	0	0	0	0
DKFZp686L22104	0	2	2.80735	4.39232	3	1	4.39232	4.70044	0	4.58496	3.90689	4.08746	3.45943	0	0	0	0	0	2.32193	0	0	0	0	1.58496	3.16993	2.32193
DKFZp761A1822	0	0	0	1.58496	2.32193	2.80735	0	0	0	0	0	2.32193	1	0	0	0	0	0	0	0	0	0	0	0	0	0
DKFZp762C0813	0	0	0	0	2.32193	0	0	0	0	0	0	0	0	0	0	0	0	0	0	0	0	0	0	0	0	0
DKFZp779J2370	0	0	0	0	2.32193	1	1	0	0	0	0	0	0	0	0	0	0	0	1	0	0	0	0	0	0	0
DKFZp779K0837	0	0	0	0	0	0	0	1	0	0	0	0	0	0	0	0	0	0	0	0	0	0	0	0	0	0
DKFZp781D1416	0	5.61471	0	0	4	1.58496	4.52356	5.35755	4.32193	0	0	3.70044	0	0	0	0	2.80735	0	3.58496	0	0	0	0	0	3.16993	0
DLAT	0	5.42626	4.16993	5.12928	8.12412	6.67243	6.47573	7.70044	6.32193	4.58496	6.47573	6.52356	6.45943	0	5.88264	0	3.32193	2.80735	6.35755	3.70044	3.32193	2.58496	3.45943	5.45943	6.53916	7.03342
DLC1	3.32193	4.90689	0	0	2.80735	3.32193	0	0	0	0	0	0	0	0	0	3.80735	3.45943	0	4.32193	0	4.24793	0	0	0	3.45943	0
DLD	6.32193	7.53916	5.39232	5.93074	8.71768	9.14211	7.96578	8.67243	7.21917	7.03342	8.27612	7.29462	7.56224	4.08746	5.88264	5.52356	5.52356	6.74147	6.64386	4.39232	6.67243	4.52356	5.67243	6.42626	7.91886	7.90087
DLG1	0	0	0	4.16993	3.90689	8.89178	7.90087	7.33985	5.04439	7.50779	5.24793	5.08746	4.64386	0	0	0	0	0	3.80735	2.80735	4.45943	0	4.70044	0	5.32193	4.16993
DLG2	0	1	0	1.58496	3	5.64386	0	5	3.32193	2	0	3.80735	0	0	0	0	0	0	0	0	0	0	5.39232	0	1	3.16993
DLG3	1	3.16993	0	5.67243	3.90689	6.16993	7.03342	4.52356	2.58496	0	5.75489	0	0	0	0	0	3	0	0	0	0	3	0	0	0	3.32193
DLST	6.10852	7.45121	5.9542	6.35755	7.76818	7.99435	7.85798	8.16491	7.60733	5.55459	8.45533	8.08215	7.74147	3.45943	5.97728	5.64386	5.85798	5.88264	6.58496	4.85798	5.64386	4.80735	5.58496	5.52356	7.22882	6.93074
DLX5	0	0	0	0	1.58496	0	0	0	0	0	0	0	0	0	0	0	0	0	0	0	0	0	0	0	0	0
DMAP1	0	1	0	0	1	0	2.80735	3.45943	0	0	0	0	0	0	0	0	0	0	3.58496	0	0	0	0	0	2.58496	0
DMD	0	0	0	6.06609	5.64386	0	0	0	5.32193	0	6.79442	0	0	0	0	6.35755	0	6.64386	6.12928	0	0	0	0	0	0	5.16993
DMPK	0	1	0	2	0	0	3.32193	0	0	0	0	0	0	0	0	0	0	0	0	0	0	0	0	0	2.32193	0
DMTN	0	0	0	0	4.16993	0	0	4.24793	1	5.16993	3.45943	2.32193	2.58496	0	0	1	0	2.58496	4.45943	5.75489	1	0	0	0	0	0
DNA2	0	0	0	0	0	0	1	0	0	0	0	0	2.58496	0	0	0	0	0	0	0	0	0	0	0	0	0
DNAAF5	6.16993	4.52356	0	1.58496	8.04985	5.80735	7.99435	6.44294	3.16993	5.58496	0	7.52356	4.52356	0	0	0	0	0	0	1.58496	0	0	5.04439	4.52356	7.13955	0
DNAH7	0	5.20945	0	0	0	0	0	0	0	0	0	0	3.80735	0	0	0	0	0	0	0	0	0	0	0	0	0
DNAJA1	5.04439	5.72792	3.70044	6.06609	6.40939	4.52356	7.34873	5.49185	3.45943	3.58496	4.24793	5.80735	4.70044	0	3.70044	4.58496	4.32193	4.58496	5.45943	1.58496	3	3.80735	3	2	5.55459	4.70044
DNAJA2	0	3.32193	4	4.45943	4.08746	3.58496	5.32193	5.80735	4.64386	4.45943	4.39232	5.39232	4.24793	0	2.32193	3.16993	1.58496	0	4	3	3.70044	1.58496	0	0	5.04439	4.39232
DNAJA3	5.08746	4.08746	0	5.61471	4.80735	5.93074	5.72792	5.08746	4.24793	5.42626	4.64386	4.32193	3.70044	0	2.32193	0	1	0	3.90689	1.58496	5.04439	2.80735	3.90689	5.12928	3.16993	5.42626
DNAJB1	3.80735	6.14975	6.12928	7.10852	6.2854	6.67243	8.01681	7.30378	4.58496	6.58496	6.71425	6.62936	6.47573	0	2.32193	5.35755	3.58496	0	5.04439	4	3.58496	4.64386	2.80735	0	7.11894	7.43463
DNAJB11	4.58496	5.83289	4.75489	3.70044	4	4.39232	5.67243	4.75489	4.58496	4.32193	4.39232	4.58496	4.39232	4.32193	3.80735	3	4.39232	4.52356	4.39232	0	3.90689	0	3.90689	4.39232	4.52356	4.24793
DNAJB12	0	5.08746	0	6.04439	6.88264	3.16993	3.70044	6.74147	0	3.70044	3.58496	6.04439	4.24793	0	0	0	0	3.32193	4.52356	3	0	2.58496	0	0	3.45943	4.75489
DNAJB14	0	2.32193	0	0	3.32193	1.58496	2.32193	2.58496	0	0	2.32193	1.58496	0	0	0	0	0	0	1.58496	0	0	0	0	0	0	3.32193
DNAJB2	0	2.80735	0	0	4.08746	3.16993	1.58496	1.58496	2.58496	1.58496	2	2.32193	1	0	1	0	0	0	3.16993	0	0	0	0	0	1.58496	0
DNAJB4	0	2.32193	0	3.16993	1	3	2.58496	1.58496	0	1.58496	1	1.58496	2.58496	0	0	0	0	0	0	0	0	0	0	2.80735	3.45943	3.32193
DNAJC1	0	3.16993	0	4.70044	3.32193	0	3.90689	2.80735	0	2	4.39232	4.32193	2	0	0	0	0	0	1.58496	1.58496	0	0	0	0	2.80735	0
DNAJC11	0	4	4	2.32193	5.39232	3.32193	6.67243	5.52356	6.08746	0	0	0	4.16993	0	4.16993	0	2.32193	4.32193	0	0	5.78136	5.16993	5.16993	3.16993	2	5.88264
DNAJC13	4.75489	8.47573	6.50779	0	6.12928	6.85798	6.10852	6.47573	4.75489	3.70044	0	0	3.90689	5.49185	0	5.20945	5.70044	6.40939	5.04439	3.90689	5.58496	0	5.61471	5.42626	6.58496	0
DNAJC17	0	3.70044	0	2.32193	1.58496	3.58496	2.58496	4.08746	0	0	3.16993	0	0	0	0	3	0	0	0	0	2.58496	2.80735	2.80735	0	0	0
DNAJC2	2.58496	4.16993	0	0	2.58496	2.80735	5.45943	3.45943	2.58496	0	2	5.64386	0	0	0	0	0	0	0	0	2.32193	0	0	0	4.52356	3.58496
DNAJC24	0	0	0	0	1	0	0	0	0	0	0	0	0	0	0	0	0	1	0	0	0	0	0	0	1	0
DNAJC3	0	5.97728	5.2854	5.93074	3	6.14975	5.64386	4.70044	4.9542	3.32193	4.24793	4.52356	4.39232	0	2.80735	3.16993	0	3.80735	6.50779	0	4	0	3.16993	0	3.80735	2
DNAJC7	4.32193	4.52356	4.45943	1.58496	1.58496	3.90689	6.74147	6.62936	3	0	0	5.90689	6.24793	0	3.16993	2.80735	1.58496	3.70044	0	0	2.32193	3.32193	7.24793	0	5.88264	2.58496
DNAJC8	0	3.80735	5.04439	4.80735	4.80735	4	4.45943	4.85798	3.58496	5.04439	4.64386	4.9542	4.24793	2	4.32193	4.08746	3	4	3	0	3.16993	3	3.32193	0	3.90689	4.52356
DNAJC9	0	4.64386	0	0	3.90689	0	5.08746	5.08746	3.16993	3.32193	3	4	3	1.58496	4.08746	0	2	0	0	2.58496	0	2.58496	2.32193	3.70044	2.32193	3.80735
DNHD1	0	1	0	3.58496	2.80735	0	4.52356	0	3.45943	1.58496	0	0	2	0	0	0	0	0	0	0	0	0	0	0	0	0
DNM1	5.2854	6.18982	3.58496	4.90689	6.72792	8.26209	9.05799	6.04439	6.9542	5.97728	5.61471	6.12928	5.72792	0	4.39232	0	5.08746	0	4.70044	5.08746	0	4.9542	0	0	5.70044	6.61471
DNM1L	6.14975	9.57175	7.49985	10.3399	7.69349	8.55075	10.0375	9.19722	7.96	7.67948	7.71425	9.10852	8.69697	0	5.78136	6.44294	6.90689	5.12928	5.04439	6.47573	7.56986	5.64386	0	0	8.54689	8.91886
DNM2	7.56224	8.63662	7.03342	8.17493	8.33539	10.2009	10.8819	8.21917	8.97154	7.32193	8.87344	8.61471	8.71425	5.24793	6.58496	6.2854	7.32193	7.12928	7.59991	7.26679	7.57743	6.08746	5.24793	4.9542	8.72451	9.42836
DNM3	4.08746	8.01681	6.22882	6.40939	7.40939	8.65821	9.15228	7.21917	6.79442	6.70044	6.47573	6.64386	7.11894	0	4.16993	5.45943	5.55459	4.08746	6.33985	5.12928	5.32193	4.52356	2.58496	5.32193	6.47573	7.2384
DNMT1	0	2.32193	0	6.18982	2.32193	5	8.52748	0	4.75489	0	0	0	0	0	0	0	0	0	0	0	0	0	0	0	4.90689	5.45943
DNPEP	0	6.39232	3.45943	5.32193	6.76818	5.67243	6.45943	5.32193	5.35755	4.70044	6.12928	2.32193	4.08746	0	0	1.58496	1.58496	0	3.32193	3.45943	3.16993	0	3.45943	0	5.35755	4.90689
DNPH1	1	4.39232	2.80735	4.64386	3.16993	5.9542	3.58496	5.24793	3.16993	4.32193	5.61471	4.90689	4.52356	0	2.58496	1.58496	3.32193	1.58496	0	1	1.58496	3.32193	0	0	5.39232	3
DNTTIP2	0	0	0	0	5.83289	0	5.52356	5	0	4.52356	5.32193	3.80735	3.16993	0	0	0	0	0	0	0	0	1.58496	0	0	2.32193	4.70044
DOCK11	0	6.50779	0	0	4.52356	0	3.80735	0	0	0	0	0	0	0	0	0	0	1	0	0	0	0	0	0	0	0
DOCK4	0	5.75489	0	0	2	0	0	0	0	0	0	0	0	0	0	3.90689	0	0	4.16993	0	0	0	0	0	0	0
DOCK6	0	0	0	3.90689	6.52356	6.26679	7.74147	0	4.08746	0	6.98868	5.78136	0	0	0	0	0	0	2.58496	0	0	0	0	0	0	6.30378
DOCK7	1	5.9542	0	4.58496	7.22882	6.64386	6.18982	5.42626	3.16993	0	3.32193	2	2.58496	0	0	0	0	0	1	5.12928	0	4.9542	0	6.30378	3.90689	4.16993
DOCK9	0	0	0	0	5.83289	0	0	0	0	0	0	0	0	0	0	0	0	0	4.08746	0	0	6.10852	3.90689	0	0	5.12928
DOK3	1.58496	6.10852	5.04439	0	2.32193	2.32193	1	4.24793	0	0	1.58496	0	2.32193	0	1	4.64386	3.90689	0	0	0	0	2.80735	0	0	4.58496	2.32193
DOLPP1	1	0	1.58496	3	1	3.45943	0	2.80735	1.58496	0	0	1	1	0	0	0	2	0	0	0	1.58496	0	0	0	3	2.80735
DONSON	0	0	0	0	0	0	3	0	0	0	0	0	0	0	0	0	0	0	0	0	0	0	0	0	0	0
DPF1	3.90689	0	0	0	1.58496	0	0	0	0	0	2.32193	0	0	0	0	0	0	0	0	0	0	0	0	4.16993	0	1.58496
DPF2	0	5.67243	2.80735	0	3.16993	0	4.39232	4.75489	0	5.35755	4.32193	0	1.58496	0	0	2.58496	0	0	0	0	0	4.64386	0	0	1	0
DPH1	0	1.58496	0	0	3.16993	4.32193	4.16993	3.58496	0	3.90689	2.58496	3	0	0	0	0	0	0	0	0	3.45943	0	0	0	4.39232	4.08746
DPH2	0	0	0	0	2.32193	3.58496	3.45943	3.45943	0	3.90689	2.32193	4.24793	0	0	0	0	0	2	0	1	0	0	0	0	2	0
DPM1	5.72792	6.90689	4.70044	6.64386	6.72792	6.85798	5.49185	6.20945	5.61471	5.35755	5.78136	6.83289	5	0	0	3.80735	4.32193	4.70044	6.26679	5.52356	3.80735	1.58496	4.52356	4.08746	5.61471	5.35755
DPM3	0	4.39232	3	3.80735	4.70044	5.39232	3.90689	4.45943	2.80735	3.32193	3.32193	3.45943	1.58496	0	0	3	0	1.58496	3.16993	0	1	1.58496	2.80735	2.32193	1.58496	0
DPP3	7.3837	8.17991	6.74147	7.5157	5.9542	8.97154	7.05528	8.3837	7.92481	7.35755	7.46761	6.83289	7.77479	0	4.85798	5.55459	6.10852	5.97728	5.72792	6.06609	5.9542	6.12928	2.80735	5.67243	8.47168	7.49185
DPP4	3	4.58496	0	0	1.58496	0	6.87036	6.30378	4.80735	3	7.57743	0	0	0	0	0	0	0	3.45943	0	0	3.90689	4.45943	0	0	0
DPP6	0	0	0	0	2.32193	0	0	0	0	0	0	0	0	0	0	0	0	0	0	0	0	0	0	0	0	0
DPP7	3.80735	7.59991	5.32193	5.93074	3	7.31288	6.37504	6.50779	5.90689	5.67243	6.91886	5.93074	5.49185	0	3.45943	6.16993	5.80735	4.85798	3.90689	0	0	2.80735	4.39232	0	3.90689	5.49185
DPY19L1	4.32193	5.2854	4.16993	1.58496	2.32193	4.80735	4.90689	3.80735	4.70044	4.39232	3.58496	2.32193	3	0	0	0	0	3	4.64386	5.20945	0	5.42626	4	3.80735	3.80735	2.32193
DPY19L2	2.32193	0	0	0	0	0	0	1.58496	1	0	0	0	0	0	0	0	1	0	0	0	0	2.80735	0	1	1	0
DPY30	3.70044	4.90689	1	3.45943	4.75489	3.90689	4.75489	3.90689	1	4	3.16993	2.80735	3.16993	0	2.32193	3.45943	1	1.58496	2.80735	0	2.80735	4.08746	3.58496	4.39232	2.58496	3
DPYSL2	7.70044	10.2621	7.98868	4.39232	6.10852	7.89482	8.64746	8.02237	6.89482	6.32193	8.67596	5.45943	7.21917	5.20945	7.56224	8.04439	6.96578	7.87652	4.75489	5.80735	4.39232	6.79442	5.85798	7.21917	7.76818	5.55459
DR1	3.32193	4.45943	2.58496	3	2.58496	2	3.70044	2.32193	1	1	2	2	2.32193	0	3.16993	3.16993	0	3.58496	1.58496	0	2.32193	2.32193	3.32193	1.58496	1.58496	1
DRAM1	0	0	0	0	1.58496	0	0	0	0	0	0	0	0	0	0	0	0	0	0	0	0	0	0	0	0	0
DRAP1	0	3.16993	0	2.32193	2	2.80735	4.24793	4	0	0	3.32193	1	1.58496	0	0	0	0	0	0	0	0	0	1	0	2.58496	2.32193
DRC1	0	0	0	0	2.80735	0	0	0	0	0	0	0	0	0	0	0	0	0	0	0	0	0	0	0	1	0
DRC7	0	0	0	0	0	0	0	0	0	0	0	0	0	0	0	0	0	0	0	0	0	0	0	0	0	0
DRG1	2.32193	4.70044	0	4.9542	5.2854	4.58496	6.18982	4.90689	4.64386	4.32193	3.16993	4.32193	4.08746	0	2.32193	1	1	0	3.32193	0	2.32193	0	3.70044	2	3.70044	4.64386
DSG2	5.85798	0	2.58496	6.35755	7.99435	7.37504	8.16993	7.26679	5.32193	6.90689	7.76155	7.62936	7.41785	0	0	0	0	0	6.64386	6.2854	0	5.04439	5.16993	4.75489	4.90689	7.94837
DSP	7.7211	0	0	6.59991	11.0307	8.23362	10.568	10.9241	7.76155	9.33762	9.76653	10.4336	8.66888	0	2.58496	0	5.39232	0	9.68825	6.90689	5.61471	8.66534	8.92481	8.6865	0	9.61839
DST	7.87652	9.97011	0	1.58496	3.32193	9.2503	9.46964	8.60733	6.32193	8.41363	8.16993	0	0	0	0	6.47573	4.39232	0	7.58496	0	0	6.82018	0	1	2.32193	7.10852
DSTN	6.35755	5.04439	5.32193	8.05528	5.93074	7.07682	7.97154	7.08746	6.04439	6.22882	6.75489	6.56986	6.58496	0	3.80735	4	3	3.70044	5.52356	5.67243	5.52356	4.90689	3.32193	4.85798	6.59991	6.10852
DTD1	4.16993	3.80735	1	2.32193	3	3.70044	4	2	4.58496	2.58496	2.58496	2.80735	3.45943	0	0	2.32193	1.58496	1	1.58496	0	0	0	0	0	0	2.80735
DTNA	0	0	0	0	1	2	2.32193	2	0	2.80735	0	0	0	0	0	0	0	0	0	0	0	0	2.32193	0	0	2.32193
DTNBP1	0	0	0	3.58496	0	0	2.32193	0	0	0	2.32193	0	0	0	0	0	0	0	0	0	0	0	0	0	0	0
DTYMK	0	1.58496	0	5.12928	5.42626	4.80735	6.62936	5.93074	3.45943	0	5.70044	5.04439	4.58496	0	3	0	3	2.80735	0	0	4.24793	1.58496	0	0	6.35755	4.80735
DUOX2	0	0	0	0	4.70044	0	0	0	3.58496	0	3.58496	0	0	0	0	0	0	0	0	6.53916	0	0	0	0	0	4.24793
DUS2	3.32193	0	0	0	1.58496	0	4.08746	2	0	0	0	0	0	0	0	0	0	0	0	0	0	0	0	0	0	0
DUSP16	0	1	0	0	1.58496	0	0	0	0	0	0	0	0	0	0	0	0	0	0	0	0	0	0	0	0	0
DUSP18	2	0	0	0	1	0	2	0	0	0	0	0	0	0	0	0	0	0	0	0	0	0	0	0	0	0
DUSP22	0	0	1.58496	1	2	0	0	0	0	0	0	0	0	0	0	0	0	0	0	0	0	0	0	0	0	0
DUSP3	3.80735	6.20945	3.16993	3.45943	4.08746	5.24793	5.35755	4.90689	4.45943	3.70044	3.45943	2.58496	3.16993	0	1.58496	3.58496	4.39232	3.80735	0	0	3	3.32193	1.58496	3.45943	4.16993	1
DUT	0	5.42626	5.55459	6.39232	4.85798	5.64386	5.85798	7.65821	4.39232	6.85798	5.80735	4.90689	5	0	0	5.04439	0	3.45943	4.70044	3.90689	0	6.06609	0	0	5.88264	5.75489
DYNC1H1	9.0954	10.5821	9.23362	8.99435	9.78136	10.0098	9.88417	8.71768	9.17991	8.08746	8.62205	8.74147	8.87652	5.39232	7.59246	7.84549	8.29921	8.5157	8.46352	7.07682	9.01123	7.76155	7.96578	8.75154	9.43879	8.37504
DYNC1I2	4.45943	8.87958	4.45943	6.44294	7.74147	7.09803	7.47573	6.56986	6.12928	4.32193	7.45943	6.06609	5.9542	0	5.2854	7.14975	4.16993	5.39232	6.61471	4.90689	6.56986	5.78136	5.83289	5.64386	5.97728	5.42626
DYNC1LI1	3.16993	7.19967	4.58496	7.16993	5.64386	5.97728	6	5.52356	6.16993	4.16993	4.32193	4.9542	5.35755	4.08746	3.58496	5.42626	3.58496	3.90689	4.64386	0	4.39232	3.70044	2.32193	0	5.61471	4.75489
DYNC1LI2	5.04439	6.97728	5.39232	4.9542	6.61471	6.64386	7.75489	6.32193	5.67243	0	6.37504	6.55459	6.10852	1	2.32193	4.39232	2	4.75489	5.58496	4.64386	2.58496	4.24793	3.45943	2.80735	5.67243	5.16993
DYNLL1	5.78136	6.10852	3.90689	5.04439	3.90689	5.20945	6.26679	5.85798	4.80735	5.55459	5.83289	5.61471	5	0	4.80735	2.58496	3.90689	2.80735	4.9542	0	3.58496	4.80735	3	4.45943	4.75489	4.58496
DYNLL2	2.58496	3.58496	1.58496	2.32193	0	3.70044	3.90689	3.80735	4.24793	3.58496	2.58496	2.80735	1.58496	1	2.32193	0	0	0	0	0	2.32193	0	2.58496	1.58496	2.80735	3.32193
DYNLRB1	2.80735	3.90689	3.58496	3.70044	4.64386	1.58496	4.58496	3.16993	0	4.24793	4.08746	3.80735	4.08746	0	2.32193	2.80735	1	3.32193	4.16993	3	0	2.58496	0	0	4.32193	3.90689
DYNLT1	0	3.58496	3.90689	2.80735	3	2.80735	1	2.80735	2	1.58496	0	2.58496	2	0	0	1	0	1.58496	1.58496	2.32193	1.58496	1	2.32193	0	2	1
DYNLT3	0	0	0	0	1.58496	1	2.80735	0	0	0	0	0	0	0	0	0	0	0	0	0	0	0	0	0	0	0
DYX1C1	0	1	0	0	3.80735	0	3.16993	0	0	2.32193	0	0	0	0	0	2.80735	0	0	0	0	0	0	0	0	0	0
E2F5	0	0	0	0	0	0	0	0	0	0	0	0	0	0	0	0	0	0	0	0	0	0	0	0	0	0
EBLN2	0	0	0	0	2.32193	0	0	0	0	0	0	0	0	0	0	0	0	0	0	0	0	0	0	0	0	0
EBNA1BP2	0	0	0	0	3.45943	0	4.64386	0	0	4.39232	0	0	4.24793	0	0	0	0	0	0	0	0	0	0	3.90689	0	2.58496
ECE1	0	0	0	0	4.70044	2.32193	4.70044	0	0	0	2.80735	0	0	0	0	0	2.80735	0	0	0	0	0	0	0	1	0
ECH1	8.27146	8.3966	7.93074	7.88264	8.56224	8.69697	9.13443	8.75154	8.86728	7.16993	8.00562	8.79116	7.7879	4.75489	6.84549	6.84549	7.12928	7.53916	7.91289	6.49185	8.27146	8.16491	7.35755	3.80735	8.2854	8.28077
ECHDC1	5.20945	6.76818	5.70044	0	3.16993	5.2854	5.20945	5.12928	6.58496	5.83289	5.08746	1.58496	4.75489	0	4.70044	3.90689	6.12928	5.32193	3.45943	4.58496	1.58496	2	2.58496	0	4.39232	4.58496
ECHDC2	0	0	0	0	4.45943	3.58496	0	2.80735	1	0	0	0	0	0	0	0	0	0	3.90689	2.80735	0	0	0	0	0	0
ECHDC3	0	0	0	0	3.58496	3.32193	0	1.58496	0	0	3	3	0	0	0	0	0	0	0	0	0	0	0	0	0	0
ECHS1	7.2854	7.6865	6.67243	6.6865	8.07146	7.50779	7.40939	7.22882	7.39232	8.32193	7.33985	6.06609	6.98868	3.45943	6.42626	5.85798	6.42626	6.37504	7.08746	6.88264	7.91886	6.14975	7.10852	7.27612	6.75489	7.5157
ECI1	3.32193	5.2854	4.16993	5.16993	6.62936	7.2854	6.96578	7.45943	6.6865	7.18982	6.67243	5.2854	6.20945	0	3.32193	1.58496	3.45943	0	5.75489	6.20945	5.67243	3.90689	1	0	6.14975	6.14975
ECI2	0	4	2.32193	0	7.74147	5.12928	5.97728	5.55459	5.42626	3	4.32193	4.16993	0	0	0	0	2	0	0	0	1.58496	1.58496	0	0	3.90689	0
ECM1	0	0	0	4.80735	6.08746	0	0	2.32193	0	6.62936	3.45943	0	0	0	0	0	0	0	0	4.52356	0	0	0	0	0	0
ECM29	5.2854	7.44294	5.80735	6.71425	7.04439	7.88264	8.50383	6.42626	5.32193	3.80735	3.45943	5.75489	4.45943	0	0	4	4.80735	4.16993	5	4.24793	5.32193	0	0	5.49185	6.06609	6.10852
ECT2	4.52356	0	0	0	2.58496	0	0	4.85798	1	0	0	4.39232	0	0	0	1	1	0	0	0	0	3.70044	3.16993	4.85798	0	0
EDC3	2.32193	5.67243	3.58496	4.16993	2.58496	5.16993	5.12928	4.80735	3.32193	2.58496	4	5	2.32193	0	0	1	0	0	0	0	0	2.58496	0	0	2.32193	0
EDC4	5.97728	7.32193	5.80735	7.36632	5.52356	6.76818	7.35755	7.15987	6.56986	6.04439	5.42626	6.26679	5.78136	0	2	0	4.58496	4.75489	5.16993	4.16993	0	4.45943	0	5.35755	7.03342	5.78136
EEF1A1	11.0607	11.2143	10.8918	11.2697	11.1731	10.9016	11.7624	10.9099	10.6733	10.988	10.6064	11.4231	10.9076	5.45943	9.85953	9.67948	9.41996	9.86728	10.2831	9.19722	10.0112	9.8009	9.31967	9.28309	10.8757	10.5236
EEF1A1P5	7.49185	8.27146	7.92481	9.24555	9.41785	7.60733	9.85643	8.96	6.06609	8.17991	8.2384	9.13443	6.90689	3.32193	4.64386	6.52356	4.08746	6.72792	7.56986	6.78136	0	6.61471	5.75489	6.53916	8.69349	8.30378
EEF1A2	8.04439	8.10329	7.87652	8.81057	8.94251	7.97154	8.56986	7.9542	8.01123	7.9542	7.85798	8.61471	7.97728	0	7.05528	6.64386	6.79442	7.22882	6.9542	6	7.37504	6.74147	7.29462	6.47573	8.01123	7.52356
EEF1B2	3.16993	6.02237	5.12928	5.80735	5.55459	5.67243	6.10852	5.90689	4.08746	5.16993	5.58496	6.85798	6.40939	1	3.58496	5.80735	3.45943	4.45943	5.16993	2	4.58496	5.97728	2.32193	1.58496	5.93074	6.22882
EEF1D	8.48382	9.01681	7.29462	8.43879	8.2854	8.72451	8.76487	8.39232	5.49185	8.92184	7.65821	9.43254	9.18239	3.80735	7.59991	7.97154	6.90689	6.9542	7.46761	2.80735	5.78136	6.88264	8.40514	6.94251	8.09276	7.53916
EEF1E1	0	3.80735	0	1	5.93074	3.45943	3.16993	3.90689	5.39232	3.58496	0	4.08746	1	0	2	0	3.16993	0	2.80735	0	0	0	0	3.80735	3.80735	3.70044
EEF1E1-BLOC1S5	0	0	0	0	3.90689	0	0	0	0	0	0	0	0	0	0	0	0	0	0	0	0	0	0	0	0	0
EEF1G	8.30378	8.48382	7.53138	8.10852	7.98299	8.81698	8.22882	8.10852	7.78136	7.40939	8.02791	8.44294	7.60733	5.12928	6.98868	6.87036	7.04439	6.6865	7.27612	7.6865	7.50779	6.90689	7.3837	8.22882	8.37938	8.2854
EEF2	9.78136	10.1241	9.57932	9.90388	10.1331	9.90238	10.3174	9.34651	9.0634	9.63844	9.16491	10.0674	9.62388	4.58496	8.21917	8.36632	8.16993	8.0607	8.40514	8.29002	7.8392	7.64386	7.85175	8.21917	9.89633	9.01959
EFCAB11	0	0	0	0	2.32193	0	0	0	0	0	0	0	0	0	0	0	0	0	1	0	0	0	0	0	2.32193	0
EFCAB13	0	0	0	0	3.58496	0	0	0	0	2.80735	0	2	2.80735	1.58496	0	0	0	0	0	0	0	0	0	0	0	0
EFHC1	2.80735	0	2.80735	3.80735	0	0	0	0	2	0	2.58496	0	0	0	0	2.58496	0	3	0	0	3.58496	0	5.08746	0	0	0
EFHD1	6.44294	6.2854	1	5.2854	4.52356	5.90689	4.80735	4.32193	3.70044	3.58496	4.16993	2.32193	2	3.58496	5.35755	2.80735	3.90689	3.90689	2.32193	0	4	3	4.45943	5.16993	4.85798	1
EFHD2	7.26679	7.74147	5.45943	4.64386	4.24793	7.41785	6.55459	5.93074	6.79442	6.26679	6.56986	5.58496	5.16993	4.64386	7.19967	5.88264	5.70044	6.24793	2	0	5.58496	5.49185	5.61471	5.49185	6.06609	5.08746
EFNA1	0	0	0	0	1.58496	0	0	0	0	0	0	0	0	0	0	0	0	0	0	0	0	3.70044	0	0	0	0
EFNA3	0	0	0	0	0	0	0	0	0	0	0	0	0	0	0	0	0	0	0	0	0	0	0	0	0	0
EFR3A	0	6.55459	4.32193	0	5.42626	4	5.16993	4.70044	0	4.80735	2.32193	0	0	0	0	0	0	1.58496	5.20945	5.72792	0	0	0	0	3.70044	2.80735
EFR3B	0	0	0	0	1.58496	0	0	0	0	0	0	0	0	0	0	0	0	0	0	0	0	0	0	0	0	0
EFTUD2	7.92481	9.76321	8.86419	9.43671	10.1357	9.81858	10.0334	9.85019	8.48784	9.4818	9.38154	9.74483	8.97441	4.90689	5.90689	8.12412	7.61471	7.94837	8.81057	7.32193	6.65821	8.16993	7.82018	7.82018	8.93369	8.96867
EGFR	4.70044	0	0	6.62936	4	7.27612	8.01681	4.45943	5.24793	5.85798	6.87036	10.1687	5.72792	0	0	0	0	0	6.42626	6	0	0	0	0	5.78136	8.91886
EGLN2	0	0	0	0	1.58496	0	0	0	0	0	1.58496	0	0	0	0	0	1.58496	0	0	0	0	0	0	3.45943	0	0
EGLN3	0	1.58496	0	1	0	0	3.80735	0	0	0	3.32193	0	1	0	0	0	0	0	0	0	0	0	0	0	0	0
EHBP1	0	0	0	0	4.75489	0	4.58496	0	2.58496	4.52356	0	0	2	0	0	0	0	0	0	0	1	0	2.58496	0	2.80735	0
EHD1	7.88264	9.41996	7.56224	7.66534	6.90689	7.43463	7.53916	7.76155	7.63662	6.58496	6.75489	7.29462	6.47573	7.93664	7.63662	6.14975	7.44294	7.98299	7.7211	7.04439	6.56986	3.80735	5.49185	6.89482	8.04985	7.74819
EHD3	4.75489	6.94251	5.32193	4.45943	3.90689	4.80735	5.24793	5.39232	4.85798	2	4.52356	4.39232	0	5.49185	3.70044	4.24793	4.80735	4.85798	4.08746	4.45943	3.16993	0	4	3.90689	5.32193	5.12928
EHD4	6.2854	7.67243	5.83289	5.90689	3	6.37504	6.91886	7	5.93074	4.90689	5.78136	5.24793	5.2854	0	5.04439	5.52356	6.18982	5.52356	4.32193	4.85798	4.24793	0	3.70044	0	5.97728	5.52356
EHHADH	0	0	0	0	3.32193	7.45121	5.88264	7.07682	6.04439	0	0	0	0	0	0	0	0	0	0	0	0	0	0	0	0	4.64386
EI24	0	0	2.32193	4.16993	2.32193	5.20945	4.52356	6.02237	4.39232	3	1	5.08746	3.90689	0	0	0	0	0	4.24793	2.32193	0	1	0	0	5.32193	0
EIF1	2.80735	5.39232	3	3.80735	5.78136	3	6.10852	5.04439	2	4.85798	4.24793	4	4.58496	0	1	3.16993	0	2.80735	2.80735	4.16993	2	3.45943	4.16993	3.80735	3.45943	3.80735
EIF1AX	0	2.32193	3.16993	5.24793	4.52356	4.08746	5.88264	6.06609	0	5.67243	5.24793	4.58496	3.70044	0	0	0	0	0	0	2.58496	0	0	0	0	3.80735	4.75489
EIF1AY	0	1.58496	3.58496	4.24793	3.45943	3	5.64386	5.45943	0	5.04439	4.58496	3.90689	4.08746	0	0	0	0	0	0	1.58496	0	0	0	0	3.16993	4.16993
EIF1B	0	3.58496	0	3.45943	4.90689	2.32193	5.45943	3.80735	0	4	3.80735	3.45943	3.45943	0	0	1	0	0	0	3.70044	0	1	0	0	1	3.32193
EIF2A	0	5.78136	3.45943	5.75489	2.80735	5.67243	5.45943	6.12928	0	6.04439	4.52356	6.62936	5.16993	0	0	4.16993	2.32193	4.32193	3.90689	0	3.58496	3.32193	4.85798	3.70044	5.52356	3.16993
EIF2AK2	3.90689	5.80735	4.16993	7.27612	2.58496	5.85798	5.70044	6.08746	5.04439	0	4.08746	6.08746	5.39232	0	3.90689	3.58496	3.45943	3.32193	2	4.85798	0	1	0	0	3.45943	5.39232
EIF2B1	5.58496	6.10852	5.52356	4.45943	4.70044	5.2854	5.93074	4.80735	3	3	6.08746	2.58496	2	0	0	3.16993	3.16993	0	2.58496	2.32193	0	0	0	1.58496	6.30378	4.32193
EIF2B2	5.12928	5.16993	3.70044	4.75489	6.18982	4.16993	5.80735	4.32193	0	3.45943	4.64386	5	4.90689	0	0	1.58496	2.80735	3.45943	1	2.58496	3.45943	0	3	3.16993	4.75489	3.58496
EIF2B4	0	0	2.32193	5.12928	4.32193	4.24793	4.58496	2.58496	2	0	5.61471	5.2854	3.70044	0	0	4.58496	0	0	1.58496	0	0	0	0	0	5.67243	4.70044
EIF2B5	0	3.32193	3.70044	3.80735	5.04439	4.16993	5.75489	3.70044	0	0	2.32193	4.08746	0	0	0	0	2	0	2.80735	2.80735	2	2.58496	0	3.90689	4.52356	3.16993
EIF2D	3.58496	3.16993	0	2.32193	2	4.45943	0	1.58496	0	0	0	6.2854	0	0	0	0	0	0	1.58496	0	0	1	0	0	0	2.32193
EIF2S1	5.52356	7	5.93074	6.49185	6.42626	6.32193	7.29462	6.50779	4.64386	6.16993	6.12928	7.59246	6.75489	0	5.97728	5.52356	5.04439	5.12928	5.2854	0	5.45943	5.58496	5.2854	4.85798	6.39232	6.78136
EIF2S2	4.52356	5.75489	4.39232	4.45943	5.24793	5.75489	6.58496	4.85798	2.32193	3	5.20945	4.70044	3.90689	0	4.90689	5.39232	3.45943	4.45943	4.24793	2.58496	4.45943	4.58496	4.32193	0	5.49185	5.35755
EIF2S3	4.9542	6.59991	5.45943	6.84549	5.90689	7.34873	7.32193	6.84549	6.47573	5.72792	6.65821	7.05528	5.9542	0	2.58496	5.45943	4.52356	5.04439	5.52356	3	4.45943	5.35755	5.32193	5.16993	6.94251	6.91886
EIF2S3L	4	6.37504	5.32193	6.64386	6.26679	7.33985	7.39232	6.9542	6.52356	5.78136	6.72792	7.06609	6.04439	0	2.32193	4	4.16993	4.90689	5.32193	2.80735	2	4.32193	4.16993	4.45943	6.96578	7.03342
EIF3A	7.42626	8.62205	6.85798	8.20945	6.78136	7.8009	8.30834	7.27612	7.40939	7.18982	7.82655	7.74147	7.15987	0	5.12928	6.2854	7.10852	5.90689	5.20945	4.24793	6.10852	6.33985	6	6.49185	8.11894	7.40088
EIF3B	2.32193	7.42626	5.35755	7.87652	6.80735	7.46761	8.62205	7.48382	6.39232	5.64386	7.30378	8.33539	6.84549	0	3.58496	5.67243	5.2854	3.90689	4.45943	0	2.32193	5.55459	5.75489	4.39232	7.82018	6.12928
EIF3C	7.01123	7.12928	5.12928	7.71425	4.45943	7.49985	7.92481	7.2384	7.14975	7.17991	6.78136	7.67948	6.6865	3	3.58496	4.75489	4.52356	4.80735	3.90689	0	5	5.75489	6.44294	4.90689	6.79442	6.88264
EIF3D	3.70044	7.32193	4.16993	5.97728	5.90689	4.64386	6.39232	6.08746	4.24793	5.12928	5	5.12928	5.32193	0	4.58496	4.39232	5.2854	3	3.80735	1.58496	2	5.75489	3.16993	2	5.67243	5.2854
EIF3E	7.94251	8.85175	7.94837	8.07146	8.97441	8.12412	9.28309	8.2854	7.17991	8.11374	7.62205	8.05528	7.5157	0	5.39232	6.72792	7.01123	7.16993	6.78136	6.33985	6.67243	7.2854	7.48382	7.49985	8.11894	7.6865
EIF3F	5.78136	6.24793	6.26679	6.10852	5.9542	6	6.59991	5.72792	4.75489	6.65821	6.02237	6.22882	5.80735	0	2.32193	4.75489	5.04439	4.9542	5.04439	5.12928	3.90689	4.39232	4.16993	5.04439	6.10852	6.08746
EIF3G	4.24793	6.94251	3.45943	6.2854	4	6.61471	7.62205	6.55459	4.75489	7.05528	6.56986	6.89482	5.90689	0	4.52356	3.58496	3.70044	0	4.32193	4.80735	0	5.2854	2.32193	0	6.10852	5.61471
EIF3H	5.55459	6.08746	5.70044	5.93074	4.90689	6.42626	6.08746	6.20945	5.67243	5.72792	6.24793	5.08746	5.55459	0	4.24793	3.32193	5.12928	3.90689	4.24793	0	5.04439	5.12928	5.72792	4.08746	6.33985	6.20945
EIF3I	3	5.78136	4	5.67243	5.32193	6	6.53916	6.02237	4.70044	5.2854	4.52356	6.42626	4.58496	0	4.80735	2.32193	3.45943	4.24793	4.85798	2.58496	4.16993	4.16993	4.39232	3	5.24793	4.24793
EIF3J	0	1.58496	3.70044	3.90689	2.58496	2.80735	5.35755	1.58496	3.45943	3.90689	5.85798	4.70044	3.58496	0	0	2	1	1.58496	1	0	2.80735	0	0	1	4	4.9542
EIF3K	5.45943	6.71425	4.45943	4.70044	6.20945	6.56986	7.81378	5.08746	3.90689	6.78136	5.70044	5.35755	3.90689	0	0	3.32193	4.9542	2.58496	4.9542	0	4	4.24793	4.9542	4.24793	6.30378	5
EIF3L	8.41363	8.33092	7.27612	8.18982	7.54689	8.3837	8.90989	8.43045	7.5157	7.46761	7.62205	7.16993	7.22882	2.80735	3.90689	6.88264	6.80735	6.53916	5.64386	5.49185	6.84549	6.61471	7.14975	7.45121	7.97154	6.9542
EIF3M	6.58496	7.45943	5.58496	5.75489	8.01123	7.2854	7.6865	5.12928	6.26679	6.02237	5	4.24793	4.08746	0	2	5.58496	6	5.75489	5.70044	1.58496	6.33985	5.80735	5.78136	6.6865	7.02237	6.56986
EIF4A1	10.6909	10.9665	10.6952	10.3443	10.9622	10.813	11.2282	9.8933	10.1137	10.6978	10.2761	10.4707	10.3685	6.85798	9.09276	9.28771	9.77479	9.62205	10.2384	9.5411	9.46352	8.62936	9.86882	9.91289	11.0788	10.1774
EIF4A2	8.9542	8.89785	8.62571	8.83605	8.93958	9.06609	9.77808	8.64386	8	8.85175	8.35755	8.85487	8.85487	5.61471	7.39232	7.13955	7.04439	7.46761	7.9542	8.32193	8.13955	7.45121	7.85175	7.61471	9.03617	8.76818
EIF4A3	7.08746	7.12928	6.18982	7.35755	7.75489	7.61471	7.8009	7.71425	6.89482	6.72792	7.41785	7.52356	7.19967	3.90689	6.64386	6.04439	5.12928	6.08746	7.02237	4.9542	6.33985	6.26679	6.24793	5.78136	6.56986	6.65821
EIF4B	4.64386	3.58496	4.39232	7.34873	7.15987	6.26679	6.98868	7.31288	1.58496	7.61471	7.05528	7.59246	6.39232	0	0	4.08746	0	0	5.58496	0	2.58496	6.33985	4.85798	4.9542	6.18982	5.88264
EIF4E	3.45943	5.49185	2.32193	4.64386	3.80735	5.35755	4.9542	4.32193	1	2.58496	4.16993	2	3.80735	0	0	0	0	2.32193	1.58496	0	3.90689	3.70044	0	3.80735	3.70044	4.32193
EIF4E1B	2	2.58496	2	2	3.16993	2.80735	1.58496	2	0	1.58496	2.32193	0	0	0	0	0	0	0	0	0	2	3.16993	0	0	0	1.58496
EIF4E3	0	1.58496	1	0	2	0	0	0	1.58496	0	0	0	0	0	0	0	0	0	0	0	1	0	0	0	0	1
EIF4EBP1	0	1.58496	0	0	3.58496	0	4.32193	0	0	2.32193	1	0	2.32193	0	0	0	0	1.58496	0	0	0	0	0	0	0	1
EIF4EBP2	0	3.16993	1	1	1	0	3.16993	1.58496	0	1.58496	1	1	0	0	1	0	0	0	0	0	0	0	0	0	0	1
EIF4G1	8.57743	9.34873	8.99718	10.0634	9.72281	10.1662	10.6996	9.59432	7.41785	9.23122	8.94837	10.2808	8.12928	3.16993	5.20945	6.72792	4.58496	6.71425	8.08746	8.3837	7.80735	7.50779	7.10852	8.09803	8.93664	8.3443
EIF4G2	7.70736	7.41785	7.11894	7.22882	7.67948	7.94251	8.71425	7.06609	6.80735	6.74147	7.35755	7.24793	7.56224	0	5.16993	4.32193	5.12928	6.56986	6.06609	6.84549	6.12928	5.9542	6.56986	7.88874	8.2384	7.25739
EIF4G3	0	7.27612	5.45943	6.61471	7.70044	6.52356	7.7879	5.12928	0	5.80735	6.06609	5.93074	5.72792	0	0	0	0	0	4.08746	4.32193	5.20945	0	0	4.9542	6.89482	4.58496
EIF4H	4.24793	6.30378	5.45943	5.49185	5.24793	6.40939	5.32193	5.64386	3.45943	6.55459	6.08746	6.2854	5.52356	0	4.64386	5.70044	4.16993	3	4.75489	4.32193	1.58496	3.32193	2.58496	3	6.56986	5.24793
EIF5	3.45943	4.24793	2	4.80735	2.80735	5.42626	6.56986	5.67243	4.32193	0	3.90689	5.80735	4.80735	0	4	2.32193	2.32193	3	4.24793	0	5	3.32193	5	3.45943	4.52356	4.45943
EIF5A	6.2854	8.57365	6.06609	7.15987	7.46761	8.77808	8.14466	7.30378	7.24793	7.20945	7.11894	8.04439	7.77479	0	7.13955	6.08746	5.20945	6.64386	6.2854	5.61471	4.64386	5.75489	6.72792	6.35755	8.45943	6.96578
EIF5A2	4.75489	7.10852	5.52356	6.45943	6.96578	6.82018	7.50779	6.33985	5.67243	6.18982	5.58496	6.9542	6.58496	0	4.70044	3.58496	3.32193	4.32193	4.85798	4.16993	1	4.52356	2.58496	4.08746	5.97728	5.24793
EIF5AL1	3.16993	6.67243	5.45943	5.75489	6.04439	6.32193	6.55459	5.32193	5.75489	4.52356	5.2854	6.20945	5.97728	0	5.04439	4.24793	2.58496	3.58496	5.08746	4	1	3.80735	3.45943	4	6	5
EIF5B	0	6.39232	4.75489	6.24793	5.39232	5.80735	8.27146	5.49185	5.42626	4.90689	5.24793	6.79442	5.16993	0	0	0	3	0	6.20945	5.16993	0	0	0	5.04439	5.80735	6.37504
EIF6	7.16993	7.04439	5.12928	6.52356	7.8009	7.36632	7.78136	6.35755	6.33985	7.14975	6.80735	6.62936	6	2.32193	5.67243	4.52356	5.12928	4.58496	5.9542	4.9542	5.64386	5	5.16993	5.32193	7.05528	6.16993
EIPR1	0	0	0	0	0	0	2.32193	1	0	2	2.32193	0	0	0	0	0	0	0	0	0	0	0	0	0	2.32193	0
ELAC2	0	0	0	0	1.58496	4.85798	5.42626	3.16993	0	2.32193	4.64386	5.97728	2.32193	3.16993	0	0	0	0	0	1	0	0	4.39232	0	0	0
ELANE	7.31288	6.08746	2.58496	3	4.39232	6	4.45943	3.16993	6.67243	0	0	2.80735	4	5.42626	6.2854	2.32193	5.35755	4.80735	4.85798	0	5.85798	4	4.75489	4.24793	4.39232	2.32193
ELAVL1	4.64386	7.26679	5.83289	7.08746	7	6.10852	7.52356	6.74147	6.08746	5.20945	5.49185	6.6865	6.49185	0	4.90689	4.08746	5.58496	3.70044	6.14975	0	4.32193	6.06609	5.16993	1.58496	6.12928	5.70044
ELAVL3	0	0	0	0	2.80735	0	0	0	0	0	0	0	0	0	0	0	0	1	0	0	0	0	0	0	0	0
ELF1	0	5.04439	0	3	4.08746	0	2.58496	3.70044	0	3	2.80735	3.16993	0	0	2.80735	2.80735	2.32193	0	2	2.58496	0	4	0	0	0	3.90689
ELF2	0	0	1.58496	2.32193	0	0	1.58496	0	0	0	0	0	0	0	0	0	0	0	0	0	0	0	0	0	1	0
ELF3	1	0	0	0	2	2.80735	0	3.80735	1	0	0	1.58496	2	0	0	0	0	0	0	0	0	0	0	0	0	3.45943
ELL2	0	2.32193	0	2.80735	1.58496	0	0	1.58496	0	0	0	0	0	0	0	0	0	0	0	0	0	0	0	0	0	0
ELMO1	2.32193	8.57743	8.12412	0	2.80735	4.90689	4.39232	5.2854	4.16993	5.16993	2	0	0	4.85798	4.24793	5.78136	5.49185	5.55459	0	0	0	0	3.70044	0	6.47573	4.75489
ELMO2	3.58496	7.97154	7.72792	4.75489	3.16993	5.90689	5.70044	7.19967	3.90689	5.52356	4.24793	5.78136	6.52356	5	0	4.24793	7.19967	5.72792	0	3.45943	0	0	0	2.32193	7.30378	6.53916
ELMO3	0	0	0	0	5.04439	6.72792	7.54689	5.9542	2.58496	5.70044	5.67243	5.52356	0	0	0	0	0	0	0	4.08746	0	0	0	0	5.12928	4.08746
ELMOD2	5.39232	5.67243	2.32193	4.45943	4.45943	5.04439	6	5.45943	5.04439	3	5.78136	0	4.32193	0	0	2.58496	3.32193	4.32193	2.80735	4.24793	4.24793	4.08746	3	2	4.75489	4.08746
ELMSAN1	0	0	0	4.9542	3.32193	0	0	0	0	0	6.33985	2.58496	0	0	0	0	0	0	0	0	0	0	0	0	0	0
ELOF1	0	0	2.32193	0	2.32193	0	1	2	0	2.32193	0	0	0	0	1	0	0	0	0	0	0	0	0	0	1.58496	2
ELOVL1	4	3.70044	4.08746	3.45943	2.80735	3	3.80735	3.80735	3	2.58496	2.80735	2	3.16993	2.32193	1	0	0	2	2.58496	0	1	0	1.58496	0	3.90689	2.32193
ELP2	0	0	0	0	0	0	0	0	0	0	0	0	0	0	0	0	0	0	0	1.58496	0	0	0	1	0	0
ELP5	0	0	0	0	2.80735	0	0	0	0	0	0	2	0	0	0	0	0	3	0	1	0	0	0	0	0	0
ELP6	1.58496	3.16993	3.58496	0	3.90689	0	0	0	0	0	0	2	0	0	0	2.32193	0	0	0	0	2	0	0	0	0	1
EMC1	7.19967	8.18982	5.55459	3.80735	8.30834	7.47573	8.61471	6.39232	7.14975	6.32193	7.2384	6.44294	6.02237	0	0	5.24793	5.20945	5.90689	8.11894	3.80735	7.69349	6.24793	7	6.85798	8.18488	6.79442
EMC10	0	4	0	1	2.32193	2.80735	0	0	0	0	0	3	0	0	0	0	0	0	1	0	0	0	0	0	1.58496	2.58496
EMC2	5.32193	5.72792	5.12928	4.75489	5.78136	5.20945	5.90689	4.75489	4.52356	4.08746	4.64386	5.24793	4.75489	0	3.45943	3.70044	3.70044	5.08746	6.06609	4	5.35755	3.45943	5.16993	5.24793	3.70044	4.32193
EMC3	0	4.45943	5	5.75489	6.06609	6.02237	6.89482	5	4.90689	3	4.64386	5.45943	5.58496	0	0	0	3.45943	2.58496	1	4.64386	4.45943	0	3.58496	1	6.08746	5.72792
EMC4	0	4.70044	4.90689	5.83289	5.93074	6.06609	6.44294	5.04439	4.08746	4.70044	4.24793	5.75489	5.24793	0	0	0	2.80735	0	5.58496	3.16993	1.58496	0	0	0	5.88264	4.90689
EMC6	1	2.58496	1.58496	1	2	2.32193	2.80735	3.32193	0	0	0	2.80735	1.58496	0	0	0	1	0	2.32193	0	0	0	0	0	1	0
EMC7	1.58496	5.67243	4.08746	5.20945	5.24793	3.58496	5.39232	5.2854	2.32193	3.90689	4.90689	5.93074	5.55459	0	0	0	2.58496	2.80735	5.08746	4.08746	1.58496	2	1.58496	0	5	5
EMC8	0	3.90689	0	1	4.85798	2	3.90689	3.16993	2	0	3.58496	5.08746	1	0	0	2.32193	0	0	3	0	0	0	0	0	0	2.32193
EMD	3.45943	5.78136	4.80735	6.55459	6.89482	6.82018	6.61471	6.79442	3.32193	6.35755	5.70044	6.53916	3.58496	0	4.80735	5.16993	2	1.58496	5.24793	4.90689	0	5.35755	0	4.75489	5.04439	5.72792
EMG1	2.80735	0	0	1.58496	4.32193	1	4.64386	4.24793	1	1	2.80735	3.16993	0	0	1	0	0	0	0	0	2.32193	3.45943	2.32193	3.90689	2.32193	4.45943
EML2	3	0	5.16993	7.09803	5.08746	8.7039	5.80735	6.45943	5.97728	3	4.58496	3.32193	3.45943	3.70044	3.80735	0	0	0	0	4.58496	3.80735	0	0	0	2.32193	3
EML4	0	5.70044	2	3.16993	6.35755	5.90689	6.9542	5.42626	5.04439	5.08746	5.85798	4.52356	4.52356	0	0	0	3.16993	0	0	3.32193	0	4.85798	0	0	0	0
ENAH	0	1	0	7.5157	2.32193	0	4.80735	3.16993	0	0	0	5.67243	5.52356	0	0	0	0	0	0	1	3	3.32193	3.70044	0	5.75489	0
ENO1	10.3966	11.3359	10.5088	10.9622	11.2952	10.5915	11.1325	10.0375	9.79442	10.3231	10.4645	10.4929	10.6466	8.224	9.97154	9.70044	9.59059	9.62022	9.16742	8.10329	9.35315	9.99435	8.92481	9.20701	10.7903	10.032
ENO2	6.71425	8.13955	7.09803	8.08746	8.76818	8.08215	7.70044	7.02237	6.20945	6.55459	7.70044	7.26679	7.55459	4.32193	6.6865	6.50779	5.64386	5.2854	5.75489	5.24793	6	7.45943	4.16993	5.08746	7.40939	6.83289
ENO3	6.94251	8.66534	7.09803	7.33985	7.94837	8.09276	7.94251	6.53916	4.64386	5.70044	7.60733	7.05528	6.79442	3.45943	4.52356	7.02237	6.30378	6.78136	5.80735	4.39232	5.9542	7.41785	4.75489	4	7.72792	7.05528
ENOPH1	0	5.04439	4.08746	5.12928	5.39232	5.49185	5.24793	4.9542	1	4.75489	5.80735	5.04439	4.16993	0	0	1.58496	2	3	1	4.58496	2.80735	0	0	0	6.55459	5.45943
ENPP4	0	4.32193	5.39232	1.58496	2.32193	1	4.75489	4.80735	4.64386	0	1	1	2.32193	2	0	1	2.32193	3	0	0	1.58496	0	1	3	3.90689	4
ENSA	0	2.80735	2.32193	4.08746	3.58496	2.32193	4.45943	2.32193	0	3.45943	2.80735	3	3	0	0	2.58496	0	0	0	4.08746	0	0	0	0	2.32193	0
ENTPD2	3.16993	0	0	0	2.32193	6.90689	6.42626	0	0	3.70044	4.39232	1.58496	0	0	0	0	0	0	0	0	0	0	0	0	5.04439	0
ENTPD4	0	0	0	0	0	0	0	0	0	0	0	0	0	0	0	0	0	0	0	0	0	0	0	0	0	3.32193
ENTPD5	0	0	0	0	6.71425	5.72792	0	1.58496	0	6.10852	6.44294	0	0	0	0	0	0	1.58496	0	0	4.08746	0	0	0	3.80735	0
ENY2	0	3.45943	2	4.70044	4.90689	1.58496	4.85798	3	0	0	4.85798	4.80735	3.90689	0	0	0	0	0	0	0	0	0	3.16993	0	0	2.80735
EPB41	0	0	0	0	4.75489	2	5.32193	0	0	0	0	0	0	0	2.80735	0	0	0	6.12928	3.80735	0	0	0	0	0	0
EPB41L1	5.20945	4.32193	0	5.88264	6.64386	8.84549	9.38586	7.94837	4.9542	8.2384	8.84862	7.94837	6.72792	0	2.58496	0	0	2.32193	5.88264	7.17991	4.90689	5.24793	3.90689	5.42626	4.32193	6.87036
EPB41L2	3.70044	7.96	6.52356	7.74819	3.58496	7.13955	8.88874	6.2854	0	7.35755	5.78136	7.69349	6.76818	0	0	5.67243	2.80735	0	0	6.72792	0	5.16993	3.90689	0	5.85798	8.33539
EPB41L3	2.32193	9.53916	7.18982	4.08746	5.58496	6.30378	7.26679	7.32193	3.45943	4.52356	6.12928	3.32193	5.16993	0	4.24793	8.43045	4.70044	6.79442	5.45943	3.80735	0	3.16993	0	4.90689	6.55459	6.22882
EPB42	0	0	0	0	4.70044	0	0	0	0	0	0	0	0	0	0	0	0	3.80735	6.49185	3.80735	0	0	0	0	0	0
EPCAM	6.42626	0	4.52356	6.10852	5.58496	7.96	8.18982	7.59991	4.85798	6.6865	7.55459	6.89482	6.6865	0	0	3.58496	0	0	5.58496	7.21917	3	5.2854	5.70044	5.39232	5.83289	6.88264
EPGN	0	0	0	0	0	0	0	0	0	0	0	0	0	0	0	0	0	0	0	0	0	0	0	0	0	0
EPHA4	1	1.58496	1	0	4	0	0	0	0	4	0	0	0	0	0	4.24793	0	0	0	0	0	0	0	1.58496	0	0
EPHA6	0	0	0	0	2	0	3	4.08746	0	0	3.16993	0	3.70044	0	0	0	0	0	3.45943	0	0	0	0	0	0	0
EPHX1	6.24793	7.8009	6.85798	8.03892	8.09803	7.2854	7.94251	6.90689	6.08746	5.90689	6.52356	4.70044	6.90689	2.80735	1.58496	5.72792	5.24793	6	7.14975	6.2854	8.3443	7.35755	5.78136	4.58496	7.41785	5.32193
EPHX2	0	0	2.58496	3.45943	5.35755	7.15987	6.12928	4.80735	3.90689	7.74819	6.70044	3.58496	4.39232	0	0	0	0	0	0	7.05528	0	0	0	0	5.12928	7.30378
EPM2A	0	0	0	0	2.58496	0	1	0	0	0	2.32193	1.58496	0	0	0	0	0	0	0	0	0	0	0	0	0	0
EPM2AIP1	0	3.45943	0	3.80735	3.16993	0	3.58496	0	0	0	0	0	0	0	0	0	0	0	0	0	0	1.58496	0	0	0	0
EPPK1	9.64386	8.01681	0	8.37069	12.0403	10.5488	10.6375	10.3565	10.8556	11.0868	11.0362	10.4605	11.2046	0	7.04439	7.57743	5.80735	5.70044	10.9901	6.62936	9.51964	6.52356	8.34873	9.92184	10.0607	6.49185
EPRS	6.42626	9.07146	7.29462	9.92184	8.75822	9.35315	9.70908	8.67243	7.61471	7.83289	8.08746	9.32643	8.64024	4.39232	6.26679	6.22882	5.80735	3.32193	8.29921	6.71425	5.93074	4.64386	5.67243	3.90689	9.12928	7.92481
EPS15L1	0	5.97728	0	6.71425	3.90689	5.83289	5.75489	5.20945	6.06609	5.83289	6.40939	2.80735	4.90689	0	2.80735	5	4.32193	0	0	0	3.16993	4.08746	4.16993	0	6.06609	5.85798
EPS8	2.58496	6.10852	0	0	3.80735	5.42626	7.06609	6.20945	4.32193	3.90689	5.2854	6.53916	4.58496	0	0	1	4.16993	0	1	0	3.32193	4.9542	0	0	4.16993	7.42626
EPS8L2	5.72792	0	0	5.72792	3.32193	5.52356	4.90689	4.75489	0	4.90689	3.16993	0	1	2.80735	0	0	0	0	6.18982	3.58496	5.20945	4.39232	0	5.04439	0	5.49185
EPS8L3	4.45943	0	0	3	5.52356	6.24793	5.80735	2.58496	5.45943	0	6.10852	3.16993	5.39232	0	0	0	0	0	0	0	3.16993	0	0	0	0	5.32193
EPX	5.45943	3.45943	0	3.80735	7.44294	3	0	0	5.90689	0	0	0	0	6.44294	8.70044	0	6.94251	5.64386	0	0	4.24793	0	4.16993	2.32193	1	0
ERAL1	2	0	0	0	1	1	0	2	0	0	0	0	0	0	0	0	0	0	0	0	0	0	0	0	2	2.80735
ERAP1	6.32193	9.15735	7.53916	8.15987	6.89482	8.31288	8.77808	8.8857	8.13955	7.66534	7.70044	6.33985	8.35755	5.20945	6.39232	6.78136	7.20945	7.08746	5.04439	5.97728	5.75489	4.58496	4.16993	4.08746	7.70736	7.22882
ERAP2	7.66534	8.17493	8.89482	2.58496	5.83289	0	0	0	0	5.2854	7.27612	0	5.45943	0	3.45943	7.24793	6.52356	5.93074	0	0	0	0	4.90689	3.58496	6.47573	6.39232
ERAS	0	0	1	0	1	0	0	0	0	0	0	0	2	0	0	0	2	0	0	0	0	0	0	0	0	0
ERCC2	4.80735	5.70044	0	0	5.35755	3.80735	6.33985	6.10852	3.45943	0	4.39232	4.45943	2.32193	0	0	2.80735	1.58496	0	2	2.32193	3.45943	5	3.16993	5.24793	4.24793	0
ERGIC1	0	6.59991	5.58496	6	4.64386	6.94251	6	6.64386	5.58496	4.85798	6.42626	5	6.75489	2.58496	2.32193	4.45943	0	2.58496	5.49185	5.88264	4.32193	4.08746	1.58496	1.58496	6.55459	5.52356
ERGIC2	0	4.90689	4.45943	4.08746	5.97728	5.16993	6.74147	5.2854	5	4.39232	4.52356	3.80735	3.80735	0	0	0	3.70044	1.58496	3.58496	0	4.52356	3.70044	2.58496	2.58496	4.45943	6.52356
ERGIC3	1.58496	5.12928	5.97728	5.08746	6.32193	5.12928	7.19967	6.62936	3.70044	3	4.85798	3.32193	3.70044	0	0	0	0	0	1.58496	0	0	4.80735	0	0	0	5.42626
ERH	5	5.52356	4.08746	4.08746	4.45943	5	3.80735	6.06609	6.35755	3.80735	4.75489	4.58496	4.24793	4.16993	4.32193	4.32193	2	4.24793	4.45943	2.32193	4.80735	4.24793	4.58496	2.58496	3.32193	2.32193
ERI1	0	0	0	0	4.85798	0	0	3.16993	0	0	0	3.45943	0	0	0	0	0	0	0	0	0	0	0	0	0	0
ERICH1	1.58496	0	0	0	3.58496	0	0	0	1.58496	0	0	0	0	0	0	0	0	0	0	0	0	0	0	0	0	0
ERICH6	0	1	0	0	0	0	0	0	0	0	1	0	0	0	0	0	0	0	0	0	0	0	0	0	0	0
ERLIN1	5.55459	6.35755	5.20945	5.9542	7.08746	6.50779	7.40939	6.94251	3.70044	5.04439	6.96578	6.14975	6.50779	0	4	4.75489	4.16993	4.9542	7.01123	6.35755	4.24793	4.9542	3.58496	4.16993	5.72792	7.21917
ERLIN2	6.52356	7.44294	5.32193	6.08746	8.67596	8.20945	8.51175	7.83289	6.18982	7.61471	7.86419	6.67243	7.5157	0	4.45943	6.14975	5.97728	5.97728	9.20701	7.54689	5.93074	6.65821	5.16993	5.58496	6.59991	7.42626
ERMARD	0	0	0	0	1.58496	0	2	0	0	0	0	0	0	0	0	0	0	0	0	0	0	0	0	0	0	1
ERMP1	5.70044	3.80735	6.20945	7.59246	6.20945	7.83289	7.52356	6.2854	6.56986	6.35755	6.98868	5.35755	6.18982	0	0	0	4.80735	0	7.8392	6.42626	1.58496	0	0	0	6.35755	6.47573
ERN2	0	0	0	0	0	4.75489	3.58496	5.16993	3.16993	3.90689	5.67243	0	0	0	0	0	0	0	0	0	2.80735	0	0	0	4.58496	0
ERO1A	6.80735	7.76155	7.9542	9.00562	7.7879	8.93664	9.28309	7.64386	8.31288	5.97728	8.83605	8.40514	8.89178	4.75489	6.26679	6.88264	5.72792	6.87036	9.24793	7.45121	6.33985	7.70736	6.14975	7.21917	7.97728	5.9542
ERO1B	1.58496	2.58496	1	2.58496	2.58496	3.90689	4.52356	2	4	0	4.64386	2.58496	4.08746	0	2	0	0	1	5.20945	1	2	2.58496	4.16993	2	2.32193	0
ERP29	5.72792	8.17493	6.94251	7.83289	6.80735	6.26679	7.22882	7.13955	4.90689	6.22882	7.2854	7.18982	7.30378	4.16993	5.55459	6.97728	4.80735	5.80735	7.2854	2.80735	4.90689	4.9542	5.24793	4.64386	6.67243	6.55459
ERP44	5.08746	7.3837	7.40088	6.44294	7.2854	7.2854	7.6865	7	4.75489	6.18982	5.85798	6.39232	6.53916	2.32193	5.52356	5.78136	5	5.75489	6.35755	5.39232	5.39232	4.75489	5	4.45943	6.02237	5.58496
ERVK3-1	0	0	0	0	1.58496	3.32193	4.52356	0	0	0	0	0	0	0	0	0	0	0	0	0	0	0	0	0	0	0
ESAM	0	0	0	0	1	1	0	0	3.45943	0	0	0	0	0	0	0	0	0	0	0	0	0	0	0	0	0
ESD	0	7.34873	5.08746	6.47573	5.32193	6.79442	6.98868	6.90689	5.45943	4.75489	6.40939	7.26679	6.89482	0	4.58496	4.39232	4.64386	4.9542	2.58496	4.58496	2.32193	4.58496	3.16993	3.70044	5.20945	6.52356
ESF1	0	0	0	0	5.45943	0	5.24793	0	0	0	5.52356	0	0	0	0	0	0	0	0	0	0	0	0	0	0	0
ESRRA	1	0	0	1	5.2854	2.32193	2.80735	2	0	3.58496	3.58496	2	0	0	0	0	0	0	1.58496	0	2.80735	0	2.58496	0	1	0
ESRRB	0	0	0	0	2	0	3.16993	0	0	0	1	0	0	0	0	0	0	0	0	0	2.32193	0	0	0	0	0
ESYT1	7.96578	9.25503	9.18982	8.70736	8.58871	9.01959	9.09803	8.3443	7.87652	7.79442	8.8857	8.3966	7.70736	3.45943	6.14975	7.59991	7.60733	7.01123	6.9542	6.71425	6.61471	7.93074	6.53916	6.98868	8.65105	7.93664
ESYT2	5.70044	8.05528	7.80735	8.41363	7.44294	9	9.59805	7.33985	6.08746	8.46352	9.55842	9.05257	8.2384	0	4.32193	5.83289	3.45943	2.80735	7.17991	5.72792	4.32193	7.06609	4.52356	0	8.10852	6.62936
ETFA	8.09803	9.2854	8.33985	6.37504	10.1624	9.72281	9.53916	9.5812	8.43463	8.62205	9.29921	8.36632	7.9542	3.45943	6.65821	6.76818	7.53916	7.22882	8.79442	6.98868	8.38802	7.40939	7.37504	6.37504	7.87036	8.14466
ETFB	1.58496	7.06609	5.97728	3.45943	8	7.08746	7.44294	8.09803	6.55459	6.02237	8.32193	7.6865	7.15987	0	4.85798	5.12928	3.45943	4.39232	6.49185	4.64386	4.75489	4.39232	3.70044	2	6.44294	6.32193
ETFDH	0	4.39232	0	3.70044	3.90689	6.97728	3.16993	4.24793	0	4.85798	4.80735	0	4.08746	0	3.90689	4.64386	0	0	3.16993	0	0	0	0	4.24793	4.64386	4.70044
ETFRF1	1	0	0	0	3.16993	0	0	0	0	0	4.80735	0	0	0	0	0	0	0	0	1.58496	0	0	0	0	0	0
ETHE1	3.58496	5.64386	5.58496	5.49185	5.42626	6.22882	7.10852	7.25739	5.78136	6.83289	7.75489	6.33985	5.72792	2.58496	5.42626	5.04439	3.90689	5.2854	6.14975	6.33985	3.58496	4.85798	3.16993	3.80735	4.75489	5.90689
ETNK1	0	2.32193	0	0	2	3.16993	5	3.32193	3.70044	0	2.58496	5.04439	3.45943	0	0	0	0	0	0	0	0	0	0	0	3.80735	1
ETNK2	0	0	0	0	3	0	0	0	0	0	0	0	0	0	0	0	0	0	0	0	0	0	0	0	0	0
ETV2	0	0	0	0	1	1	0	0	0	0	0	0	0	0	2	0	0	2.80735	0	0	0	0	0	0	0	0
ETV6	0	5.24793	0	0	1.58496	3.16993	4	3.58496	1.58496	2.80735	3.45943	3	2.32193	0	0	0	0	0	0	0	0	2.58496	0	0	2.32193	2.58496
EVI2A	0	0	3.16993	0	0	0	0	1	0	0	1	0	0	1	0	0	0	0	0	0	0	0	0	0	0	0
EWSR1	4.70044	7.42626	5.78136	5.2854	7.32193	6.52356	7.96	7.29462	5	5.64386	6.04439	5.16993	5.70044	3.16993	5.83289	6.04439	5.67243	5.64386	6.35755	7.18982	6.20945	5.70044	5.88264	5.85798	5.35755	5.83289
EXD3	0	2	0	0	1	0	0	0	0	0	0	0	0	0	2.58496	0	0	0	0	0	0	0	0	0	0	0
EXOC1	4.64386	5.90689	4.70044	3.32193	4.85798	5.45943	6.14975	4.52356	3	4.64386	3.45943	5.16993	4.08746	3.45943	0	2.58496	2	4.32193	4.70044	3.45943	3.58496	0	3.16993	0	4.45943	3.70044
EXOC2	0	4.64386	0	3	3.45943	0	4.45943	0	3	0	3.45943	0	3	0	0	0	0	0	0	2.80735	0	0	0	0	3.80735	0
EXOC3	0	5.61471	4.45943	4.70044	4.85798	0	7.16993	6	0	3.70044	4.90689	6.20945	5.39232	0	2.58496	3.32193	3	2.58496	5.12928	3	0	0	0	0	5.64386	2.32193
EXOC3L4	1	0	0	0	1.58496	0	0	0	0	0	0	0	0	0	0	0	0	0	0	0	0	0	0	0	0	0
EXOC4	3.16993	6.78136	4.75489	5.83289	5.52356	6.42626	6.65821	6.08746	4.90689	6.14975	5.2854	5.83289	5.12928	0	0	3.58496	3.45943	3.58496	3.45943	4.45943	4.80735	3.90689	3.45943	0	5.42626	3.45943
EXOC6B	3.45943	5.35755	0	0	7.30378	4.52356	6.44294	0	0	4.24793	2.80735	4	0	0	0	0	0	0	4.08746	3.45943	4.52356	0	0	0	4.39232	0
EXOC7	0	6.50779	5.08746	6.44294	4.24793	6.71425	5.88264	6.67243	4.75489	0	4.64386	6	5.52356	0	0	0	2	0	2.32193	0	0	2.58496	3.45943	4.80735	4.45943	3.32193
EXOC8	0	6.12928	5.20945	5.85798	5	4.58496	5.58496	4.70044	0	4.64386	5.16993	4.58496	3	0	0	0	2.32193	0	0	3.80735	0	0	0	0	4.39232	4.32193
EXOSC1	2.80735	1.58496	0	3.32193	3.16993	1.58496	2	3.32193	0	3.58496	3	3.45943	1.58496	0	1	0	0	0	1	0	0	0	0	0	3	2.32193
EXOSC10	3.80735	5.08746	0	0	6.26679	4.9542	5.35755	4.52356	4.58496	0	3.45943	0	0	0	2.32193	0	3.32193	3.70044	0	0	3.80735	4	5.08746	4.70044	4	4.39232
EXOSC2	0	4.08746	0	0	4.52356	1	4.64386	5.49185	0	0	0	4.24793	0	0	1	0	0	0	1.58496	0	0	2	0	0	3.70044	3.70044
EXOSC3	0	2	0	1	2	1	3.70044	2.80735	0	0	1.58496	1	0	0	3.45943	0	0	0	1	0	0	3.70044	0	0	1	3
EXOSC5	0	4.64386	0	2	6.04439	4	5.2854	4.9542	0	1	4.75489	3.90689	2.58496	0	0	0	0	1	0	0	0	0	0	0	3.80735	3
EXOSC6	0	3.58496	3.32193	3.80735	5.88264	4.16993	4.9542	5.24793	0	3.58496	4.16993	4.39232	2.80735	0	0	0	0	0	1	1.58496	0	0	1.58496	0	4.08746	3.16993
EXOSC7	3.70044	3.45943	0	0	5	3.45943	2.32193	4.75489	0	3	2	3.58496	0	0	0	2.32193	2	0	0	0	3.32193	2.58496	2.32193	4.16993	3.58496	3.32193
EXOSC9	2.32193	2.32193	2.80735	3.90689	4	5.04439	3.80735	5.39232	3.32193	0	0	4.16993	0	0	0	0	0	0	0	0	0	0	0	0	2	2.58496
EXT2	0	0	0	0	3.45943	0	4.16993	3.32193	0	0	4	0	0	0	0	0	0	0	0	0	0	0	0	0	0	3.16993
EZH1	0	0	2	0	2.80735	0	0	0	0	0	0	0	0	0	0	0	0	1	0	0	0	0	0	0	0	0
EZR	9.04439	9.53528	9.03892	9.11114	9.22641	9.29921	10.0154	9.43045	9.3015	9.35315	9.02791	8.99718	9.74987	5.9542	8.75154	7.52356	7.7211	7.65821	8.33539	6.45943	6.94251	7.48382	7.43463	6.80735	8.73471	7.31288
F11	0	3.90689	0	0	3.80735	2.32193	3.16993	0	0	4	0	0	0	0	0	0	1	0	2.80735	0	0	0	0	0	0	0
F11R	4.64386	5.16993	5.97728	6.84549	5.35755	7.2384	6.94251	6.08746	4.64386	6.32193	5.80735	6.33985	6	3.90689	0	3	3	3	2.80735	4.24793	4.64386	5.42626	4.45943	3.45943	6.04439	5.20945
F13A1	1	9.56986	6.98868	0	7.59246	6.87036	4.64386	7.73471	6.62936	2.80735	6.20945	0	3.16993	0	2.58496	6.55459	7.27612	6.55459	3.90689	2.58496	0	5.52356	0	0	8.03892	4.75489
F2	0	6.18982	0	0	4.45943	0	4.85798	0	0	0	0	0	0	2.80735	0	0	0	5	5.20945	7.74147	2.32193	0	4.39232	0	0	0
FAAH	0	3.32193	0	4.75489	3.58496	4.64386	4.85798	3.32193	2.58496	2	3.45943	2.32193	4	0	0	2.32193	0	0	3.32193	3.90689	0	0	0	0	3.32193	4
FAAP100	0	0	0	2.32193	2	0	2.80735	0	0	2.32193	0	1.58496	2.58496	0	0	0	0	0	0	0	0	0	0	0	0	0
FABP1	4.16993	0	0	0	5.35755	5.75489	0	0	0	7.2384	7.08746	0	2.32193	0	0	0	0	0	0	0	0	0	0	0	0	7.66534
FABP5	6.71425	6.94251	7.35755	4	6.12928	6.74147	6.71425	6.26679	5.93074	7.6865	6.83289	7.07682	6.55459	2.32193	6.32193	6.55459	6.56986	5.42626	4.58496	6.75489	2.32193	4.32193	5.93074	3	6.87036	6.49185
FABP5P3	4.16993	2.80735	4.24793	0	2	2	2.58496	2.80735	2.80735	3.80735	3	3	0	0	2.80735	3.32193	3.70044	2.32193	1.58496	3.58496	0	2.80735	2	0	3.45943	2.80735
FADD	0	2.58496	2.32193	3.32193	3.16993	1	3	2.32193	3.58496	0	2.58496	2.58496	2.80735	0	0	0	0	0	0	0	0	0	0	0	2.32193	2
FADS1	0	2.58496	0	2.58496	2.80735	0	0	0	3.32193	0	0	0	0	0	0	0	0	0	0	0	0	0	0	3.16993	0	0
FAF1	3.32193	4.58496	0	6.14975	5.52356	5.85798	4.32193	5.67243	0	4.52356	4.24793	3.58496	4.39232	0	0	0	2	0	0	1	0	0	0	1.58496	6.02237	4
FAF2	3.58496	6.2854	4.24793	3.32193	7.33985	5.49185	7.02237	5.88264	4	5.55459	6.20945	4.90689	5.42626	0	3	3.32193	3.70044	3.32193	4.75489	4.70044	4.45943	5.35755	3.70044	5.16993	5.80735	4.9542
FAH	3.45943	5.08746	4.24793	6.12928	4.75489	5.2854	5.08746	4.58496	5.9542	2	5.24793	4.08746	0	0	2.58496	0	3.80735	4.58496	2.80735	0	0	2.32193	0	0	3.90689	4.24793
FAHD1	0	5.24793	3.16993	4.16993	4.58496	4.08746	5.80735	3.32193	1.58496	4.39232	5.12928	2.32193	2.58496	0	0	0	0	2	1.58496	0	1.58496	0	1.58496	0	3	4.64386
FAHD2A	3.32193	2.32193	0	2.80735	3.58496	2.32193	4.24793	3.70044	1	0	3	2	0	0	0	0	0	0	3.45943	0	0	0	0	0	3	3
FAHD2B	2.32193	0	0	0	2	0	3.32193	3.16993	0	0	2	1.58496	0	0	0	0	0	0	1	0	0	0	0	0	0	0
FAIM	0	1	0	0	2.80735	0	0	0	0	0	0	0	0	0	0	0	0	1	0	0	0	0	0	0	0	0
FAM103A1	0	1	0	0	2.80735	0	4.24793	1	0	0	0	0	0	0	0	0	0	0	1	2.32193	0	0	0	0	0	0
FAM104A	0	1	0	0	0	0	1.58496	0	0	0	0	0	0	0	0	0	0	0	0	0	0	0	0	0	0	0
FAM105A	0	5.61471	5.42626	0	4.39232	2	5.75489	3.70044	0	2.32193	4.64386	0	0	0	0	0	0	4.24793	0	1	0	0	0	0	4.39232	4.16993
FAM109A	0	0	0	0	0	0	0	0	0	0	0	3.45943	0	0	0	0	0	0	0	0	0	0	0	1	2.32193	0
FAM114A1	0	4	3	5.2854	5.32193	5.70044	6.24793	2.80735	5	5.35755	5.04439	3	6.35755	0	0	0	0	0	4.75489	4.39232	4.45943	5	0	0	4.80735	5.20945
FAM114A2	3.32193	7.13955	5.20945	5.04439	6.22882	5.88264	7.41785	6.02237	4.16993	5.39232	5.24793	5.04439	4.24793	0	4.52356	1.58496	3.58496	0	2.58496	3	2.58496	0	3.90689	0	5.85798	4.45943
FAM118B	0	5.78136	0	0	6.80735	5.04439	6.39232	4.32193	1	3.16993	4.64386	5.16993	4.70044	0	0	0	1	0	0	2.32193	0	0	0	3.16993	5.12928	4.70044
FAM120A	3.45943	7.62936	5.72792	7.79442	5.52356	9.04166	7.91289	7.35755	5.55459	6.47573	6.12928	7.41785	5.49185	0	1	5.64386	2.58496	0	0	0	0	0	0	0	2.32193	0
FAM120B	0	5	0	0	3.16993	3.45943	5.35755	0	0	0	0	0	0	0	0	0	0	0	0	0	0	0	0	0	3.70044	0
FAM122B	0	1.58496	0	0	2.80735	0	3.32193	2.58496	0	3.32193	1.58496	0	3.45943	0	0	0	0	0	0	0	0	0	0	0	2.32193	2.58496
FAM126A	0	2.58496	0	0	4.90689	0	3.45943	2.32193	0	0	2.80735	0	0	0	0	0	0	0	0	0	0	0	0	0	0	0
FAM129A	3.16993	7.80735	6.53916	6.10852	3.80735	4.39232	3.45943	5.2854	3	4	3.70044	5.45943	0	4.08746	4.16993	4.80735	3.45943	4.58496	3.16993	0	0	0	2.58496	0	4.85798	3.32193
FAM129B	6.12928	6.42626	4.24793	7.36632	5.72792	7.71425	7.88874	7.74147	5.75489	7.96	6.78136	7.21917	7.07682	0	4.64386	4.52356	4.90689	3.45943	6.02237	7.18982	4.45943	4.64386	0	4.39232	6.24793	7.37504
FAM134A	0	1	2.58496	1.58496	1.58496	2.58496	4.39232	2	2	1	2.80735	3.58496	0	0	0	0	1.58496	1.58496	0	3.32193	1	0	0	0	4	4.45943
FAM134B	0	0	0	3	5.16993	0	2	0	0	0	0	0	0	0	0	0	0	0	0	0	0	0	0	0	0	2.58496
FAM134C	1	5	4.9542	4.64386	4.75489	4.75489	4.9542	5.85798	4.9542	3.58496	5.16993	5.2854	4.64386	2.32193	0	3.32193	4.39232	4.08746	2	3.70044	4.39232	3.45943	4.24793	0	4.75489	4.70044
FAM135B	0	3.70044	1	1	3.90689	2.80735	0	0	0	0	0	0	0	0	0	0	0	0	0	0	2	0	0	3	0	0
FAM136A	4.70044	5	4.75489	4.52356	6.62936	6.10852	6.02237	5.52356	1	6.49185	5.75489	5.20945	4.08746	0	3.70044	3.70044	2	4.45943	4.32193	0	0	3.32193	3.58496	0	5.2854	5.70044
FAM13C	0	0	0	0	1	0	0	0	0	0	0	0	0	0	0	0	0	2.80735	0	0	0	0	0	0	0	0
FAM149A	0	0	0	0	1.58496	0	0	0	1.58496	3	1	0	1	0	0	0	0	1.58496	0	1	0	0	0	0	0	0
FAM160B1	0	4.9542	2.80735	0	4.32193	3.32193	4.24793	1.58496	2.80735	3.58496	0	0	2.80735	0	0	0	0	0	0	0	2.32193	0	0	0	0	0
FAM162A	2	3.16993	4.52356	4.16993	6.12928	5.2854	5.12928	5.2854	4.32193	2.80735	5.93074	5.24793	4.85798	0	2	0	1	1	0	0	0	3	1.58496	3.58496	2.80735	5.55459
FAM172A	0	0	0	0	1	5.08746	0	2.32193	0	0	0	0	0	0	0	0	0	0	0	0	0	0	0	0	0	0
FAM174B	0	0	0	0	0	0	0	0	0	0	0	0	0	0	0	0	0	0	0	0	0	0	0	0	0	1.58496
FAM177A1	1.58496	1.58496	2.32193	3.45943	6.50779	4.24793	4.80735	3.16993	1	0	7.07682	1.58496	0	0	0	0	0	0	1	0	0	2.58496	0	0	3.58496	4.75489
FAM179B	0	0	0	0	4.08746	2.32193	0	0	0	0	0	0	0	0	0	0	0	0	0	0	0	0	0	0	0	0
FAM183A	0	1.58496	0	0	1	0	0	0	0	0	0	0	0	0	0	0	0	1.58496	0	0	0	0	0	0	0	0
FAM186A	0	0	0	0	3.45943	0	0	0	0	0	0	0	0	0	0	0	0	0	0	0	0	0	0	0	0	0
FAM188A	0	1.58496	0	5.75489	1	3.16993	3.45943	2.80735	0	1.58496	2	3.90689	4	0	0	0	0	0	0	2	0	0	0	0	0	0
FAM189B	0	0	0	0	0	0	0	0	0	0	0	0	0	0	0	0	0	0	0	0	0	0	0	0	0	0
FAM192A	0	2.32193	2	2.32193	1.58496	2.32193	4.58496	3.32193	0	3.58496	2.80735	5	0	0	0	2	0	0	1	1.58496	0	1	0	0	2.32193	3.45943
FAM20B	0	3.16993	2.80735	3.70044	4.9542	3.32193	4.16993	3.16993	1	0	2.80735	3.32193	3.58496	0	2	0	0	0	4	2.32193	2.80735	0	0	0	2.80735	4
FAM210A	2.58496	2	0	2	4.08746	2	2.80735	0	3.16993	0	2.58496	3.45943	2.32193	0	0	0	2	0	3.80735	0	0	0	0	0	0	1.58496
FAM210B	0	2	0	2	3.80735	2.32193	3.90689	2	0	2	3	0	0	0	0	2	0	0	0	2.32193	1	2	0	0	1	2.32193
FAM213A	0	3.32193	2.32193	7.04439	6.65821	3.45943	3.90689	4.90689	3.58496	5.88264	6.26679	4.39232	5.2854	0	0	2.32193	2	0	6.35755	4.58496	2.32193	3.16993	3	0	1.58496	3.90689
FAM213B	0	0	0	4.64386	3.45943	5.16993	5.85798	0	3.80735	4.08746	4.32193	0	3.32193	1.58496	1	0	0	0	0	4.58496	0	0	0	2.80735	4.24793	0
FAM214A	0	0	0	0	0	0	0	0	0	0	0	0	0	0	0	0	0	0	4.45943	0	0	0	0	0	1	0
FAM217A	0	0	1	0	0	0	0	0	0	0	0	0	0	0	0	0	0	0	0	0	0	0	0	0	0	0
FAM21A	6.06609	8.53528	6.30378	6.20945	5.35755	6.20945	8.12412	7.25739	0	6.24793	6.88264	6.55459	6.06609	0	5.9542	6.88264	5.58496	6.14975	4.24793	4.24793	5.12928	5.61471	0	4.9542	6.2854	6.37504
FAM21C	5.90689	9.17742	6.49185	6.49185	5.58496	6.02237	8.2384	7.46761	0	5.9542	7.48382	6.61471	6.06609	0	3.80735	6.80735	5.32193	6.32193	4.52356	4.75489	4.80735	5.9542	0	4.45943	6.12928	5.64386
FAM234B	0	0	0	0	2	0	0	0	0	0	0	0	0	0	0	0	0	0	0	0	0	0	0	0	0	0
FAM3A	0	4.16993	1	3.45943	4.58496	4.75489	5.2854	4.24793	1.58496	1	4.32193	1.58496	4.32193	0	0	0	0	0	3.32193	1.58496	3.45943	0	0	2.80735	3.45943	3.80735
FAM3C	4.80735	4.9542	4.32193	6.22882	6.49185	6.6865	6.10852	6.04439	5.35755	5.9542	5.45943	5.35755	5.61471	0	0	2.80735	1.58496	3.45943	5.78136	4.58496	3.70044	4.90689	2.80735	3.58496	5.9542	4.39232
FAM3D	1	0	0	2.58496	3.16993	5.35755	7.03342	5.16993	4.90689	0	5.72792	6.24793	4.9542	0	0	0	0	0	0	6.49185	3.58496	0	0	0	0	5
FAM46A	0	1.58496	0	0	3.32193	1	0	0	0	0	0	1.58496	0	0	1	0	1.58496	0	0	0	0	0	0	0	0	0
FAM49A	4.16993	7.42626	5.70044	4.39232	4.08746	3.90689	5.42626	4.64386	3.58496	3	4.58496	2	4.08746	0	3.58496	4.9542	4.85798	4.70044	0	2.32193	4	2	2.80735	3.16993	5.08746	3.70044
FAM49B	6.91886	9.76155	8.09276	6.49185	6.83289	7.2854	8.07146	7.46761	7.06609	6.53916	7.08746	6	6.62936	6.24793	7.05528	7.2854	7.87652	7.78136	5.55459	6.22882	5.52356	5.78136	6.75489	6.76818	8.21432	7.2384
FAM50A	0	0	1	4.70044	2.58496	4.52356	5	4.24793	0	4.24793	4.85798	5	3.58496	0	0	2	0	0	0	0	0	0	0	0	4.08746	2.58496
FAM60A	0	0	0	0	0	0	1	0	0	0	0	0	0	0	0	0	0	0	0	0	0	0	0	0	0	0
FAM65A	4	4.08746	0	0	1	3.58496	2.32193	2	0	0	0	0	0	0	0	0	0	0	0	0	0	0	0	0	0	0
FAM71D	0	1.58496	0	1	3.32193	0	0	0	0	0	2.32193	0	0	0	0	0	0	0	0	0	0	0	0	0	0	0
FAM71E1	0	2	0	0	2.80735	0	0	0	0	0	0	0	1	0	0	0	0	0	0	0	0	0	0	0	0	0
FAM71F1	0	0	0	0	3	0	0	0	0	1.58496	0	0	0	0	0	0	0	0	0	0	0	0	0	0	0	0
FAM76A	0	0	0	0	0	0	0	0	0	0	0	0	0	0	0	0	0	0	0	0	0	0	0	0	0	0
FAM78A	0	0	0	0	1	0	0	0	1	0	0	0	0	0	0	0	0	0	0	0	0	0	0	0	0	0
FAM81B	0	1	0	0	2.32193	0	0	0	0	3	0	0	1	0	0	0	0	1	0	0	2.32193	0	0	0	0	0
FAM83H	0	0	0	6.97728	6.75489	6.78136	7.64386	6.02237	0	7.08746	6.53916	6.2854	5.2854	0	0	0	0	0	4.64386	6.16993	0	0	0	0	4.64386	5.52356
FAM89B	0	0	0	0	3.32193	0	0	0	0	0	2.80735	0	0	0	0	0	0	0	0	0	0	0	0	0	0	0
FAM91A1	3.45943	4.75489	3.16993	4.39232	4.85798	3.90689	5.9542	5.93074	4.08746	4.9542	0	0	4.39232	0	0	0	2.32193	0	2.80735	0	0	0	0	0	3.70044	3.80735
FAM96B	0	4.75489	2.58496	1.58496	3	1	1.58496	3.90689	2	2	3.70044	3.70044	2.80735	0	4	0	2.32193	1.58496	1.58496	0	0	0	2.58496	0	1.58496	3.45943
FAM98B	0	6.32193	3.90689	4.70044	5.49185	6.22882	6.40939	5.78136	5.16993	1.58496	5.64386	3.58496	4.9542	2.32193	3.32193	4.70044	2.80735	0	5.39232	3.16993	4.24793	4.90689	4.64386	2.32193	5.45943	4.52356
FAM98C	0	4.70044	0	1.58496	2	0	0	0	0	0	3	0	0	0	0	0	2	0	1.58496	0	0	0	0	0	0	0
FANCA	0	3.80735	1	0	5.04439	1.58496	4.24793	0	3.45943	3	1.58496	1	3.32193	0	0	0	0	0	0	0	0	3.32193	0	2	2	0
FANCI	0	0	0	0	7.2384	5.52356	5.49185	5.61471	0	0	0	0	0	0	0	0	0	0	0	0	0	0	0	0	4.9542	0
FANCM	0	0	0	4.90689	1.58496	0	0	0	0	2.32193	0	0	2.80735	0	0	0	0	0	0	0	0	0	0	0	3.16993	0
FAR1	0	5.12928	3.80735	0	4.58496	0	4.39232	2.32193	0	0	3	2	1	0	0	1.58496	3.45943	2	0	0	0	1	1.58496	3.32193	3	0
FARS2	0	1.58496	0	0	3.90689	2	2.32193	3	0	0	0	2.80735	0	0	0	0	0	0	1.58496	0	2.32193	0	0	0	2.32193	3.16993
FARSA	5.83289	6.67243	3.80735	6.24793	7.34873	8.16491	8.62571	6.08746	7.01123	6.70044	6.14975	7.53916	5.12928	0	3.90689	4	4.08746	3.58496	4.9542	3.45943	4.16993	5.67243	4.32193	4.75489	7.12928	6.22882
FARSB	0	5.16993	0	6.67243	6.02237	7.66534	7.81378	6.14975	7.15987	0	6.45943	7.55459	3.45943	0	0	0	4.45943	0	0	0	3.32193	3.45943	3	3.16993	7.33985	7.25739
FASN	9.22641	6.04439	7.26679	11.4409	6.59991	10.8471	9.16742	8.93074	8.85487	8.2384	8.03342	9.11634	8.36194	0	4.16993	6.45943	5.70044	0	6.88264	5.42626	0	4.58496	7.48382	9.16491	8.9629	8.24317
FASTKD1	0	0	0	0	4.9542	4.08746	4.75489	0	0	0	0	0	0	2	0	0	0	0	0	0	0	0	0	0	0	4.39232
FASTKD2	2	3.16993	0	0	4.24793	3.90689	4.08746	2.32193	3.32193	3.70044	4.32193	2	0	0	0	0	0	0	2.32193	0	0	0	2.58496	5	0	3.90689
FASTKD5	0	3.58496	0	0	5.32193	0	5.58496	4.08746	2.32193	3.70044	3.90689	0	0	0	0	0	0	0	0	0	0	0	0	4.32193	0	3.70044
FAT2	0	0	0	0	4.75489	0	0	0	0	0	0	0	0	0	0	0	0	0	0	0	0	0	0	0	0	0
FAU	0	0	0	0	0	0	3.80735	0	0	0	0	0	0	0	0	0	0	0	0	0	0	0	0	0	0	0
FAXC	0	0	0	0	2	0	0	0	0	0	0	0	0	0	0	0	0	0	0	0	0	0	0	0	0	0
FBF1	0	4.64386	0	0	2.80735	4.45943	1	2.32193	3	0	0	0	0	0	0	0	0	0	0	0	0	0	0	0	0	0
FBL	4.08746	7.2854	6.53916	6.87036	8.84549	6.88264	8.98868	8.59619	5.52356	7.14975	8.63662	8.11374	6.78136	0	2.32193	5.45943	3.32193	0	7.57743	6.50779	3.58496	6.50779	4.9542	5.55459	6.26679	7.9542
FBP1	2	8.49985	8.30378	7.5157	3.58496	8.55842	7.16993	7.02237	6.18982	6.83289	5.67243	5.16993	6.65821	0	6.24793	6.44294	6.20945	6.40939	5.78136	7.16993	5.78136	3.70044	2.32193	0	7.18982	6.65821
FBXL15	0	1	0	0	1	0	0	0	0	0	0	0	0	0	0	0	0	0	0	0	0	0	0	0	0	0
FBXL18	0	0	0	0	5.08746	2.80735	4.45943	0	0	0	0	0	0	0	0	0	0	0	0	0	0	0	0	0	0	0
FBXL8	0	0	0	0	2	0	1.58496	0	0	0	0	0	0	0	0	0	0	0	0	0	1.58496	0	1	0	0	0
FBXO16	0	0	0	0	1.58496	0	0	0	0	0	0	1.58496	0	0	1	0	0	0	0	2	0	0	0	0	0	1.58496
FBXO28	0	2.32193	0	0	2.80735	0	1	2.80735	0	0	0	0	0	0	0	0	0	0	0	0	0	0	0	0	0	2
FBXO3	0	0	0	0	4.39232	0	0	0	0	0	0	0	0	0	0	0	0	0	0	0	0	0	0	0	0	3
FBXO44	0	0	0	0	3.80735	0	0	0	0	0	0	0	0	0	0	0	0	0	0	0	0	0	0	0	0	0
FBXO8	0	0	0	0	1	0	0	0	0	0	0	0	0	0	0	0	0	0	0	0	0	0	0	0	0	0
FBXW9	0	0	0	0	1.58496	0	0	0	1.58496	0	0	0	0	0	0	0	0	0	0	0	0	0	0	0	0	0
FCAR	5.64386	3.32193	0	0	2.58496	0	1	2.58496	3.45943	0	2.32193	0	0	6.65821	1	0	3	4.24793	3.70044	0	2.58496	0	3	2.58496	0	0
FCER1G	4.39232	6.6865	6.26679	1	3.80735	4.90689	4.52356	6.14975	4.75489	3.16993	3.58496	1	4.08746	0	2.80735	4.24793	3.58496	4.52356	2.58496	1	2.32193	2.58496	3	3	4.08746	3.16993
FCGR1A	1.58496	8.07146	3.70044	0	2.80735	0	4.39232	4.16993	0	0	0	0	0	0	0	4.52356	4.9542	5.35755	0	1.58496	0	1.58496	4.24793	2.58496	5.35755	3.16993
FCGR2A	1	6.22882	5.58496	1	1	3.58496	3.16993	3.70044	3	2.80735	3.90689	0	4.32193	1.58496	1	3.16993	1.58496	3.58496	1	2.80735	1.58496	0	0	0	4.90689	0
FCGR2B	1	5.49185	4.08746	2	4.45943	3.16993	4.64386	3.70044	0	2.58496	5.04439	0	2.80735	0	1.58496	3.58496	0	1	1	2	0	2.32193	0	0	4.90689	2.58496
FCGR2C	0	6.32193	5.24793	0	1.58496	5	4.32193	4.9542	0	4.24793	4.75489	0	4.64386	1.58496	1.58496	3.32193	2	0	1.58496	2.32193	0	1.58496	0	0	5.61471	0
FCGRT	2	8.80413	8.77479	1	6.18982	6.08746	7.6865	7.67948	4.75489	5.70044	7.11894	4.39232	4.85798	3.45943	0	6.26679	6.98868	5.49185	4.64386	5.16993	2.58496	5.78136	3.32193	2.32193	7.59991	6.40939
FCHSD2	0	0	0	0	0	0	0	0	0	0	0	0	0	0	3.45943	0	1	0	0	0	0	0	0	0	0	0
FDFT1	5.85798	5.45943	0	7.42626	11.2621	0	6.80735	7.94251	3.70044	5.78136	6.71425	4.75489	4.45943	0	0	3.45943	2.32193	0	4.16993	2.58496	7.65821	4.08746	2	8.37938	6.90689	7.25739
FDPS	5.83289	6.94251	4.64386	7.29462	6.58496	6.26679	6.33985	4.85798	5.24793	5.42626	4.80735	6.18982	5.20945	0	2.32193	3.45943	4.24793	4.39232	3.58496	4.58496	6.10852	3.80735	2.80735	4	7.01123	4.80735
FDXR	4.32193	5.20945	5.93074	0	5.35755	7.35755	6.20945	7.93074	3.16993	8.45533	6.89482	5.55459	2.80735	0	5.90689	0	0	0	0	0	2	5.08746	3.16993	0	0	9.00282
FECH	0	3.32193	0	0	2.32193	1.58496	0	4.64386	0	0	3.70044	0	2	0	0	0	0	3	0	0	0	0	0	0	2	0
FEN1	0	4.32193	2	4.58496	4.70044	5.32193	4.64386	6.16993	5.32193	0	4.45943	5.80735	2	4	3.58496	3.70044	3	4.39232	1	0	3.45943	4.52356	5.16993	3	4.75489	3.45943
FES	2.32193	7.93664	5.83289	0	1	0	2	3	0	2.32193	0	0	0	0	0	3.90689	4.58496	1.58496	2	0	0	0	2	1	0	0
FEZ2	3	0	2.32193	2.58496	1	0	1.58496	1.58496	0	0	2.32193	0	0	0	0	0	0	0	0	0	1	0	0	0	0	0
FGA	9.3966	8.8392	10.1737	8.14975	12.2255	4.75489	5.64386	8.49185	9.2503	8.61471	3.45943	2.80735	4.90689	0	7.82018	6.56986	5.72792	7.89482	9.90689	9.07414	0	9.8392	8.59619	0	4.58496	0
FGB	9.2854	9.76487	10.9403	7.88874	12.6138	4.80735	6.64386	8.93074	9.90388	9.04985	4.39232	3	3.90689	3.16993	8.03892	5.55459	7.40088	9.3015	10.5641	9.19967	4.16993	10.3253	8.88874	0	5.67243	0
FGD4	0	6.08746	0	2.80735	3.45943	6.14975	5.24793	5.58496	4.52356	0	4.80735	5.16993	2.32193	0	0	4.80735	0	4	5.58496	0	3.90689	3.80735	0	0	5.64386	1.58496
FGF11	0	0	0	0	0	0	0	0	0	0	0	0	0	0	0	0	0	0	0	0	0	0	0	0	0	0
FGFBP2	0	0	0	0	1	0	0	0	0	0	0	0	0	0	0	0	0	0	0	0	0	0	0	0	0	0
FGFR1OP	0	3.90689	0	3.80735	3.16993	0	5.08746	3.16993	0	4.9542	2.58496	3.32193	4.32193	0	0	0	0	0	1.58496	0	0	0	3	0	4.08746	2.80735
FGG	10.0715	9.54882	10.9241	8.30378	12.5791	6.47573	7.47573	8.633	10.007	9.45533	4.24793	4.45943	5	0	8.49185	6.10852	7.40088	8.45943	10.4696	8.07682	3.70044	10.2021	8.13955	3.90689	6.50779	3.32193
FGGY	0	4.80735	0	0	3.80735	0	5.35755	0	0	1.58496	0	0	0	0	0	0	0	0	0	0	0	0	0	0	0	0
FH	6.37504	6.10852	5.39232	7.97154	7.25739	7.93074	6.79442	7.05528	6.42626	6.85798	7.70044	7.76155	7.47573	2.32193	4.45943	4.9542	5.64386	5.04439	7.2384	6.06609	6.04439	3.45943	5.32193	4.24793	7.10852	7.25739
FHOD1	1.58496	5.97728	4.64386	1	4.08746	0	4.80735	4.16993	2.80735	0	0	0	0	0	2.80735	4.08746	2.80735	0	1	0	0	0	0	0	4.32193	0
FIBP	0	5.12928	3.45943	2.32193	3	5.42626	4.08746	5.20945	3.16993	4.32193	0	3.70044	0	0	0	0	0	1	0	0	2	0	0	0	4.16993	0
FIP1L1	0	5.20945	3.90689	4	5.9542	3	6.04439	4	3.16993	3.90689	6.49185	5.42626	3.90689	1.58496	2.32193	0	3	2	4.58496	0	2.58496	5.97728	5.08746	0	4.70044	5.78136
FIS1	3.16993	3.16993	3	3	3.90689	4	2.80735	3.32193	3.80735	4.16993	4.32193	4.80735	2.58496	0	2	0	3.16993	1.58496	2.80735	3.45943	3	1.58496	3.70044	4.80735	3.32193	4.70044
FITM2	0	1.58496	0	0	0	0	1	0	1.58496	0	0	0	0	0	0	0	0	0	0	0	0	0	0	0	1	1.58496
FKBP11	1	0	0	2	6.04439	3.90689	2.58496	4.24793	0	1.58496	3.58496	4.80735	5.08746	0	0	0	1.58496	0	3.70044	0	0	3.58496	3.70044	0	0	3.32193
FKBP12-Exip2	2.58496	4.45943	4.39232	3.32193	3.70044	3.90689	3.80735	4.39232	3.45943	3.58496	2	3	3.16993	2	2	2	2.80735	0	2	3.16993	2	0	0	0	4.39232	2.80735
FKBP14	0	2.58496	0	3.16993	3.32193	2	3.70044	0	0	0	0	1.58496	0	0	0	0	0	0	0	0	0	0	0	2.58496	0	0
FKBP1A	4.45943	6.75489	6.78136	5.93074	4.85798	5.42626	6.76818	6.44294	5.04439	6.87036	5.61471	4.90689	5.93074	2.58496	4.58496	4.58496	4.08746	3.90689	1.58496	4.24793	3.58496	3.45943	4.24793	4.08746	6.40939	5.35755
FKBP2	2.58496	5.32193	5.32193	5.78136	4.32193	4.52356	4.85798	4.75489	4.24793	4.58496	5.61471	5.88264	5.61471	0	2.80735	2.58496	4.08746	1.58496	5.32193	4	3	0	3.32193	0	5.42626	4.9542
FKBP3	0	5.49185	4.32193	5.97728	5.64386	4.24793	6.55459	4.58496	0	5.49185	5.04439	5.35755	5	0	3.58496	3.45943	0	0	0	4.58496	0	3.70044	1.58496	3.45943	4	4.80735
FKBP4	7.50779	6.02237	5.08746	8.04985	7.92481	8.02237	8.59246	6.65821	6.2854	7.49185	5.12928	7.94837	7.01123	0	5.72792	5.35755	3.45943	4.58496	4.16993	3.70044	6.20945	5.2854	6.52356	6.10852	5.12928	5.9542
FKBP6	0	3.32193	0	0	0	0	0	1	1.58496	0	0	0	0	0	0	0	0	0	0	0	0	0	0	0	0	0
FKBP8	1	4.16993	0	4.90689	1	4.45943	5.35755	2.58496	4.39232	2.32193	4.58496	5.24793	2.58496	0	2.80735	3.32193	3.32193	4	2	0	0	0	0	0	3	5.72792
FKBP9	1	0	0	2	1.58496	4.32193	3.90689	4.75489	5.52356	5.58496	0	4.52356	1.58496	0	0	0	0	0	0	4.39232	0	3.16993	0	0	4.80735	5.04439
FLAD1	0	5.80735	0	5.16993	6.33985	5.70044	6.55459	5.55459	6.10852	6.50779	6	5.55459	3.58496	0	2.80735	0	1.58496	2.58496	4.08746	0	6.02237	0	1.58496	0	7.14975	6.74147
FLII	4.9542	8.633	7.06609	6.52356	7.87036	8.24317	7.42626	7.03342	5.97728	0	5.70044	7.43463	6.91886	3.58496	5.08746	4.80735	6.18982	2	0	0	1	4	5.52356	0	5.88264	2.58496
FLNA	11.151	13.0577	12.279	11.1904	11.5906	12.4442	11.0855	11.7698	11.0369	11.4843	11.1954	9.30378	11.0362	10.2574	11.1241	11.0908	10.2854	10.9454	9.24317	7.60733	8.27146	10.4959	10.2958	9.67243	10.703	10.1459
FLNB	10.4073	11.1737	9.71253	12.3796	12.4383	12.8861	12.6843	12.2497	10.1972	12.6974	12.1075	11.275	12.363	4.80735	10.5088	10.0389	8.13443	9.57365	10.3332	11.1286	9.33762	10.3794	9.85643	9.32418	9.72281	11.1241
FLNC	6	9.19476	7.49985	7.64386	8.61471	8.66534	8.85487	8.47573	7.27612	7.22882	7.31288	5.70044	7.81378	4.58496	7.47573	6.85798	6.78136	7.08746	6.22882	6.12928	6.16993	5.2854	7.43463	7.17991	8.10852	7.48382
FLOT1	6.04439	10.3026	9.23122	9.21432	9.95128	9.21917	9.78463	9.65284	8.70736	6.96578	9.55651	8.59246	7.37504	7.2854	8.19476	7.54689	6.91886	8.47573	9.0634	7.21917	6.33985	8.33539	8.34873	4.58496	7.98299	7.9542
FLOT2	5.2854	7.80735	7.69349	7.31288	7.40088	8.04985	7.39232	8.49185	8.04985	6.71425	7.2854	8.03892	7.06609	6.67243	5.70044	4.64386	6.26679	7.24793	8.46761	6.37504	6.26679	7.01123	7.27612	3.16993	6.80735	6.55459
FLYWCH2	0	2	0	3.16993	0	3.58496	3	0	0	0	1.58496	1	1.58496	0	2.80735	0	0	0	0	0	0	0	0	0	2	0
FMR1	0	2.58496	0	6.85798	2.32193	4.08746	5.67243	6.26679	0	2.32193	4.32193	3.45943	0	0	1	0	0	0	0	0	0	0	1	0	0	2.80735
FN1	0	10.3641	7.50779	0	15.1392	0	2.32193	7.9542	4.85798	0	6.37504	5	0	0	4.9542	10.6073	7.21917	8.60733	11.2222	9.86882	10.5793	10.3287	10.3095	0	7.57743	0
FN3K	0	0	0	3	2.58496	4.52356	2.80735	2.80735	2.58496	0	2.32193	2.58496	1.58496	0	0	0	0	0	0	2.32193	0	0	0	0	0	2.58496
FN3KRP	0	2.80735	0	2.32193	2	4.24793	4.90689	3	2	0	3.16993	0	0	0	0	0	0	0	0	0	0	0	0	2	0	0
FNDC3A	0	3.58496	4.64386	3.80735	4.08746	0	2	6.04439	3	4.08746	6.61471	3.45943	6.6865	0	2.80735	0	0	0	0	0	0	3.70044	0	0	3	3.70044
FNTA	3	6.37504	4.39232	6.20945	5	5.85798	6.44294	6.32193	6.26679	0	5.72792	3.90689	6.39232	0	0	1.58496	4.52356	4.32193	0	4.58496	2.58496	1	1.58496	3.70044	6.98868	3.45943
FOLR3	0	5.67243	5.2854	0	0	1.58496	2.32193	4.52356	5.45943	1	3.58496	0	0	0	0	2.58496	1.58496	2.32193	0	0	1.58496	0	0	0	1	1
FOPNL	0	0	0	1	0	0	0	0	0	0	0	0	0	0	0	0	1.58496	0	0	0	0	0	0	0	0	0
FOSL2	0	0	0	0	3.16993	1.58496	4.24793	0	0	5.04439	4.16993	0	0	0	0	0	0	0	0	0	0	1.58496	0	0	0	0
FOXA3	0	0	0	0	2	0	0	0	0	0	0	0	0	0	0	0	0	0	0	0	0	0	0	0	0	0
FOXK1	0	5.16993	0	1	6	2.32193	0	2	0	4	3.70044	4.39232	2.32193	0	0	2.80735	0	0	1	3.90689	0	3	0	0	1.58496	2
FOXN1	0	0	0	0	2.58496	0	3.58496	0	0	0	0	1	0	0	0	0	0	0	0	0	0	0	0	0	0	0
FOXP1	0	3.32193	0	0	2.58496	0	0	3	0	0	0	2.58496	0	0	0	0	0	0	0	0	0	0	0	0	4.39232	0
FOXRED2	3.45943	0	0	1.58496	0	0	0	0	0	0	0	0	0	0	0	0	0	0	0	0	1.58496	0	0	0	0	0
FRAT2	0	0	0	0	2	0	0	0	0	0	0	0	0	0	0	0	0	0	0	0	0	0	0	0	0	0
FREM1	0	0	0	0	4.39232	3.80735	0	0	0	0	0	0	0	0	0	0	0	0	0	0	0	0	0	0	0	0
FRG1	0	2.32193	0	1.58496	1	0	3.80735	0	0	2.58496	1	0	0	0	1	1	0	0	0	0	0	2.32193	1	0	0	0
FRK	0	0	0	0	4.58496	5.16993	6.22882	4.39232	0	1	5.64386	3.80735	4.39232	0	0	0	0	0	4.32193	1.58496	0	0	0	0	0	3.90689
FRMD4B	0	0	0	0	1	0	0	2.58496	0	0	2.80735	0	0	0	0	0	0	0	2.32193	0	0	4.24793	0	0	0	0
FRMD5	0	0	0	1	3.45943	0	2	0	0	0	0	3.45943	0	0	0	0	0	0	0	0	0	0	0	0	0	2.32193
FRMD8	0	4.32193	3.32193	2.58496	0	0	3.32193	1	0	1.58496	3.16993	2.32193	0	0	0	1	3	0	2	3.16993	0	0	2	0	2.58496	0
FRYL	2	7.48382	0	0	4.45943	6.67243	7.02237	4.08746	4.45943	0	0	0	0	0	0	0	0	0	3.45943	0	0	0	4.58496	0	5.04439	0
FSCN3	0	0	0	0	1.58496	0	0	0	0	0	0	0	0	0	0	0	0	0	0	0	0	0	0	0	0	0
FTCD	0	2.80735	0	0	2.80735	0	1	2.58496	0	0	0	1.58496	0	0	0	0	1.58496	3.90689	0	0	0	0	2.58496	0	2.80735	0
FTH1	6.76818	9.26679	7.64386	0	7.56224	6.59991	7.29462	6.87036	6.20945	6.24793	5.24793	5.20945	6.70044	6.72792	6.37504	5.42626	6.62936	8.34873	6.6865	0	5.08746	4.45943	5.49185	3.70044	5.61471	6.30378
FTL	7.54689	7.98868	7.86419	5.12928	8.25739	6.76818	8.04439	7.08746	6.64386	6.16993	5.83289	4.90689	7.15987	6.33985	6.67243	6.18982	7.45121	7.98868	6.98868	7.04439	6.40939	5.49185	5.32193	4.32193	6.32193	7.11894
FTO	0	5.70044	3.32193	2.32193	4.90689	2.80735	4.45943	5.49185	3.16993	0	5.12928	4.39232	3	1	0	0	0	0	0	0	4.08746	0	0	0	4.24793	0
FTSJ3	0	0	0	2.32193	4.08746	4.32193	5.55459	0	0	0	4.32193	2.80735	4.58496	0	0	0	0	0	3.90689	3.16993	0	2.80735	0	0	3.45943	5.12928
FUBP1	7.54689	8.94251	8.20457	8.28077	8.33092	8.02237	8.63662	8.42206	7.33985	8.18982	7.45943	8.16993	8.53916	4.52356	7.21917	6.75489	4.80735	6.18982	7.3837	6.12928	7.41785	8.03342	7.29462	4.64386	7.76818	7.77479
FUBP3	4.90689	6.52356	5.32193	6.14975	6.9542	6.18982	6.71425	6.22882	4.64386	4.90689	5.70044	7.27612	6.12928	0	5.45943	4.64386	4.16993	3.90689	4.80735	4.16993	4	4.70044	5.55459	0	5.55459	5.88264
FUCA2	3.32193	3	2.58496	4.24793	2.32193	2.58496	4.08746	3.80735	4.32193	0	4.75489	2.58496	3	1	0	0	0	1	2.58496	0	3.32193	0	0	0	4.75489	1.58496
FUNDC2	0	0	0	0	2.32193	1	0	0	0	0	0	0	0	0	0	0	2.80735	2.32193	3.58496	0	0	0	0	0	0	3.58496
FUS	5.78136	6.39232	6.04439	7.10852	7.2384	6.37504	6.90689	7.2854	5.67243	6.94251	6.14975	6.16993	5.39232	0	4.9542	6.26679	2.80735	3.90689	6.78136	6.16993	4.39232	5.2854	4.75489	5.39232	5.16993	5.93074
FUSIP1	2.32193	1	1.58496	2.32193	2.58496	3.16993	4	3.45943	1.58496	3.45943	2	2.32193	1	1	1	3	0	2	1.58496	1.58496	3.32193	3.58496	3.58496	0	1.58496	1.58496
FUT3	0	0	0	0	2	7.17991	4.9542	4.9542	4.45943	0	0	5.64386	2.32193	0	0	0	0	0	3.16993	3.58496	0	0	0	0	0	0
FUT4	0	0	0	0	2.32193	0	0	3.80735	2.32193	0	4.58496	0	0	0	0	0	0	0	0	0	0	0	0	0	3.16993	0
FUT8	2	0	4.08746	1.58496	6.64386	6.14975	7.14975	5.49185	6.24793	3.90689	7.07682	4.16993	4.85798	0	0	0	0	0	0	0	4.9542	3.80735	3.70044	2.80735	6.18982	5.80735
FXN	3.45943	2	0	0	4.24793	2.80735	0	3	1.58496	1.58496	3.45943	0	0	2	2	1.58496	0	1	0	0	2.80735	0	2	2.58496	0	0
FXR1	5.49185	6.42626	0	5.67243	6.40939	5.32193	6.62936	7.10852	4.52356	5.52356	4.80735	5.61471	0	0	0	4.9542	0	4.45943	5.80735	0	6.88264	5.90689	5.97728	5.58496	5.35755	3.70044
FXR2	0	3.16993	0	4.45943	2.58496	3	5.45943	3.70044	0	3.70044	3.70044	3.58496	0	0	0	0	2.32193	0	0	0	0	0	1	0	0	0
FXYD3	4.39232	0	2.32193	3.80735	2	4.32193	5.35755	2.80735	3.70044	3	4.32193	2	3.58496	0	0	0	0	0	3.90689	4.39232	3.70044	1.58496	3.45943	2	3.16993	2
FYCO1	0	4.90689	0	2.80735	4.45943	5.45943	2.32193	3.45943	0	4.39232	0	0	0	0	0	3.58496	3.32193	4.45943	4.9542	0	4.64386	0	0	4.70044	0	3.32193
G2E3	0	4	0	0	2.80735	0	1.58496	0	0	0	0	0	0	0	0	0	0	0	0	0	0	0	0	0	0	0
G3BP1	5.20945	7.27612	6.44294	6.82018	6.91886	6.53916	7.49185	6.58496	5.42626	6.91886	6.04439	7.19967	6.55459	2.32193	4.32193	4.39232	3.45943	4.08746	4.32193	2	3.90689	5.61471	4.85798	3.70044	6.62936	5.70044
G3BP2	0	6.6865	5.61471	6.78136	7.07682	5.32193	7.5157	6.96578	4	5.93074	7.13955	6.93074	5.64386	0	1	4.24793	0	0	4.70044	1	4.24793	4.64386	4.90689	0	5.35755	6.20945
G6B	0	0	0	0	2	0	0	0	0	0	0	0	0	0	0	0	0	0	0	0	0	0	0	0	0	0
G6PD	8.77479	9.28077	8.14466	6.76818	10.5127	8.37938	9.14211	7.10852	7.56986	5.61471	5.58496	7.29462	7.01123	7.76155	7.2854	6.88264	6.59991	7.90087	7.07682	3.16993	10.4346	9.31061	6.72792	7.35755	7.89482	5.9542
GAA	3	8.41363	7.25739	5.78136	4.85798	5.88264	5.24793	7.08746	6.59991	3.32193	7.05528	3.45943	4.64386	3	3	6.12928	7.06609	5.88264	2.58496	4.45943	0	5.52356	3.58496	0	6.6865	7.21917
GABARAP	0	0	3.70044	1	1.58496	3.45943	1.58496	0	0	0	1.58496	0	0	0	0	0	0	0	0	0	0	0	0	0	0	0
GABRG2	0	0	0	0	0	0	0	0	0	0	0	2.58496	0	0	0	0	0	0	0	0	0	0	0	0	0	0
GADD45A	0	0	0	0	0	0	1	0	0	0	0	0	0	0	0	1.58496	0	0	0	0	0	0	0	0	0	0
GADD45GIP1	0	2.32193	0	2.80735	1	3.45943	4.45943	3.16993	1.58496	3	3.58496	3.32193	3.90689	0	0	0	0	0	0	1	0	2.58496	0	0	1.58496	2.58496
GADL1	0	0	0	0	3	0	0	0	0	0	0	0	0	0	0	0	0	0	0	0	0	0	0	0	0	0
GAK	4.70044	4.85798	4	0	3.45943	4.64386	4.45943	5.78136	4.85798	3.80735	0	4.75489	4	0	1.58496	0	0	0	4.45943	4.70044	2.58496	5.12928	0	3.16993	0	0
GAL3ST4	0	2.32193	2	0	0	0	0	0	0	1	0	0	0	0	0	0	0	0	0	0	0	0	0	0	1	1
GALC	4.24793	4.32193	3.45943	0	3	6.45943	5.78136	6.9542	5.64386	0	7.90689	0	6.40939	0	3.16993	0	0	3.80735	3.45943	5.93074	0	0	0	4.39232	3.16993	3.80735
GALE	5.35755	4.9542	0	7.12928	7.82655	8.75489	8.90087	6.98868	8.21432	4.45943	7.7879	6.58496	5.58496	0	0	3.80735	2.32193	0	4.52356	2	5.9542	5.16993	0	5.04439	9.02514	5.70044
GALK1	3	6.58496	4.39232	2.80735	5.24793	6.24793	5.88264	2.58496	2.32193	1.58496	4.52356	4.70044	3.32193	0	1.58496	4	4.32193	3.45943	1	1	0	1.58496	1	3	3.32193	4.85798
GALK2	2.32193	0	0	0	1.58496	0	4.08746	0	5.20945	1	4.32193	3.58496	1	0	0	0	0	0	0	0	3.32193	0	0	0	2.32193	0
GALM	4.45943	4.80735	3.58496	0	5.42626	5.39232	1	5.88264	3.80735	5.16993	5.78136	5.72792	5.32193	0	4.75489	3.16993	5.04439	1.58496	0	0	0	3.45943	3.16993	0	4.90689	3.80735
GALNT1	0	6.55459	4.90689	1	5	6.14975	6.18982	5.45943	3.45943	3.58496	4.32193	0	0	0	0	4.32193	0	2.80735	0	0	2.32193	4.16993	0	1.58496	4.75489	4.52356
GALNT10	0	0	0	0	3.80735	0	0	0	0	0	0	0	0	0	0	0	1.58496	0	0	0	3.45943	0	0	0	1	0
GALNT12	0	0	0	0	1.58496	5.67243	3.16993	2	0	0	2.32193	0	0	0	0	0	0	0	2.32193	0	0	0	0	0	0	3.16993
GALNT16	0	0	0	0	3.90689	0	0	0	0	0	0	0	0	0	0	0	0	0	0	0	0	0	0	0	0	0
GALNT2	0	5.32193	5.39232	4.70044	6.75489	7.12928	6.42626	4.85798	4.52356	0	2.80735	3.32193	0	0	0	2.58496	0	3.45943	6.02237	0	0	5.61471	0	0	5.45943	6.70044
GALNT3	2.80735	0	0	6.74147	2.58496	8.70044	7.7211	7.53138	7.10852	4.90689	6.91886	7.13955	6.44294	2.58496	0	0	0	0	8.27612	3.32193	4.64386	5.64386	0	0	6.85798	7.67948
GALNT4	0	2	4.08746	2.58496	6.76818	7.30378	7.52356	6.50779	6.45943	4.24793	4.70044	4.32193	1.58496	0	0	0	0	0	0	5.45943	3	4.08746	0	0	6.47573	6.45943
GALNT6	4.45943	0	0	5	4.39232	6.45943	3	4.58496	2.80735	0	3.80735	0	0	0	0	2.32193	0	1.58496	4.32193	0	2.80735	0	0	0	5.12928	3.32193
GALNT7	3	1	4.64386	5.20945	5.49185	8.00562	8.79766	6.61471	6.44294	5.12928	7.2384	4.45943	6.40939	0	0	0	0	0	5.32193	5.58496	5.97728	5.61471	3	4.45943	6.24793	5
GALT	0	4.16993	3.58496	0	3.16993	1.58496	2.32193	0	2.80735	0	3	2.58496	0	0	0	0	0	0	0	0	0	0	0	0	2.80735	0
GANAB	9.60733	11.5694	10.8525	10.6768	10.3934	11.4003	11.4853	10.9388	10.1774	10.444	10.4522	10.7805	10.1408	7.44294	8.35315	9.89785	9.32418	10.0647	10.7977	9.52356	9.50978	9.5157	9.62936	9.1472	10.568	10.544
GAPDH	9.97154	11.0478	10.6591	11.1592	10.8186	9.75656	11.0841	9.4818	8.81378	10.2958	9.50779	10.4919	10.7756	5.70044	9.43254	9.15228	8.37504	8.62936	9.35094	8.40088	8.44294	8.53138	7.58496	8.06609	9.70044	10.0098
GAPDHS	0	2.58496	0	3.32193	2.58496	0	3.90689	2.58496	1.58496	2.32193	3	3.70044	3.32193	1	0	2	3.16993	0	1.58496	0	2.58496	2.58496	3	1	3.32193	3.80735
GAPVD1	1	6.49185	1.58496	5.67243	6.78136	6.06609	5.93074	2.32193	0	3.16993	0	6.56986	0	0	0	0	0	2.80735	4.16993	2.58496	0	0	0	0	4.58496	4.16993
GAR1	0	3	0	0	4.32193	2.80735	4.24793	3.70044	2.32193	1	3.70044	1	0	0	0	2.80735	1.58496	2.80735	3.58496	0	0	3.70044	3.45943	0	2.80735	2.32193
GARNL3	3.90689	2.32193	0	2.58496	5.08746	0	0	2	1.58496	0	0	3.90689	0	0	0	0	0	0	4.16993	0	0	0	0	0	0	0
GARS	6.83289	5.55459	5.64386	7.04439	7.18982	7.59991	6.67243	6.10852	7.27612	6.08746	6.2854	7.56986	6.40939	3.45943	5.08746	3.45943	4.58496	4.32193	4.70044	0	5.16993	3.32193	5.61471	4.52356	7.41785	6.79442
GART	6.80735	7.48382	7.06609	8.37504	6.65821	8.74819	7.55459	7.87036	8.52748	7.09803	7.01123	9.05257	7.19967	0	4.90689	5.35755	5.75489	4.75489	4.52356	3.70044	4.24793	4	5.20945	6.62936	8.5812	8.71768
GAS2L2	0	0	0	0	3.16993	0	0	0	0	3.16993	0	0	0	0	2.32193	0	0	0	0	0	0	0	0	0	0	0
GAS7	1.58496	2.80735	1	0	0	0	0	4.08746	0	1	2	0	0	0	0	2.80735	0	0	1	0	0	0	0	0	4.80735	1
GATA4	0	0	1	0	6.44294	0	0	2	0	3.70044	4.08746	7.07682	0	0	0	0	0	0	0	2	0	0	0	0	0	0
GATA6	0	0	0	1	3.70044	0	0	0	0	3.58496	4.58496	2.58496	0	0	0	0	0	0	0	0	0	0	1.58496	0	0	0
GATAD2A	0	6.59991	0	2.80735	5.24793	4.75489	7.54689	5.12928	2.32193	3.16993	5.42626	5.70044	2.32193	0	3.80735	0	0	0	3.32193	3	0	2.80735	0	0	0	4.58496
GATAD2B	0	3.90689	0	5.35755	4.85798	1.58496	2.32193	4.85798	0	0	4.45943	4.52356	4.16993	0	2.58496	0	0	0	4	0	0	0	0	0	4.16993	2.80735
GATC	0	2.58496	0	2.58496	2.32193	1	4	3.16993	1	4	1	2.58496	3	0	0	0	0	0	0	0	0	0	1	2.32193	1	3.90689
GATM	4.58496	5.88264	0	0	2	8.79116	8.73809	8.74483	7.46761	0	8.3443	4.45943	3.80735	0	0	1	3	0	0	3.45943	0	3.70044	5.58496	2.58496	7.67948	6.20945
GBA	0	6.94251	5.32193	6.70044	4.24793	6.37504	4.90689	6.71425	5.72792	3	4.45943	5.04439	6.37504	0	0	2.58496	4.52356	0	6.6865	4.52356	0	3.70044	0	0	6.20945	7.05528
GBA2	0	1	0	0	4.24793	4.39232	4.16993	0	0	0	0	0	0	0	0	0	0	0	0	0	0	0	0	0	0	0
GBAS	3.58496	6.50779	4.24793	4.64386	5.24793	6.91886	5.61471	5.49185	6.06609	5.20945	5.52356	8.37069	5.58496	0	2.80735	4	3.80735	4.85798	4.85798	0	3.90689	4.85798	3.90689	4.08746	6.32193	8.09803
GBE1	3.90689	6.67243	4.39232	3.45943	6.47573	5	6.44294	4.70044	3.58496	4.45943	5.35755	0	4.64386	0	2.32193	0	3.45943	3.45943	6.08746	3.80735	0	0	0	0	5.04439	4.39232
GBF1	1.58496	7.65105	5.93074	0	7.65821	6.12928	7.33092	6.22882	4.16993	0	5.45943	0	0	0	0	4.75489	0	0	5.2854	2.32193	0	5.20945	0	0	6.75489	6.35755
GBP1	3.16993	6.70044	8.30834	3.32193	3.58496	6.22882	5.78136	5.88264	5.39232	5.49185	4.45943	4.24793	5.67243	0	5.88264	5.67243	4.58496	5.58496	3.16993	1.58496	2.58496	3	0	0	5.32193	5
GBP2	2.32193	6.45943	7.3837	3.45943	3.16993	5.97728	5.12928	5.35755	5	4.64386	5.49185	3.80735	5.08746	0	5.16993	5.08746	4.58496	5.88264	3.32193	3.58496	0	2.32193	0	0	5.32193	4.24793
GBP3	0	5.67243	7.93664	0	1.58496	3.80735	4.16993	3.58496	2.80735	4.70044	3.80735	0	4.16993	0	0	2.80735	0	3.80735	0	0	2	0	0	0	3.80735	4.64386
GBX2	0	0	0	0	1	0	0	0	0	0	0	0	0	0	0	0	0	0	0	0	0	0	0	0	0	0
GC	0	6.53916	1.58496	0	4	4.70044	4.85798	5.12928	1.58496	0	3	3.90689	1.58496	2.58496	5.2854	2.32193	1.58496	4.64386	5.45943	5	5.04439	2	3.32193	2.32193	2.32193	0
GCA	5.90689	6.9542	3.70044	4.08746	3.80735	4.45943	4.80735	5.04439	7.5157	2.32193	3.16993	3.70044	3.58496	7.93664	6.35755	4.24793	5.70044	6.88264	4.58496	0	6.59991	3.90689	5.93074	4.75489	5	2.80735
GCDH	4.08746	5.61471	0	3.45943	4.58496	6.30378	5.35755	4.58496	5.39232	2.58496	3.80735	4.75489	1.58496	0	2.58496	0	2.32193	3.58496	2	1	4.24793	1	3.45943	2.80735	4.52356	6.10852
GCFC2	0	1.58496	0	0	5.20945	4.58496	0	0	2.32193	0	0	1.58496	0	0	0	0	0	0	0	1	0	0	0	0	4	0
GCHFR	0	2.80735	3.16993	3.70044	3.16993	0	5.12928	3.90689	2	0	4.16993	2	0	0	0	0	0	0	0	0	0	0	0	0	3.80735	4.32193
GCKR	3.70044	3.45943	0	0	5.2854	0	0	0	0	0	2	0	0	0	0	0	0	0	0	0	0	0	0	0	0	0
GCLC	3.45943	5.24793	0	0	2	6.42626	5.52356	1	4.24793	5.88264	4.32193	4.70044	2	0	0	0	1	0	0	5.85798	6.49185	4.90689	1.58496	0	5.97728	4
GCLM	0	0	0	1	4.90689	0	0	0	0	0	0	2.80735	1.58496	0	0	0	0	0	0	0	5.61471	2.32193	0	0	2.32193	0
GCN1	7.67948	8.16491	6.71425	7.31288	8.43045	8.95128	9.47371	7.52356	7.40088	6.06609	6.75489	7.24793	5.80735	0	0	4.80735	4.80735	4.9542	5.2854	5.88264	6.61471	5.24793	6.32193	7.02237	7.75489	6.04439
GCNT3	3.16993	0	0	4.16993	8.30834	6.80735	7.54689	6.32193	5.20945	0	5.16993	6.90689	5.55459	0	0	0	0	0	0	6.65821	3.90689	0	0	2.32193	0	2.80735
GCSH	0	0	0	0	2.32193	2	2.32193	2.80735	2.80735	3	1.58496	3.16993	0	0	0	0	0	0	0	0	0	1.58496	1	2	0	1
GDA	0	2.58496	0	3.70044	4.64386	7.97728	7.05528	5.85798	6.04439	3.58496	7.49985	6.18982	3.32193	0	0	0	0	2.32193	1	5.83289	5.75489	0	0	0	0	0
GDAP1	2	2	0	2.80735	2.32193	0	1.58496	3.16993	2.32193	2	2.32193	2.32193	3	0	0	0	0	0	2.80735	0	0	2	0	3.58496	1.58496	2.32193
GDAP2	0	2.32193	0	0	0	0	0	0	0	0	2.32193	0	0	0	0	0	0	0	0	0	0	0	0	0	0	0
GDE1	0	6.10852	5.08746	4	3.16993	3.32193	4.9542	3.45943	0	2.58496	4.39232	0	2.32193	1	1	3.16993	1.58496	2.80735	3.16993	0	0	0	0	0	3.90689	4.90689
GDF15	0	0	0	1	3.16993	0	0	0	0	0	3.32193	0	1	0	0	0	0	0	0	3.16993	0	0	0	0	0	3.16993
GDI1	7.73471	8.55075	7.15987	8.28077	7.50779	8.18488	8.57365	7.26679	7.85798	6.89482	6.62936	7.2854	7.13955	5.24793	7.06609	6.83289	6.45943	6.83289	6.62936	5.90689	7.08746	6.62936	5.58496	6.12928	7	6.12928
GDI2	9.81538	10.944	9.58871	10.6375	9.31515	9.96723	10.8392	9.90087	10.1972	9.5411	9.1472	9.73809	9.45327	6.49185	9.16742	9.33762	8.81378	9.18488	8.96867	8.35755	9.633	9.02514	8.56224	8.32643	9.17742	8.43879
GDNF	0	0	0	0	0	0	0	1	0	0	0	0	0	0	0	0	0	0	0	0	0	0	0	0	0	0
GDPD1	0	5.12928	0	1	6.10852	4.39232	7.26679	3	0	0	4.39232	4.08746	1.58496	0	0	2	1	0	3.16993	1.58496	1	3.16993	0	0	4.32193	2.80735
GEMIN2	0	0	0	0	3.32193	0	3.16993	0	0	0	0	0	0	0	0	0	0	0	0	0	0	0	2	0	0	0
GEMIN4	3.80735	0	0	0	4.08746	5.39232	6.12928	0	0	3	0	0	0	0	0	4.24793	0	0	0	0	0	0	4.75489	4	2.80735	0
GEMIN6	1.58496	0	0	0	0	0	2.32193	2.32193	0	1.58496	0	1.58496	2	0	0	0	0	0	0	0	0	0	0	0	1.58496	0
GET4	2.32193	5.52356	2	5.35755	5.80735	4.58496	6.16993	4.75489	1.58496	1.58496	2.80735	4.64386	3.16993	1	0	0	2.32193	0	3.45943	0	4.16993	1.58496	3.45943	5.20945	5.52356	3
GFAP	5.78136	4.08746	4.32193	6.16993	4.08746	5.88264	5.67243	5.24793	5.49185	4.85798	6.84549	6.02237	6.55459	3.70044	2.32193	3.80735	3.32193	3.58496	4.70044	3.16993	5.52356	3.45943	4.85798	3.90689	5.58496	5.64386
GFM1	0	4.58496	0	4.9542	3.32193	7.76818	5.04439	7.26679	8	5.90689	6.30378	4.64386	5.58496	0	0	2.80735	0	3.90689	5.45943	0	5.58496	0	5.35755	5.42626	5.49185	6
GFPT1	7.64386	0	4.80735	7.90689	7.21917	9.16239	7.9542	7.97728	7.63662	6.39232	7.06609	7.66534	8.67596	0	0	4.39232	0	2	7.10852	7.44294	5.83289	5.9542	5.04439	5.72792	8.5812	7.14975
GFRA2	0	0	0	0	1	0	0	1.58496	0	0	0	0	0	0	0	0	0	0	3.80735	3.32193	1	0	0	0	0	0
GGCT	6.9542	4.70044	4.24793	7.64386	4.85798	6.32193	6.91886	6.22882	5.08746	6.44294	5.12928	6.72792	5.04439	0	3.90689	1.58496	3.80735	0	2.58496	3.90689	4.24793	0	1.58496	0	5.49185	4.75489
GGCX	0	2	3.45943	3	4.32193	0	4.39232	3	4.52356	2.58496	3.45943	3.90689	1	0	0	0	0	0	3	3.80735	0	0	0	0	4.24793	4.08746
GGH	5.93074	6.16993	2.32193	3.70044	5	0	5.16993	5.90689	5.04439	0	3.32193	3.58496	4.08746	5.72792	4.39232	3.70044	4.32193	4.45943	3.80735	0	4.16993	2.58496	5.08746	5.04439	3.70044	5.70044
GGT1	0	0	1	1	0	2	2.58496	0	0	0	6.40939	0	1.58496	0	0	0	0	0	0	0	2.80735	0	2	0	1	1
GGT2	0	0	2.58496	0	3.16993	0	3.70044	0	0	0	5.90689	0	0	0	0	0	0	0	0	0	0	0	2.32193	0	0	2
GGT3P	0	0	0	0	3	0	2.32193	0	0	0	4.85798	0	0	0	0	0	0	0	0	0	0	0	2.58496	0	0	0
GGT5	0	0	0	1	1.58496	0	0	0	0	0	0	0	1.58496	0	1.58496	0	0	0	0	0	0	0	0	0	0	0
GGTLC3	0	0	0	0	1.58496	0	0	0	0	0	0	0	0	0	0	0	0	0	0	0	0	0	0	0	0	0
GHDC	3	6.71425	2.32193	0	4.08746	4	4.08746	4.16993	2	4.32193	5.16993	4.58496	0	0	0	0	4.45943	2	0	0	0	0	0	4.58496	3.70044	4.24793
GHITM	2.32193	4	3.45943	2.32193	4.85798	4.52356	3.80735	4.32193	4.39232	3.45943	1	0	3	0	0	0	2.32193	0	0	2.58496	0	0	1	0	2	3.90689
GID8	3.32193	4.08746	2.58496	3.58496	3.16993	3.58496	2.80735	3.70044	4	2.58496	2	2	3	0	2.80735	1	2	2.32193	3.70044	0	2.80735	3.16993	2	4.39232	3.70044	3.80735
GIGYF2	4.58496	2.32193	0	4.45943	6.22882	5.49185	5.45943	4.32193	2	5.39232	5.52356	5.55459	4.80735	0	2.80735	1.58496	0	0	0	0	0	2.32193	0	5.45943	5.24793	3.80735
GIMAP1	4.70044	7.66534	6.90689	0	2.32193	3.16993	3.70044	5.45943	3.16993	4.16993	4.16993	2	3.58496	1	3.70044	5.75489	5.52356	5.04439	2.32193	3	3.16993	3	3.16993	3.32193	4.58496	3.80735
GIMAP4	5.35755	8.48382	7.15987	0	4.85798	4.16993	4.80735	5.45943	5.2854	4.75489	5.20945	2.32193	4.16993	2.80735	5.83289	5.39232	6.08746	6.9542	2.58496	0	0	3.45943	4.80735	2.58496	6.82018	5.16993
GINS3	0	0	0	0	1	1.58496	3.32193	4	0	0	0	2.80735	0	0	0	0	0	0	0	0	0	0	0	0	3.58496	1
GIPC1	5.49185	2.32193	2	5.52356	0	4.24793	6.32193	5.08746	5.85798	2.58496	3.58496	4.9542	2.32193	0	4.08746	0	1	0	4.85798	2.32193	3	0	1.58496	1	2	4.64386
GIPR	0	0	0	1	0	0	0	0	0	0	0	0	0	0	0	0	0	0	0	0	0	0	0	0	0	0
GIT1	3.70044	6.14975	2.58496	0	3.45943	0	4.90689	3.45943	4.08746	0	4.85798	0	0	0	4	2	0	0	0	0	0	0	3.16993	3.58496	0	2.32193
GIT2	0	8.29002	2.80735	5	3.70044	0	5.12928	0	2	0	0	0	0	0	0	3.45943	4.90689	0	3.70044	0	0	0	0	0	0	0
GJA1	0	0	0	0	2	0	5.08746	5.12928	3.16993	0	0	0	0	0	0	0	0	2	0	0	0	0	2.32193	0	0	0
GJB7	0	0	0	0	0	0	0	0	0	0	0	0	0	0	0	0	0	0	0	0	0	0	0	0	0	0
GK	0	6.10852	2.58496	0	0	6.39232	5.78136	0	2	0	4.85798	1	0	0	0	0	2.32193	0	4.9542	0	0	0	0	0	2.80735	0
GLB1L2	2.58496	0	0	0	3.16993	2.80735	3	0	0	4.64386	3.90689	2	2.58496	0	0	0	0	0	2.58496	0	0	0	0	2.32193	0	0
GLE1	1	0	0	0	5.12928	0	4.32193	2.32193	0	0	0	2	0	0	0	0	0	0	0	0	3.32193	0	4.08746	3.58496	3.70044	4.16993
GLG1	7.8009	9.27146	8.61471	5.55459	4.52356	7.12928	8.64386	9.51373	6.76818	7.90087	7.39232	6.24793	6.39232	0	6.85798	7.24793	4.39232	5.70044	5.9542	5.90689	6.2854	8.03892	4.90689	6.78136	7.02237	7.59991
GLIPR2	0	5.04439	3.90689	0	3.16993	0	1.58496	4.58496	1.58496	0	1	1.58496	2.32193	2	4.08746	3.16993	2.32193	4.45943	0	0	0	2	1.58496	0	3	4.16993
GLIS3	0	0	0	0	3.80735	0	2	0	0	0	0	0	0	0	0	1	0	0	0	0	3.16993	1	0	0	0	0
GLMN	3.80735	4.75489	3.58496	5.55459	5.04439	5.83289	5.75489	4.08746	1.58496	0	4.32193	1.58496	0	0	0	0	0	0	0	0	1.58496	0	3	5.78136	5.72792	1.58496
[truncated: 14,450 more rows]
