# Supplementary material for: Proteogenomic Landscape of Gastric Adenocarcinoma Peritoneal Metastases
Source: Research Square preprint supplement (doi:10.21203/rs.3.rs-81037/v1), 2020-10-05

# Supplementary Figure-2

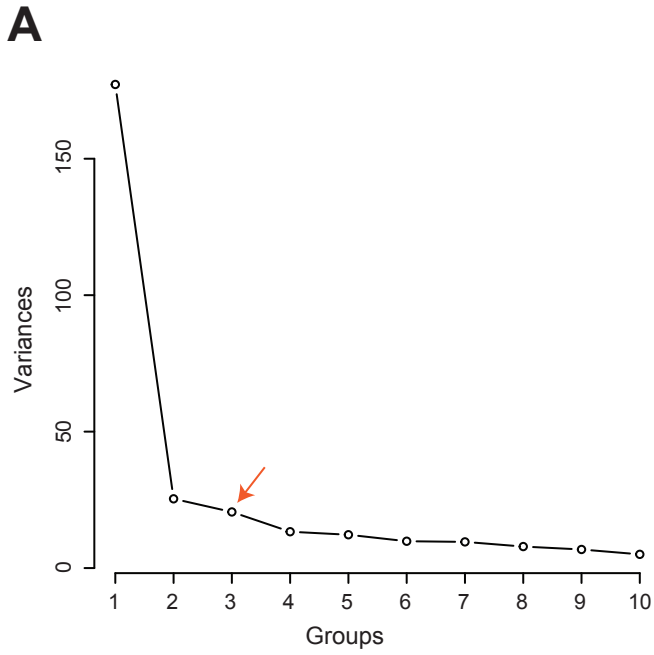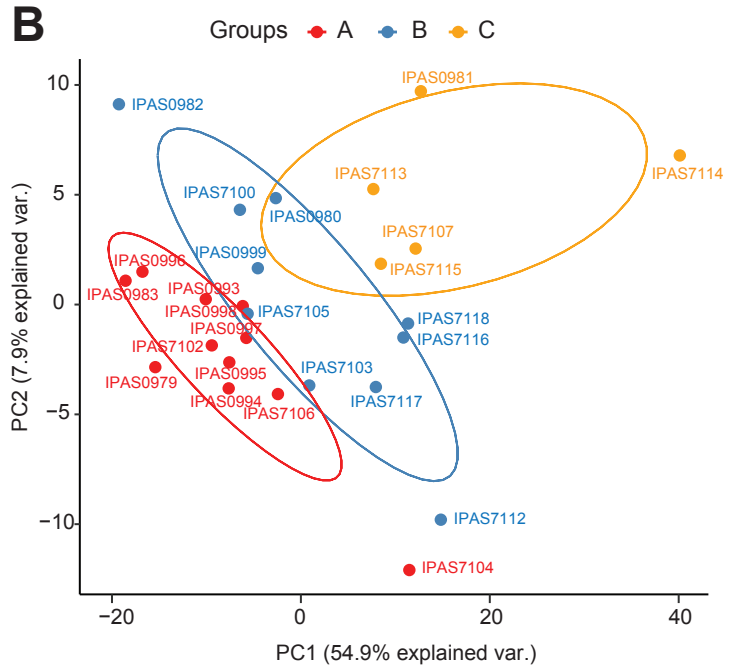

**C**

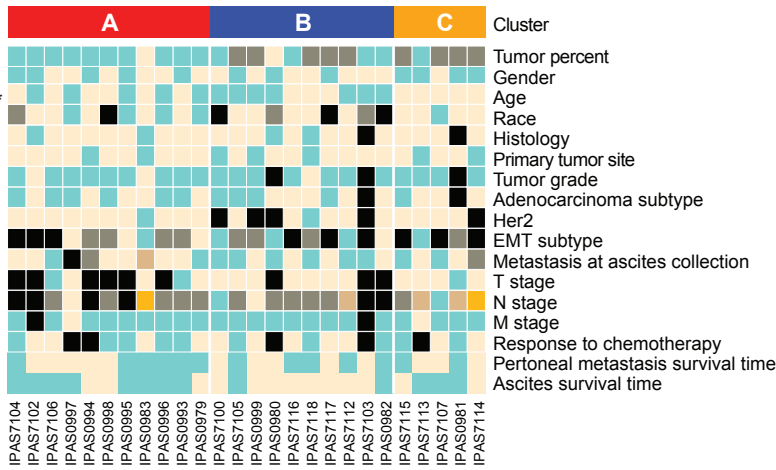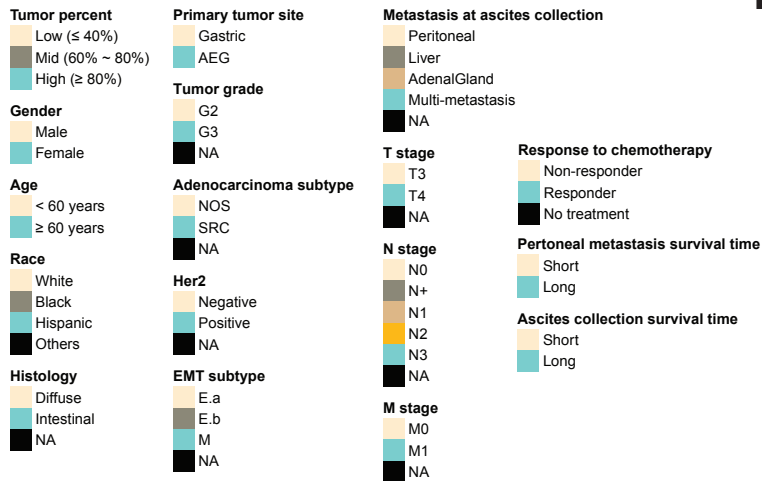

**D**

Multinomial logistic regression for age among three clusters

|               | P_Intercept | P_Age |
|---------------|-------------|-------|
| A             | 0.484       | 0.852 |
| B             | 0.763       | 0.867 |
| C (Reference) |             |       |

**E**

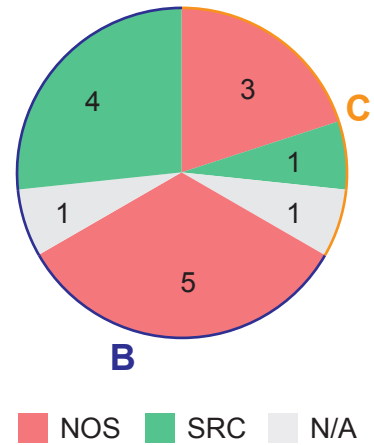

Supplement: Supplementary file 3 [file 5215eb6dadce1e0d1e0c3851.pdf]
