# Supplementary figures and images for: Proteogenomic Landscape of Gastric Adenocarcinoma Peritoneal Metastases
Source: Research Square preprint supplement (doi:10.21203/rs.3.rs-81037/v1), 2020-10-05

# Supplementary Figure-1

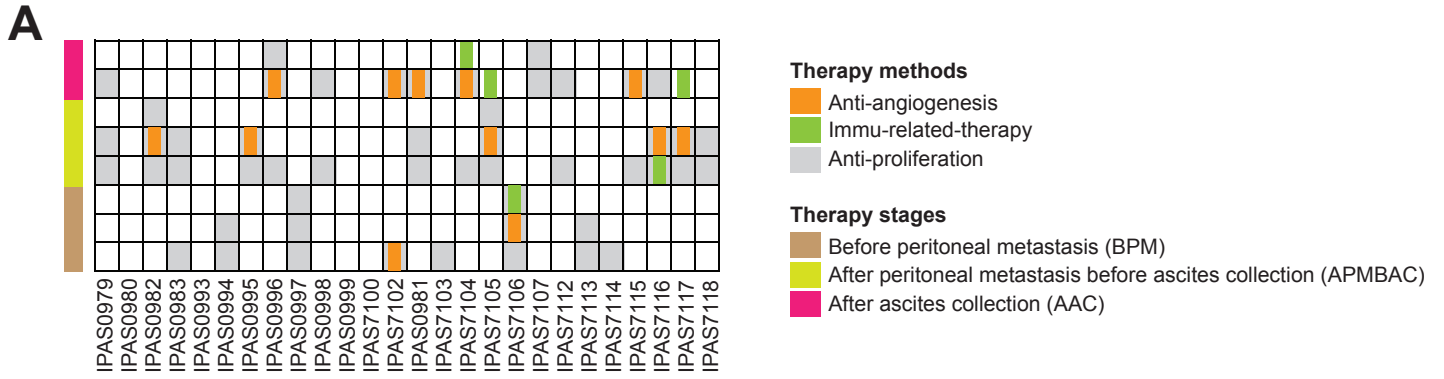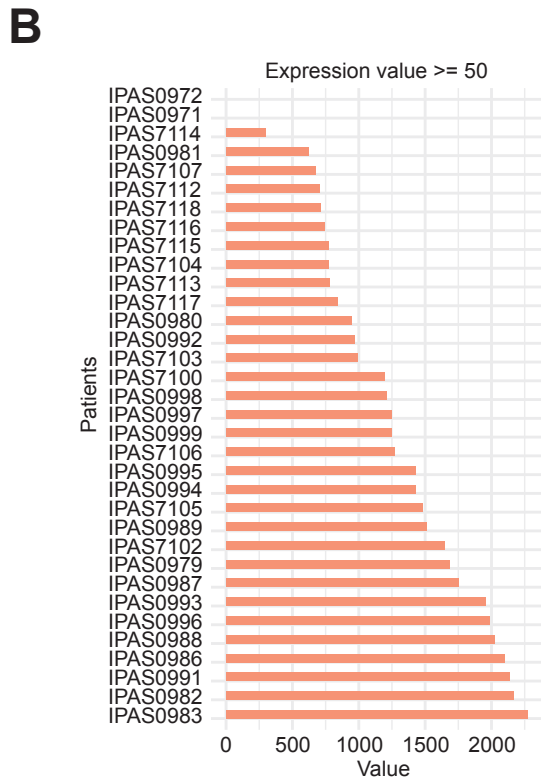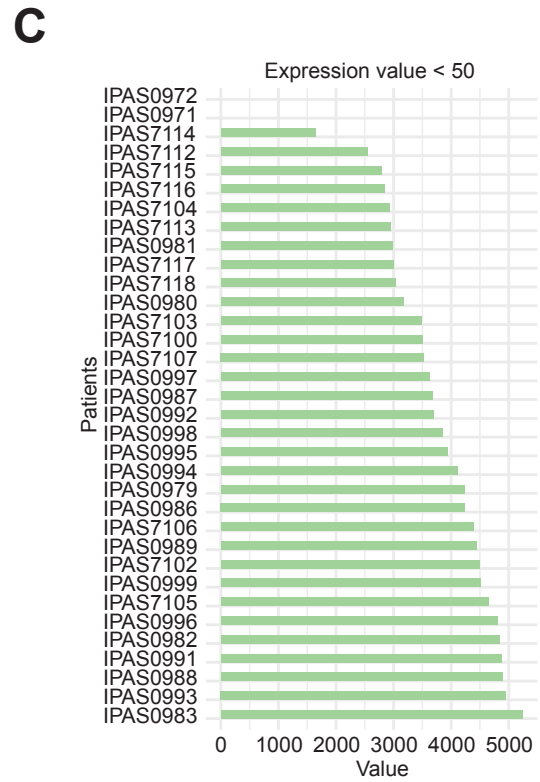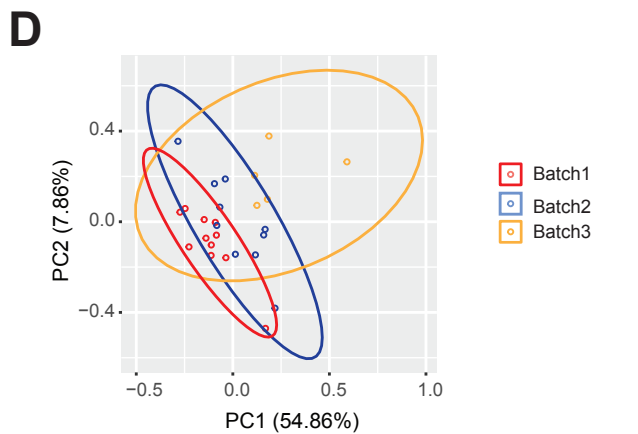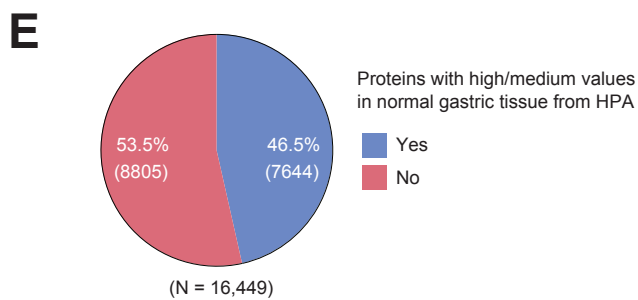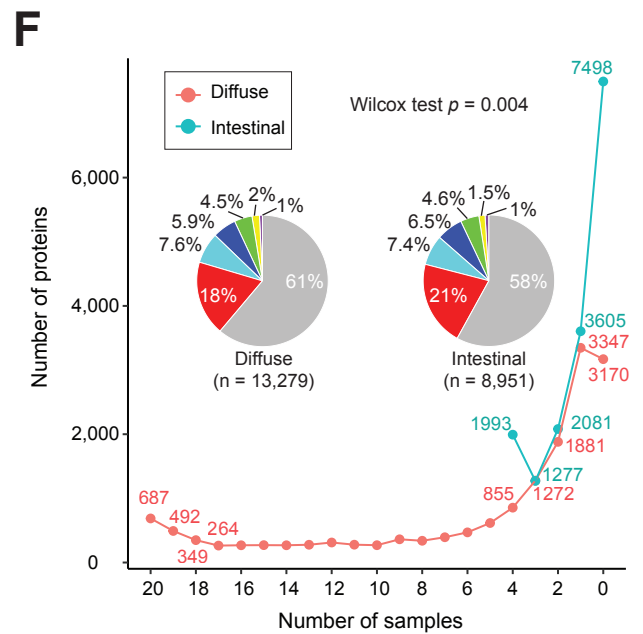

Supplement: Supplementary file 1 [file 098d33e0a32297d6eddbda87.pdf]
